# Supplementary material
Source: publisher figshare collection journal article supplement (https://acs.figshare.com/ndownloader/files/3733294)
Supplement: Supplementary file 1 [file 3733294]

 
data_1a
 
_audit_creation_method            SHELXL-2013
_chemical_name_systematic
;
Chlorido(8-quinolinolato-?N1,?O8)(?6-p-cymene)ruthenium(II)
;
_chemical_name_common             ?
_chemical_melting_point           ?
_chemical_formula_moiety         'C19 H20 Cl N O Ru' 
_chemical_formula_sum	 'C19 H20 Cl N O Ru' 
_chemical_formula_weight          414.88

loop_
 _atom_type_symbol
 _atom_type_description
 _atom_type_scat_dispersion_real
 _atom_type_scat_dispersion_imag
 _atom_type_scat_source
 'C'  'C'   0.0033   0.0016
 'International Tables Vol C Tables 4.2.6.8 and 6.1.1.4'
 'H'  'H'   0.0000   0.0000
 'International Tables Vol C Tables 4.2.6.8 and 6.1.1.4'
 'N'  'N'   0.0061   0.0033
 'International Tables Vol C Tables 4.2.6.8 and 6.1.1.4'
 'O'  'O'   0.0106   0.0060
 'International Tables Vol C Tables 4.2.6.8 and 6.1.1.4'
 'Cl'  'Cl'   0.1484   0.1585
 'International Tables Vol C Tables 4.2.6.8 and 6.1.1.4'
 'Ru'  'Ru'  -1.2594   0.8363
 'International Tables Vol C Tables 4.2.6.8 and 6.1.1.4'
 
_space_group_crystal_system       monoclinic
_space_group_IT_number            14
_space_group_name_H-M_alt         'P 21/n'
_space_group_name_Hall            '-P 2yn'
 
_shelx_space_group_comment
;
The symmetry employed for this shelxl refinement is uniquely defined
by the following loop, which should always be used as a source of
symmetry information in preference to the above space-group names.
They are only intended as comments.
;
 
loop_
 _space_group_symop_operation_xyz
 'x, y, z'
 '-x+1/2, y+1/2, -z+1/2'
 '-x, -y, -z'
 'x-1/2, -y-1/2, z-1/2'
 
_cell_length_a                    10.6061(3)
_cell_length_b                    13.2190(4)
_cell_length_c                    12.2796(3)
_cell_angle_alpha                 90
_cell_angle_beta                  102.9890(10)
_cell_angle_gamma                 90
_cell_volume                      1677.57(8)
_cell_formula_units_Z             4
_cell_measurement_temperature     99(2)
_cell_measurement_reflns_used     9889 
_cell_measurement_theta_min        3.211
_cell_measurement_theta_max      27.420 
 
_exptl_crystal_description        'not regular' 
_exptl_crystal_colour             ? 
_exptl_crystal_density_meas       ? 
_exptl_crystal_density_method     ?              
_exptl_crystal_density_diffrn     1.643          
_exptl_crystal_F_000              840
_exptl_transmission_factor_min    ?                                             
_exptl_transmission_factor_max    ?                                             
_exptl_crystal_size_max           0.360
_exptl_crystal_size_mid           0.240
_exptl_crystal_size_min           0.160
_exptl_absorpt_coefficient_mu     1.097
_shelx_estimated_absorpt_T_min    0.693
_shelx_estimated_absorpt_T_max    0.844
_exptl_absorpt_correction_type     multi-scan
_exptl_absorpt_correction_T_min   0.5690 
_exptl_absorpt_correction_T_max   0.7886 
_exptl_absorpt_process_details     '(<i>SADABS</i>; Bruker, 2004)'
 
_exptl_special_details
;
 ?
;
 
_diffrn_ambient_temperature       99(2)
_diffrn_radiation_wavelength      0.71073
_diffrn_radiation_type            MoK\a
_diffrn_source                     'fine-focus sealed tube'
_diffrn_measurement_device_type   'Bruker SMART APEXII CCD'
_diffrn_measurement_method        '\w and \f scans'
_diffrn_detector_area_resol_mean  ? 
_diffrn_reflns_number             19998
_diffrn_reflns_av_unetI/netI      0.0432
_diffrn_reflns_av_R_equivalents   0.0562
_diffrn_reflns_limit_h_min        -13
_diffrn_reflns_limit_h_max        13
_diffrn_reflns_limit_k_min        -17
_diffrn_reflns_limit_k_max        15
_diffrn_reflns_limit_l_min        -15
_diffrn_reflns_limit_l_max        15
_diffrn_reflns_theta_min          2.296
_diffrn_reflns_theta_max          27.497
_diffrn_reflns_theta_full         25.242
_diffrn_measured_fraction_theta_max   0.998
_diffrn_measured_fraction_theta_full  0.997
_diffrn_reflns_Laue_measured_fraction_max    0.998
_diffrn_reflns_Laue_measured_fraction_full   0.997
_diffrn_reflns_point_group_measured_fraction_max   0.998
_diffrn_reflns_point_group_measured_fraction_full  0.997
_reflns_number_total              3848
_reflns_number_gt                 3352
_reflns_threshold_expression      'I > 2\s(I)'
_reflns_Friedel_coverage          0.000
_reflns_Friedel_fraction_max      .
_reflns_Friedel_fraction_full     .
 
_reflns_special_details
;
 Reflections were merged by SHELXL according to the crystal
 class for the calculation of statistics and refinement.
 
 _reflns_Friedel_fraction is defined as the number of unique
 Friedel pairs measured divided by the number that would be
 possible theoretically, ignoring centric projections and
 systematic absences.
;
 
_computing_data_collection        '<i>APEX2</i> (Bruker, 2008)'
_computing_cell_refinement        '<i>SAINT</i> (Bruker, 2008)'
_computing_data_reduction         '<i>SAINT</i> (Bruker, 2008)'
_computing_structure_solution     'SHELXS-97 (Sheldrick, 1990)' 
_computing_structure_refinement   'SHELXL-2013 (Sheldrick, 2013)'
_computing_molecular_graphics     ? 
_computing_publication_material   'SHELXL-2013 (Sheldrick, 2013)' 
 
_refine_special_details
;
 ?
;
_refine_ls_structure_factor_coef  Fsqd
_refine_ls_matrix_type            full
_refine_ls_weighting_scheme       calc
_refine_ls_weighting_details
;
 w=1/[\s^2^(Fo^2^)+(0.0369P)^2^+0.4049P]
 where P=(Fo^2^+2Fc^2^)/3
;
_atom_sites_solution_primary      direct
_atom_sites_solution_secondary    difmap
_atom_sites_solution_hydrogens    geom
_refine_ls_hydrogen_treatment     refxyz
_refine_ls_extinction_method      none
_refine_ls_extinction_coef        .
_refine_ls_number_reflns          3848
_refine_ls_number_parameters      211
_refine_ls_number_restraints      0
_refine_ls_R_factor_all           0.0347
_refine_ls_R_factor_gt            0.0284
_refine_ls_wR_factor_ref          0.0747
_refine_ls_wR_factor_gt           0.0707
_refine_ls_goodness_of_fit_ref    1.041
_refine_ls_restrained_S_all       1.041
_refine_ls_shift/su_max           0.000
_refine_ls_shift/su_mean          0.000
 
loop_
 _atom_site_label
 _atom_site_type_symbol
 _atom_site_fract_x
 _atom_site_fract_y
 _atom_site_fract_z
 _atom_site_U_iso_or_equiv
 _atom_site_adp_type
 _atom_site_occupancy
 _atom_site_site_symmetry_order  
 _atom_site_calc_flag
 _atom_site_refinement_flags_posn
 _atom_site_refinement_flags_adp
 _atom_site_refinement_flags_occupancy
 _atom_site_disorder_assembly
 _atom_site_disorder_group
C1 C 0.1508(2) 0.40622(18) 0.58538(19) 0.0211(5) Uani 1 1 d . . . . .
H1 H 0.1527 0.4036 0.6630 0.025 Uiso 1 1 calc R U . . .
C2 C 0.1673(2) 0.50003(18) 0.5362(2) 0.0233(5) Uani 1 1 d . . . . .
H2 H 0.1794 0.5597 0.5804 0.028 Uiso 1 1 calc R U . . .
C3 C 0.1659(2) 0.50542(18) 0.4247(2) 0.0228(5) Uani 1 1 d . . . . .
H3 H 0.1773 0.5687 0.3914 0.027 Uiso 1 1 calc R U . . .
C4 C 0.1474(2) 0.41663(18) 0.35925(19) 0.0194(5) Uani 1 1 d . . . . .
C5 C 0.1471(2) 0.4123(2) 0.2439(2) 0.0237(5) Uani 1 1 d . . . . .
H5 H 0.1580 0.4722 0.2044 0.028 Uiso 1 1 calc R U . . .
C6 C 0.1309(2) 0.32065(19) 0.1897(2) 0.0243(6) Uani 1 1 d . . . . .
H6 H 0.1326 0.3185 0.1128 0.029 Uiso 1 1 calc R U . . .
C7 C 0.1121(2) 0.23026(19) 0.24347(19) 0.0215(5) Uani 1 1 d . . . . .
H7 H 0.1003 0.1687 0.2026 0.026 Uiso 1 1 calc R U . . .
C8 C 0.1105(2) 0.23023(17) 0.35706(18) 0.0164(4) Uani 1 1 d . . . . .
C9 C 0.1302(2) 0.32489(16) 0.41413(18) 0.0162(5) Uani 1 1 d . . . . .
C10 C 0.2563(2) 0.06878(18) 0.62616(18) 0.0204(5) Uani 1 1 d . . . . .
C11 C 0.1388(2) 0.01639(17) 0.62768(18) 0.0196(5) Uani 1 1 d . . . . .
H11 H 0.1079 -0.0374 0.5707 0.023 Uiso 1 1 calc R U . . .
C12 C 0.0529(2) 0.05511(17) 0.68877(18) 0.0186(5) Uani 1 1 d . . . . .
H12 H -0.0374 0.0279 0.6732 0.022 Uiso 1 1 calc R U . . .
C13 C 0.0806(2) 0.14632(18) 0.75345(18) 0.0172(5) Uani 1 1 d . . . . .
C14 C 0.1987(2) 0.19509(18) 0.75463(18) 0.0179(5) Uani 1 1 d . . . . .
H14 H 0.2123 0.2651 0.7858 0.021 Uiso 1 1 calc R U . . .
C15 C 0.2863(2) 0.15682(18) 0.69153(19) 0.0194(5) Uani 1 1 d . . . . .
H15 H 0.3595 0.2005 0.6808 0.023 Uiso 1 1 calc R U . . .
C16 C 0.3399(3) 0.0338(2) 0.5499(2) 0.0295(6) Uani 1 1 d . . . . .
H16A H 0.3805 0.0924 0.5228 0.044 Uiso 1 1 calc R U . . .
H16B H 0.2867 -0.0024 0.4862 0.044 Uiso 1 1 calc R U . . .
H16C H 0.4073 -0.0116 0.5908 0.044 Uiso 1 1 calc R U . . .
C17 C -0.0176(2) 0.18481(18) 0.81556(19) 0.0212(5) Uani 1 1 d . . . . .
H17 H -0.1056 0.1678 0.7698 0.025 Uiso 1 1 calc R U . . .
C18 C -0.0003(3) 0.1289(2) 0.9270(2) 0.0328(6) Uani 1 1 d . . . . .
H18A H 0.0848 0.1450 0.9742 0.049 Uiso 1 1 calc R U . . .
H18B H -0.0066 0.0558 0.9133 0.049 Uiso 1 1 calc R U . . .
H18C H -0.0680 0.1500 0.9649 0.049 Uiso 1 1 calc R U . . .
C19 C -0.0122(3) 0.2987(2) 0.8333(2) 0.0319(6) Uani 1 1 d . . . . .
H19A H 0.0690 0.3167 0.8855 0.048 Uiso 1 1 calc R U . . .
H19B H -0.0854 0.3201 0.8642 0.048 Uiso 1 1 calc R U . . .
H19C H -0.0166 0.3328 0.7616 0.048 Uiso 1 1 calc R U . . .
N1 N 0.13273(19) 0.32129(13) 0.52629(16) 0.0165(4) Uani 1 1 d . . . . .
O1 O 0.09428(16) 0.14877(12) 0.41371(13) 0.0187(3) Uani 1 1 d . . . . .
Cl1 Cl -0.12773(5) 0.22319(4) 0.51989(4) 0.01852(13) Uani 1 1 d . . . . .
Ru1 Ru 0.09800(2) 0.17588(2) 0.58098(2) 0.01382(8) Uani 1 1 d . . . . .
 
loop_
 _atom_site_aniso_label
 _atom_site_aniso_U_11
 _atom_site_aniso_U_22
 _atom_site_aniso_U_33
 _atom_site_aniso_U_23
 _atom_site_aniso_U_13
 _atom_site_aniso_U_12
C1 0.0249(12) 0.0185(12) 0.0189(11) -0.0033(9) 0.0029(9) -0.0022(10)
C2 0.0251(13) 0.0175(12) 0.0257(12) -0.0017(10) 0.0025(10) -0.0030(10)
C3 0.0199(12) 0.0178(12) 0.0300(13) 0.0034(10) 0.0039(10) -0.0025(10)
C4 0.0152(11) 0.0204(12) 0.0220(11) 0.0055(9) 0.0030(9) -0.0004(9)
C5 0.0208(12) 0.0290(14) 0.0222(12) 0.0084(10) 0.0069(10) 0.0004(10)
C6 0.0216(13) 0.0364(16) 0.0161(11) 0.0044(10) 0.0064(10) 0.0045(10)
C7 0.0214(12) 0.0259(13) 0.0174(11) -0.0023(10) 0.0047(9) 0.0034(10)
C8 0.0132(10) 0.0172(11) 0.0178(10) 0.0001(9) 0.0013(8) 0.0008(9)
C9 0.0127(10) 0.0206(13) 0.0144(11) 0.0023(8) 0.0012(8) 0.0004(8)
C10 0.0214(12) 0.0216(12) 0.0169(11) 0.0055(9) 0.0013(9) 0.0070(10)
C11 0.0269(12) 0.0143(11) 0.0145(10) 0.0024(9) -0.0015(9) 0.0007(10)
C12 0.0224(12) 0.0160(12) 0.0152(10) 0.0045(9) -0.0005(9) -0.0028(9)
C13 0.0204(11) 0.0182(11) 0.0117(10) 0.0036(9) 0.0011(9) 0.0013(10)
C14 0.0191(11) 0.0183(11) 0.0135(10) 0.0011(9) -0.0020(9) -0.0015(9)
C15 0.0160(11) 0.0230(12) 0.0168(11) 0.0034(9) -0.0009(9) -0.0005(9)
C16 0.0310(14) 0.0311(15) 0.0274(13) 0.0011(11) 0.0084(11) 0.0098(12)
C17 0.0194(12) 0.0272(14) 0.0166(11) -0.0010(9) 0.0032(9) 0.0012(10)
C18 0.0334(15) 0.0442(17) 0.0234(13) 0.0099(12) 0.0117(11) 0.0065(13)
C19 0.0388(15) 0.0308(15) 0.0285(14) -0.0028(12) 0.0124(12) 0.0067(12)
N1 0.0171(10) 0.0163(10) 0.0149(9) 0.0002(7) 0.0013(8) -0.0014(7)
O1 0.0258(9) 0.0163(8) 0.0130(7) -0.0015(6) 0.0021(7) -0.0002(7)
Cl1 0.0180(3) 0.0182(3) 0.0176(3) 0.0003(2) 0.0003(2) 0.0010(2)
Ru1 0.01653(11) 0.01234(12) 0.01139(11) -0.00017(6) 0.00058(7) -0.00106(7)
 
_geom_special_details
;
 All esds (except the esd in the dihedral angle between two l.s. planes)
 are estimated using the full covariance matrix.  The cell esds are taken
 into account individually in the estimation of esds in distances, angles
 and torsion angles; correlations between esds in cell parameters are only
 used when they are defined by crystal symmetry.  An approximate (isotropic)
 treatment of cell esds is used for estimating esds involving l.s. planes.
;
 
loop_
 _geom_bond_atom_site_label_1
 _geom_bond_atom_site_label_2
 _geom_bond_distance
 _geom_bond_site_symmetry_2
 _geom_bond_publ_flag
C1 N1 1.327(3) . ?
C1 C2 1.408(3) . ?
C1 H1 0.9500 . ?
C2 C3 1.368(3) . ?
C2 H2 0.9500 . ?
C3 C4 1.411(3) . ?
C3 H3 0.9500 . ?
C4 C5 1.417(3) . ?
C4 C9 1.419(3) . ?
C5 C6 1.374(4) . ?
C5 H5 0.9500 . ?
C6 C7 1.401(3) . ?
C6 H6 0.9500 . ?
C7 C8 1.399(3) . ?
C7 H7 0.9500 . ?
C8 O1 1.314(3) . ?
C8 C9 1.426(3) . ?
C9 N1 1.372(3) . ?
C10 C15 1.409(3) . ?
C10 C11 1.430(3) . ?
C10 C16 1.501(3) . ?
C10 Ru1 2.171(2) . ?
C11 C12 1.400(3) . ?
C11 Ru1 2.202(2) . ?
C11 H11 1.0000 . ?
C12 C13 1.437(3) . ?
C12 Ru1 2.194(2) . ?
C12 H12 1.0000 . ?
C13 C14 1.406(3) . ?
C13 C17 1.511(3) . ?
C13 Ru1 2.202(2) . ?
C14 C15 1.429(3) . ?
C14 Ru1 2.175(2) . ?
C14 H14 1.0000 . ?
C15 Ru1 2.162(2) . ?
C15 H15 1.0000 . ?
C16 H16A 0.9800 . ?
C16 H16B 0.9800 . ?
C16 H16C 0.9800 . ?
C17 C19 1.521(4) . ?
C17 C18 1.529(3) . ?
C17 H17 1.0000 . ?
C18 H18A 0.9800 . ?
C18 H18B 0.9800 . ?
C18 H18C 0.9800 . ?
C19 H19A 0.9800 . ?
C19 H19B 0.9800 . ?
C19 H19C 0.9800 . ?
N1 Ru1 2.0958(18) . ?
O1 Ru1 2.0766(15) . ?
Cl1 Ru1 2.4245(6) . ?
 
loop_
 _geom_angle_atom_site_label_1
 _geom_angle_atom_site_label_2
 _geom_angle_atom_site_label_3
 _geom_angle
 _geom_angle_site_symmetry_1
 _geom_angle_site_symmetry_3
 _geom_angle_publ_flag
N1 C1 C2 121.8(2) . . ?
N1 C1 H1 119.1 . . ?
C2 C1 H1 119.1 . . ?
C3 C2 C1 120.1(2) . . ?
C3 C2 H2 120.0 . . ?
C1 C2 H2 120.0 . . ?
C2 C3 C4 119.7(2) . . ?
C2 C3 H3 120.2 . . ?
C4 C3 H3 120.2 . . ?
C3 C4 C5 124.9(2) . . ?
C3 C4 C9 117.2(2) . . ?
C5 C4 C9 117.9(2) . . ?
C6 C5 C4 119.4(2) . . ?
C6 C5 H5 120.3 . . ?
C4 C5 H5 120.3 . . ?
C5 C6 C7 122.7(2) . . ?
C5 C6 H6 118.7 . . ?
C7 C6 H6 118.7 . . ?
C8 C7 C6 120.3(2) . . ?
C8 C7 H7 119.8 . . ?
C6 C7 H7 119.8 . . ?
O1 C8 C7 124.1(2) . . ?
O1 C8 C9 118.75(19) . . ?
C7 C8 C9 117.1(2) . . ?
N1 C9 C4 122.1(2) . . ?
N1 C9 C8 115.48(19) . . ?
C4 C9 C8 122.5(2) . . ?
C15 C10 C11 118.6(2) . . ?
C15 C10 C16 121.4(2) . . ?
C11 C10 C16 119.9(2) . . ?
C15 C10 Ru1 70.69(13) . . ?
C11 C10 Ru1 72.10(13) . . ?
C16 C10 Ru1 124.97(16) . . ?
C12 C11 C10 120.3(2) . . ?
C12 C11 Ru1 71.12(13) . . ?
C10 C11 Ru1 69.73(13) . . ?
C12 C11 H11 119.0 . . ?
C10 C11 H11 119.0 . . ?
Ru1 C11 H11 119.0 . . ?
C11 C12 C13 121.7(2) . . ?
C11 C12 Ru1 71.73(13) . . ?
C13 C12 Ru1 71.20(12) . . ?
C11 C12 H12 118.4 . . ?
C13 C12 H12 118.4 . . ?
Ru1 C12 H12 118.4 . . ?
C14 C13 C12 117.5(2) . . ?
C14 C13 C17 123.7(2) . . ?
C12 C13 C17 118.9(2) . . ?
C14 C13 Ru1 70.22(12) . . ?
C12 C13 Ru1 70.63(12) . . ?
C17 C13 Ru1 129.94(16) . . ?
C13 C14 C15 121.2(2) . . ?
C13 C14 Ru1 72.32(13) . . ?
C15 C14 Ru1 70.29(13) . . ?
C13 C14 H14 118.7 . . ?
C15 C14 H14 118.7 . . ?
Ru1 C14 H14 118.7 . . ?
C10 C15 C14 120.7(2) . . ?
C10 C15 Ru1 71.36(13) . . ?
C14 C15 Ru1 71.23(13) . . ?
C10 C15 H15 119.0 . . ?
C14 C15 H15 119.0 . . ?
Ru1 C15 H15 119.0 . . ?
C10 C16 H16A 109.5 . . ?
C10 C16 H16B 109.5 . . ?
H16A C16 H16B 109.5 . . ?
C10 C16 H16C 109.5 . . ?
H16A C16 H16C 109.5 . . ?
H16B C16 H16C 109.5 . . ?
C13 C17 C19 113.4(2) . . ?
C13 C17 C18 109.32(19) . . ?
C19 C17 C18 111.0(2) . . ?
C13 C17 H17 107.6 . . ?
C19 C17 H17 107.6 . . ?
C18 C17 H17 107.6 . . ?
C17 C18 H18A 109.5 . . ?
C17 C18 H18B 109.5 . . ?
H18A C18 H18B 109.5 . . ?
C17 C18 H18C 109.5 . . ?
H18A C18 H18C 109.5 . . ?
H18B C18 H18C 109.5 . . ?
C17 C19 H19A 109.5 . . ?
C17 C19 H19B 109.5 . . ?
H19A C19 H19B 109.5 . . ?
C17 C19 H19C 109.5 . . ?
H19A C19 H19C 109.5 . . ?
H19B C19 H19C 109.5 . . ?
C1 N1 C9 119.16(19) . . ?
C1 N1 Ru1 127.94(16) . . ?
C9 N1 Ru1 112.85(14) . . ?
C8 O1 Ru1 113.99(14) . . ?
O1 Ru1 N1 78.87(7) . . ?
O1 Ru1 C15 114.24(8) . . ?
N1 Ru1 C15 95.97(8) . . ?
O1 Ru1 C10 88.97(7) . . ?
N1 Ru1 C10 119.90(8) . . ?
C15 Ru1 C10 37.95(9) . . ?
O1 Ru1 C14 152.38(8) . . ?
N1 Ru1 C14 97.13(8) . . ?
C15 Ru1 C14 38.48(8) . . ?
C10 Ru1 C14 69.16(9) . . ?
O1 Ru1 C12 120.86(8) . . ?
N1 Ru1 C12 159.79(8) . . ?
C15 Ru1 C12 80.34(9) . . ?
C10 Ru1 C12 68.43(9) . . ?
C14 Ru1 C12 67.61(8) . . ?
O1 Ru1 C13 159.02(8) . . ?
N1 Ru1 C13 121.99(8) . . ?
C15 Ru1 C13 68.93(9) . . ?
C10 Ru1 C13 82.27(8) . . ?
C14 Ru1 C13 37.46(9) . . ?
C12 Ru1 C13 38.17(9) . . ?
O1 Ru1 C11 92.94(7) . . ?
N1 Ru1 C11 157.39(8) . . ?
C15 Ru1 C11 68.00(9) . . ?
C10 Ru1 C11 38.17(9) . . ?
C14 Ru1 C11 80.33(8) . . ?
C12 Ru1 C11 37.15(8) . . ?
C13 Ru1 C11 68.50(9) . . ?
O1 Ru1 Cl1 86.59(5) . . ?
N1 Ru1 Cl1 84.07(6) . . ?
C15 Ru1 Cl1 158.85(6) . . ?
C10 Ru1 Cl1 154.23(7) . . ?
C14 Ru1 Cl1 120.43(6) . . ?
C12 Ru1 Cl1 92.31(6) . . ?
C13 Ru1 Cl1 93.04(6) . . ?
C11 Ru1 Cl1 116.74(6) . . ?
 
_refine_diff_density_max    0.585
_refine_diff_density_min   -0.713
_refine_diff_density_rms    0.093

_shelxl_version_number 2013-2

_shelx_res_file
;
TITL MaKu146a_0m in P2(1)/n
CELL  0.71073  10.6061  13.2190  12.2796   90.000  102.989   90.000
ZERR     4.00   0.0003   0.0004   0.0003    0.000    0.001    0.000
LATT   1
SYMM  1/2 - X, 1/2 + Y, 1/2 - Z
SFAC  C    H    N    O    CL   RU
UNIT  76 80 4 4 4 4
MERG   2
OMIT     0   2   0
OMIT     5   0   1
OMIT    -1   1   3
OMIT    4   0   2
OMIT     3   0   1
OMIT -2 55
FMAP   2
PLAN   10
SIZE     0.160   0.240   0.360
ACTA
BOND   $H
L.S.  10
TEMP  -174.00
WGHT    0.036900    0.404900
FVAR       0.12105
C1    1    0.150796    0.406216    0.585381    11.00000    0.02490    0.01849 =
         0.01888   -0.00329    0.00287   -0.00225
AFIX  43
H1    2    0.152654    0.403626    0.663039    11.00000   -1.20000
AFIX   0
C2    1    0.167276    0.500031    0.536155    11.00000    0.02513    0.01749 =
         0.02568   -0.00170    0.00251   -0.00297
AFIX  43
H2    2    0.179385    0.559681    0.580434    11.00000   -1.20000
AFIX   0
C3    1    0.165878    0.505424    0.424653    11.00000    0.01988    0.01777 =
         0.02997    0.00338    0.00392   -0.00253
AFIX  43
H3    2    0.177281    0.568669    0.391402    11.00000   -1.20000
AFIX   0
C4    1    0.147422    0.416628    0.359252    11.00000    0.01522    0.02041 =
         0.02204    0.00550    0.00302   -0.00045
C5    1    0.147096    0.412291    0.243922    11.00000    0.02077    0.02904 =
         0.02218    0.00842    0.00685    0.00045
AFIX  43
H5    2    0.157973    0.472241    0.204361    11.00000   -1.20000
AFIX   0
C6    1    0.130917    0.320648    0.189747    11.00000    0.02161    0.03637 =
         0.01610    0.00438    0.00644    0.00452
AFIX  43
H6    2    0.132575    0.318509    0.112751    11.00000   -1.20000
AFIX   0
C7    1    0.112079    0.230256    0.243469    11.00000    0.02144    0.02585 =
         0.01745   -0.00232    0.00473    0.00339
AFIX  43
H7    2    0.100334    0.168672    0.202558    11.00000   -1.20000
AFIX   0
C8    1    0.110476    0.230230    0.357060    11.00000    0.01324    0.01720 =
         0.01779    0.00007    0.00134    0.00080
C9    1    0.130228    0.324893    0.414129    11.00000    0.01267    0.02055 =
         0.01438    0.00226    0.00120    0.00038
C10   1    0.256308    0.068781    0.626163    11.00000    0.02145    0.02156 =
         0.01687    0.00550    0.00130    0.00704
C11   1    0.138760    0.016388    0.627677    11.00000    0.02691    0.01434 =
         0.01451    0.00242   -0.00145    0.00070
AFIX  13
H11   2    0.107895   -0.037439    0.570700    11.00000   -1.20000
AFIX   0
C12   1    0.052891    0.055107    0.688771    11.00000    0.02239    0.01595 =
         0.01519    0.00448   -0.00048   -0.00280
AFIX  13
H12   2   -0.037352    0.027871    0.673215    11.00000   -1.20000
AFIX   0
C13   1    0.080637    0.146319    0.753454    11.00000    0.02040    0.01816 =
         0.01171    0.00361    0.00108    0.00127
C14   1    0.198712    0.195085    0.754631    11.00000    0.01906    0.01831 =
         0.01350    0.00106   -0.00204   -0.00146
AFIX  13
H14   2    0.212291    0.265145    0.785784    11.00000   -1.20000
AFIX   0
C15   1    0.286256    0.156818    0.691531    11.00000    0.01603    0.02304 =
         0.01685    0.00344   -0.00090   -0.00046
AFIX  13
H15   2    0.359462    0.200543    0.680839    11.00000   -1.20000
AFIX   0
C16   1    0.339941    0.033782    0.549852    11.00000    0.03102    0.03107 =
         0.02739    0.00113    0.00837    0.00984
AFIX 137
H16A  2    0.380457    0.092444    0.522810    11.00000   -1.50000
H16B  2    0.286712   -0.002377    0.486160    11.00000   -1.50000
H16C  2    0.407264   -0.011574    0.590758    11.00000   -1.50000
AFIX   0
C17   1   -0.017618    0.184813    0.815565    11.00000    0.01937    0.02724 =
         0.01656   -0.00100    0.00317    0.00123
AFIX  13
H17   2   -0.105558    0.167844    0.769850    11.00000   -1.20000
AFIX   0
C18   1   -0.000293    0.128887    0.926988    11.00000    0.03343    0.04418 =
         0.02343    0.00985    0.01173    0.00645
AFIX 137
H18A  2    0.084807    0.144979    0.974159    11.00000   -1.50000
H18B  2   -0.006584    0.055823    0.913324    11.00000   -1.50000
H18C  2   -0.068002    0.150025    0.964874    11.00000   -1.50000
AFIX   0
C19   1   -0.012163    0.298731    0.833283    11.00000    0.03876    0.03083 =
         0.02850   -0.00276    0.01242    0.00673
AFIX 137
H19A  2    0.069023    0.316717    0.885453    11.00000   -1.50000
H19B  2   -0.085417    0.320135    0.864199    11.00000   -1.50000
H19C  2   -0.016581    0.332752    0.761615    11.00000   -1.50000
AFIX   0
N1    3    0.132735    0.321286    0.526289    11.00000    0.01712    0.01626 =
         0.01492    0.00016    0.00127   -0.00142
O1    4    0.094280    0.148773    0.413712    11.00000    0.02585    0.01628 =
         0.01298   -0.00148    0.00212   -0.00016
CL1   5   -0.127726    0.223192    0.519894    11.00000    0.01804    0.01825 =
         0.01755    0.00034    0.00034    0.00096
RU1   6    0.097999    0.175878    0.580977    11.00000    0.01653    0.01234 =
         0.01139   -0.00017    0.00058   -0.00106
HKLF    4

REM  MaKu146a_0m in P2(1)/n
REM R1 =  0.0284 for    3352 Fo > 4sig(Fo)  and  0.0347 for all    3848 data
REM    211 parameters refined using      0 restraints

END

WGHT      0.0293      0.8407

REM Highest difference peak  0.585,  deepest hole -0.713,  1-sigma level  0.093
Q1    1   0.1440  0.2238  0.6490  11.00000  0.05    0.58
Q2    1   0.1382  0.1331  0.6451  11.00000  0.05    0.51
Q3    1   0.1378  0.3781  0.3811  11.00000  0.05    0.42
Q4    1   0.0753  0.1016  0.7204  11.00000  0.05    0.42
Q5    1   0.0397  0.1567  0.7844  11.00000  0.05    0.41
Q6    1   0.1305  0.2240  0.3029  11.00000  0.05    0.40
Q7    1   0.2204  0.0367  0.6408  11.00000  0.05    0.39
Q8    1   0.1207  0.4152  0.2960  11.00000  0.05    0.39
Q9    1   0.0571  0.1117  0.5198  11.00000  0.05    0.39
Q10   1   0.1371  0.3266  0.4689  11.00000  0.05    0.37
;
_shelx_res_checksum   43301

_shelx_hkl_file
;
  -1   0   0   -0.07    0.05
   1   0   0    0.01    0.03
   1   0   0   -0.02    0.03
   1   0   0   -0.05    0.04
  -1   0   0   -0.02    0.03
   2   0   0   42.12    2.63
   2   0   0   40.81    2.65
  -2   0   0   38.48    2.61
  -2   0   0   36.15    2.56
   2   0   0   38.97    2.56
  -3   0   0   -0.09    0.10
   3   0   0   -0.15    0.06
  -3   0   0    0.09    0.14
   3   0   0   -0.07    0.11
   3   0   0   -0.05    0.14
  -3   0   0   -0.08    0.10
   3   0   0   -0.04    0.07
   4   0   0  991.33   61.48
   4   0   0  941.14   61.42
   4   0   0  994.33   57.10
   4   0   0 1000.00   60.41
  -4   0   0  941.56   57.05
   5   0   0    0.07    0.15
  -5   0   0   -0.23    0.17
   5   0   0   -0.17    0.10
   5   0   0   -0.05    0.08
   5   0   0   -0.17    0.16
  -5   0   0    0.02    0.18
  -6   0   0   27.51    2.27
  -6   0   0   30.39    2.04
   6   0   0   29.04    2.08
   6   0   0   30.31    1.87
  -6   0   0   23.79    2.15
   6   0   0   29.74    2.03
   7   0   0    0.09    0.21
  -7   0   0   -0.05    0.32
  -7   0   0    0.00    0.22
  -8   0   0  100.08    7.22
   8   0   0  102.59    6.52
  -9   0   0    0.26    0.36
   9   0   0    0.49    0.35
 -10   0   0   38.45    3.28
  10   0   0   37.94    2.95
 -11   0   0    0.21    0.43
  11   0   0   -0.32    0.32
  12   0   0    0.40    0.50
 -12   0   0    0.48    0.45
 -13   0   0    0.03    0.72
  13   0   0   -0.39    0.37
   0  -1   0   -0.16    0.05
   0   1   0   -0.07    0.06
   1  -1   0   53.34    3.25
  -1  -1   0   46.34    3.26
  -1  -1   0   47.81    3.32
   1   1   0   54.32    3.32
   1   1   0   56.31    3.28
   2  -1   0  791.48   50.43
   2   1   0  852.37   51.26
   2   1   0  794.61   50.45
  -3  -1   0  146.69   10.86
   3  -1   0  173.01   10.80
  -3  -1   0  179.28   10.16
   3  -1   0  176.13   10.18
   3  -1   0  164.07   10.63
   3   1   0  184.25   10.69
  -3   1   0  176.74   10.17
   3   1   0  167.72   10.88
   4  -1   0   94.57    6.00
  -4  -1   0   88.77    5.93
   4  -1   0   91.65    6.03
   4  -1   0   91.99    5.75
   4  -1   0   93.41    5.87
  -4  -1   0   91.91    5.72
  -4  -1   0   97.09    6.05
   4   1   0   97.31    5.77
  -4   1   0   98.48    5.74
   4   1   0   93.59    5.92
   5  -1   0  101.00    6.70
   5  -1   0   99.26    6.38
  -5  -1   0  104.63    7.08
   5  -1   0  102.33    6.48
  -5  -1   0   99.16    6.54
  -5  -1   0  106.78    7.13
  -5  -1   0  112.53    6.68
   5  -1   0  108.74    6.67
   5   1   0  102.88    6.54
   5   1   0  105.06    6.41
  -5   1   0   91.71    7.06
  -5   1   0  105.01    6.35
   6  -1   0   87.32    5.42
  -6  -1   0   80.26    5.81
   6  -1   0   79.38    5.48
  -6  -1   0   96.62    5.31
   6  -1   0   85.07    5.21
  -6  -1   0   88.76    5.84
   6  -1   0   77.19    5.24
  -6   1   0   82.42    5.85
  -6   1   0   67.54    5.70
   6   1   0   87.24    5.29
   6   1   0   73.20    5.23
  -6   1   0   85.78    5.22
  -7  -1   0   32.45    2.29
  -7  -1   0   35.98    2.65
   7  -1   0   36.08    2.48
  -7  -1   0   32.92    2.70
   7  -1   0   37.17    2.50
  -7   1   0   35.39    2.76
  -7   1   0   30.29    2.54
   7   1   0   34.20    2.48
  -8  -1   0  102.82    6.90
   8  -1   0   98.06    6.46
  -8  -1   0   80.61    6.72
   8  -1   0  100.35    6.21
   8   1   0  100.96    6.24
  -8   1   0   98.24    6.90
   9  -1   0   24.57    2.17
  -9  -1   0   27.50    2.41
   9   1   0   27.30    2.22
  -9   1   0   29.22    2.51
  10  -1   0    5.39    0.98
 -10  -1   0    7.76    1.25
  10   1   0    7.77    1.16
 -10   1   0    8.21    1.34
 -11  -1   0   12.66    1.86
  11  -1   0   13.94    1.77
  11   1   0   14.56    1.78
 -11   1   0   15.44    2.02
 -12  -1   0   25.53    2.56
  12  -1   0   25.92    2.30
 -12   1   0   23.16    2.77
  12   1   0   19.54    2.37
  13  -1   0    3.80    1.03
 -13  -1   0    2.15    0.88
  13   1   0    3.47    1.10
 -13   1   0    2.59    1.06
   0   2   0  164.80   10.32
  -1  -2   0   58.77    4.39
   1  -2   0   76.75    4.39
  -1  -2   0   70.39    4.45
   1   2   0   81.41    4.42
  -1   2   0   59.97    4.38
   2  -2   0  109.98    6.77
  -2  -2   0   97.66    6.90
   2   2   0  116.02    6.82
   3  -2   0   97.22    6.19
  -3  -2   0  100.38    6.37
   3  -2   0   99.25    5.97
  -3  -2   0   91.77    6.25
   3   2   0  104.09    6.26
  -3   2   0   96.36    5.95
   3   2   0  101.55    5.99
   4  -2   0  146.04    8.93
   4  -2   0  144.78    9.03
  -4  -2   0  130.63    9.16
   4  -2   0  144.32    8.92
  -4  -2   0  132.96    9.70
   4  -2   0  144.76    9.03
   4  -2   0  145.57    8.61
  -4  -2   0  130.51    9.00
   4   2   0  154.06    9.01
   4   2   0  151.89    8.65
  -4   2   0  145.48    8.58
   5  -2   0  111.45    6.84
   5  -2   0  112.22    6.97
  -5  -2   0  104.41    7.41
   5  -2   0  109.76    6.83
  -5  -2   0  111.42    7.52
  -5  -2   0  114.09    7.09
  -5  -2   0  100.19    6.93
   5  -2   0  109.46    6.71
   5  -2   0  105.68    7.00
  -5   2   0  109.31    7.48
   5   2   0  113.71    6.75
   5   2   0  107.44    6.93
  -5   2   0  109.90    6.68
  -6  -2   0   94.38    6.51
   6  -2   0   90.40    5.83
   6  -2   0   93.80    6.01
   6  -2   0   95.53    5.83
  -6  -2   0   87.75    6.43
  -6  -2   0   85.17    6.06
   6  -2   0   88.75    6.05
   6  -2   0   92.08    5.82
  -6  -2   0   97.59    5.97
  -6   2   0   93.57    5.79
   6   2   0   98.34    5.89
  -6   2   0   86.88    6.48
   6   2   0  101.14    5.95
  -7  -2   0   72.96    5.05
  -7  -2   0   69.07    5.04
   7  -2   0   68.62    4.56
   7  -2   0   71.81    4.69
  -7  -2   0   64.47    4.54
  -7   2   0   69.46    5.11
   7   2   0   71.19    4.61
  -7   2   0   72.39    4.52
  -8  -2   0   41.48    3.58
  -8  -2   0   53.10    3.71
   8  -2   0   47.88    3.35
   8  -2   0   48.02    3.33
  -8   2   0   48.20    3.74
   8   2   0   46.70    3.35
  -9  -2   0   91.33    6.79
   9  -2   0   94.36    6.38
   9  -2   0   92.97    6.16
   9   2   0   98.99    6.23
  -9   2   0   93.29    6.89
 -10  -2   0   66.84    5.30
  10  -2   0   71.57    4.84
 -10   2   0   73.61    5.45
  10   2   0   67.73    4.85
 -11  -2   0    7.57    1.29
  11  -2   0    6.65    1.17
  11   2   0    7.31    1.30
 -11   2   0    6.31    1.25
 -12  -2   0    4.51    1.15
  12  -2   0    4.20    0.99
 -12   2   0    5.56    1.32
  12   2   0    4.73    1.10
  13  -2   0   36.82    3.09
 -13  -2   0   35.91    3.39
  13   2   0   27.07    3.19
 -13   2   0   38.30    3.52
   0  -3   0   -0.28    0.15
   0   3   0   -0.47    0.21
  -2  -3   0   15.73    1.53
   2  -3   0   19.68    1.36
  -2  -3   0   22.80    1.40
  -2  -3   0   19.37    1.41
   2   3   0   19.87    1.41
  -2   3   0   20.62    1.39
  -3  -3   0   32.74    2.43
  -3  -3   0   35.68    2.68
   3  -3   0   37.92    2.34
   3  -3   0   36.03    2.38
  -3  -3   0   39.36    2.50
   3   3   0   38.12    2.45
  -3   3   0   36.93    2.33
  -3   3   0   37.72    2.42
   3   3   0   32.79    2.34
   4  -3   0    0.29    0.21
  -4  -3   0    0.02    0.24
   4  -3   0    0.33    0.12
  -4  -3   0    0.95    0.26
  -4  -3   0    0.23    0.26
   4   3   0   -0.22    0.16
  -4   3   0    0.10    0.26
  -4   3   0    0.11    0.16
   4   3   0    0.06    0.14
   5  -3   0  172.73   10.61
  -5  -3   0  162.21   10.80
  -5  -3   0  168.18   11.22
   5  -3   0  167.72   10.50
   5  -3   0  172.18   10.13
  -5  -3   0  169.98   10.62
  -5  -3   0  160.73   11.44
   5  -3   0  167.98   10.49
   5  -3   0  176.08   10.60
   5   3   0  165.69   10.16
  -5   3   0  169.33   10.10
  -5   3   0  152.45   11.26
  -6  -3   0    5.22    0.68
   6  -3   0    4.78    0.67
   6  -3   0    3.90    0.43
  -6  -3   0    5.11    0.58
  -6  -3   0    6.24    0.83
  -6  -3   0    4.03    0.67
   6  -3   0    4.83    0.39
   6  -3   0    4.59    0.41
   6  -3   0    4.64    0.39
  -6   3   0    4.01    0.75
  -6   3   0    3.61    0.60
   6   3   0    5.20    0.73
  -7  -3   0   27.64    2.24
  -7  -3   0   22.91    1.91
  -7  -3   0   30.91    2.31
   7  -3   0   27.94    1.96
   7  -3   0   26.67    2.04
  -7   3   0   26.98    2.33
   7   3   0   29.40    2.13
  -7   3   0   28.76    2.03
  -8  -3   0   29.18    2.36
   8  -3   0   26.29    2.10
   8  -3   0   26.57    2.02
  -8  -3   0   23.93    2.25
   8   3   0   28.78    2.20
  -8   3   0   28.58    2.46
   9  -3   0   29.20    2.36
  -9  -3   0   25.28    2.51
  -9  -3   0   32.29    2.62
   9  -3   0   30.79    2.30
  -9   3   0   31.55    2.74
   9   3   0   30.49    2.44
  10  -3   0    1.22    0.45
  10  -3   0    1.55    0.59
 -10  -3   0    1.29    0.53
  10   3   0    2.06    0.64
 -11  -3   0   89.03    6.40
  11  -3   0   83.40    5.75
  11  -3   0   81.69    5.88
  11   3   0   77.75    5.78
 -11   3   0   89.41    6.56
 -12  -3   0    7.36    1.42
  12  -3   0    9.80    1.48
 -12   3   0    5.45    1.37
  12   3   0    8.23    1.43
  13  -3   0    0.41    0.63
 -13  -3   0   -0.01    0.43
  13   3   0    0.35    0.69
 -13   3   0    0.55    0.74
   0  -4   0    0.80    0.24
   0   4   0    0.48    0.34
  -1  -4   0   43.23    2.96
  -1  -4   0   44.87    3.20
   1  -4   0   47.12    2.98
  -1  -4   0   44.87    2.99
   1   4   0   48.90    3.03
  -1   4   0   40.95    2.98
  -2  -4   0   22.80    1.95
  -2  -4   0   30.60    1.81
   2  -4   0   24.86    1.77
  -2  -4   0   23.17    1.78
  -2   4   0   27.63    1.83
   3  -4   0  133.21    8.70
  -3  -4   0  132.84    8.88
  -3  -4   0  145.04    8.79
   3  -4   0  139.03    8.24
  -3  -4   0  133.52    9.41
  -3   4   0  136.99    8.23
   3   4   0  143.15    8.30
   4  -4   0    4.52    0.56
  -4  -4   0    4.89    0.70
  -4  -4   0    4.97    0.59
   4  -4   0    4.30    0.44
  -4  -4   0    5.36    0.63
  -4   4   0    3.91    0.52
  -4   4   0    4.18    0.66
   4   4   0    4.92    0.64
  -4   4   0    4.94    0.59
  -5  -4   0    7.32    0.93
   5  -4   0    7.37    0.59
  -5  -4   0    6.95    0.79
  -5  -4   0    5.35    0.75
  -5  -4   0    6.39    0.74
   5  -4   0    8.96    0.77
  -5   4   0    8.44    1.03
  -5   4   0    5.95    0.73
   5   4   0    6.21    0.81
  -6  -4   0   36.42    2.44
   6  -4   0   28.74    1.98
  -6  -4   0   24.98    2.18
   6  -4   0   29.96    1.97
  -6  -4   0   31.58    2.15
   6  -4   0   29.15    1.95
   6  -4   0   28.56    2.12
  -6  -4   0   28.89    2.30
  -6   4   0   28.84    2.08
  -6   4   0   31.02    2.45
   6   4   0   30.52    2.20
   7  -4   0   56.94    3.81
  -7  -4   0   51.02    3.80
  -7  -4   0   61.14    4.30
   7  -4   0   56.86    3.78
  -7  -4   0   56.67    4.17
  -7   4   0   58.09    3.77
   7   4   0   61.53    3.91
  -7   4   0   56.04    4.31
  -8  -4   0    1.24    0.54
   8  -4   0    1.06    0.29
  -8  -4   0    1.01    0.44
   8  -4   0    1.36    0.49
  -8   4   0    2.18    0.69
   8   4   0    0.48    0.38
   9  -4   0   96.91    6.58
  -9  -4   0   93.66    7.02
  -9  -4   0  104.36    7.19
   9  -4   0  105.05    6.46
  -9   4   0  106.40    7.30
   9   4   0   86.48    6.40
  10  -4   0    8.53    1.20
 -10  -4   0    7.73    1.25
  10  -4   0    6.73    0.97
  10   4   0    6.85    1.18
 -10   4   0    8.96    1.42
 -11  -4   0    9.33    1.50
  11  -4   0    7.02    1.05
  11  -4   0    6.19    1.12
 -11   4   0    7.28    1.39
  11   4   0    8.19    1.34
  12  -4   0    4.72    1.10
 -12  -4   0    5.28    1.21
 -12   4   0    7.38    1.47
  12   4   0    6.39    1.24
  13  -4   0   36.24    3.23
 -13  -4   0   43.24    3.64
  13   4   0   33.86    3.27
 -13   4   0   38.70    3.73
   0  -5   0   -0.09    0.13
   0  -5   0    0.02    0.08
   0  -5   0    0.38    0.19
  -1  -5   0  127.54    7.66
   1  -5   0  127.97    8.14
  -1  -5   0  106.72    7.65
   1  -5   0  122.23    7.62
  -1  -5   0  122.24    8.18
  -1   5   0  110.54    8.12
  -2  -5   0  270.92   16.76
   2  -5   0  250.55   15.58
  -2  -5   0  247.27   15.63
   2  -5   0  253.59   16.65
  -2   5   0  218.49   16.64
  -3  -5   0   51.73    3.35
   3  -5   0   47.51    3.25
   3  -5   0   49.19    3.07
  -3  -5   0   46.38    3.33
  -3  -5   0   45.87    3.58
   3   5   0   53.91    3.15
   4  -5   0   36.95    2.48
  -4  -5   0   39.50    2.70
  -4  -5   0   39.50    2.68
   4  -5   0   37.24    2.57
  -4  -5   0   37.04    2.92
  -4   5   0   36.47    2.84
  -4   5   0   39.16    2.49
   4   5   0   39.69    2.57
   5  -5   0  128.71    8.06
  -5  -5   0  136.06    8.68
  -5  -5   0  139.28    8.56
   5  -5   0  136.15    8.41
  -5  -5   0  131.70    9.21
  -5   5   0  140.24    8.07
  -5   5   0  134.23    9.06
   5   5   0  132.66    8.14
  -5   5   0  114.62    8.43
  -6  -5   0   73.00    5.17
  -6  -5   0   77.95    4.73
   6  -5   0   67.95    4.53
  -6  -5   0   60.56    4.76
   6  -5   0   68.04    4.51
  -6  -5   0   74.37    4.96
  -6   5   0   70.33    4.48
   6   5   0   72.46    4.60
  -6   5   0   69.77    5.11
  -7  -5   0    1.84    0.45
   7  -5   0    1.78    0.48
   7  -5   0    2.61    0.32
  -7  -5   0    2.98    0.59
  -7   5   0    2.07    0.48
  -7   5   0    2.64    0.71
   7   5   0    1.02    0.42
   8  -5   0   39.00    2.80
   8  -5   0   38.21    2.66
  -8  -5   0   37.19    3.12
  -8  -5   0   39.99    3.06
  -8   5   0   37.31    3.21
   8   5   0   38.02    2.87
   9  -5   0   36.79    2.85
  -9  -5   0   39.47    3.14
  -9  -5   0   40.23    3.23
   9  -5   0   33.96    2.70
   9   5   0   42.47    3.00
  -9   5   0   40.04    3.34
 -10  -5   0   -0.31    0.33
  10  -5   0   -0.11    0.22
 -10  -5   0   -0.48    0.56
  10  -5   0    0.12    0.40
  10   5   0    0.66    0.52
 -11  -5   0    4.92    1.03
  11  -5   0    5.57    1.03
  11  -5   0    3.39    0.74
  11   5   0    3.36    0.97
 -11   5   0    3.28    0.97
  12  -5   0   10.13    1.53
 -12  -5   0    9.55    1.62
  12   5   0   10.98    1.73
 -12   5   0    9.24    1.78
   0  -6   0  382.93   24.45
   0  -6   0  403.36   25.91
   0  -6   0  372.64   24.22
   1  -6   0    9.04    0.81
   1  -6   0    8.14    0.77
  -1  -6   0    8.13    0.69
  -1  -6   0    8.28    0.79
  -1  -6   0    7.49    0.81
   2  -6   0   33.80    2.47
   2  -6   0   29.80    2.31
  -2  -6   0   32.05    2.38
  -2  -6   0   39.99    2.35
  -2  -6   0   29.92    2.55
  -2   6   0   34.41    2.51
   3  -6   0    0.39    0.18
   3  -6   0    0.26    0.17
   3  -6   0    0.57    0.21
  -3  -6   0    0.42    0.33
  -3  -6   0    0.30    0.23
  -3   6   0    0.33    0.16
  -3   6   0    0.66    0.32
   3   6   0    0.02    0.10
   4  -6   0   78.19    4.90
   4  -6   0   81.51    5.50
  -4  -6   0   79.33    5.33
  -4  -6   0   84.15    5.30
  -4  -6   0   74.60    5.68
   4  -6   0   79.52    5.18
  -4   6   0   79.03    5.55
   4   6   0   79.06    4.98
   5  -6   0    3.99    0.57
   5  -6   0    3.23    0.47
  -5  -6   0    3.07    0.70
  -5  -6   0    2.89    0.56
   5  -6   0    3.81    0.49
  -5  -6   0    3.52    0.64
  -5   6   0    3.40    0.72
  -5   6   0    4.09    0.57
  -5   6   0    3.66    0.53
   5   6   0    3.67    0.61
  -6  -6   0   47.53    3.78
  -6  -6   0   54.20    4.10
   6  -6   0   53.64    3.56
  -6  -6   0   54.71    3.88
  -6  -6   0   60.30    3.78
   6  -6   0   51.16    3.56
  -6   6   0   56.13    4.09
   6   6   0   50.62    3.62
  -6   6   0   58.15    3.55
   7  -6   0    0.11    0.10
   7  -6   0    0.12    0.23
  -7  -6   0    0.01    0.26
  -7  -6   0    0.30    0.32
  -7  -6   0    0.11    0.25
  -7   6   0    0.48    0.41
  -7   6   0   -0.09    0.23
   7   6   0    0.26    0.30
  -8  -6   0    0.94    0.43
  -8  -6   0    0.07    0.27
   8  -6   0   -0.08    0.14
   8  -6   0    0.18    0.28
  -8   6   0   -0.24    0.39
   8   6   0   -0.45    0.27
   9  -6   0    9.01    0.82
  -9  -6   0    8.51    1.20
   9  -6   0    6.93    1.08
  -9  -6   0    5.32    1.13
  -9   6   0    7.15    1.33
   9   6   0    6.75    1.10
 -10  -6   0   60.16    5.31
  10  -6   0   76.81    4.87
  10  -6   0   70.17    4.79
  10   6   0   67.86    4.88
 -10   6   0   73.38    5.53
  11  -6   0    0.16    0.28
  11  -6   0    0.48    0.46
  11   6   0    0.46    0.59
 -11   6   0    0.57    0.55
  12  -6   0   10.95    1.53
 -12   6   0    7.79    1.65
  12   6   0    7.06    1.44
   0  -7   0   -0.03    0.16
   0  -7   0    0.00    0.16
   0  -7   0   -0.06    0.09
  -1  -7   0    1.16    0.34
   1  -7   0    1.36    0.35
  -1  -7   0    1.48    0.27
   1  -7   0    0.85    0.30
   1  -7   0    1.09    0.19
  -1  -7   0    1.27    0.37
   2  -7   0  204.30   13.89
   2  -7   0  200.13   13.02
  -2  -7   0  208.41   14.02
  -2  -7   0  214.37   13.20
  -2  -7   0  198.13   13.07
   3  -7   0   15.31    1.08
  -3  -7   0   13.40    1.22
   3  -7   0   13.56    1.18
   3  -7   0   14.09    1.15
  -3  -7   0   11.62    1.28
  -3  -7   0   16.04    1.20
  -3   7   0   13.53    1.27
   3   7   0   12.03    1.03
   4  -7   0   70.02    4.38
  -4  -7   0   69.01    5.14
   4  -7   0   71.05    4.95
  -4  -7   0   71.92    4.79
   4  -7   0   65.46    4.65
  -4  -7   0   68.66    4.78
  -4   7   0   71.57    4.99
  -4   7   0   71.61    4.38
  -4   7   0   70.79    5.00
   4   7   0   75.87    4.50
   5  -7   0    1.13    0.32
  -5  -7   0    1.60    0.44
  -5  -7   0    1.95    0.43
   5  -7   0    1.43    0.37
  -5  -7   0    2.03    0.59
   5   7   0    1.56    0.43
  -5   7   0    1.86    0.58
  -5   7   0    1.61    0.36
  -6  -7   0   56.36    4.17
  -6  -7   0   48.80    3.89
  -6  -7   0   52.40    3.86
   6  -7   0   53.07    3.62
  -6   7   0   59.69    4.23
   6   7   0   58.72    3.75
  -6   7   0   58.32    3.62
  -7  -7   0    1.04    0.38
   7  -7   0    0.72    0.16
   7  -7   0    1.06    0.40
  -7  -7   0    0.08    0.43
   7   7   0    1.07    0.42
  -7   7   0    1.29    0.60
   8  -7   0   83.87    5.41
   8  -7   0   79.41    5.38
  -8  -7   0   77.54    6.16
   8   7   0   83.63    5.51
  -8   7   0   89.06    6.24
   9  -7   0    0.19    0.20
   9  -7   0   -0.14    0.35
   9   7   0    0.47    0.39
 -10  -7   0   -0.09    0.44
  10  -7   0   -0.24    0.33
  10  -7   0    0.20    0.24
 -10   7   0    0.38    0.57
  10   7   0    0.50    0.49
  11  -7   0    4.22    0.97
 -11   7   0    3.14    1.11
  11   7   0    3.60    0.99
  12  -7   0   17.24    2.04
 -12   7   0   19.29    2.57
  12   7   0   14.95    2.12
   0  -8   0  172.08   10.77
   0  -8   0  162.71   11.49
   0  -8   0  167.33   10.78
  -1  -8   0   99.20    6.68
  -1  -8   0  102.55    7.15
   1  -8   0  103.08    7.10
   1  -8   0   99.60    6.65
  -1  -8   0  102.34    6.63
   1  -8   0  100.81    6.54
  -2  -8   0   10.45    1.12
   2  -8   0   12.02    1.04
  -2  -8   0   10.60    1.05
   2  -8   0   10.96    0.80
   2  -8   0   11.15    1.06
  -2  -8   0   10.98    0.98
  -3  -8   0   90.35    6.33
   3  -8   0   91.79    6.16
  -3  -8   0   92.34    5.88
  -3  -8   0   87.07    5.88
   3  -8   0   89.66    5.80
   3   8   0   79.56    5.38
  -3   8   0   84.20    6.03
  -4  -8   0   26.32    1.92
  -4  -8   0   25.11    2.14
  -4  -8   0   25.49    1.96
   4  -8   0   22.82    1.82
   4  -8   0   24.29    1.92
  -4   8   0   25.29    2.04
  -4   8   0   21.49    1.98
   4   8   0   23.90    1.75
   5  -8   0   11.58    1.06
  -5  -8   0   10.99    1.41
  -5  -8   0   11.62    1.15
  -5  -8   0   11.63    1.18
  -5   8   0   12.08    1.05
   5   8   0   13.34    1.16
  -5   8   0   13.54    1.49
   6  -8   0   45.33    3.14
  -6  -8   0   52.46    3.65
  -6  -8   0   37.72    3.30
  -6  -8   0   53.55    3.45
   6   8   0   46.74    3.23
  -6   8   0   44.42    3.62
   7  -8   0   23.59    1.57
  -7  -8   0   21.96    1.94
  -7  -8   0   25.61    2.29
   7  -8   0   22.14    1.82
  -7   8   0   22.69    2.23
   7   8   0   23.79    1.94
   8  -8   0    4.26    0.79
   8  -8   0    5.14    0.52
   8   8   0    6.23    1.00
  -8   8   0    5.39    1.14
   9  -8   0    0.74    0.29
   9  -8   0    0.65    0.44
  -9  -8   0    0.71    0.57
   9   8   0    0.04    0.45
  -9   8   0    0.72    0.59
  10  -8   0   18.62    1.52
 -10  -8   0   16.44    2.15
  10  -8   0   16.40    1.86
  10   8   0   16.82    2.07
 -10   8   0   19.20    2.44
 -11  -8   0    0.14    0.54
  11   8   0    0.29    0.67
 -11   8   0    0.13    0.70
 -12   8   0    0.20    0.71
   0  -9   0    0.28    0.15
   0  -9   0    0.43    0.30
   0  -9   0    0.53    0.26
  -1  -9   0   36.20    2.61
   1  -9   0   35.40    2.72
  -1  -9   0   30.38    2.72
   1  -9   0   35.68    2.58
   1  -9   0   35.39    2.39
  -1  -9   0   34.68    2.47
  -2  -9   0   53.11    3.61
   2  -9   0   50.66    3.33
   2  -9   0   46.56    3.51
   2  -9   0   50.50    3.75
  -2  -9   0   50.65    3.86
  -2  -9   0   51.45    3.51
   3  -9   0    3.85    0.34
  -3  -9   0    3.30    0.66
   3  -9   0    3.22    0.58
   3  -9   0    2.50    0.54
  -3  -9   0    2.60    0.61
  -3  -9   0    3.67    0.57
  -4  -9   0    1.54    0.45
  -4  -9   0    2.07    0.57
   4  -9   0    1.51    0.43
  -4  -9   0    1.89    0.43
   4  -9   0    1.72    0.41
   4  -9   0    1.64    0.19
  -4   9   0    0.84    0.54
   5  -9   0   23.45    1.77
  -5  -9   0   22.56    1.84
  -5  -9   0   24.43    1.91
  -5   9   0   17.46    1.90
  -6  -9   0    7.66    1.24
  -6  -9   0    9.19    1.16
  -6  -9   0   10.12    1.24
  -6   9   0   11.66    1.47
   7  -9   0   37.01    2.47
  -7  -9   0   44.76    3.19
  -7  -9   0   34.04    2.86
  -7   9   0   37.19    3.17
   7   9   0   34.24    2.76
  -8  -9   0    2.19    0.75
   8  -9   0    2.23    0.36
   8   9   0    3.09    0.77
  -8   9   0    2.96    0.92
  -9  -9   0   -0.30    0.39
   9  -9   0    0.06    0.20
   9   9   0   -0.67    0.40
  -9   9   0   -1.06    0.49
  10  -9   0    0.30    0.28
 -10  -9   0    0.24    0.50
 -10   9   0   -0.10    0.50
  10   9   0   -1.49    0.53
 -11  -9   0   47.98    4.21
  11   9   0   41.52    3.79
 -11   9   0   57.61    4.48
   0 -10   0    3.56    0.65
   0 -10   0    2.84    0.62
   0 -10   0    3.02    0.48
  -1 -10   0   22.02    1.73
   1 -10   0   20.51    1.82
  -1 -10   0   22.27    1.87
   1 -10   0   23.78    1.95
  -1 -10   0   22.37    2.00
   1 -10   0   23.69    1.66
   2 -10   0    2.10    0.50
  -2 -10   0    1.77    0.42
  -2 -10   0    1.64    0.47
   2 -10   0    1.66    0.29
  -2 -10   0    1.34    0.48
   2 -10   0    1.48    0.43
  -3 -10   0   49.77    3.61
  -3 -10   0   53.91    3.93
   3 -10   0   48.86    3.53
   3 -10   0   45.73    3.68
  -3 -10   0   51.30    3.53
   3 -10   0   48.98    3.27
   4 -10   0    2.35    0.29
  -4 -10   0    1.74    0.50
   4 -10   0    1.87    0.47
  -4 -10   0    2.43    0.50
   5 -10   0   11.33    0.81
  -5 -10   0    9.94    1.23
   5 -10   0   11.00    1.24
  -5 -10   0   10.42    1.32
  -6 -10   0   21.12    2.05
  -6 -10   0   17.07    1.74
  -6 -10   0   19.92    1.86
   6 -10   0   21.01    1.40
  -6  10   0   20.76    2.03
   7 -10   0   62.47    3.96
  -7 -10   0   61.66    4.42
  -7 -10   0   61.06    4.82
  -7  10   0   53.76    4.64
  -8 -10   0    1.02    0.66
   8 -10   0    1.48    0.31
  -8  10   0    0.09    0.59
   9 -10   0   30.34    2.13
  -9 -10   0   28.18    2.78
  -9  10   0   22.97    2.95
 -10 -10   0    1.02    0.68
 -10  10   0    2.30    0.86
 -11 -10   0    7.95    1.57
 -11  10   0   11.17    1.93
   0 -11   0    0.00    0.26
   0 -11   0   -0.02    0.23
   0 -11   0    0.07    0.17
  -1 -11   0   -0.05    0.24
   1 -11   0    0.23    0.25
  -1 -11   0    0.18    0.22
   1 -11   0   -0.17    0.20
  -1 -11   0   -0.01    0.29
   1 -11   0    0.14    0.15
   2 -11   0   40.26    2.95
  -2 -11   0   40.47    3.02
   2 -11   0   39.35    3.08
  -2 -11   0   38.31    3.19
  -2 -11   0   37.89    2.85
   2 -11   0   39.14    2.71
   3 -11   0   13.42    1.35
   3 -11   0   13.96    1.33
   3 -11   0   14.66    1.08
  -3 -11   0   10.38    1.41
  -3 -11   0   12.56    1.60
  -3 -11   0   14.32    1.29
   4 -11   0   17.32    1.30
   4 -11   0   20.30    1.64
  -4 -11   0   20.11    1.64
  -4 -11   0   17.41    1.81
  -4 -11   0   14.62    1.61
   5 -11   0    9.65    1.26
  -5 -11   0   10.09    1.37
   5 -11   0    9.54    0.77
  -5 -11   0   10.45    1.52
  -5 -11   0    9.02    1.18
  -6 -11   0   14.36    1.68
   6 -11   0   13.62    1.05
  -6 -11   0   15.47    1.65
  -6 -11   0   12.19    1.74
  -7 -11   0   45.14    3.82
   7 -11   0   44.63    3.01
  -7 -11   0   44.54    3.66
  -8 -11   0    1.11    0.65
   8 -11   0    2.82    0.44
  -9 -11   0    6.58    1.33
   9 -11   0    8.21    0.89
  -9  11   0    8.26    1.47
 -10 -11   0   -0.49    0.43
 -10  11   0   -0.89    0.55
   0 -12   0   85.77    5.75
   0 -12   0   83.86    5.58
   0 -12   0   78.55    6.08
   1 -12   0    6.01    0.99
  -1 -12   0    5.28    0.90
   1 -12   0    4.86    0.65
  -1 -12   0    4.24    0.67
   1 -12   0    3.63    0.76
  -1 -12   0    7.12    1.08
  -2 -12   0    0.24    0.36
   2 -12   0    0.04    0.31
   2 -12   0    0.09    0.27
  -2 -12   0    0.17    0.33
   2 -12   0    0.07    0.16
  -2 -12   0   -0.09    0.19
  -3 -12   0   12.71    1.63
   3 -12   0   13.44    1.34
  -3 -12   0   10.31    1.27
   3 -12   0   13.81    1.33
  -3 -12   0   11.74    1.50
   3 -12   0   13.22    1.06
  -4 -12   0   49.36    3.84
   4 -12   0   50.61    3.47
  -4 -12   0   54.20    4.21
  -4 -12   0   54.27    3.80
   4 -12   0   49.69    3.73
  -5 -12   0    5.10    0.86
   5 -12   0    4.14    0.53
  -5 -12   0    4.96    1.08
   6 -12   0   14.77    1.18
  -6 -12   0   17.36    2.15
  -7 -12   0    8.18    1.41
   7 -12   0    8.56    0.78
   8 -12   0    1.80    0.40
  -8 -12   0    1.90    0.81
  -9 -12   0    5.61    1.32
   0 -13   0   -0.23    0.36
   0 -13   0    0.24    0.35
   0 -13   0    0.12    0.19
  -1 -13   0    0.05    0.37
   1 -13   0    0.76    0.42
  -1 -13   0    0.87    0.33
   1 -13   0    0.83    0.44
   1 -13   0    0.89    0.30
   2 -13   0  110.36    8.07
   2 -13   0  118.90    7.65
  -2 -13   0  117.96    7.60
  -2 -13   0  107.99    8.18
   2 -13   0  108.14    7.41
  -3 -13   0   -0.13    0.37
  -3 -13   0    0.08    0.27
   3 -13   0   -0.06    0.16
   3 -13   0    0.14    0.33
   4 -13   0    7.29    1.11
  -4 -13   0    9.07    1.15
  -4 -13   0    6.98    1.28
   4 -13   0    8.70    0.81
   5 -13   0    9.56    0.88
  -5 -13   0    9.43    1.27
  -5 -13   0    9.93    1.59
   6 -13   0   61.08    4.04
  -6 -13   0   56.49    4.85
  -7 -13   0    3.84    1.04
   7 -13   0    3.29    0.53
  -8 -13   0   16.47    2.23
   0 -14   0   22.60    2.16
   0 -14   0   21.45    1.81
   1 -14   0    0.15    0.35
  -1 -14   0    0.17    0.26
  -1 -14   0   -0.18    0.32
   1 -14   0    0.05    0.18
   2 -14   0    8.37    0.95
  -2 -14   0    6.59    1.00
   2 -14   0    7.99    1.24
  -2 -14   0    7.35    1.25
  -3 -14   0    0.89    0.61
   3 -14   0    1.30    0.35
  -3 -14   0    1.30    0.50
   4 -14   0   19.57    1.53
  -4 -14   0   18.43    1.78
  -4 -14   0   16.41    2.21
  -5 -14   0    0.64    0.57
  -5 -14   0    1.33    0.59
   5 -14   0    1.20    0.37
  -6 -14   0   22.26    2.30
   6 -14   0   19.74    1.63
  -7 -14   0    3.61    1.07
   0 -15   0    0.19    0.26
   0 -15   0   -0.16    0.38
  -1 -15   0   14.79    1.52
   1 -15   0   17.14    1.52
  -1 -15   0   16.79    2.04
   1 -15   0   19.05    1.88
  -2 -15   0   32.93    2.95
  -2 -15   0   29.62    2.54
   2 -15   0   29.39    2.79
   2 -15   0   34.22    2.47
  -3 -15   0    1.98    0.61
  -3 -15   0    2.49    0.81
  -4 -15   0    3.92    1.11
  -4 -15   0    4.31    0.88
  -5 -15   0   25.80    2.35
  -5 -15   0   26.29    2.68
  -6 -15   0    7.65    1.52
   0 -16   0    1.49    0.68
  -1 -16   0    2.04    0.80
   1 -16   0    2.42    0.72
  -2 -16   0    0.70    0.55
  -3 -16   0   19.97    2.50
  -4 -16   0    1.33    0.73
  -5 -16   0    1.79    0.83
   0 -17   0    0.61    0.55
  -1 -17   0   26.54    2.78
   1 -17   0   31.44    2.84
  -2 -17   0    1.45    0.73
 -13   0   1   -0.01    0.46
  13   0  -1   -0.34    0.47
 -12   0   1   -0.08    0.45
  12   0  -1   -0.09    0.36
  11   0  -1    4.82    0.98
 -11   0   1    5.55    1.19
 -10   0   1    0.37    0.34
  10   0  -1   -0.10    0.35
   9   0  -1   -0.26    0.23
  -9   0   1   -0.05    0.27
  -8   0   1   -0.06    0.22
   8   0  -1   -0.20    0.20
  -8   0   1   -0.02    0.37
  -8   0   1   -0.27    0.19
  -7   0   1    1.99    0.44
   7   0  -1    3.11    0.58
  -7   0   1    2.14    0.53
  -7   0   1    1.66    0.46
   6   0  -1   -0.14    0.09
  -6   0   1    0.15    0.20
   6   0  -1   -0.09    0.10
   6   0  -1   -0.06    0.18
  -6   0   1    0.06    0.29
  -6   0   1    0.08    0.20
  -5   0   1  193.30   15.08
  -5   0   1  231.09   14.92
   5   0  -1  220.14   14.02
   5   0  -1  242.26   13.47
   5   0  -1  236.94   14.28
  -5   0   1  224.55   13.39
   4   0  -1    0.10    0.18
  -4   0   1    0.00    0.14
   4   0  -1   -0.21    0.08
   4   0  -1    0.03    0.10
  -4   0   1   -0.10    0.15
   4   0  -1   -0.10    0.06
   3   0  -1  560.70   35.80
   3   0  -1  575.34   35.26
   3   0  -1  566.08   35.78
   2   0  -1   -0.01    0.07
   2   0  -1   -0.01    0.04
   2   0  -1    0.03    0.05
   1   0  -1  818.08   50.76
   0   0   1   -0.17    0.05
   0   0  -1   -0.17    0.05
   0   0   1   -0.15    0.05
   0   0  -1   -0.15    0.04
   2   0   1   -0.38    0.12
  -2   0  -1   -0.23    0.07
  -2   0  -1   -0.35    0.11
  -3   0  -1  210.73   12.78
   3   0   1  225.11   12.86
  -3   0  -1  171.60   12.49
   4   0   1    0.18    0.20
   4   0   1   -0.12    0.09
  -4   0  -1   -0.28    0.18
  -4   0  -1   -0.04    0.10
   4   0   1    0.00    0.11
  -5   0  -1  332.14   21.58
   5   0   1  350.72   21.76
   6   0   1   -0.01    0.15
   6   0   1    0.17    0.22
  -6   0  -1   -0.21    0.27
  -6   0  -1   -0.46    0.14
  -7   0  -1   18.50    1.76
  -7   0  -1   21.24    1.72
   7   0   1   18.91    1.64
   8   0   1    0.16    0.28
  -8   0  -1   -0.08    0.29
   9   0   1  131.44    8.41
  -9   0  -1  132.01    9.33
  10   0   1    0.01    0.32
 -10   0  -1   -0.19    0.33
 -11   0  -1    4.95    1.17
  11   0   1    3.73    0.93
 -12   0  -1    0.31    0.48
  12   0   1    0.00    0.51
 -13   0  -1   11.28    1.94
  13   0   1   11.41    1.75
 -13  -1   1   26.35    2.85
  13  -1  -1   32.78    2.79
  13   1  -1   29.76    2.81
 -13   1   1   27.32    3.28
 -12  -1   1    0.14    0.46
  12  -1  -1    0.22    0.47
  12   1  -1    0.26    0.52
 -12   1   1    0.84    0.60
  11  -1  -1    3.49    0.79
 -11  -1   1    4.90    1.12
 -11   1   1    5.28    1.11
  11   1  -1    3.14    0.81
 -10  -1   1    7.27    1.23
  10  -1  -1    6.35    1.04
 -10   1   1    7.22    1.29
  10   1  -1    6.91    1.10
  -9  -1   1   51.85    3.82
   9  -1  -1   46.30    3.48
  -9  -1   1   51.18    3.90
  -9   1   1   51.30    3.95
  -9   1   1   48.69    3.43
   9   1  -1   46.76    3.50
  -8  -1   1    1.12    0.44
   8  -1  -1    0.41    0.35
  -8  -1   1    0.59    0.34
  -8   1   1    1.35    0.50
   8   1  -1    2.01    0.54
  -8   1   1    1.18    0.41
  -8   1   1    1.79    0.56
  -7  -1   1   22.25    1.69
   7  -1  -1   21.03    1.65
   7  -1  -1   20.03    1.71
  -7  -1   1   21.13    1.89
  -7  -1   1   24.40    1.91
  -7  -1   1   27.54    1.63
  -7   1   1   19.81    1.89
   7   1  -1   19.93    1.72
  -7   1   1   19.90    1.66
  -6  -1   1  140.96    9.25
   6  -1  -1  140.91    8.47
  -6  -1   1  124.51    8.19
  -6  -1   1  132.61    9.15
   6  -1  -1  144.66    8.63
   6  -1  -1  140.13    8.68
  -6  -1   1  137.57    8.53
   6  -1  -1  127.48    8.23
  -6   1   1  126.96    8.20
  -6   1   1  140.15    9.20
  -6   1   1  129.90    9.18
   6   1  -1  121.28    8.23
   6   1  -1  134.39    8.50
   5  -1  -1    7.60    0.57
  -5  -1   1    6.87    0.68
   5  -1  -1    6.75    0.80
   5  -1  -1    7.71    0.61
   5  -1  -1    7.00    0.58
  -5  -1   1    7.88    0.82
  -5  -1   1    8.67    0.74
   5   1  -1    7.75    0.83
   5   1  -1    6.99    0.61
  -5   1   1    7.92    0.84
  -5   1   1    7.18    0.79
   5   1  -1    7.30    0.65
  -5   1   1    7.18    0.90
   4  -1  -1    4.69    0.33
   4  -1  -1    4.61    0.34
   4  -1  -1    4.35    0.39
  -4  -1   1    5.11    0.50
  -4  -1   1    5.52    0.59
  -4  -1   1    4.81    0.45
   4  -1  -1    3.12    0.49
  -4  -1   1    3.72    0.57
   4   1  -1    5.03    0.45
  -4   1   1    4.70    0.56
   4   1  -1    5.50    0.61
   4   1  -1    4.56    0.42
   3  -1  -1   50.94    3.31
   3  -1  -1   54.80    3.41
  -3  -1   1   55.32    3.47
  -3  -1   1   50.14    3.43
  -3   1   1   52.90    3.31
   3   1  -1   56.92    3.48
   3   1  -1   51.38    3.43
   2  -1  -1  139.75    8.85
   2   1  -1  142.68    8.99
   2   1  -1  141.94    8.87
  -1  -1   1   13.25    0.90
  -1  -1   1   11.48    0.89
   1   1  -1   13.44    0.90
   1   1  -1   13.60    0.90
   0  -1  -1   44.28    3.04
   0  -1   1   42.20    3.07
   0   1   1   52.19    3.05
   0   1  -1   43.20    3.03
   0   1  -1   57.97    3.08
   1  -1   1  428.90   27.13
   1  -1   1  431.86   26.69
   1   1   1  429.16   26.71
  -2  -1  -1   47.25    3.10
   2  -1   1   48.41    3.04
  -2  -1  -1   49.89    3.19
   2  -1   1   51.39    3.17
  -2   1  -1   46.27    3.04
   2   1   1   49.59    3.09
  -2   1  -1   47.25    3.11
   3  -1   1  411.85   23.67
   3  -1   1  395.07   25.42
   3  -1   1  381.11   25.38
   3   1   1  419.04   24.98
  -4  -1  -1   43.12    2.58
   4  -1   1   38.93    2.52
   4  -1   1   36.05    2.57
   4  -1   1   37.73    2.50
  -4  -1  -1   39.48    2.44
   4   1   1   37.88    2.52
  -4   1  -1   29.54    2.72
   4   1   1   36.84    2.43
   5  -1   1    2.90    0.51
  -5  -1  -1    3.41    0.48
  -5  -1  -1    3.40    0.36
   5  -1   1    2.52    0.42
  -5  -1  -1    3.14    0.51
   5  -1   1    3.81    0.43
  -5  -1  -1    2.49    0.49
  -5   1  -1    2.60    0.53
   5   1   1    2.84    0.29
   5   1   1    2.68    0.52
  -6  -1  -1   41.09    2.56
   6  -1   1   34.78    2.57
  -6  -1  -1   34.27    2.73
  -6  -1  -1   38.31    2.41
   6  -1   1   36.40    2.57
   6  -1   1   36.47    2.63
  -6  -1  -1   33.12    2.78
  -6   1  -1   35.95    2.84
   6   1   1   37.82    2.61
   6   1   1   37.41    2.39
   7  -1   1   94.36    5.92
   7  -1   1   92.89    5.66
  -7  -1  -1   87.92    6.21
  -7  -1  -1   74.26    6.10
  -7   1  -1   93.85    6.28
   7   1   1   85.18    5.64
  -8  -1  -1    3.33    0.74
   8  -1   1    2.92    0.57
   8  -1   1    1.84    0.52
   8   1   1    2.77    0.65
  -8   1  -1    2.15    0.64
   9  -1   1   15.53    1.65
  -9  -1  -1   12.56    1.64
   9   1   1   13.56    1.57
  -9   1  -1   13.42    1.73
  10  -1   1   13.29    1.65
 -10  -1  -1   17.83    2.10
 -10   1  -1   14.91    1.95
  10   1   1   13.53    1.68
 -11  -1  -1   30.47    2.85
  11  -1   1   28.96    2.55
  11   1   1   29.16    2.59
 -11   1  -1   31.33    2.94
  12  -1   1    0.29    0.46
 -12  -1  -1   -0.15    0.52
  12   1   1   -0.18    0.37
 -12   1  -1   -0.17    0.49
 -13  -1  -1   32.78    3.18
  13  -1   1   31.59    2.87
  13   1   1   31.00    2.89
 -13   1  -1   31.37    3.27
  13  -2  -1   -0.07    0.49
 -13  -2   1    0.87    0.74
 -13   2   1    0.21    0.55
  13   2  -1    0.98    0.79
 -12  -2   1   26.81    2.58
  12  -2  -1   25.07    2.33
 -12   2   1   26.86    2.68
  12   2  -1   19.82    2.44
 -11  -2   1    0.50    0.48
  11  -2  -1    1.11    0.55
  11   2  -1    1.76    0.67
 -11   2   1    1.48    0.63
  10  -2  -1   20.60    1.88
 -10  -2   1   19.91    2.02
  10   2  -1   18.25    1.82
 -10   2   1   23.65    2.20
   9  -2  -1    7.16    1.04
  -9  -2   1    6.66    1.12
   9  -2  -1    6.28    0.80
  -9  -2   1    5.58    0.98
   9   2  -1    6.01    0.96
  -9   2   1    5.78    1.05
  -9   2   1    6.41    0.93
   8  -2  -1   93.62    6.45
  -8  -2   1  100.23    6.95
   8  -2  -1   99.11    6.28
  -8  -2   1   97.89    6.93
  -8   2   1   99.49    7.01
  -8   2   1  100.77    6.23
   8   2  -1   94.05    6.27
  -7  -2   1    0.96    0.37
  -7  -2   1    0.41    0.24
   7  -2  -1    1.02    0.38
   7  -2  -1    0.84    0.21
  -7  -2   1    0.55    0.44
   7  -2  -1    0.63    0.21
  -7  -2   1    1.03    0.27
  -7   2   1    0.43    0.37
   7   2  -1    0.86    0.38
  -7   2   1    0.69    0.28
  -6  -2   1    2.41    0.50
  -6  -2   1    2.08    0.44
   6  -2  -1    2.55    0.50
   6  -2  -1    2.86    0.34
   6  -2  -1    2.70    0.29
   6  -2  -1    2.40    0.31
   6  -2  -1    2.49    0.32
  -6  -2   1    3.84    0.48
  -6   2   1    1.72    0.43
  -6   2   1    2.66    0.62
  -6   2   1    2.48    0.46
   6   2  -1    3.24    0.57
  -5  -2   1  145.20   10.03
  -5  -2   1  162.46   10.19
  -5  -2   1  159.30    9.57
   5  -2  -1  167.03    9.97
  -5  -2   1  156.66   10.84
   5  -2  -1  161.17    9.60
   5  -2  -1  166.25    9.98
  -5  -2   1  160.81   10.65
   5   2  -1  166.49    9.63
   5   2  -1  164.03   10.04
  -5   2   1  140.05   10.77
  -5   2   1  150.23   10.68
  -5   2   1  163.59    9.60
   4  -2  -1  233.34   15.07
   4  -2  -1  254.13   14.35
  -4  -2   1  249.43   14.32
  -4  -2   1  201.91   15.32
   4  -2  -1  248.82   15.06
   4   2  -1  248.32   15.12
  -4   2   1  244.13   14.33
   4   2  -1  252.64   14.35
  -3  -2   1   80.63    5.25
   3  -2  -1   81.12    4.93
  -3  -2   1   76.07    5.17
   3  -2  -1   81.79    5.14
  -3  -2   1   81.85    5.59
   3   2  -1   80.14    5.17
  -3   2   1   85.30    4.94
  -2  -2   1   38.71    2.58
  -2  -2   1   35.25    2.55
   2  -2  -1   39.15    2.54
   2   2  -1   43.06    2.58
  -1  -2   1   68.03    5.17
   1  -2  -1   92.21    5.14
  -1  -2   1   75.65    5.13
   1   2  -1   89.44    5.15
  -1   2   1   79.72    5.13
   0  -2   1  494.95   30.95
   0   2   1  500.65   30.96
   1  -2   1  118.93    7.22
   1  -2   1  119.28    7.30
   1   2   1  122.09    7.26
  -1   2  -1  100.20    7.21
   2  -2   1   35.36    2.41
   2  -2   1   36.28    2.37
  -2  -2  -1   33.57    2.43
  -2  -2  -1   41.04    2.50
   2   2   1   39.18    2.44
  -2   2  -1   38.42    2.39
  -3  -2  -1   11.19    0.76
   3  -2   1   10.07    0.71
   3  -2   1    9.47    0.77
  -3  -2  -1    9.67    0.79
   3  -2   1    9.12    0.68
   3  -2   1    9.24    0.64
   3   2   1   10.86    0.74
  -3   2  -1    8.54    0.66
   3   2   1    8.18    0.78
  -4  -2  -1   46.06    2.88
   4  -2   1   39.25    2.73
  -4  -2  -1   43.61    3.05
   4  -2   1   43.24    2.80
   4  -2   1   42.48    2.76
  -4  -2  -1   41.66    2.76
   4   2   1   40.01    2.77
  -4   2  -1   33.17    3.03
   4   2   1   45.47    2.76
  -5  -2  -1  162.08   11.47
  -5  -2  -1  158.42   10.79
  -5  -2  -1  169.95   11.67
   5  -2   1  173.08   10.97
   5  -2   1  167.72   11.01
   5  -2   1  176.21   10.40
  -5  -2  -1  181.53   11.06
  -5   2  -1  159.58   11.56
   5   2   1  185.54   10.81
   5   2   1  183.14   10.46
  -6  -2  -1   19.73    1.69
  -6  -2  -1   21.47    1.46
   6  -2   1   18.55    1.53
  -6  -2  -1   18.83    1.70
   6  -2   1   19.34    1.58
  -6  -2  -1   20.16    1.59
   6   2   1   19.93    1.62
  -6   2  -1   22.44    1.77
   6   2   1   21.11    1.42
   7  -2   1   -0.26    0.22
  -7  -2  -1   -0.02    0.21
   7  -2   1   -0.06    0.15
   7   2   1    0.08    0.21
  -7   2  -1   -0.09    0.23
   8  -2   1   51.19    3.58
  -8  -2  -1   50.19    3.92
   8  -2   1   50.93    3.64
  -8  -2  -1   51.66    3.85
  -8   2  -1   49.32    3.99
   8   2   1   54.68    3.67
   9  -2   1  104.23    6.61
   9  -2   1   93.52    6.82
  -9  -2  -1  106.11    7.31
   9   2   1   97.90    6.61
  -9   2  -1  104.68    7.38
 -10  -2  -1   -0.07    0.32
  10  -2   1    0.00    0.40
  10   2   1    0.23    0.47
 -10   2  -1   -0.08    0.43
 -11  -2  -1    1.15    0.59
  11  -2   1    0.99    0.54
 -11   2  -1    0.50    0.63
  11   2   1    1.59    0.66
 -12  -2  -1   32.45    3.14
  12  -2   1   37.51    2.96
 -12   2  -1   30.47    3.19
  12   2   1   34.90    2.99
  13  -2   1    9.77    1.56
 -13  -2  -1   10.10    1.82
  13   2   1    7.13    1.49
 -13   2  -1   11.43    1.96
  13  -3  -1    1.38    0.69
 -13  -3   1    1.42    0.76
  13   3  -1    0.85    0.82
 -13   3   1    0.24    0.61
  12  -3  -1   20.92    2.35
 -12  -3   1   23.00    2.39
 -12   3   1   21.41    2.73
  12   3  -1   24.32    2.55
 -11  -3   1   -0.27    0.36
  11  -3  -1    0.86    0.53
 -11   3   1    1.01    0.58
  11   3  -1    0.72    0.55
  10  -3  -1   35.65    2.74
  10  -3  -1   37.56    2.85
 -10  -3   1   39.38    3.16
  10   3  -1   33.83    2.82
 -10   3   1   36.63    3.21
   9  -3  -1   16.70    1.40
  -9  -3   1   18.97    1.74
   9  -3  -1   17.01    1.56
  -9   3   1   15.71    1.92
   9   3  -1   15.22    1.70
  -9   3   1   15.32    1.48
   8  -3  -1   10.74    1.26
   8  -3  -1   11.36    0.96
  -8  -3   1    9.43    1.32
  -8  -3   1   12.38    1.46
  -8   3   1   11.46    1.26
   8   3  -1   10.50    1.31
  -8   3   1   11.15    1.45
  -7  -3   1   -0.21    0.22
   7  -3  -1    0.08    0.11
  -7  -3   1    0.24    0.22
  -7  -3   1    0.25    0.36
   7  -3  -1    0.19    0.22
  -7   3   1   -0.14    0.16
  -7   3   1    0.20    0.35
   7   3  -1    0.31    0.26
  -7   3   1    0.54    0.35
  -6  -3   1  171.57   10.88
  -6  -3   1  133.22   10.33
   6  -3  -1  164.28   10.12
   6  -3  -1  160.61    9.79
   6  -3  -1  168.55   10.13
  -6  -3   1  174.89   11.07
  -6  -3   1  168.29   10.24
  -6  -3   1  149.42    9.72
  -6   3   1  155.41    9.75
  -6   3   1  160.14   10.93
   6   3  -1  162.35    9.82
   5  -3  -1    2.41    0.31
  -5  -3   1    2.46    0.40
  -5  -3   1    3.23    0.47
   5  -3  -1    2.10    0.40
  -5  -3   1    2.09    0.40
   5  -3  -1    2.28    0.32
  -5  -3   1    2.59    0.49
  -5   3   1    2.11    0.53
  -5   3   1    1.85    0.40
  -5   3   1    1.28    0.36
   5   3  -1    1.61    0.39
  -4  -3   1   69.69    4.07
   4  -3  -1   65.62    4.21
  -4  -3   1   69.45    4.34
  -4  -3   1   68.52    4.29
   4  -3  -1   65.51    4.08
  -4  -3   1   67.03    4.66
  -4   3   1   66.15    4.07
  -4   3   1   51.91    4.54
   4   3  -1   62.29    4.08
   3  -3  -1    1.88    0.30
   3  -3  -1    2.01    0.34
  -3  -3   1    1.96    0.43
  -3  -3   1    1.89    0.33
  -3  -3   1    1.76    0.33
   3   3  -1    2.26    0.37
  -3   3   1    1.86    0.32
  -2  -3   1   90.71    5.96
  -2  -3   1   93.14    5.91
   2  -3  -1   90.50    5.88
   2   3  -1   96.93    5.92
  -2   3   1   90.72    5.90
  -1  -3   1   49.50    3.31
  -1  -3   1   47.80    3.30
   1  -3  -1   51.86    3.30
   1   3  -1   53.18    3.32
  -1   3   1   49.86    3.31
   0  -3   1  296.67   18.55
   0  -3   1  304.13   18.33
   0  -3  -1  282.62   18.33
   0   3   1  289.36   18.34
  -1  -3  -1   58.80    4.02
   1  -3   1   60.85    3.99
   1  -3   1   60.85    3.99
   1   3   1   66.47    4.05
  -1   3  -1   64.55    4.02
  -2  -3  -1    7.24    0.76
   2  -3   1    8.01    0.59
  -2  -3  -1    6.65    0.62
  -2  -3  -1    7.06    0.63
   2  -3   1    7.26    0.53
   2   3   1    7.45    0.65
   3  -3   1    8.32    0.58
  -3  -3  -1    7.30    0.81
   3  -3   1    8.75    0.59
   3  -3   1    8.30    0.61
  -3  -3  -1    8.76    0.71
   3  -3   1    6.82    0.66
  -3  -3  -1    8.07    0.72
  -3   3  -1    8.55    0.68
   3   3   1    9.06    0.71
   3   3   1    6.04    0.74
  -4  -3  -1  226.49   15.20
   4  -3   1  227.52   14.25
   4  -3   1  244.39   14.28
   4  -3   1  230.51   13.42
  -4  -3  -1  207.98   14.13
  -4  -3  -1  203.92   14.38
   4  -3   1  231.51   14.02
   4   3   1  242.16   14.15
  -4   3  -1  205.21   14.95
   5  -3   1   35.48    2.45
   5  -3   1   33.98    2.29
  -5  -3  -1   35.12    2.46
  -5  -3  -1   35.01    2.66
   5  -3   1   35.10    2.29
  -5  -3  -1   36.76    2.72
  -5  -3  -1   39.47    2.57
   5  -3   1   35.38    2.40
   5  -3   1   34.27    2.43
  -5   3  -1   37.57    2.82
   5   3   1   40.56    2.46
   5   3   1   36.16    2.51
   6  -3   1   41.90    2.93
  -6  -3  -1   40.38    3.00
  -6  -3  -1   43.52    3.19
   6  -3   1   44.15    2.93
  -6  -3  -1   44.32    3.25
   6   3   1   43.68    2.99
  -6   3  -1   41.45    3.28
  -7  -3  -1    0.95    0.47
  -7  -3  -1    0.76    0.33
   7  -3   1    0.53    0.34
   7  -3   1    0.67    0.25
  -7   3  -1   -0.91    0.36
   7   3   1    0.29    0.30
  -8  -3  -1   20.13    1.99
  -8  -3  -1   27.80    2.15
   8  -3   1   22.70    1.88
   8  -3   1   21.13    1.79
   8   3   1   23.47    1.96
  -8   3  -1   25.10    2.21
   9  -3   1   12.36    1.47
   9  -3   1   11.01    1.17
  -9  -3  -1   10.77    1.50
  -9   3  -1   16.75    1.44
   9   3   1    9.27    1.35
 -10  -3  -1   78.14    5.71
  10  -3   1   71.81    5.29
  10  -3   1   75.42    5.18
  10   3   1   76.47    5.26
 -10   3  -1   76.84    5.86
  11  -3   1    0.28    0.48
  11  -3   1    0.64    0.36
 -11  -3  -1    0.81    0.57
 -11   3  -1    0.19    0.56
  11   3   1    0.25    0.59
 -12  -3  -1    0.71    0.49
  12  -3   1   -0.08    0.49
 -12   3  -1    0.17    0.51
  12   3   1    0.58    0.66
  13  -3   1    8.52    1.47
 -13  -3  -1    9.03    1.76
 -13   3  -1    9.86    1.92
  13   3   1    9.06    1.62
  13  -4  -1    0.78    0.58
 -13  -4   1    2.65    0.95
 -13   4   1    1.37    0.75
  13   4  -1    2.13    0.94
 -12  -4   1   21.69    2.57
  12  -4  -1   21.44    2.35
 -12   4   1   21.38    2.73
  12   4  -1   20.61    2.40
 -11  -4   1   17.12    2.03
  11  -4  -1   13.46    1.39
  11  -4  -1   14.96    1.75
  11   4  -1   11.85    1.70
 -11   4   1   17.96    2.25
  10  -4  -1   70.97    4.64
  10  -4  -1   68.31    4.59
 -10  -4   1   55.47    4.97
 -10  -4   1   70.95    5.08
  10   4  -1   65.79    4.63
 -10   4   1   65.84    5.16
   9  -4  -1    0.71    0.29
  -9  -4   1    1.63    0.67
   9  -4  -1    0.62    0.40
  -9  -4   1    0.73    0.44
  -9   4   1    1.31    0.50
   9   4  -1    0.74    0.40
  -9   4   1    0.99    0.54
  -8  -4   1   71.60    5.29
   8  -4  -1   71.95    4.69
  -8  -4   1   68.86    5.17
   8  -4  -1   72.03    4.73
   8   4  -1   71.80    4.76
  -8   4   1   72.69    4.67
  -8   4   1   68.24    5.29
   7  -4  -1   35.79    2.62
  -7  -4   1   41.07    2.66
   7  -4  -1   35.08    2.39
   7  -4  -1   37.96    2.40
  -7  -4   1   38.36    2.89
  -7  -4   1   36.66    2.95
  -7   4   1   36.43    2.86
   7   4  -1   35.44    2.65
  -7   4   1   37.04    2.60
  -6  -4   1   -0.15    0.40
   6  -4  -1    1.00    0.22
   6  -4  -1    0.67    0.29
  -6  -4   1    0.99    0.31
  -6  -4   1    0.80    0.42
   6  -4  -1    0.57    0.20
  -6  -4   1    1.14    0.36
  -6   4   1    0.69    0.33
  -6   4   1    0.52    0.25
   6   4  -1    1.04    0.38
  -6   4   1    1.08    0.46
   5  -4  -1    3.16    0.41
  -5  -4   1    3.83    0.54
  -5  -4   1    3.24    0.51
  -5  -4   1    4.35    0.60
   5  -4  -1    3.13    0.50
  -5   4   1    2.99    0.47
  -5   4   1    2.75    0.49
  -5   4   1    3.08    0.61
   5   4  -1    2.96    0.52
  -4  -4   1  145.26   10.37
  -4  -4   1  149.73    9.77
  -4  -4   1  155.49    9.07
   4  -4  -1  153.08    9.57
   4  -4  -1  158.31    9.11
  -4  -4   1  162.35    9.66
   4   4  -1  153.82    9.12
  -4   4   1  146.37   10.25
  -4   4   1  128.45   10.11
  -4   4   1  159.60    9.11
  -3  -4   1   20.13    1.32
   3  -4  -1   19.14    1.39
  -3  -4   1   20.53    1.45
  -3  -4   1   19.08    1.58
  -3  -4   1   18.97    1.45
  -3   4   1   15.82    1.43
  -3   4   1   18.20    1.31
   3   4  -1   21.40    1.37
  -2  -4   1   98.48    5.89
  -2  -4   1   90.01    5.92
   2  -4  -1   95.17    5.85
  -2  -4   1   95.71    6.32
  -2   4   1   77.19    5.83
  -1  -4   1    0.59    0.22
   1  -4  -1    0.32    0.18
  -1  -4   1    1.09    0.27
  -1  -4   1    0.70    0.19
  -1   4   1    0.78    0.32
   0  -4  -1   36.51    2.47
   0  -4   1   38.34    2.47
   0  -4  -1   38.54    2.65
   0  -4   1   38.69    2.41
   0   4   1   34.29    2.64
   0   4  -1   37.44    2.49
   0   4   1   30.66    2.46
   1  -4   1   13.58    0.93
   1  -4   1   13.54    1.02
  -1  -4  -1   14.11    1.05
  -1  -4  -1   13.66    1.15
  -1   4  -1   11.93    1.08
  -2  -4  -1   87.97    6.48
   2  -4   1   93.35    5.98
   2  -4   1   99.00    5.96
  -2  -4  -1   92.19    6.09
  -2  -4  -1   89.29    6.02
  -2   4  -1   97.94    6.02
  -3  -4  -1    0.89    0.24
   3  -4   1    0.67    0.22
  -3  -4  -1    0.26    0.22
   3  -4   1    0.81    0.12
  -3  -4  -1    0.55    0.33
   3  -4   1    1.07    0.21
   3   4   1    0.87    0.27
  -3   4  -1    0.97    0.33
   4  -4   1    8.44    0.61
   4  -4   1    8.17    0.65
  -4  -4  -1    8.96    0.78
   4  -4   1    7.72    0.60
  -4  -4  -1    6.79    0.82
   4  -4   1    8.74    0.77
   4   4   1    8.75    0.81
  -4   4  -1    9.53    0.76
  -4   4  -1    7.51    0.99
   5  -4   1   20.38    1.56
   5  -4   1   20.65    1.46
  -5  -4  -1   23.59    1.68
  -5  -4  -1   24.24    1.60
   5  -4   1   20.63    1.42
   5  -4   1   20.96    1.44
  -5  -4  -1   17.74    1.64
   5   4   1   23.03    1.66
  -5   4  -1   19.14    1.80
   6  -4   1   35.97    2.65
   6  -4   1   39.58    2.64
  -6  -4  -1   39.76    3.00
  -6  -4  -1   40.90    2.69
  -6  -4  -1   38.75    2.90
  -6  -4  -1   32.01    2.75
   6   4   1   36.82    2.71
  -6   4  -1   44.03    3.01
  -7  -4  -1    1.16    0.34
   7  -4   1    2.08    0.53
  -7  -4  -1    0.82    0.37
  -7  -4  -1    2.36    0.63
   7  -4   1    1.11    0.30
   7   4   1    2.26    0.57
  -7   4  -1    1.86    0.61
  -8  -4  -1   63.37    4.32
   8  -4   1   54.39    3.95
  -8  -4  -1   59.71    4.33
   8  -4   1   53.14    3.90
  -8   4  -1   57.84    4.46
   8   4   1   55.43    3.99
  -9  -4  -1    3.39    0.83
  -9  -4  -1    3.87    0.84
   9  -4   1    3.02    0.57
   9  -4   1    3.90    0.78
   9   4   1    4.21    0.84
  -9   4  -1    5.71    0.89
 -10  -4  -1    4.33    0.93
  10  -4   1    3.00    0.73
  10  -4   1    3.16    0.66
 -10   4  -1    2.70    0.85
  10   4   1    4.09    0.91
 -11  -4  -1    1.57    0.70
  11  -4   1    1.92    0.68
  11  -4   1    0.64    0.45
 -11   4  -1    1.26    0.79
  11   4   1    2.14    0.79
  12  -4   1   26.34    2.41
 -12  -4  -1   22.50    2.78
  12   4   1   24.52    2.71
 -12   4  -1   28.58    3.26
  13  -5  -1    3.12    0.91
 -13   5   1    2.78    1.11
  13   5  -1    3.57    1.14
  12  -5  -1    4.53    1.01
 -12  -5   1    5.85    1.21
  12   5  -1    5.29    1.25
 -12   5   1    3.98    1.21
 -11  -5   1    0.10    0.43
  11  -5  -1   -0.01    0.29
  11  -5  -1    0.10    0.42
  11   5  -1    0.50    0.59
 -11   5   1    0.51    0.50
  10  -5  -1   16.09    1.81
  10  -5  -1   15.93    1.42
 -10  -5   1   17.32    2.00
 -10  -5   1   17.72    1.88
  10   5  -1   12.08    1.71
 -10   5   1   23.26    1.90
  -9  -5   1   18.31    2.21
   9  -5  -1   24.84    1.77
   9  -5  -1   24.21    2.01
  -9  -5   1   26.35    2.21
   9   5  -1   25.48    2.10
  -9   5   1   24.60    1.97
  -9   5   1   22.84    2.31
   8  -5  -1    0.27    0.14
  -8  -5   1    0.63    0.32
   8  -5  -1    0.35    0.36
  -8  -5   1    0.13    0.32
   8   5  -1    0.41    0.39
  -8   5   1    0.55    0.33
  -8   5   1    0.40    0.50
  -7  -5   1   61.13    4.23
  -7  -5   1   55.44    3.93
  -7  -5   1   67.93    4.34
   7  -5  -1   56.41    3.83
  -7   5   1   55.58    3.80
   7   5  -1   51.78    3.84
  -7   5   1   54.87    4.32
  -6  -5   1   44.58    3.22
  -6  -5   1   41.52    2.88
  -6  -5   1   43.11    3.04
  -6  -5   1   35.83    2.89
   6  -5  -1   41.90    2.75
   6  -5  -1   40.23    2.76
  -6   5   1   40.19    2.98
  -6   5   1   36.73    3.11
  -6   5   1   39.93    2.74
   6   5  -1   41.75    2.83
  -5  -5   1    9.62    0.94
  -5  -5   1    8.62    1.03
   5  -5  -1   11.71    0.94
   5  -5  -1    9.81    0.89
  -5  -5   1   11.50    1.29
   5  -5  -1   11.02    0.86
   5   5  -1   11.08    0.96
  -5   5   1   11.01    0.92
  -5   5   1    7.61    0.93
  -5   5   1   11.09    1.12
   4  -5  -1   79.38    4.91
  -4  -5   1   83.11    5.26
  -4  -5   1   82.65    5.29
   4  -5  -1   73.34    5.13
   4  -5  -1   81.90    5.51
  -4  -5   1   75.08    5.61
  -4   5   1   72.85    5.49
   4   5  -1   86.21    4.96
  -4   5   1   82.26    4.91
  -4   5   1   77.81    5.50
  -3  -5   1  149.99   11.14
  -3  -5   1  155.65   10.49
  -3  -5   1  155.81   10.40
   3  -5  -1  167.69   10.35
   3  -5  -1  172.69   11.06
  -3   5   1  169.59   11.06
  -3   5   1  168.86    9.73
  -2  -5   1   86.12    5.69
   2  -5  -1   90.12    6.04
   2  -5  -1   85.92    5.65
  -2  -5   1   94.36    6.12
  -2  -5   1   79.58    5.69
  -2   5   1   89.11    6.04
  -1  -5   1    7.19    0.61
   1  -5  -1    7.87    0.72
  -1  -5   1    5.75    0.68
   1  -5  -1    6.42    0.66
  -1  -5   1    8.31    0.71
  -1   5   1    7.15    0.76
   0  -5   1  225.96   14.37
   0  -5   1  222.89   14.49
   0  -5   1  226.03   15.35
   0  -5  -1  226.49   15.38
   0  -5  -1  239.76   14.41
   1  -5   1  184.17   11.97
  -1  -5  -1  193.51   11.97
  -1  -5  -1  196.37   12.81
   1  -5   1  181.56   11.91
  -2  -5  -1    0.57    0.16
   2  -5   1    0.13    0.17
  -2  -5  -1    0.61    0.23
   2  -5   1    0.42    0.10
  -2  -5  -1    0.38    0.32
   2   5   1    0.61    0.26
   3  -5   1  129.76    7.49
  -3  -5  -1  119.31    8.10
  -3  -5  -1  120.96    8.02
   3  -5   1  121.34    7.92
   3  -5   1  130.10    7.91
  -3  -5  -1  115.70    8.61
   3   5   1  133.98    7.60
  -3   5  -1  125.31    7.98
  -4  -5  -1  103.08    7.67
   4  -5   1  111.52    6.71
   4  -5   1  112.69    7.01
  -4  -5  -1  116.95    7.15
  -4  -5  -1  110.68    7.24
   4  -5   1  105.61    7.00
   4   5   1  112.96    6.81
  -4   5  -1  107.53    7.57
  -5  -5  -1   42.49    2.98
   5  -5   1   38.91    2.69
   5  -5   1   39.50    2.73
  -5  -5  -1   44.19    2.88
  -5  -5  -1   41.22    3.16
   5  -5   1   42.31    2.70
  -5  -5  -1   41.47    2.94
   5   5   1   45.92    2.87
  -5   5  -1   36.23    3.11
  -5   5  -1   37.93    2.78
  -6  -5  -1   17.35    1.59
  -6  -5  -1   20.61    1.53
   6  -5   1   19.06    1.37
  -6  -5  -1   18.05    1.66
  -6  -5  -1   18.33    1.60
   6  -5   1   17.95    1.48
   6   5   1   19.31    1.58
  -6   5  -1   18.67    1.75
   7  -5   1   63.51    4.07
  -7  -5  -1   63.49    4.42
  -7  -5  -1   61.35    4.57
   7  -5   1   63.85    4.05
  -7  -5  -1   52.08    4.05
  -7   5  -1   64.68    4.63
   7   5   1   55.51    4.07
   8  -5   1   53.98    3.53
   8  -5   1   46.40    3.45
  -8  -5  -1   54.53    3.84
  -8  -5  -1   48.19    3.89
   8   5   1   47.98    3.55
  -8   5  -1   48.93    3.98
   9  -5   1    0.24    0.38
  -9  -5  -1    0.16    0.35
  -9  -5  -1   -0.03    0.53
   9  -5   1   -0.05    0.20
   9   5   1    0.69    0.40
  10  -5   1   23.68    2.02
  10  -5   1   25.78    2.18
 -10  -5  -1   24.53    2.30
 -10   5  -1   25.21    2.53
  10   5   1   23.86    2.20
  11  -5   1   42.01    3.36
 -11  -5  -1   44.57    3.75
  11  -5   1   45.24    3.44
 -11   5  -1   49.92    4.06
  11   5   1   40.93    3.46
 -12  -5  -1    1.84    0.80
  12  -5   1    2.19    0.75
  12   5   1    1.26    0.81
 -12   5  -1    1.72    0.88
  12  -6  -1    4.46    1.04
  12   6  -1    4.80    1.16
 -12   6   1    3.05    1.13
  11  -6  -1   51.08    3.89
 -11  -6   1   44.82    4.23
  11  -6  -1   55.72    3.80
 -11   6   1   55.95    4.54
  11   6  -1   56.95    4.05
  10  -6  -1    4.41    0.63
  10  -6  -1    4.78    0.94
 -10  -6   1    5.73    1.14
  10   6  -1    4.14    0.91
 -10   6   1    5.25    1.19
   9  -6  -1    0.66    0.22
  -9  -6   1    1.07    0.46
   9  -6  -1    0.76    0.41
  -9  -6   1    1.31    0.58
   9   6  -1    1.10    0.49
  -9   6   1    0.21    0.36
  -9   6   1   -0.19    0.53
   8  -6  -1    6.95    0.52
  -8  -6   1    7.99    1.10
   8  -6  -1    7.39    1.03
  -8  -6   1    4.81    0.81
   8   6  -1    6.74    1.04
  -8   6   1    5.91    0.90
  -8   6   1   10.38    1.22
   7  -6  -1   69.53    4.61
  -7  -6   1   70.06    5.29
  -7  -6   1   74.06    4.83
  -7   6   1   74.78    4.62
  -7   6   1   66.62    5.21
   7   6  -1   68.74    4.67
  -6  -6   1    6.90    0.88
  -6  -6   1    6.76    0.89
   6  -6  -1    7.55    0.71
   6  -6  -1    6.05    0.80
  -6   6   1    6.37    0.80
   6   6  -1    7.00    0.90
   5  -6  -1  132.45    8.11
  -5  -6   1  143.78    8.77
   5  -6  -1  129.64    8.53
  -5  -6   1  126.68    8.63
  -5  -6   1  131.88    9.32
   5  -6  -1  134.65    9.11
  -5   6   1  141.48    8.13
  -5   6   1  129.72    9.09
  -5   6   1  135.87    9.13
   5   6  -1  125.49    8.15
  -4  -6   1   22.11    1.74
   4  -6  -1   22.38    1.77
  -4  -6   1   28.04    1.91
  -4  -6   1   23.94    1.76
   4  -6  -1   21.04    1.57
   4  -6  -1   20.22    1.64
  -4   6   1   22.30    1.58
   4   6  -1   23.85    1.64
  -4   6   1   21.84    1.79
  -4   6   1   20.22    1.81
   3  -6  -1    4.80    0.62
   3  -6  -1    3.16    0.44
  -3  -6   1    3.54    0.63
  -3  -6   1    4.29    0.61
   3  -6  -1    4.08    0.57
  -3   6   1    4.39    0.62
   3   6  -1    5.67    0.58
  -3   6   1    4.14    0.49
  -2  -6   1   -0.16    0.08
  -2  -6   1   -0.14    0.13
   2  -6  -1    0.02    0.14
   2  -6  -1   -0.07    0.14
  -2  -6   1   -0.14    0.14
  -2   6   1   -0.03    0.23
  -1  -6   1  229.81   15.23
  -1  -6   1  231.77   14.26
   1  -6  -1  230.91   15.22
   1  -6  -1  224.13   14.24
  -1   6   1  208.26   15.19
   0  -6   1   23.28    1.76
   0  -6  -1   20.84    1.66
   0  -6  -1   21.17    1.76
   0  -6   1   21.26    1.54
   0  -6   1   23.41    1.66
   0   6   1   22.48    1.83
   1  -6   1    9.07    0.81
  -1  -6  -1    8.36    0.90
  -1  -6  -1    8.01    0.81
   1  -6   1    8.65    0.68
   1  -6   1    9.10    0.82
   2  -6   1    3.82    0.50
  -2  -6  -1    2.76    0.56
  -2  -6  -1    2.98    0.42
   2  -6   1    3.22    0.31
  -2  -6  -1    3.85    0.57
   2  -6   1    3.72    0.49
   3  -6   1  101.85    6.51
  -3  -6  -1   94.12    6.63
  -3  -6  -1  100.90    6.61
   3  -6   1   99.87    6.44
   3  -6   1  103.74    6.93
  -3  -6  -1  100.58    7.10
  -3   6  -1  100.03    6.92
   3   6   1  108.24    6.23
  -4  -6  -1   -0.22    0.23
   4  -6   1    0.33    0.19
   4  -6   1    0.30    0.09
   4  -6   1    0.42    0.17
  -4  -6  -1    0.04    0.31
  -4  -6  -1    0.23    0.22
  -4   6  -1    0.13    0.31
   4   6   1    0.50    0.25
  -5  -6  -1   56.90    4.01
   5  -6   1   53.94    3.78
  -5  -6  -1   57.45    3.95
   5  -6   1   59.57    3.75
   5  -6   1   54.72    3.70
  -5  -6  -1   59.84    4.27
  -5   6  -1   63.48    4.24
   5   6   1   56.59    3.82
  -6  -6  -1    0.32    0.27
   6  -6   1    0.81    0.20
   6  -6   1    0.81    0.33
  -6  -6  -1    1.32    0.39
  -6  -6  -1    1.10    0.50
  -6   6  -1    1.31    0.49
   6   6   1    1.25    0.42
   7  -6   1    0.86    0.39
  -7  -6  -1    0.28    0.27
  -7  -6  -1    0.45    0.32
   7  -6   1    0.31    0.19
  -7  -6  -1    0.80    0.52
   7   6   1    0.10    0.34
  -8  -6  -1    7.37    1.09
   8  -6   1    8.28    0.83
   8  -6   1    8.43    1.11
  -8  -6  -1   10.03    1.39
   8   6   1    6.72    1.10
  -8   6  -1    7.70    1.34
  -9  -6  -1   65.54    4.13
   9  -6   1   45.33    3.63
   9  -6   1   50.77    3.64
  -9   6  -1   46.29    4.17
   9   6   1   50.13    3.76
  10  -6   1    3.60    0.83
  10  -6   1    5.08    0.81
 -10   6  -1    5.47    1.21
  10   6   1    4.32    0.96
  11  -6   1   10.33    1.51
 -11   6  -1   12.49    1.94
  11   6   1   12.13    1.73
  12  -6   1    2.77    0.82
 -12   6  -1    2.15    0.96
  12   6   1    1.47    0.93
  12  -7  -1    2.58    0.84
  12   7  -1    2.22    0.91
 -12   7   1    3.62    1.23
  11  -7  -1    0.27    0.48
 -11  -7   1   -0.12    0.54
  11  -7  -1   -0.24    0.25
  11   7  -1    0.25    0.50
 -11   7   1    0.44    0.66
 -10  -7   1    2.43    0.84
  10  -7  -1    2.43    0.46
  10  -7  -1    4.06    0.81
  10   7  -1    2.17    0.71
 -10   7   1    2.63    0.82
  -9  -7   1   24.27    3.00
   9  -7  -1   30.85    2.50
   9  -7  -1   32.82    2.24
  -9   7   1   44.33    2.94
   9   7  -1   31.22    2.59
  -9   7   1   31.59    2.46
  -8  -7   1   10.71    1.48
  -8  -7   1   10.07    1.21
   8  -7  -1   12.27    1.32
  -8   7   1   10.09    1.52
  -8   7   1   11.17    1.23
   8   7  -1    8.95    1.23
  -7  -7   1   46.86    3.26
   7  -7  -1   41.68    3.03
  -7  -7   1   41.34    3.53
  -7   7   1   45.24    3.56
  -7   7   1   44.34    3.04
   7   7  -1   45.86    3.16
   6  -7  -1   23.31    1.81
   6  -7  -1   24.62    1.83
  -6  -7   1   21.52    1.97
  -6  -7   1   22.35    2.16
  -6  -7   1   25.26    1.97
  -6   7   1   25.71    2.19
  -6   7   1   26.21    1.83
   6   7  -1   25.59    1.91
   5  -7  -1   15.75    1.37
  -5  -7   1   15.81    1.41
   5  -7  -1   17.30    1.28
  -5  -7   1   22.68    1.58
   5  -7  -1   14.91    1.29
  -5  -7   1   14.38    1.40
  -5   7   1   18.15    1.30
  -5   7   1   14.48    1.50
   5   7  -1   17.83    1.35
  -5   7   1   12.67    1.38
  -4  -7   1    4.49    0.59
  -4  -7   1    2.45    0.60
   4  -7  -1    4.34    0.59
   4  -7  -1    4.12    0.57
  -4  -7   1    4.74    0.71
   4  -7  -1    3.65    0.50
   4   7  -1    3.08    0.49
  -4   7   1    3.10    0.59
  -4   7   1    3.09    0.63
  -4   7   1    1.84    0.38
   3  -7  -1  167.16    9.74
  -3  -7   1  157.62   11.24
  -3  -7   1  147.68   10.46
   3  -7  -1  165.12   11.13
   3  -7  -1  160.90   10.44
  -3  -7   1  162.31   10.58
  -3   7   1  168.33   11.16
   3   7  -1  169.51    9.76
  -3   7   1  166.38    9.73
  -2  -7   1    2.62    0.41
   2  -7  -1    2.10    0.44
  -2  -7   1    2.42    0.49
  -2  -7   1    2.82    0.50
   2  -7  -1    3.13    0.51
   1  -7  -1    1.89    0.43
  -1  -7   1    2.04    0.45
  -1  -7   1    1.40    0.29
   1  -7  -1    1.84    0.41
  -1  -7   1    1.45    0.40
   0  -7  -1   16.10    1.44
   0  -7   1   16.23    1.33
   0  -7   1   16.44    1.42
   0  -7  -1   16.45    1.35
   0  -7   1   17.10    1.24
   1  -7   1  324.25   19.94
  -1  -7  -1  319.33   19.98
  -1  -7  -1  321.33   20.14
  -1  -7  -1  303.55   21.36
   1  -7   1  319.76   21.27
   1  -7   1  310.52   20.08
   2  -7   1    0.32    0.12
  -2  -7  -1    0.17    0.25
   2  -7   1    0.45    0.19
  -2  -7  -1    0.57    0.27
   2  -7   1    0.35    0.19
  -2  -7  -1    0.18    0.18
   2   7   1    0.31    0.20
  -3  -7  -1  147.58    9.38
  -3  -7  -1  132.20    9.97
   3  -7   1  150.73    9.80
   3  -7   1  145.00    9.16
   3  -7   1  142.22    9.21
  -3  -7  -1  143.86    9.32
  -4  -7  -1    0.07    0.27
  -4  -7  -1    0.87    0.30
   4  -7   1    0.46    0.12
  -4  -7  -1    0.76    0.30
   4  -7   1    0.56    0.21
   4  -7   1    0.71    0.24
   4  -7   1    0.47    0.23
  -4   7  -1    0.77    0.43
   4   7   1    0.71    0.32
  -5  -7  -1   32.61    2.32
   5  -7   1   29.40    2.10
   5  -7   1   30.71    2.02
  -5  -7  -1   30.50    2.29
   5  -7   1   28.95    2.12
  -5   7  -1   29.20    2.47
   5   7   1   29.25    2.21
  -6  -7  -1    0.54    0.42
  -6  -7  -1    0.36    0.29
  -6  -7  -1   -0.02    0.23
   6  -7   1    0.04    0.11
   6  -7   1    0.35    0.28
  -6   7  -1    0.17    0.43
   6   7   1    0.16    0.28
  -7  -7  -1   98.57    6.95
   7  -7   1  100.91    6.07
  -7  -7  -1   77.59    6.27
   7  -7   1   98.71    6.22
  -7   7  -1   97.09    6.91
   7   7   1   98.71    6.20
   8  -7   1    1.56    0.51
   8  -7   1    1.28    0.35
   8   7   1    0.58    0.45
   9  -7   1   -0.32    0.36
   9  -7   1    0.29    0.24
  -9  -7  -1   -0.51    0.53
  -9   7  -1    0.43    0.51
   9   7   1    0.28    0.43
  10  -7   1    1.22    0.52
  10  -7   1    1.09    0.39
 -10  -7  -1    1.76    0.73
 -10   7  -1    0.41    0.57
  10   7   1    0.99    0.62
  11  -7   1   34.39    2.98
  11   7   1   37.65    3.21
 -11   7  -1   41.27    3.65
  12  -7   1   -0.39    0.52
  12   7   1    0.77    0.81
 -12   7  -1    1.01    0.82
  12  -8  -1    2.62    0.86
  12   8  -1    1.41    0.96
 -12   8   1    1.86    0.91
 -11  -8   1   18.68    2.35
  11  -8  -1   19.31    1.62
  11  -8  -1   20.59    2.17
  11   8  -1   18.78    2.20
 -11   8   1   19.87    2.59
  10  -8  -1    2.10    0.68
 -10  -8   1    1.09    0.64
  10  -8  -1    1.48    0.36
 -10   8   1    0.36    0.50
  10   8  -1    1.25    0.68
  -9  -8   1    0.20    0.42
   9  -8  -1    0.49    0.18
   9  -8  -1    1.38    0.55
  -9   8   1   -0.42    0.44
   9   8  -1    0.60    0.50
  -8  -8   1   12.13    1.45
  -8  -8   1   14.50    1.87
   8  -8  -1   14.05    1.49
  -8   8   1   15.65    1.85
   8   8  -1   12.30    1.48
  -8   8   1   12.92    1.39
  -7  -8   1   48.26    3.46
  -7  -8   1   45.22    3.18
   7  -8  -1   40.22    2.92
  -7   8   1   41.06    3.41
   7   8  -1   47.43    3.08
  -7   8   1   33.09    2.83
  -6  -8   1    8.70    1.22
  -6  -8   1    7.83    1.00
   6  -8  -1    7.06    0.88
   6  -8  -1    8.17    0.93
  -6  -8   1    9.94    1.11
  -6   8   1    8.76    1.23
   6   8  -1    9.15    1.06
  -6   8   1    5.93    0.83
  -5  -8   1   35.66    2.58
   5  -8  -1   36.01    2.63
   5  -8  -1   27.36    2.27
   5  -8  -1   39.09    2.53
  -5  -8   1   34.45    2.61
  -5   8   1   36.62    2.76
  -5   8   1   31.54    2.65
  -4  -8   1   38.08    2.65
   4  -8  -1   34.97    2.58
   4  -8  -1   33.45    2.34
  -4  -8   1   33.61    2.64
  -4  -8   1   35.70    2.91
   4  -8  -1   37.61    2.73
  -4   8   1   36.36    2.77
   4   8  -1   36.65    2.41
  -4   8   1   31.88    2.69
  -4   8   1   37.79    2.38
  -3  -8   1    9.73    1.09
  -3  -8   1    8.31    0.83
  -3  -8   1    9.04    1.15
   3  -8  -1    7.24    0.91
   3  -8  -1    7.19    0.93
  -3   8   1    7.37    0.99
  -3   8   1    8.55    0.70
  -2  -8   1   70.51    5.07
  -2  -8   1   69.36    4.68
   2  -8  -1   68.70    4.99
   2  -8  -1   71.60    4.71
  -2  -8   1   70.02    4.73
  -2   8   1   67.42    5.02
   1  -8  -1   96.01    6.30
  -1  -8   1   91.04    6.72
  -1  -8   1   95.36    6.27
  -1  -8   1   96.08    6.32
   1  -8  -1   98.38    6.73
   0  -8   1   41.20    3.10
   0  -8   1   40.43    2.91
   0  -8  -1   42.11    2.93
   0  -8   1   40.37    2.80
   0  -8  -1   41.01    3.14
  -1  -8  -1    6.42    0.82
   1  -8   1    5.83    0.76
   1  -8   1    4.72    0.50
  -1  -8  -1    5.93    0.57
   1  -8   1    4.85    0.71
  -1  -8  -1    5.22    0.79
  -2  -8  -1  140.13    9.70
  -2  -8  -1  148.17   10.42
   2  -8   1  144.24    9.64
   2  -8   1  149.90    9.61
  -2  -8  -1  164.59    9.78
   2  -8   1  148.45   10.26
   2   8   1  153.87    9.02
   3  -8   1   15.24    1.30
  -3  -8  -1   16.36    1.37
  -3  -8  -1   14.34    1.48
   3  -8   1   15.03    1.09
  -3  -8  -1   15.84    1.29
   3  -8   1   15.79    1.28
   3   8   1   16.50    1.23
  -3   8  -1   12.78    1.35
  -4  -8  -1    0.86    0.33
  -4  -8  -1    0.61    0.27
   4  -8   1    1.66    0.23
   4  -8   1    1.16    0.34
   4   8   1    1.06    0.38
  -4   8  -1    0.92    0.50
  -5  -8  -1   81.91    5.75
  -5  -8  -1   82.83    6.24
   5  -8   1   83.33    5.59
  -5  -8  -1   87.98    5.81
   5  -8   1   84.80    5.50
  -5   8  -1   85.81    6.08
   5   8   1   89.63    5.48
  -6  -8  -1   70.71    5.17
  -6  -8  -1   70.54    4.73
   6  -8   1   70.08    4.46
  -6  -8  -1   54.17    4.66
   6   8   1   71.29    4.55
  -6   8  -1   73.49    5.10
   7  -8   1    0.23    0.17
  -7  -8  -1    0.46    0.39
   7   8   1    0.56    0.37
  -7   8  -1    0.52    0.60
   8  -8   1    5.06    0.64
   8   8   1    4.01    0.89
  -8   8  -1    2.82    0.97
  -9  -8  -1   58.83    4.43
   9  -8   1   52.22    3.76
  -9   8  -1   54.89    4.48
   9   8   1   48.88    3.91
 -10  -8  -1   14.81    1.95
  10  -8   1   15.65    1.43
 -10   8  -1   15.43    2.16
  10   8   1   11.28    1.72
 -11   8  -1    4.90    1.29
  11   8   1    3.18    1.02
 -11  -9   1    2.13    0.89
  11   9  -1    2.35    0.88
 -11   9   1    1.82    0.86
 -10  -9   1   18.97    2.53
  10  -9  -1   22.10    1.69
 -10   9   1   25.62    2.55
  10   9  -1   20.65    2.26
  -9  -9   1    8.95    1.48
  -9   9   1    8.50    1.46
   9   9  -1    6.08    1.10
  -8  -9   1   33.78    2.76
  -8  -9   1   36.28    3.13
  -8   9   1   34.21    3.02
  -7  -9   1    1.23    0.52
  -7   9   1    0.98    0.63
  -6  -9   1   63.39    5.32
  -6  -9   1   91.29    5.49
  -6  -9   1   76.80    5.86
  -6   9   1   84.67    5.72
  -5  -9   1    0.35    0.31
  -5  -9   1    0.11    0.24
   5  -9  -1    0.28    0.26
  -5   9   1    0.31    0.43
  -5   9   1    0.52    0.47
   4  -9  -1    4.47    0.72
  -4  -9   1    6.35    0.93
  -4  -9   1    4.78    0.70
   4  -9  -1    4.92    0.74
  -4  -9   1    3.32    0.75
  -4   9   1    4.95    0.80
   3  -9  -1   12.35    1.17
   3  -9  -1   14.55    1.26
  -3  -9   1   12.60    1.24
  -3  -9   1   12.18    1.14
  -3  -9   1   12.21    1.32
  -3   9   1   12.06    1.32
   2  -9  -1   65.82    4.49
  -2  -9   1   60.89    4.81
  -2  -9   1   66.30    4.47
  -2  -9   1   68.03    4.54
   2  -9  -1   66.14    4.77
   1  -9  -1    0.69    0.29
  -1  -9   1    0.72    0.25
  -1  -9   1    1.25    0.40
   1  -9  -1    0.55    0.27
  -1  -9   1    0.89    0.36
   0  -9  -1   43.48    3.10
   0  -9  -1   43.35    3.32
   0  -9  -1   44.25    2.94
   0  -9   1   42.65    3.10
   0  -9   1   42.57    2.96
   0  -9   1   41.23    3.26
  -1  -9  -1   34.24    2.56
   1  -9   1   34.41    2.65
  -1  -9  -1   31.37    2.40
  -1  -9  -1   34.06    2.74
   1  -9   1   34.72    2.52
   1  -9   1   35.56    2.38
  -2  -9  -1   18.74    1.84
   2  -9   1   20.36    1.74
   2  -9   1   20.76    1.51
  -2  -9  -1   21.35    1.64
   2  -9   1   21.10    1.69
  -2  -9  -1   24.00    1.80
  -3  -9  -1   20.97    1.76
  -3  -9  -1   19.96    1.66
   3  -9   1   21.79    1.68
   3  -9   1   23.22    1.75
   3  -9   1   20.68    1.49
  -3  -9  -1   15.49    2.02
  -3   9  -1   22.35    1.79
   4  -9   1   37.28    2.60
  -4  -9  -1   35.06    2.70
   4  -9   1   36.96    2.41
  -4  -9  -1   40.74    2.71
  -4   9  -1   27.59    2.71
  -5  -9  -1    1.28    0.42
   5  -9   1    0.55    0.29
   5  -9   1    0.42    0.15
  -5  -9  -1    0.76    0.33
  -5  -9  -1    0.23    0.35
  -5   9  -1    0.99    0.57
   5   9   1    0.77    0.41
  -6  -9  -1    2.63    0.57
   6  -9   1    3.19    0.41
  -6  -9  -1    2.30    0.58
  -6   9  -1    3.28    0.80
   6   9   1    2.21    0.61
  -7  -9  -1   23.80    2.26
  -7  -9  -1   24.83    2.07
   7  -9   1   23.92    1.73
   7   9   1   18.48    1.88
  -7   9  -1   25.95    2.32
  -8  -9  -1   -0.08    0.49
   8  -9   1    0.32    0.25
   8   9   1    0.98    0.49
  -8   9  -1   -0.53    0.47
  -9  -9  -1    1.25    0.64
   9  -9   1    3.50    0.60
  -9   9  -1    4.31    1.11
   9   9   1    0.40    0.57
 -10  -9  -1   23.31    2.32
  10   9   1   16.59    2.16
 -10   9  -1   22.77    2.74
 -11  -9  -1    9.34    1.76
 -11   9  -1   11.34    1.95
  11   9   1    6.23    1.41
 -11 -10   1   -0.13    0.47
 -11  10   1    0.37    0.64
 -10 -10   1   10.92    1.76
 -10  10   1    9.11    1.67
  -9 -10   1    5.10    1.17
  -9  10   1    4.88    1.18
  -8 -10   1   60.30    5.01
  -8 -10   1   58.97    4.56
  -8  10   1   69.86    5.05
  -7 -10   1    0.64    0.47
  -7 -10   1    0.45    0.47
  -7  10   1    0.68    0.71
  -6 -10   1   -0.14    0.36
  -6 -10   1    0.42    0.35
   5 -10  -1    0.07    0.22
  -5 -10   1    0.30    0.30
  -5 -10   1   -0.03    0.34
  -5 -10   1    0.18    0.25
  -4 -10   1   99.28    6.51
  -4 -10   1   93.12    6.50
   4 -10  -1  100.64    6.42
  -4 -10   1  100.99    7.04
   4 -10  -1  100.66    6.81
  -4  10   1   80.52    6.79
  -3 -10   1   13.09    1.33
  -3 -10   1   11.82    1.11
  -3 -10   1    9.13    1.24
   3 -10  -1   10.69    1.15
   3 -10  -1   11.81    1.14
  -2 -10   1   60.60    4.73
  -2 -10   1   64.48    4.38
   2 -10  -1   67.38    4.71
   2 -10  -1   61.29    4.39
  -2 -10   1   62.93    4.44
   1 -10  -1    0.23    0.28
  -1 -10   1    0.19    0.24
  -1 -10   1   -0.13    0.23
  -1 -10   1    0.12    0.14
   1 -10  -1    0.10    0.12
   1 -10  -1   -0.07    0.19
   0 -10  -1   68.66    4.90
   0 -10  -1   71.44    4.75
   0 -10   1   72.60    4.92
   0 -10   1   69.59    4.77
   0 -10  -1   72.86    5.26
   0 -10   1   72.15    5.21
   1 -10   1    2.00    0.51
  -1 -10  -1    1.61    0.50
  -1 -10  -1    1.25    0.33
   1 -10   1    1.76    0.47
  -1 -10  -1    2.25    0.55
   1 -10   1    1.03    0.29
   2 -10   1   99.81    6.74
   2 -10   1  102.86    7.15
  -2 -10  -1  101.97    6.83
  -2 -10  -1  102.26    7.31
   2 -10   1   98.56    6.61
  -2 -10  -1  102.95    6.74
  -3 -10  -1    8.25    1.22
  -3 -10  -1   11.23    1.02
   3 -10   1    9.40    0.99
   3 -10   1    8.13    1.03
   3 -10   1    8.35    0.77
  -3 -10  -1   12.03    1.30
  -4 -10  -1    1.70    0.46
  -4 -10  -1    1.20    0.48
   4 -10   1    1.80    0.31
  -4 -10  -1    1.70    0.57
   4 -10   1    1.95    0.49
   5 -10   1    4.44    0.50
  -5 -10  -1    2.67    0.62
  -5 -10  -1    3.51    0.76
  -5  10  -1    3.93    0.98
   6 -10   1   68.86    4.17
  -6 -10  -1   54.12    4.81
  -6 -10  -1   70.10    4.55
  -6 -10  -1   57.95    4.45
  -6  10  -1   56.35    4.72
  -7 -10  -1    5.56    1.01
   7 -10   1    7.08    0.69
  -7 -10  -1    6.13    1.22
  -7  10  -1    5.29    1.13
  -8 -10  -1   16.87    2.23
   8 -10   1   18.72    1.51
  -8  10  -1   19.83    2.43
  -9 -10  -1    0.57    0.52
   9 -10   1   -0.12    0.25
  -9  10  -1   -0.62    0.47
 -10 -10  -1    7.38    1.51
 -10  10  -1   11.04    1.89
 -10 -11   1   36.25    3.54
 -10  11   1   39.85    3.57
  -9 -11   1    0.07    0.60
  -8 -11   1   19.34    2.38
  -7 -11   1    6.69    1.30
  -6 -11   1  128.77    8.64
  -6 -11   1  126.90    9.29
  -5 -11   1    7.20    1.13
  -5 -11   1    9.02    1.32
  -5 -11   1    8.28    1.07
   5 -11  -1    7.65    1.06
  -4 -11   1    1.57    0.58
   4 -11  -1    1.44    0.44
  -4 -11   1    1.65    0.56
   4 -11  -1    1.46    0.49
  -4 -11   1    1.81    0.48
   3 -11  -1    7.55    1.05
  -3 -11   1    7.88    1.09
   3 -11  -1    6.51    0.98
  -3 -11   1    6.80    1.10
   3 -11  -1    6.66    0.60
  -3 -11   1    7.81    0.97
   2 -11  -1  101.38    6.99
   2 -11  -1  106.89    7.22
  -2 -11   1  109.16    7.77
  -2 -11   1  109.81    7.21
   2 -11  -1  113.76    7.72
  -2 -11   1  108.46    7.26
  -1 -11   1   11.16    1.40
  -1 -11   1   11.93    1.09
   1 -11  -1   12.18    1.00
  -1 -11   1   11.83    1.40
   1 -11  -1   13.04    1.31
   1 -11  -1    9.35    1.24
   0 -11  -1    0.21    0.17
   0 -11   1   -0.12    0.22
   0 -11  -1    0.12    0.24
   0 -11   1   -0.08    0.26
   0 -11   1    0.34    0.21
   0 -11  -1    0.49    0.37
  -1 -11  -1   10.65    1.03
   1 -11   1   11.30    1.02
  -1 -11  -1   10.73    1.36
   1 -11   1    9.75    1.25
   1 -11   1   13.14    1.27
  -1 -11  -1   14.17    1.37
   2 -11   1   10.11    1.22
  -2 -11  -1    9.28    1.30
   2 -11   1    8.81    0.84
  -2 -11  -1    9.52    0.96
  -2 -11  -1    8.84    1.16
   2 -11   1   10.19    1.18
   3 -11   1   25.47    1.84
   3 -11   1   25.38    2.06
  -3 -11  -1   25.27    2.12
  -3 -11  -1   26.78    2.04
  -3 -11  -1   22.06    2.25
   3 -11   1   25.09    2.15
  -4 -11  -1    0.66    0.40
  -4 -11  -1    0.40    0.32
   4 -11   1    0.47    0.20
   4 -11   1    0.43    0.32
  -4 -11  -1    0.52    0.31
  -5 -11  -1    6.95    1.10
  -5 -11  -1    5.55    1.09
   5 -11   1    5.54    0.66
  -5 -11  -1    7.52    1.02
  -6 -11  -1    6.21    1.03
   6 -11   1    4.52    0.58
  -6 -11  -1    5.05    0.86
  -6 -11  -1    5.45    1.13
  -7 -11  -1   27.09    2.60
  -7 -11  -1   26.65    2.54
   7 -11   1   26.31    1.98
  -8 -11  -1    2.64    0.85
   8 -11   1    3.03    0.53
  -8  11  -1    3.13    1.05
  -9 -11  -1    2.38    0.79
  -9  11  -1    1.39    0.79
 -10 -11  -1   26.65    2.61
 -10  11  -1   16.88    2.59
  -9 -12   1    0.29    0.57
  -8 -12   1   22.35    2.73
  -7 -12   1    8.48    1.49
  -6 -12   1    2.20    0.72
  -5 -12   1    9.00    1.17
  -5 -12   1    8.92    1.42
   5 -12  -1    6.47    1.06
   5 -12  -1    9.20    0.71
  -4 -12   1   40.56    3.31
   4 -12  -1   38.48    2.94
   4 -12  -1   37.18    2.57
  -4 -12   1   37.10    2.91
  -4 -12   1   37.55    3.02
  -3 -12   1    0.48    0.37
  -3 -12   1    1.34    0.44
   3 -12  -1    1.03    0.47
  -3 -12   1    0.80    0.44
   3 -12  -1    0.97    0.44
   3 -12  -1    1.76    0.32
  -2 -12   1   16.85    1.78
   2 -12  -1   15.65    1.63
   2 -12  -1   18.63    1.76
  -2 -12   1   16.18    1.64
   2 -12  -1   18.64    1.40
  -2 -12   1   20.18    1.61
   1 -12  -1   53.29    4.00
   1 -12  -1   54.15    4.24
  -1 -12   1   56.00    4.27
  -1 -12   1   56.82    3.89
  -1 -12   1   57.39    4.03
   1 -12  -1   52.72    3.75
   0 -12   1   12.94    1.51
   0 -12  -1   12.72    1.52
   0 -12   1   13.91    1.43
   0 -12  -1   13.60    1.65
   0 -12  -1   13.00    1.16
   0 -12   1   13.83    1.21
   1 -12   1   24.25    2.16
  -1 -12  -1   30.01    2.27
  -1 -12  -1   23.94    2.00
   1 -12   1   27.15    2.00
  -1 -12  -1   24.02    2.33
   1 -12   1   27.64    2.29
   2 -12   1   37.96    2.79
   2 -12   1   38.51    2.90
  -2 -12  -1   36.62    2.67
  -2 -12  -1   38.33    3.07
   2 -12   1   35.33    2.55
  -2 -12  -1   26.38    2.66
  -3 -12  -1   24.72    2.32
  -3 -12  -1   19.51    2.04
  -3 -12  -1   23.21    2.00
   3 -12   1   27.01    2.11
   3 -12   1   27.18    1.88
  -4 -12  -1    1.99    0.66
   4 -12   1    0.98    0.46
  -4 -12  -1    1.40    0.59
   4 -12   1    1.82    0.37
  -4 -12  -1    1.13    0.40
  -5 -12  -1   29.30    2.86
   5 -12   1   32.10    2.29
  -5 -12  -1   32.59    2.58
  -6 -12  -1   21.30    2.19
   6 -12   1   18.82    1.52
  -7 -12  -1    7.03    1.36
   7 -12   1    8.22    0.91
  -8 -12  -1    3.04    1.01
  -9 -12  -1   11.63    1.87
  -9 -13   1   10.84    1.86
  -8 -13   1   20.83    2.65
  -7 -13   1   24.21    2.86
  -6 -13   1    0.07    0.46
   6 -13  -1    0.20    0.16
   5 -13  -1    0.67    0.22
  -5 -13   1    1.14    0.58
  -5 -13   1    0.30    0.38
  -4 -13   1    0.45    0.51
   4 -13  -1   -0.13    0.36
  -4 -13   1    0.13    0.32
   4 -13  -1    0.35    0.20
   3 -13  -1   77.71    5.55
   3 -13  -1   80.76    5.25
   3 -13  -1   78.04    5.85
  -3 -13   1   68.26    5.92
  -3 -13   1   87.86    5.58
   2 -13  -1    4.06    0.56
   2 -13  -1    3.11    0.72
  -2 -13   1    3.91    0.72
   2 -13  -1    3.90    0.80
  -2 -13   1    2.35    0.77
   1 -13  -1   16.62    1.71
  -1 -13   1   17.20    1.51
   1 -13  -1   17.68    1.67
  -1 -13   1   16.66    1.73
   1 -13  -1   15.85    1.38
   0 -13   1    0.10    0.23
   0 -13  -1    0.34    0.34
   0 -13   1    0.19    0.29
   0 -13  -1    0.21    0.37
   0 -13  -1   -0.13    0.20
   0 -13   1    0.85    0.38
   1 -13   1   55.57    4.63
  -1 -13  -1   69.26    5.14
   1 -13   1   67.43    4.57
  -1 -13  -1   68.16    4.61
   1 -13   1   69.35    5.02
   2 -13   1    2.42    0.69
   2 -13   1    2.33    0.62
  -2 -13  -1    3.08    0.82
  -2 -13  -1    3.12    0.62
   2 -13   1    2.92    0.54
   3 -13   1   49.42    3.46
  -3 -13  -1   47.57    4.04
   3 -13   1   50.81    3.69
  -3 -13  -1   49.22    3.63
   4 -13   1    0.08    0.34
  -4 -13  -1   -0.17    0.36
   4 -13   1    0.03    0.20
  -4 -13  -1   -0.35    0.27
  -5 -13  -1   38.13    3.23
   5 -13   1   34.77    2.50
  -5 -13  -1   30.90    2.74
   6 -13   1    0.71    0.29
  -6 -13  -1   -0.28    0.42
  -7 -13  -1   44.52    3.95
  -8 -13  -1   -0.17    0.55
  -8 -14   1    4.77    1.21
  -7 -14   1   28.75    2.90
   6 -14  -1    0.43    0.22
  -6 -14   1   -0.34    0.43
   5 -14  -1   37.85    2.57
  -5 -14   1   38.00    2.98
  -5 -14   1   30.60    3.17
  -4 -14   1    6.00    1.17
  -4 -14   1    5.06    0.91
   4 -14  -1    4.72    0.65
  -3 -14   1   12.55    1.77
  -3 -14   1   13.73    1.38
   3 -14  -1   12.28    1.14
   3 -14  -1   13.82    1.67
   2 -14  -1    0.28    0.24
  -2 -14   1   -0.02    0.31
  -2 -14   1    0.12    0.28
   2 -14  -1    0.52    0.37
  -1 -14   1   29.30    2.37
   1 -14  -1   29.11    2.26
  -1 -14   1   30.20    2.69
   1 -14  -1   29.99    2.67
   0 -14   1    0.00    0.24
   0 -14  -1    0.19    0.27
   0 -14  -1   -0.26    0.33
   0 -14   1   -0.03    0.30
  -1 -14  -1    2.46    0.57
  -1 -14  -1    3.08    0.79
   1 -14   1    2.86    0.71
   1 -14   1    2.63    0.57
  -2 -14  -1    0.27    0.45
   2 -14   1   -0.08    0.21
  -2 -14  -1    0.25    0.27
   3 -14   1    9.73    1.16
  -3 -14  -1   12.53    1.72
  -3 -14  -1   13.86    1.49
  -4 -14  -1   -0.32    0.30
   4 -14   1   -0.06    0.21
  -4 -14  -1    0.41    0.38
  -5 -14  -1   19.35    2.42
  -5 -14  -1   18.93    1.82
   5 -14   1   17.95    1.56
  -6 -14  -1   -0.43    0.43
  -7 -14  -1   -0.01    0.54
  -6 -15   1   13.11    2.07
  -5 -15   1   -0.26    0.48
  -4 -15   1    6.13    1.05
  -4 -15   1    8.82    1.44
  -3 -15   1   29.73    2.56
  -3 -15   1   27.67    2.84
   3 -15  -1   33.14    2.35
  -2 -15   1    2.29    0.60
   2 -15  -1    2.24    0.73
   2 -15  -1    2.06    0.48
  -2 -15   1    2.56    0.85
   1 -15  -1    0.44    0.53
  -1 -15   1   -0.06    0.38
  -1 -15   1    0.21    0.29
   1 -15  -1    0.55    0.32
   0 -15  -1   28.88    2.35
   0 -15   1   32.06    2.77
   0 -15   1   27.43    2.36
   0 -15  -1   32.73    2.81
   1 -15   1   39.63    2.91
   1 -15   1   37.21    3.24
  -1 -15  -1   39.51    2.94
  -1 -15  -1   34.60    3.29
  -2 -15  -1    0.07    0.32
  -2 -15  -1    0.07    0.41
  -3 -15  -1   23.89    2.14
  -3 -15  -1   22.50    2.40
  -4 -15  -1   29.19    2.87
  -5 -15  -1    4.22    1.15
  -6 -15  -1    0.51    0.55
  -5 -16   1   -0.08    0.49
  -4 -16   1   16.60    2.24
  -3 -16   1    1.51    0.66
  -2 -16   1    1.88    0.74
   2 -16  -1    0.73    0.53
   1 -16  -1    1.19    0.63
  -1 -16   1    1.16    0.62
   0 -16  -1    3.48    0.92
   0 -16   1    4.19    0.97
   1 -16   1   -0.13    0.42
  -1 -16  -1    0.37    0.53
  -2 -16  -1   21.19    2.28
  -3 -16  -1    2.15    0.91
  -4 -16  -1    5.06    1.20
  -2 -17   1   14.65    1.99
   1 -17  -1   -0.46    0.40
  -1 -17   1   -0.08    0.50
   0 -17   1   16.70    2.17
   0 -17  -1   17.64    2.22
  -1 -17  -1    2.65    0.90
  -2 -17  -1   -0.12    0.43
  13   0  -2   -0.16    0.44
 -13   0   2    0.24    0.53
  12   0  -2   28.60    2.57
 -12   0   2   30.70    2.89
 -11   0   2    0.14    0.40
  11   0  -2    0.07    0.38
 -10   0   2    0.97    0.42
  10   0  -2    1.90    0.63
 -10   0   2    1.16    0.53
  -9   0   2   -0.21    0.27
   9   0  -2    0.22    0.29
  -9   0   2   -0.74    0.45
  -9   0   2   -0.10    0.23
  -8   0   2    1.22    0.49
  -8   0   2    0.15    0.21
   8   0  -2    0.06    0.21
  -7   0   2   -0.13    0.17
  -7   0   2   -0.02    0.33
  -7   0   2   -0.24    0.19
  -7   0   2   -0.48    0.29
   7   0  -2   -0.04    0.20
   6   0  -2   39.87    2.53
  -6   0   2   41.24    2.87
  -6   0   2   38.93    2.58
  -6   0   2   38.26    2.88
   6   0  -2   34.80    2.56
   6   0  -2   41.03    2.56
  -6   0   2   29.40    2.53
   5   0  -2   -0.04    0.11
  -5   0   2    0.23    0.29
  -5   0   2   -0.19    0.14
  -5   0   2    0.16    0.19
   5   0  -2   -0.11    0.16
   5   0  -2   -0.06    0.08
  -5   0   2    0.20    0.22
  -4   0   2   23.22    2.01
   4   0  -2   26.57    1.82
  -4   0   2   27.86    1.83
   4   0  -2   30.66    1.87
  -4   0   2   26.92    1.85
   4   0  -2   25.81    1.78
   3   0  -2    0.01    0.06
  -3   0   2   -0.18    0.08
   3   0  -2    0.09    0.12
  -3   0   2   -0.08    0.13
   2   0  -2  118.05    7.21
   2   0  -2  108.69    7.16
  -1   0   2    0.10    0.08
  -1   0   2   -0.06    0.10
   1   0  -2    0.14    0.10
   1   0  -2   -0.07    0.06
   0   0   2  109.47    7.56
   0   0  -2  106.95    7.43
   0   0   2  139.44    7.45
   1   0   2   -0.07    0.13
   1   0   2   -0.19    0.07
  -1   0  -2    0.02    0.11
  -2   0  -2   71.94    4.73
  -2   0  -2   74.77    4.72
   2   0   2   79.54    4.93
   3   0   2    0.08    0.15
  -3   0  -2    0.05    0.18
   3   0   2   -0.10    0.11
  -3   0  -2    0.04    0.11
  -3   0  -2    0.09    0.11
   4   0   2  284.02   17.70
  -4   0  -2  305.57   17.60
  -4   0  -2  243.56   17.17
   5   0   2   -0.02    0.14
   5   0   2    0.17    0.20
  -5   0  -2    0.15    0.26
  -5   0  -2    0.09    0.20
   6   0   2    0.71    0.29
   6   0   2    0.50    0.32
  -6   0  -2    1.42    0.47
   7   0   2    0.03    0.23
  -7   0  -2    0.09    0.26
   8   0   2   87.03    5.78
  -8   0  -2   88.91    6.39
   9   0   2   -0.04    0.30
  -9   0  -2   -0.30    0.33
 -10   0  -2    9.66    1.51
  10   0   2    7.02    1.17
  11   0   2    0.26    0.40
 -11   0  -2   -0.75    0.44
  12   0   2   11.88    1.74
 -12   0  -2   15.38    2.22
 -13   0  -2   -0.13    0.56
  13  -1  -2    0.95    0.64
 -13  -1   2    2.19    0.87
 -13   1   2    2.08    0.92
  13   1  -2    2.32    0.95
 -12  -1   2    2.64    0.91
  12  -1  -2    2.12    0.77
 -12   1   2    2.74    0.93
  12   1  -2    1.03    0.68
 -11  -1   2    1.94    0.75
  11  -1  -2    2.05    0.65
  11   1  -2    1.29    0.70
 -11   1   2    0.61    0.54
 -10  -1   2   30.25    2.73
  10  -1  -2   32.18    2.54
 -10  -1   2   31.94    2.44
 -10   1   2   30.57    2.41
  10   1  -2   29.09    2.48
 -10   1   2   31.68    2.80
  -9  -1   2   10.00    1.39
  -9  -1   2   10.59    1.23
  -9  -1   2    8.10    1.22
   9  -1  -2   10.09    1.26
  -9   1   2   10.42    1.21
   9   1  -2    8.95    1.22
  -9   1   2    9.49    1.38
  -8  -1   2   23.99    2.17
   8  -1  -2   26.50    2.02
  -8  -1   2   23.29    1.92
  -8  -1   2   25.48    2.21
  -8   1   2   26.99    2.27
   8   1  -2   25.66    2.02
  -8   1   2   29.23    2.15
  -8   1   2   21.15    1.89
  -7  -1   2   15.25    1.11
   7  -1  -2   14.15    1.09
  -7  -1   2   12.34    1.31
   7  -1  -2   13.79    1.07
  -7  -1   2   13.79    1.35
   7  -1  -2   13.80    1.22
  -7  -1   2   13.21    1.17
  -7   1   2   13.43    1.18
  -7   1   2   10.17    1.39
   7   1  -2   12.17    1.19
  -7   1   2   12.63    1.29
  -6  -1   2   86.32    6.23
  -6  -1   2   81.94    5.57
   6  -1  -2   86.08    5.79
  -6  -1   2   92.34    5.79
   6  -1  -2   95.70    5.65
  -6  -1   2   90.71    6.29
   6  -1  -2   87.53    5.72
   6  -1  -2   90.61    5.76
  -6   1   2   86.89    6.26
   6   1  -2   87.39    5.62
  -6   1   2   85.37    5.73
  -6   1   2   87.05    5.60
   6   1  -2   98.72    5.88
  -6   1   2   95.43    6.28
  -5  -1   2   14.20    1.24
   5  -1  -2   13.33    0.94
   5  -1  -2   13.16    1.02
   5  -1  -2   13.44    1.12
  -5  -1   2   13.16    1.11
  -5  -1   2   15.17    1.29
  -5  -1   2   15.57    1.11
   5  -1  -2   13.90    0.95
  -5   1   2   14.39    1.07
   5   1  -2   12.55    1.03
  -5   1   2   13.07    1.10
  -5   1   2   13.08    1.25
   5   1  -2   13.78    1.13
   5   1  -2   14.87    1.07
  -4  -1   2  202.57   14.36
   4  -1  -2  256.65   14.36
  -4  -1   2  198.34   15.40
  -4  -1   2  263.06   13.65
  -4  -1   2  192.04   14.49
   4   1  -2  252.07   14.38
  -4   1   2  269.91   13.67
  -4   1   2  194.77   14.33
   4   1  -2  249.11   14.58
   4   1  -2  249.01   13.66
  -4   1   2  202.81   15.38
   3  -1  -2   53.35    3.41
  -3  -1   2   51.44    3.41
  -3  -1   2   51.03    3.25
  -3  -1   2   52.56    3.70
  -3  -1   2   54.28    3.41
  -3   1   2   49.13    3.39
   3   1  -2   54.79    3.43
  -3   1   2   50.87    3.26
   3   1  -2   54.13    3.42
   2  -1  -2    4.46    0.43
  -2  -1   2    4.95    0.45
  -2  -1   2    5.10    0.44
   2   1  -2    4.44    0.44
  -2   1   2    5.32    0.43
   2   1  -2    4.93    0.42
   1  -1  -2  122.61    7.83
  -1  -1   2  119.22    7.83
   1   1  -2  128.90    7.84
   1   1  -2  127.00    7.94
   0  -1   2   98.10    6.71
   0  -1   2  111.46    6.60
   1  -1   2   92.24    5.30
  -1  -1  -2   75.46    5.31
  -2  -1  -2   22.24    1.51
   2  -1   2   21.91    1.59
   2  -1   2   21.60    1.46
   2   1   2   21.81    1.50
   2   1   2   25.06    1.57
  -2   1  -2   23.58    1.48
  -3  -1  -2    7.39    0.67
   3  -1   2    7.52    0.67
   3  -1   2    7.93    0.69
  -3  -1  -2    6.75    0.58
   3   1   2    8.14    0.71
  -3   1  -2    7.72    0.63
   3   1   2    7.09    0.56
   4  -1   2   24.93    1.90
  -4  -1  -2   24.63    2.03
   4  -1   2   23.58    1.84
  -4  -1  -2   27.99    1.90
  -4  -1  -2   26.06    1.75
   4   1   2   25.77    1.88
   4   1   2   26.43    1.74
  -4   1  -2   27.19    2.10
  -4   1  -2   28.68    1.82
  -5  -1  -2   13.44    1.41
   5  -1   2   19.91    1.47
  -5  -1  -2   16.67    1.55
   5  -1   2   18.71    1.45
  -5  -1  -2   19.67    1.25
  -5  -1  -2   20.08    1.43
   5   1   2   18.16    1.22
  -5   1  -2   17.83    1.59
   5   1   2   19.60    1.48
   6  -1   2   43.14    2.98
  -6  -1  -2   40.80    2.76
   6  -1   2   45.26    3.09
  -6  -1  -2   44.03    3.30
  -6  -1  -2   42.15    3.13
  -6   1  -2   43.99    3.33
   6   1   2   43.64    3.00
   7  -1   2    6.24    0.86
   7  -1   2    5.45    0.85
  -7  -1  -2    7.49    1.05
  -7   1  -2    5.55    0.96
   7   1   2    7.09    0.97
   8  -1   2    8.49    1.16
  -8  -1  -2    9.35    1.28
   8  -1   2    8.22    1.06
   8   1   2    8.74    1.18
  -8   1  -2    7.49    1.23
   9  -1   2   15.09    1.75
  -9  -1  -2   18.96    1.85
  -9   1  -2   18.81    1.87
   9   1   2   14.96    1.75
  10  -1   2    1.20    0.51
 -10  -1  -2    4.29    0.97
  10   1   2    2.49    0.71
 -10   1  -2    6.19    1.20
 -11  -1  -2    0.10    0.56
  11  -1   2   -0.18    0.46
 -11   1  -2   -0.21    0.46
  11   1   2    0.34    0.45
 -12  -1  -2   14.59    2.07
  12  -1   2   11.40    1.67
  12   1   2   12.04    1.72
 -12   1  -2   12.54    2.02
 -13  -1  -2    5.50    1.37
 -13   1  -2    3.19    1.17
 -13  -2   2   24.93    2.86
  13  -2  -2   20.97    2.45
  13   2  -2   17.83    2.38
 -13   2   2   25.35    2.97
 -12  -2   2    2.35    0.81
  12  -2  -2    1.32    0.68
 -12   2   2    1.72    0.77
  12   2  -2    0.61    0.63
  11  -2  -2   10.54    1.43
 -11  -2   2    6.32    1.22
 -11   2   2    7.54    1.37
 -11   2   2    7.10    1.14
  11   2  -2    7.08    1.21
 -10  -2   2    0.52    0.57
 -10  -2   2    0.70    0.46
  10  -2  -2    0.55    0.41
  10   2  -2    0.68    0.43
 -10   2   2    0.49    0.33
 -10   2   2    0.83    0.52
  -9  -2   2   27.01    2.33
   9  -2  -2   25.93    1.97
  -9  -2   2   24.14    2.27
   9  -2  -2   27.94    2.16
  -9  -2   2   24.55    2.01
  -9   2   2   26.13    2.38
  -9   2   2   26.12    2.06
   9   2  -2   24.62    2.10
  -8  -2   2    0.34    0.26
   8  -2  -2    0.45    0.31
   8  -2  -2    0.14    0.17
  -8  -2   2    0.35    0.29
  -8  -2   2    0.51    0.46
  -8  -2   2    0.30    0.23
  -8   2   2    0.45    0.30
   8   2  -2    0.23    0.27
  -8   2   2   -0.23    0.38
  -7  -2   2    0.80    0.37
  -7  -2   2    0.76    0.41
   7  -2  -2    0.32    0.15
  -7  -2   2    0.67    0.25
  -7  -2   2    1.03    0.34
   7  -2  -2    0.79    0.29
  -7   2   2    0.45    0.31
   7   2  -2   -0.04    0.23
  -7   2   2    0.54    0.40
  -7   2   2    0.57    0.40
  -6  -2   2   37.21    2.82
  -6  -2   2   40.40    2.55
  -6  -2   2   35.42    2.48
   6  -2  -2   36.71    2.53
   6  -2  -2   33.93    2.43
  -6  -2   2   36.22    2.78
  -6   2   2   31.89    2.78
  -6   2   2   37.62    2.52
  -6   2   2   37.89    2.75
   6   2  -2   37.65    2.54
  -5  -2   2  103.02    6.06
  -5  -2   2   85.40    6.50
  -5  -2   2   89.89    5.74
  -5  -2   2   97.59    6.03
   5  -2  -2   91.58    5.77
  -5  -2   2   91.04    6.39
   5  -2  -2   90.03    5.94
  -5   2   2   93.63    5.76
  -5   2   2   93.85    6.44
  -5   2   2   92.10    6.44
   5   2  -2   94.77    5.78
  -4  -2   2   21.84    1.39
  -4  -2   2   20.70    1.38
  -4  -2   2   19.36    1.34
  -4  -2   2   18.96    1.55
   4  -2  -2   18.84    1.32
   4   2  -2   18.21    1.34
  -4   2   2   17.46    1.33
  -4   2   2   14.11    1.43
   3  -2  -2   47.90    3.16
  -3  -2   2   47.63    3.03
  -3  -2   2   52.15    3.21
  -3  -2   2   40.06    3.41
  -3  -2   2   50.49    3.22
   3   2  -2   51.31    3.20
   3   2  -2   52.20    3.06
  -3   2   2   46.23    3.03
   2  -2  -2   75.89    4.94
  -2  -2   2   71.83    4.98
  -2  -2   2   74.54    4.94
   2   2  -2   86.61    4.97
  -1  -2   2   40.49    2.61
  -1  -2   2   38.67    2.62
   1   2  -2   39.47    2.62
   0  -2   2    2.64    0.34
   0  -2  -2    4.14    0.44
   0  -2   2    4.34    0.38
   0   2   2    4.24    0.44
   0   2  -2    3.64    0.43
   1  -2   2   32.05    2.20
   1  -2   2   32.29    2.15
  -1  -2  -2   35.31    2.19
  -1   2  -2   32.31    2.16
   1   2   2   32.36    2.19
   2  -2   2    0.13    0.09
  -2  -2  -2    0.14    0.11
   2  -2   2   -0.04    0.10
   2   2   2    0.21    0.12
  -2   2  -2    0.04    0.15
   2   2   2   -0.18    0.11
   3  -2   2    9.28    0.81
  -3  -2  -2   10.02    0.78
   3  -2   2    9.15    0.66
   3  -2   2    9.67    0.79
  -3  -2  -2    7.38    0.88
  -3  -2  -2    8.31    0.80
   3   2   2   11.55    0.77
   3   2   2   10.07    0.87
  -3   2  -2   10.28    0.71
  -3   2  -2   10.46    0.70
  -4  -2  -2  113.12    7.68
  -4  -2  -2  130.11    7.91
   4  -2   2  123.95    7.43
  -4  -2  -2  123.33    8.32
   4  -2   2  123.40    7.88
   4   2   2  121.72    7.69
  -4   2  -2  112.84    8.28
   4   2   2  124.70    7.48
   5  -2   2   88.84    6.06
  -5  -2  -2  100.13    6.08
   5  -2   2   88.10    5.75
  -5  -2  -2   89.07    6.35
  -5  -2  -2   92.69    5.86
  -5   2  -2   96.11    6.44
   5   2   2   90.42    5.84
   5   2   2   88.38    5.78
  -6  -2  -2   14.44    1.43
   6  -2   2   13.70    1.27
   6  -2   2   14.65    1.32
  -6  -2  -2   18.21    1.16
  -6  -2  -2   16.40    1.43
   6   2   2   13.56    1.33
  -6   2  -2   16.20    1.54
   7  -2   2   27.88    2.24
   7  -2   2   29.85    2.26
  -7  -2  -2   29.49    2.43
  -7  -2  -2   26.30    2.32
   7   2   2   32.73    2.34
  -7   2  -2   33.53    2.58
  -8  -2  -2   45.73    3.75
   8  -2   2   48.04    3.44
   8  -2   2   44.27    3.49
  -8   2  -2   56.73    3.94
   8   2   2   50.95    3.52
   9  -2   2    0.41    0.29
   9  -2   2   -0.15    0.26
  -9  -2  -2    0.37    0.41
  -9   2  -2    0.46    0.53
   9   2   2    0.41    0.47
  10  -2   2    3.96    0.84
 -10  -2  -2    3.90    0.93
 -10   2  -2    3.47    0.94
  10   2   2    4.44    0.99
  11  -2   2   12.90    1.67
 -11  -2  -2   14.41    2.01
 -11   2  -2    9.52    1.68
  11   2   2   12.58    1.74
  12  -2   2   17.66    2.14
 -12  -2  -2   21.36    2.56
  12   2   2   15.21    2.11
 -12   2  -2   20.56    2.72
  13  -3  -2   14.29    1.95
 -13   3   2   18.81    2.54
  13   3  -2   16.24    2.18
 -12  -3   2    0.80    0.57
  12  -3  -2   -0.22    0.36
 -12   3   2    0.34    0.51
  12   3  -2    0.36    0.64
  11  -3  -2   36.11    2.77
 -11  -3   2   35.72    3.01
 -11   3   2   31.04    2.62
  11   3  -2   26.07    2.65
 -11   3   2   39.35    3.21
 -10  -3   2   20.23    2.03
  10  -3  -2   19.13    1.63
  10  -3  -2   19.30    2.05
 -10  -3   2   19.81    2.00
  10   3  -2   20.27    1.86
 -10   3   2   19.11    2.35
 -10   3   2   22.13    1.81
  -9  -3   2    7.58    1.17
  -9  -3   2    8.13    1.20
   9  -3  -2    7.31    0.73
   9  -3  -2    7.26    1.07
  -9  -3   2    5.22    0.88
  -9   3   2    6.42    1.19
   9   3  -2    6.43    1.01
  -9   3   2    5.66    0.90
   8  -3  -2    0.19    0.17
  -8  -3   2    0.40    0.29
  -8  -3   2    0.90    0.49
  -8  -3   2    0.16    0.33
   8  -3  -2    0.03    0.28
  -8  -3   2    0.80    0.31
  -8   3   2   -0.03    0.40
   8   3  -2    0.46    0.34
  -8   3   2    0.54    0.32
   7  -3  -2   57.26    3.74
  -7  -3   2   56.56    4.15
   7  -3  -2   53.44    3.74
  -7  -3   2   61.45    3.84
  -7  -3   2   55.77    4.21
  -7  -3   2   51.80    3.68
  -7   3   2   49.57    4.16
   7   3  -2   56.33    3.78
  -7   3   2   51.02    3.71
  -7   3   2   66.24    4.08
  -6  -3   2   13.86    1.18
   6  -3  -2   15.68    1.15
  -6  -3   2   14.18    1.22
  -6  -3   2   15.23    1.34
  -6  -3   2   16.41    1.22
  -6  -3   2   14.72    1.40
   6  -3  -2   14.58    1.23
  -6   3   2   15.67    1.33
   6   3  -2   13.13    1.20
  -6   3   2   13.70    1.20
  -6   3   2   12.73    1.36
   5  -3  -2    4.97    0.48
  -5  -3   2    4.03    0.67
   5  -3  -2    4.24    0.60
   5  -3  -2    4.49    0.52
  -5  -3   2    3.88    0.55
  -5  -3   2    4.08    0.56
  -5  -3   2    4.02    0.55
  -5   3   2    3.46    0.68
  -5   3   2    5.14    0.66
  -5   3   2    4.26    0.57
   5   3  -2    4.13    0.60
   4  -3  -2   28.72    2.06
   4  -3  -2   29.11    2.04
  -4  -3   2   29.40    1.99
  -4  -3   2   32.09    2.13
  -4  -3   2   29.19    2.11
  -4  -3   2   30.91    2.33
  -4   3   2   28.53    2.19
   4   3  -2   31.50    2.03
  -4   3   2   28.78    2.01
  -3  -3   2    5.05    0.49
  -3  -3   2    5.88    0.73
   3  -3  -2    6.23    0.55
  -3  -3   2    5.72    0.57
  -3  -3   2    6.16    0.55
  -3   3   2    4.80    0.55
   3   3  -2    4.61    0.53
  -3   3   2    3.95    0.57
  -2  -3   2   19.99    1.52
  -2  -3   2   22.89    1.55
   2  -3  -2   21.11    1.53
  -2  -3   2   19.82    1.64
   2   3  -2   22.87    1.56
   1  -3  -2  172.64    9.47
  -1  -3   2  130.99    9.53
   1   3  -2  145.72    9.45
   0  -3   2    5.17    0.50
   0  -3   2    5.33    0.53
   0  -3  -2    5.69    0.52
   0   3   2    5.74    0.54
   0   3  -2    6.27    0.63
  -1  -3  -2   57.82    3.76
  -1  -3  -2   51.12    4.03
   1  -3   2   58.61    3.77
   1  -3   2   60.47    3.73
   1   3   2   57.08    4.04
   1   3   2   57.29    3.76
  -1   3  -2   59.70    3.75
   2  -3   2    0.02    0.09
  -2  -3  -2    0.15    0.21
   2  -3   2    0.04    0.09
  -2  -3  -2    0.15    0.11
   2   3   2   -0.12    0.12
  -2   3  -2   -0.08    0.20
   2   3   2    0.06    0.17
   2   3   2    0.03    0.12
  -3  -3  -2  141.44    9.71
   3  -3   2  152.70    8.59
  -3  -3  -2  122.79    9.17
   3  -3   2  141.47    8.93
   3  -3   2  144.18    9.14
  -3  -3  -2  137.82    9.03
   3   3   2  151.50    8.66
   3   3   2  156.40    9.05
  -3   3  -2  136.91    8.96
  -4  -3  -2    4.16    0.55
   4  -3   2    3.47    0.30
   4  -3   2    3.45    0.44
  -4  -3  -2    1.76    0.42
   4  -3   2    3.80    0.55
   4   3   2    3.75    0.61
  -4   3  -2    3.14    0.66
  -4   3  -2    4.45    0.40
   4   3   2    3.93    0.47
  -5  -3  -2   70.48    4.98
   5  -3   2   69.18    4.46
  -5  -3  -2   61.58    4.87
   5  -3   2   71.66    4.66
  -5  -3  -2   72.37    4.55
  -5  -3  -2   73.52    4.72
   5   3   2   70.06    4.59
  -5   3  -2   71.85    5.04
   5   3   2   65.49    4.49
  -6  -3  -2    4.56    0.76
  -6  -3  -2    4.45    0.69
   6  -3   2    4.88    0.75
  -6  -3  -2    4.81    0.76
   6  -3   2    4.72    0.62
  -6   3  -2    4.43    0.86
   6   3   2    4.24    0.74
   7  -3   2   37.69    2.67
   7  -3   2   37.62    2.66
  -7  -3  -2   37.38    2.87
  -7   3  -2   36.05    2.99
   7   3   2   31.56    2.63
  -8  -3  -2    0.73    0.40
   8  -3   2    0.91    0.35
   8  -3   2    1.83    0.56
  -8   3  -2    1.03    0.53
   8   3   2    1.08    0.48
  -9  -3  -2   65.73    4.82
   9  -3   2   60.44    4.34
   9  -3   2   59.21    4.45
   9   3   2   61.83    4.41
  -9   3  -2   66.95    4.86
 -10  -3  -2    0.55    0.57
  10  -3   2    0.99    0.44
  10  -3   2    1.55    0.61
  10   3   2    0.45    0.49
 -10   3  -2    1.55    0.71
  11  -3   2    0.65    0.39
  11  -3   2    0.70    0.60
 -11  -3  -2    1.41    0.70
 -11   3  -2    0.33    0.60
  11   3   2    0.71    0.61
  12  -3   2    0.48    0.47
 -12  -3  -2    0.18    0.45
  12   3   2    0.05    0.64
 -12   3  -2   -0.13    0.58
  13  -4  -2   24.92    2.59
  13   4  -2   17.08    2.35
 -13   4   2   20.22    2.72
  12  -4  -2    7.78    1.35
 -12   4   2    6.99    1.40
  12   4  -2    6.02    1.23
  11  -4  -2   17.89    1.54
  11  -4  -2   18.51    2.01
 -11  -4   2   19.95    1.97
 -11   4   2   17.17    2.23
 -11   4   2   13.20    1.72
  11   4  -2   16.30    1.97
  10  -4  -2    7.20    1.12
 -10  -4   2    7.32    1.18
  10  -4  -2    5.66    0.78
  10   4  -2    5.90    1.06
 -10   4   2    6.75    1.05
 -10   4   2    6.48    1.25
   9  -4  -2   84.30    5.44
  -9  -4   2   90.18    6.15
   9  -4  -2   79.74    5.44
  -9  -4   2   80.02    5.99
  -9   4   2   80.89    6.15
   9   4  -2   76.77    5.45
  -9   4   2   84.35    5.43
  -8  -4   2    1.95    0.62
  -8  -4   2    1.45    0.42
   8  -4  -2    1.95    0.57
  -8  -4   2    1.42    0.44
   8  -4  -2    1.75    0.22
  -8  -4   2    1.56    0.55
  -8   4   2    1.76    0.47
   8   4  -2    1.27    0.47
  -7  -4   2    0.83    0.32
   7  -4  -2    0.82    0.25
   7  -4  -2    0.11    0.27
  -7  -4   2    0.34    0.27
   7   4  -2    0.61    0.31
  -7   4   2    1.04    0.48
  -7   4   2    0.34    0.37
  -7   4   2    0.61    0.30
  -6  -4   2   40.67    2.70
  -6  -4   2   33.58    2.32
  -6  -4   2   33.83    2.43
  -6  -4   2   29.74    2.43
   6  -4  -2   32.58    2.33
   6  -4  -2   32.12    2.36
  -6   4   2   34.59    2.37
   6   4  -2   34.14    2.39
  -6   4   2   33.60    2.56
  -6   4   2   34.83    2.71
  -5  -4   2  226.01   13.05
  -5  -4   2  212.99   14.02
   5  -4  -2  225.42   13.77
  -5  -4   2  216.94   14.88
  -5  -4   2  227.00   13.85
   5  -4  -2  220.26   13.09
  -5   4   2  229.06   13.09
  -5   4   2  200.91   14.56
   5   4  -2  221.52   13.09
  -5   4   2  202.84   14.71
  -4  -4   2   16.65    1.20
  -4  -4   2   15.45    1.32
  -4  -4   2   14.45    1.06
  -4  -4   2   11.07    1.13
   4  -4  -2   14.19    1.10
   4   4  -2   14.62    1.10
  -4   4   2   12.89    1.26
  -4   4   2   13.51    1.22
  -4   4   2   13.46    1.09
   3  -4  -2   63.12    4.43
  -3  -4   2   69.08    4.84
  -3  -4   2   72.95    4.51
  -3  -4   2   67.64    4.51
  -3   4   2   66.91    4.19
  -3   4   2   68.98    4.76
   2  -4  -2   70.12    4.89
  -2  -4   2   78.68    4.63
  -2  -4   2   72.15    4.93
   2  -4  -2   69.62    4.57
  -2  -4   2   66.80    4.61
  -2   4   2   64.08    4.87
  -1  -4   2  173.98   10.47
  -1  -4   2  143.19   10.54
   1  -4  -2  178.44   11.21
  -1  -4   2  174.68   11.18
   1  -4  -2  174.38   10.47
  -1   4   2  147.72   11.16
   0  -4   2   12.00    0.89
   0  -4   2   10.46    0.83
   0  -4  -2   10.34    0.88
   0  -4  -2   10.40    0.96
   0   4   2   10.49    0.98
  -1  -4  -2   17.37    1.25
   1  -4   2   15.87    1.21
   1  -4   2   15.04    1.17
  -1  -4  -2   18.16    1.40
   1   4   2   16.44    1.36
  -1   4  -2   16.61    1.29
  -2  -4  -2    0.37    0.29
   2  -4   2    0.34    0.12
   2  -4   2    0.48    0.16
  -2  -4  -2    0.25    0.19
   2   4   2    0.28    0.17
  -2   4  -2    0.54    0.31
   3  -4   2    3.27    0.39
  -3  -4  -2    2.69    0.45
  -3  -4  -2    3.70    0.48
   3  -4   2    3.07    0.45
   3  -4   2    3.74    0.42
  -3   4  -2    4.54    0.54
   3   4   2    3.31    0.51
  -3   4  -2    2.83    0.63
   4  -4   2    1.65    0.36
   4  -4   2    1.22    0.22
  -4  -4  -2    1.69    0.34
  -4  -4  -2    1.60    0.44
   4  -4   2    1.19    0.25
  -4  -4  -2    1.31    0.35
  -4   4  -2    1.55    0.50
   4   4   2    0.97    0.33
  -4   4  -2    1.92    0.37
  -5  -4  -2   14.22    1.09
   5  -4   2   13.30    0.91
   5  -4   2   11.66    1.10
  -5  -4  -2   13.25    1.27
   5  -4   2   12.93    1.06
  -5  -4  -2   11.90    1.17
  -5  -4  -2   11.74    1.16
  -5   4  -2   12.66    0.99
   5   4   2   12.83    1.19
  -5   4  -2   18.53    1.36
  -6  -4  -2   -0.06    0.38
   6  -4   2    0.24    0.25
   6  -4   2    0.60    0.24
  -6  -4  -2    0.21    0.24
  -6  -4  -2    0.53    0.23
  -6  -4  -2    0.32    0.41
  -6   4  -2    0.91    0.51
   6   4   2    0.57    0.32
  -7  -4  -2   30.08    2.52
  -7  -4  -2   28.54    2.44
   7  -4   2   32.66    2.32
   7  -4   2   28.29    2.24
  -7   4  -2   33.86    2.67
   7   4   2   30.52    2.36
  -8  -4  -2    1.27    0.58
   8  -4   2    1.11    0.47
   8  -4   2    1.11    0.37
  -8  -4  -2    1.69    0.53
  -8   4  -2    0.87    0.50
   8   4   2    0.88    0.46
   9  -4   2   -0.04    0.31
  -9  -4  -2    0.78    0.47
   9  -4   2    0.52    0.31
  -9   4  -2    0.31    0.42
   9   4   2    0.17    0.34
 -10  -4  -2    7.97    1.31
  10  -4   2    5.63    1.07
  10  -4   2    6.41    0.97
  10   4   2    7.24    1.18
 -10   4  -2    7.74    1.40
  11  -4   2   26.21    2.40
 -11  -4  -2   29.43    2.68
 -11   4  -2   24.77    3.03
  11   4   2   26.37    2.48
 -12  -4  -2    0.40    0.68
  12  -4   2    0.97    0.51
 -12   4  -2   -0.40    0.67
  12   4   2    0.82    0.82
  13  -5  -2    8.87    1.45
 -13   5   2    6.16    1.54
  13   5  -2    6.47    1.46
  12  -5  -2    0.42    0.50
  12   5  -2    1.13    0.76
 -12   5   2    1.01    0.67
  11  -5  -2    3.68    0.65
 -11  -5   2    2.59    0.81
  11  -5  -2    3.76    0.92
 -11   5   2    3.90    1.08
 -11   5   2    4.24    0.90
  11   5  -2    3.30    0.90
 -10  -5   2    7.34    1.22
  10  -5  -2    5.16    0.96
  10  -5  -2    6.40    0.75
 -10   5   2    5.81    1.22
  10   5  -2    6.86    1.13
 -10   5   2    5.51    0.94
   9  -5  -2    0.41    0.32
   9   5  -2    0.06    0.31
  -9   5   2    0.28    0.40
  -8  -5   2    7.97    0.98
   8  -5  -2    8.05    1.10
   8   5  -2    8.36    1.12
  -8   5   2   10.72    1.19
  -7  -5   2   30.65    2.72
  -7  -5   2   36.22    2.45
   7  -5  -2   32.73    2.30
  -7  -5   2   34.12    2.31
   7  -5  -2   34.34    2.37
   7   5  -2   34.42    2.41
  -7   5   2   29.39    2.49
  -7   5   2   28.81    2.65
  -7   5   2   30.40    2.32
   6  -5  -2   -0.11    0.20
  -6  -5   2   -0.61    0.35
   6  -5  -2    0.25    0.18
  -6  -5   2    0.09    0.22
  -6  -5   2    0.08    0.20
  -6   5   2    0.43    0.28
  -6   5   2   -0.01    0.37
   6   5  -2    0.36    0.26
  -6   5   2    0.35    0.32
  -5  -5   2   70.51    4.69
  -5  -5   2   68.06    4.73
  -5  -5   2   68.55    4.37
   5  -5  -2   67.38    4.42
   5  -5  -2   71.22    4.61
  -5   5   2   71.05    4.96
  -5   5   2   70.25    4.99
  -5   5   2   68.24    4.42
   5   5  -2   74.61    4.46
  -4  -5   2   53.13    4.54
  -4  -5   2   62.10    4.26
  -4  -5   2   69.70    4.31
  -4  -5   2   64.93    3.94
   4  -5  -2   62.83    4.19
  -4   5   2   61.90    3.97
   4   5  -2   71.63    4.01
  -4   5   2   63.21    4.49
  -4   5   2   59.81    4.45
  -3  -5   2   96.25    6.62
  -3  -5   2   94.21    6.19
   3  -5  -2   90.08    6.10
   3  -5  -2   91.30    6.53
  -3  -5   2   97.29    6.16
  -3   5   2   96.04    5.74
  -3   5   2   94.75    6.53
   2  -5  -2  179.59   11.99
  -2  -5   2  183.98   12.03
  -2  -5   2  169.93   11.34
  -2  -5   2  186.44   11.25
   2  -5  -2  175.85   11.21
  -2   5   2  164.61   11.97
  -1  -5   2   67.18    4.37
  -1  -5   2   65.11    4.36
   1  -5  -2   63.84    4.66
  -1  -5   2   67.46    4.65
   1  -5  -2   67.33    4.37
  -1   5   2   65.37    4.67
   0  -5   2    8.56    0.74
   0  -5  -2    9.97    0.91
   0  -5   2    9.25    0.82
   0  -5   2    9.01    0.83
   0  -5  -2    9.72    0.83
   0   5   2    8.65    0.92
  -1  -5  -2    6.21    0.74
   1  -5   2    6.72    0.57
   1  -5   2    6.04    0.63
  -1  -5  -2    6.37    0.82
   1   5   2    6.87    0.62
   1   5   2    7.85    0.88
   2  -5   2  208.86   12.79
   2  -5   2  203.07   12.91
  -2  -5  -2  206.14   12.86
  -2  -5  -2  194.14   13.76
   2   5   2  200.70   12.11
   3  -5   2   52.92    3.31
   3  -5   2   53.18    3.47
  -3  -5  -2   51.39    3.58
  -3  -5  -2   54.41    3.57
   3  -5   2   56.12    3.48
  -3  -5  -2   49.85    3.86
   3   5   2   50.24    3.43
  -3   5  -2   51.12    3.81
   4  -5   2   14.18    1.09
  -4  -5  -2   15.09    1.26
   4  -5   2   15.24    1.16
   4  -5   2   14.20    1.11
  -4  -5  -2   20.81    1.46
  -4  -5  -2   15.94    1.24
  -4   5  -2   12.96    1.20
   4   5   2   13.91    1.22
  -4   5  -2   13.38    1.40
  -5  -5  -2   46.77    3.33
   5  -5   2   42.79    3.05
  -5  -5  -2   45.40    3.23
  -5  -5  -2   46.68    3.38
   5  -5   2   46.73    3.18
   5  -5   2   44.45    3.11
  -5  -5  -2   57.49    3.52
  -5   5  -2   47.44    3.62
   5   5   2   48.83    3.25
   6  -5   2   98.61    6.64
  -6  -5  -2   85.16    6.73
  -6  -5  -2  104.92    6.99
  -6  -5  -2  104.86    7.22
  -6  -5  -2  110.00    6.63
   6  -5   2  103.40    6.37
  -6   5  -2   99.48    7.20
   6   5   2  103.47    6.49
  -7  -5  -2    9.80    1.17
  -7  -5  -2    6.62    1.08
   7  -5   2    7.90    0.93
   7  -5   2    8.86    1.11
  -7   5  -2    9.60    1.35
   7   5   2    9.40    1.24
   8  -5   2    4.05    0.77
   8  -5   2    3.77    0.62
  -8  -5  -2    4.06    0.78
   8   5   2    4.14    0.89
  -8   5  -2    3.96    0.88
   9  -5   2   48.70    3.48
  -9  -5  -2   49.66    3.81
   9  -5   2   44.36    3.47
  -9   5  -2   54.86    4.00
   9   5   2   42.39    3.50
  10  -5   2   52.32    3.82
 -10  -5  -2   54.75    4.20
  10  -5   2   54.11    3.91
 -10   5  -2   55.02    4.44
  10   5   2   44.80    3.85
 -11  -5  -2    0.65    0.59
  11  -5   2    0.33    0.50
  11   5   2    0.58    0.67
 -11   5  -2    0.13    0.61
 -12  -5  -2    4.96    1.14
  12  -5   2    4.86    1.00
  12   5   2    2.63    1.08
 -12   5  -2    5.01    1.33
  12  -6  -2   39.76    3.26
  12   6  -2   39.82    3.38
 -12   6   2   40.58    3.74
  11  -6  -2    9.64    1.39
  11  -6  -2    8.58    1.02
 -11  -6   2   10.46    1.50
  11   6  -2   11.71    1.60
 -11   6   2    9.30    1.61
 -11   6   2    7.63    1.22
 -10  -6   2   11.78    1.63
  10  -6  -2    9.75    1.35
  10  -6  -2    9.39    0.86
 -10   6   2   10.61    1.65
 -10   6   2    9.54    1.30
  10   6  -2    7.91    1.28
  -9  -6   2   30.48    2.30
   9  -6  -2   19.89    1.92
  -9   6   2   23.76    1.98
  -9   6   2   23.38    2.36
   9   6  -2   22.95    2.04
   8  -6  -2   32.52    2.43
  -8  -6   2   32.48    2.46
  -8   6   2   33.57    2.40
  -8   6   2   24.54    2.70
   8   6  -2   36.83    2.52
   7  -6  -2    1.59    0.43
  -7  -6   2    2.60    0.57
   7   6  -2    3.14    0.65
  -7   6   2    2.62    0.54
  -7   6   2    3.04    0.76
   6  -6  -2   94.77    5.88
   6  -6  -2   91.58    5.66
  -6  -6   2   89.86    5.97
  -6  -6   2   78.65    5.99
  -6  -6   2   94.59    6.51
   6  -6  -2   92.31    6.28
  -6   6   2   77.07    6.24
  -6   6   2   88.59    6.35
   6   6  -2  100.13    5.72
  -6   6   2   91.22    5.65
   5  -6  -2   33.16    2.67
  -5  -6   2   43.41    2.85
   5  -6  -2   32.64    2.49
  -5  -6   2   38.21    2.63
   5  -6  -2   35.03    2.42
  -5  -6   2   35.97    2.62
   5   6  -2   34.67    2.73
  -5   6   2   35.30    2.71
  -5   6   2   33.98    2.75
   5   6  -2   38.18    2.46
  -5   6   2   32.97    2.40
  -4  -6   2    2.02    0.34
  -4  -6   2    2.23    0.44
   4  -6  -2    2.66    0.47
  -4  -6   2    0.95    0.41
   4  -6  -2    1.22    0.32
  -4   6   2    2.10    0.48
  -4   6   2    1.94    0.37
  -4   6   2    2.12    0.52
  -3  -6   2    2.55    0.53
  -3  -6   2    3.01    0.47
  -3  -6   2    2.02    0.46
   3  -6  -2    2.60    0.46
   3  -6  -2    2.19    0.41
  -3   6   2    2.03    0.36
  -2  -6   2  151.51    9.98
  -2  -6   2  167.45   10.70
   2  -6  -2  156.15    9.95
   2  -6  -2  159.57   10.65
  -2  -6   2  143.70   10.03
  -2   6   2  156.28   10.63
  -1  -6   2   92.57    6.57
   1  -6  -2   94.91    6.59
  -1  -6   2  100.88    6.18
   1  -6  -2   97.11    6.16
  -1  -6   2   88.11    6.15
  -1   6   2   92.61    6.59
   0  -6   2   63.15    4.21
   0  -6   2   61.61    4.17
   0  -6   2   63.68    4.46
   0  -6  -2   63.67    4.54
   0  -6  -2   62.23    4.23
   0   6   2   64.15    4.55
   1  -6   2   16.88    1.32
  -1  -6  -2   18.47    1.40
   1  -6   2   16.78    1.25
   1  -6   2   17.86    1.38
  -1  -6  -2   15.06    1.45
   1   6   2   16.76    1.50
   2  -6   2   89.25    5.76
   2  -6   2   89.06    6.10
  -2  -6  -2   86.83    6.29
  -2  -6  -2   92.69    5.87
   2  -6   2   89.77    5.77
   2   6   2   85.36    5.48
  -3  -6  -2    1.72    0.35
   3  -6   2    1.76    0.28
   3  -6   2    1.77    0.32
  -3  -6  -2    1.92    0.41
  -3  -6  -2    1.89    0.50
   3  -6   2    1.79    0.34
  -3   6  -2    1.42    0.46
   3   6   2    1.62    0.41
  -4  -6  -2  167.91   10.34
   4  -6   2  156.65   10.15
   4  -6   2  156.47    9.54
  -4  -6  -2  172.58   10.97
   4  -6   2  153.24   10.03
  -4  -6  -2  151.99   10.17
  -4   6  -2  152.39   10.74
   4   6   2  156.88    9.68
  -5  -6  -2    0.61    0.29
  -5  -6  -2    1.06    0.33
   5  -6   2    1.01    0.25
   5  -6   2    1.15    0.36
  -5  -6  -2    0.77    0.31
  -5  -6  -2    0.64    0.43
   5  -6   2    0.82    0.22
  -5   6  -2    1.10    0.53
   5   6   2    1.24    0.41
   6  -6   2    8.66    0.99
  -6  -6  -2    8.58    1.13
  -6  -6  -2    6.56    0.88
  -6  -6  -2    7.08    0.89
   6  -6   2    7.09    0.71
  -6  -6  -2    4.09    0.87
   6   6   2    8.51    1.09
  -7  -6  -2    0.19    0.39
   7  -6   2    0.13    0.25
  -7  -6  -2   -0.02    0.27
   7  -6   2    0.18    0.18
   7   6   2   -0.09    0.34
  -7   6  -2    0.01    0.36
   8  -6   2   34.58    2.65
  -8  -6  -2   34.84    3.03
   8  -6   2   34.44    2.64
  -8   6  -2   35.65    3.10
   8   6   2   38.86    2.85
   9  -6   2    0.12    0.37
  -9  -6  -2    0.90    0.67
   9  -6   2    0.45    0.30
  -9   6  -2   -0.14    0.53
   9   6   2    0.01    0.46
  10  -6   2    2.59    0.61
  10  -6   2    1.98    0.65
 -10   6  -2    2.44    0.78
  10   6   2    1.03    0.64
  11  -6   2   -0.07    0.44
  11   6   2   -0.29    0.59
 -11   6  -2   -0.50    0.53
  12  -6   2    1.86    0.77
 -12   6  -2    2.01    1.00
  12   6   2    2.34    0.96
 -12  -7   2    0.38    0.58
  12  -7  -2   -0.55    0.44
 -12   7   2    1.40    0.75
  12   7  -2    0.07    0.70
  11  -7  -2   13.20    1.68
 -11  -7   2   11.34    1.75
  11  -7  -2   10.26    1.02
  11   7  -2   11.57    1.68
 -11   7   2   11.75    1.86
  10  -7  -2    9.88    0.85
  10  -7  -2   10.59    1.36
 -10  -7   2    7.92    1.40
  10   7  -2   10.39    1.41
 -10   7   2    8.94    1.23
  -9  -7   2   -0.52    0.43
   9  -7  -2    2.23    0.63
  -9   7   2    1.87    0.67
  -9   7   2    0.94    0.44
   9   7  -2    0.78    0.49
  -8  -7   2   33.17    2.85
  -8  -7   2   30.15    2.51
   8  -7  -2   31.37    2.44
  -8   7   2   36.45    2.48
   8   7  -2   32.75    2.50
  -8   7   2   31.11    2.83
   7  -7  -2   19.64    1.51
  -7  -7   2   17.20    1.54
  -7   7   2   16.58    1.77
   7   7  -2   16.61    1.50
  -7   7   2   16.66    1.46
   6  -7  -2    2.65    0.52
  -6  -7   2    3.47    0.66
  -6  -7   2    3.44    0.75
  -6  -7   2    3.11    0.65
   6  -7  -2    2.43    0.48
   6  -7  -2    3.55    0.60
   6   7  -2    4.15    0.67
  -6   7   2    3.44    0.59
  -6   7   2    2.74    0.72
  -6   7   2    2.80    0.61
  -5  -7   2    1.96    0.49
   5  -7  -2    2.04    0.43
   5  -7  -2    2.75    0.52
   5  -7  -2    2.44    0.47
  -5  -7   2    2.30    0.51
   5   7  -2    1.94    0.42
  -5   7   2    1.83    0.56
  -5   7   2    2.44    0.46
  -5   7   2    2.54    0.57
  -4  -7   2  180.71   11.53
   4  -7  -2  183.51   12.14
   4  -7  -2  170.31   11.33
  -4  -7   2  184.90   11.44
  -4  -7   2  178.82   12.26
  -4   7   2  172.37   12.12
  -4   7   2  180.77   10.65
  -4   7   2  149.16   11.83
   4   7  -2  196.73   10.68
  -3  -7   2   23.25    2.21
   3  -7  -2   29.49    2.22
   3  -7  -2   25.68    2.05
  -3  -7   2   29.48    2.14
  -3  -7   2   27.61    2.07
  -3   7   2   27.48    1.87
  -3   7   2   32.69    2.25
  -2  -7   2   55.07    3.61
   2  -7  -2   48.52    3.58
  -2  -7   2   51.21    3.63
  -2  -7   2   50.69    3.87
   2  -7  -2   52.33    3.86
  -2   7   2   53.01    3.28
  -2   7   2   55.63    3.88
  -1  -7   2    0.12    0.14
   1  -7  -2   -0.01    0.19
   1  -7  -2    0.26    0.23
  -1  -7   2    0.13    0.22
  -1  -7   2    0.21    0.21
  -1   7   2    0.13    0.30
   0  -7  -2  156.16    9.99
   0  -7  -2  150.57   10.68
   0  -7   2  160.80   10.62
   0  -7   2  155.89    9.96
   0  -7   2  156.01   10.00
   0   7   2  150.77   10.68
  -1  -7  -2    7.96    0.95
   1  -7   2    8.11    0.81
   1  -7   2    8.99    0.83
  -1  -7  -2    8.76    1.07
   1  -7   2    7.73    0.71
   1   7   2    7.67    0.71
  -2  -7  -2  128.45    8.20
   2  -7   2  128.10    8.11
   2  -7   2  125.44    8.59
   2  -7   2  125.57    8.11
  -2  -7  -2  127.24    8.19
  -2  -7  -2  119.24    8.78
   3  -7   2    3.28    0.51
   3  -7   2    3.80    0.46
   3  -7   2    4.30    0.53
  -3  -7  -2    4.11    0.58
   3  -7   2    3.30    0.42
  -3  -7  -2    2.82    0.54
   3   7   2    3.95    0.60
  -3   7  -2    3.21    0.67
  -4  -7  -2   14.13    1.50
   4  -7   2   13.51    1.15
  -4  -7  -2   17.42    1.38
   4  -7   2   15.58    1.16
  -4  -7  -2   15.38    1.32
   4  -7   2   14.66    1.20
   4   7   2   15.20    1.32
  -4   7  -2   16.48    1.53
  -5  -7  -2   14.42    1.51
   5  -7   2   14.76    1.19
   5  -7   2   13.21    1.19
  -5  -7  -2   16.08    1.36
   5  -7   2   15.48    1.18
  -5  -7  -2   16.87    1.37
   5   7   2   14.64    1.35
  -5   7  -2   13.87    1.65
   6  -7   2  155.48    9.88
  -6  -7  -2  146.35   10.05
   6  -7   2  142.69    9.32
  -6  -7  -2  157.53    9.92
  -6  -7  -2  161.05   10.71
  -6   7  -2  144.74   10.54
   6   7   2  159.32    9.52
   7  -7   2    7.11    0.87
  -7  -7  -2    8.93    1.26
   7  -7   2    8.16    1.06
   7   7   2    8.33    1.17
   8  -7   2    6.47    1.04
   8  -7   2    8.19    0.97
  -8  -7  -2   10.48    1.50
  -8   7  -2    8.44    1.42
   8   7   2    7.03    1.13
   9  -7   2    0.61    0.43
   9  -7   2    0.50    0.33
  -9  -7  -2    0.00    0.55
  -9   7  -2    0.84    0.58
  10  -7   2   47.46    3.51
  10  -7   2   46.42    3.51
  10   7   2   42.04    3.59
 -10   7  -2   50.57    4.19
  11  -7   2    0.74    0.55
 -11   7  -2    0.06    0.56
  11   7   2   -0.17    0.61
 -12  -8   2   20.34    2.71
  12  -8  -2   31.18    2.48
 -12   8   2   27.71    2.81
  12   8  -2   18.56    2.45
  11  -8  -2    0.05    0.48
 -11  -8   2   -0.10    0.46
  11  -8  -2    0.38    0.31
 -11   8   2    1.43    0.74
  11   8  -2    0.27    0.59
 -10  -8   2    5.04    1.14
  10  -8  -2    4.40    0.87
 -10   8   2    3.49    0.98
  10   8  -2    4.12    0.95
 -10   8   2    3.43    0.79
  -9  -8   2    3.43    0.90
   9  -8  -2    2.64    0.66
  -9   8   2    2.69    0.89
   9   8  -2    2.83    0.74
  -9   8   2    1.46    0.55
   8  -8  -2   15.22    1.50
  -8  -8   2   24.12    2.05
  -8  -8   2   18.09    1.66
  -8   8   2   14.91    1.48
   8   8  -2   15.50    1.75
  -8   8   2   18.87    1.89
  -7  -8   2    5.34    0.99
  -7  -8   2    7.39    0.99
   7  -8  -2    5.48    0.83
  -7   8   2    4.57    0.98
  -7   8   2    5.37    0.81
   7   8  -2    4.73    0.80
  -6  -8   2   73.70    5.25
  -6  -8   2   72.25    5.20
  -6  -8   2   80.62    5.61
   6  -8  -2   78.03    5.50
   6  -8  -2   78.45    4.85
   6  -8  -2   73.87    5.07
  -6   8   2   70.01    5.41
  -6   8   2   80.30    4.87
   6   8  -2   70.17    4.85
  -6   8   2   79.03    5.52
  -5  -8   2    4.96    0.75
   5  -8  -2    6.14    0.74
   5  -8  -2    5.20    0.75
  -5  -8   2    5.00    0.77
   5  -8  -2    5.26    0.77
  -5  -8   2    4.57    0.89
  -5   8   2    5.00    0.85
   5   8  -2    5.77    0.74
  -5   8   2    4.13    0.63
  -5   8   2    5.69    0.85
  -4  -8   2    4.09    0.63
  -4  -8   2    2.62    0.61
   4  -8  -2    2.84    0.55
  -4  -8   2    5.44    0.81
   4  -8  -2    2.08    0.50
  -4   8   2    3.24    0.48
  -4   8   2    2.97    0.65
  -4   8   2    3.78    0.70
   3  -8  -2   49.10    3.75
  -3  -8   2   50.89    3.55
   3  -8  -2   49.81    3.53
  -3  -8   2   47.59    3.82
  -3  -8   2   47.69    3.57
  -3   8   2   52.92    3.22
  -3   8   2   55.72    3.83
   2  -8  -2  106.45    7.28
  -2  -8   2  113.27    7.32
  -2  -8   2  109.57    7.82
   2  -8  -2  110.16    7.79
  -2  -8   2  117.17    7.35
  -2   8   2  107.37    7.80
  -2   8   2  113.43    6.71
  -1  -8   2    2.69    0.41
   1  -8  -2    2.26    0.50
  -1  -8   2    1.74    0.43
   1  -8  -2    1.62    0.41
  -1  -8   2    2.01    0.45
  -1   8   2    2.03    0.33
   0  -8   2    1.96    0.46
   0  -8  -2    1.89    0.47
   0  -8   2    2.13    0.46
   0  -8   2    2.30    0.38
   0  -8  -2    1.52    0.42
   0   8   2    1.61    0.32
   0   8   2    1.41    0.52
   1  -8   2   58.12    4.12
   1  -8   2   62.60    4.37
  -1  -8  -2   55.43    4.16
  -1  -8  -2   62.04    4.51
   1  -8   2   60.18    4.06
   1   8   2   65.36    3.82
   2  -8   2   59.64    4.00
   2  -8   2   58.34    3.72
  -2  -8  -2   49.72    4.14
  -2  -8  -2   55.05    3.86
  -2  -8  -2   55.03    3.79
   2  -8   2   54.61    3.78
   2   8   2   54.86    3.55
  -2   8  -2   54.76    3.98
   3  -8   2   19.93    1.52
   3  -8   2   19.52    1.54
   3  -8   2   18.12    1.40
  -3  -8  -2   19.45    1.56
  -3  -8  -2   18.16    1.59
  -3   8  -2   19.68    1.71
   3   8   2   19.69    1.50
  -4  -8  -2  122.16    8.24
  -4  -8  -2  124.91    8.84
   4  -8   2  121.60    8.05
  -4  -8  -2  121.28    8.19
   4  -8   2  121.87    8.03
   4   8   2  129.33    7.76
  -4   8  -2  132.11    8.65
   5  -8   2   59.60    4.10
  -5  -8  -2   59.27    4.65
  -5  -8  -2   65.26    4.35
  -5  -8  -2   57.77    4.26
  -5   8  -2   64.88    4.64
   5   8   2   62.43    4.14
   6  -8   2    7.21    0.72
  -6  -8  -2    5.14    0.85
  -6  -8  -2   10.19    1.32
  -6  -8  -2    7.44    1.02
   6   8   2    8.24    1.10
  -6   8  -2    7.25    1.15
  -7  -8  -2   38.65    2.65
   7  -8   2   28.67    2.17
  -7  -8  -2   24.58    2.31
  -7   8  -2   28.65    2.63
   7   8   2   27.08    2.33
   8  -8   2   45.41    3.29
  -8  -8  -2   51.50    3.75
  -8   8  -2   39.36    3.73
   8   8   2   45.39    3.42
  -9  -8  -2    7.65    1.27
   9  -8   2    6.75    0.93
  -9   8  -2    4.90    1.22
   9   8   2    3.74    0.98
 -10  -8  -2   12.74    1.78
  10   8   2    9.52    1.57
 -10   8  -2    9.61    1.73
  11   8   2   16.30    2.18
 -11   8  -2   21.06    2.69
 -11  -9   2   49.81    4.44
 -11   9   2   53.31    4.52
 -10  -9   2   10.10    1.71
 -10   9   2   13.43    1.94
  -9  -9   2    0.34    0.48
  -9   9   2    1.47    0.66
  -8  -9   2    2.78    0.71
  -8  -9   2    3.89    0.87
  -8   9   2    3.88    0.98
  -7  -9   2   99.59    7.43
  -7  -9   2  100.35    6.85
  -7   9   2  101.45    7.25
  -6  -9   2   11.13    1.37
   6  -9  -2   11.58    1.13
  -6   9   2    9.12    1.33
  -5  -9   2    1.72    0.46
  -5  -9   2    0.47    0.31
   5  -9  -2    1.09    0.39
  -5  -9   2    0.86    0.42
   5  -9  -2    1.14    0.41
  -5   9   2    1.31    0.52
  -5   9   2    1.37    0.57
  -4  -9   2   41.75    3.10
   4  -9  -2   43.35    3.10
   4  -9  -2   42.03    3.25
  -4  -9   2   40.49    3.37
  -4   9   2   45.46    3.35
   3  -9  -2   43.71    3.39
   3  -9  -2   48.30    3.62
  -3  -9   2   51.52    3.50
  -3  -9   2   46.56    3.40
  -3  -9   2   47.40    3.71
  -3   9   2   50.51    3.69
  -2  -9   2    5.35    0.70
   2  -9  -2    5.70    0.84
   2  -9  -2    5.12    0.81
  -2  -9   2    6.67    0.97
  -2  -9   2    5.61    0.87
   1  -9  -2   66.08    5.00
  -1  -9   2   67.23    4.99
   1  -9  -2   72.75    4.74
  -1  -9   2   68.71    4.63
  -1  -9   2   64.40    4.67
  -1   9   2   71.93    5.02
   0  -9  -2   20.43    1.81
   0  -9   2   21.96    1.76
   0  -9  -2   20.02    1.70
   0  -9   2   18.09    1.63
   0  -9   2   20.19    1.55
  -1  -9  -2   25.97    2.20
  -1  -9  -2   28.18    2.42
   1  -9   2   29.95    2.20
  -1  -9  -2   27.14    2.07
   1  -9   2   29.09    2.28
   1  -9   2   31.50    2.09
  -2  -9  -2   25.65    2.19
  -2  -9  -2   25.10    1.89
   2  -9   2   25.50    1.94
   2  -9   2   24.06    1.80
  -2  -9  -2   26.18    2.03
   2  -9   2   23.46    1.97
  -3  -9  -2   75.07    4.73
   3  -9   2   66.41    4.60
   3  -9   2   66.31    4.52
  -3  -9  -2   63.27    5.07
  -3  -9  -2   68.07    4.74
  -3   9  -2   65.96    4.89
   3   9   2   72.11    4.40
  -4  -9  -2    0.56    0.31
   4  -9   2    0.52    0.24
  -4  -9  -2    0.37    0.30
  -4  -9  -2   -0.10    0.20
   4  -9   2    0.47    0.18
   4   9   2    0.84    0.36
  -4   9  -2    0.71    0.52
   5  -9   2    8.92    0.84
  -5  -9  -2   10.37    1.24
  -5  -9  -2   10.34    1.19
  -5   9  -2   11.03    1.42
   5   9   2    7.80    1.09
  -6  -9  -2   49.74    3.49
  -6  -9  -2   40.84    3.40
   6  -9   2   52.75    3.27
  -6  -9  -2   39.98    3.74
  -6   9  -2   51.66    3.79
   6   9   2   42.07    3.30
  -7  -9  -2    4.57    0.87
   7  -9   2    5.44    0.71
  -7  -9  -2    6.91    1.20
   7   9   2    3.73    0.84
  -7   9  -2    4.62    1.05
   8  -9   2    0.10    0.28
  -8  -9  -2    0.59    0.51
  -8   9  -2   -0.13    0.64
   8   9   2    0.05    0.45
  -9  -9  -2   14.00    1.93
   9  -9   2    9.11    1.24
   9   9   2   12.84    1.70
  -9   9  -2   14.08    1.97
 -10  -9  -2    4.02    1.12
 -10   9  -2    7.21    1.53
  10   9   2    9.00    1.48
 -11   9  -2    1.90    1.03
  11   9   2    2.01    0.97
 -11 -10   2    5.97    1.27
 -11  10   2    6.15    1.40
 -10 -10   2   -0.68    0.45
 -10  10   2   -0.05    0.60
  -9 -10   2   18.50    2.43
  -9  10   2   22.06    2.26
  -8 -10   2    3.09    0.75
  -8 -10   2    2.77    0.88
  -8  10   2    2.24    0.92
  -7 -10   2    8.95    1.40
  -7 -10   2   11.05    1.41
  -7  10   2    6.29    1.23
  -6 -10   2    3.21    0.80
  -6 -10   2    2.38    0.65
   6 -10  -2    1.48    0.49
  -5 -10   2   36.03    3.24
  -5 -10   2   40.36    3.02
   5 -10  -2   43.16    2.97
  -5 -10   2   41.14    2.99
   5 -10  -2   41.11    3.09
  -5  10   2   32.63    3.09
  -4 -10   2    0.94    0.41
   4 -10  -2    0.36    0.29
   4 -10  -2    1.23    0.41
  -4 -10   2    0.43    0.37
  -4 -10   2    0.83    0.37
  -4  10   2    1.58    0.56
  -3 -10   2   91.46    6.78
  -3 -10   2  100.91    6.41
   3 -10  -2   89.68    6.29
   3 -10  -2   92.80    6.70
  -3 -10   2   95.35    6.33
  -3  10   2   91.53    6.74
  -2 -10   2    4.81    0.82
  -2 -10   2    4.92    0.87
  -2 -10   2    3.87    0.65
   2 -10  -2    5.52    0.86
   2 -10  -2    4.62    0.81
  -2  10   2    6.88    0.89
  -1 -10   2    6.54    0.82
   1 -10  -2    6.75    0.97
   1 -10  -2    6.24    0.98
  -1 -10   2    6.97    0.98
  -1 -10   2    6.44    0.94
   0 -10   2    2.27    0.53
   0 -10  -2    0.81    0.37
   0 -10   2    1.19    0.39
   0 -10  -2    0.74    0.33
   0 -10   2    1.89    0.39
   1 -10   2  136.10    8.97
  -1 -10  -2  146.66    9.76
  -1 -10  -2  133.35    8.98
   1 -10   2  139.94    9.02
   1 -10   2  134.88    9.56
  -1 -10  -2  136.98    9.06
  -2 -10  -2    4.81    0.82
  -2 -10  -2    5.94    1.00
   2 -10   2    6.66    0.87
  -2 -10  -2    5.87    0.76
   2 -10   2    5.94    0.69
   2 -10   2    6.25    0.84
   3 -10   2   30.40    2.37
   3 -10   2   32.63    2.26
  -3 -10  -2   31.09    2.40
  -3 -10  -2   32.20    2.51
  -3 -10  -2   30.68    2.69
  -4 -10  -2    1.90    0.46
  -4 -10  -2    1.60    0.48
   4 -10   2    2.04    0.36
   4 -10   2    1.35    0.41
  -5 -10  -2   86.87    5.74
  -5 -10  -2   82.53    6.18
   5 -10   2   83.84    5.47
  -5 -10  -2   86.39    5.72
  -5  10  -2   70.95    5.90
  -6 -10  -2    0.13    0.37
  -6 -10  -2   -0.03    0.39
   6 -10   2    0.28    0.20
  -6 -10  -2   -0.34    0.25
  -6  10  -2   -1.11    0.54
  -7 -10  -2   77.90    5.80
   7 -10   2   73.85    5.04
  -7 -10  -2   68.00    5.21
  -7  10  -2   77.48    5.71
  -8 -10  -2    0.31    0.40
   8 -10   2   -0.11    0.25
  -8  10  -2    0.53    0.67
  -9 -10  -2    5.54    1.27
  -9  10  -2    8.19    1.53
 -10 -10  -2    0.55    0.57
 -10  10  -2   -0.53    0.69
 -10 -11   2    2.98    0.98
 -10  11   2    3.72    1.14
  -9 -11   2    2.96    0.93
  -8 -11   2    5.27    1.14
  -7 -11   2  101.95    7.67
  -6 -11   2    1.41    0.61
  -6 -11   2    1.91    0.66
  -5 -11   2   16.30    1.72
  -5 -11   2   18.40    1.96
   5 -11  -2   19.74    1.72
  -5 -11   2   21.08    1.75
  -5  11   2   17.92    1.91
  -4 -11   2    2.21    0.63
   4 -11  -2    3.39    0.70
   4 -11  -2    3.23    0.67
  -4 -11   2    4.19    0.71
  -4 -11   2    2.13    0.64
  -3 -11   2  101.52    6.69
  -3 -11   2  105.55    6.66
   3 -11  -2   87.52    6.97
   3 -11  -2   94.71    6.59
  -3 -11   2   94.98    7.11
  -3  11   2  102.45    7.13
  -2 -11   2    2.74    0.68
   2 -11  -2    5.79    0.87
  -2 -11   2    4.09    0.67
  -2 -11   2    4.24    0.81
   2 -11  -2    5.03    0.82
   1 -11  -2   45.85    3.50
  -1 -11   2   52.61    3.80
   1 -11  -2   46.12    3.75
  -1 -11   2   48.30    3.43
  -1 -11   2   47.98    3.55
   0 -11  -2    6.19    0.70
   0 -11  -2    5.61    0.95
   0 -11   2    6.11    0.77
   0 -11  -2    5.48    0.88
   0 -11   2    4.21    0.78
   0 -11   2    5.59    0.90
  -1 -11  -2   14.06    1.42
   1 -11   2   14.73    1.25
  -1 -11  -2   13.83    1.24
   1 -11   2   16.19    1.42
   1 -11   2   14.95    1.43
  -1 -11  -2   13.33    1.69
   2 -11   2   18.67    1.43
  -2 -11  -2   18.05    1.78
  -2 -11  -2   15.99    1.61
   2 -11   2   19.25    1.63
  -2 -11  -2   16.91    1.49
   2 -11   2   15.80    1.53
  -3 -11  -2   45.64    3.67
  -3 -11  -2   40.79    3.22
   3 -11   2   43.85    3.11
   3 -11   2   46.59    3.27
  -3 -11  -2   47.95    3.42
   4 -11   2    0.24    0.28
  -4 -11  -2    0.12    0.31
  -4 -11  -2    0.17    0.27
   4 -11   2    0.23    0.18
  -4 -11  -2    0.16    0.38
  -5 -11  -2   13.55    1.64
   5 -11   2   13.90    1.20
  -5 -11  -2   13.86    1.82
  -5 -11  -2   14.53    1.44
  -6 -11  -2   14.57    1.59
   6 -11   2   18.04    1.43
  -6 -11  -2   17.90    2.17
  -6 -11  -2   17.39    1.91
   7 -11   2    7.09    0.84
  -7 -11  -2    3.94    1.00
   8 -11   2    2.11    0.53
  -8 -11  -2    1.13    0.58
  -8  11  -2    0.23    0.67
  -9 -11  -2   16.44    2.14
  -9  11  -2   12.35    2.02
 -10 -12   2    2.88    1.07
  -9 -12   2   15.93    2.22
  -8 -12   2   22.62    2.72
  -7 -12   2    0.49    0.51
  -6 -12   2   35.06    3.18
  -5 -12   2   21.22    2.13
   5 -12  -2   19.51    1.79
  -5 -12   2   18.98    1.80
  -4 -12   2    1.10    0.54
  -4 -12   2    1.40    0.62
  -4 -12   2    0.48    0.33
   4 -12  -2    1.63    0.51
   4 -12  -2    1.07    0.44
  -3 -12   2   41.70    3.14
  -3 -12   2   46.27    3.51
  -3 -12   2   35.06    3.15
   3 -12  -2   42.17    3.36
   3 -12  -2   44.47    3.22
   2 -12  -2   36.29    2.98
  -2 -12   2   35.41    2.71
  -2 -12   2   35.70    3.01
  -2 -12   2   36.34    2.86
   2 -12  -2   35.54    2.49
   2 -12  -2   34.88    2.79
  -1 -12   2   -0.06    0.28
  -1 -12   2    0.21    0.37
   1 -12  -2    0.05    0.14
  -1 -12   2    0.08    0.21
   1 -12  -2   -0.04    0.28
   1 -12  -2    0.31    0.37
   0 -12   2    8.37    1.17
   0 -12  -2    8.09    1.14
   0 -12   2    8.39    1.02
   0 -12   2    8.52    1.22
   0 -12  -2   10.78    0.92
   0 -12  -2    6.76    1.14
  -1 -12  -2   57.83    4.26
   1 -12   2   63.25    4.41
   1 -12   2   62.64    4.27
  -1 -12  -2   60.79    4.46
  -1 -12  -2   62.35    4.77
   1 -12   2   63.03    4.63
  -2 -12  -2    9.07    1.39
  -2 -12  -2   17.36    1.37
   2 -12   2   15.03    1.46
  -2 -12  -2   12.74    1.71
   2 -12   2   15.88    1.45
   2 -12   2   14.50    1.26
   3 -12   2   16.51    1.40
  -3 -12  -2   19.29    1.60
   3 -12   2   16.48    1.57
  -3 -12  -2   17.19    1.65
  -3 -12  -2   15.46    1.97
  -4 -12  -2   26.19    2.20
   4 -12   2   25.51    2.01
  -4 -12  -2   29.81    2.61
  -5 -12  -2   31.29    2.64
  -5 -12  -2   33.86    3.02
   5 -12   2   33.18    2.43
   6 -12   2    0.42    0.30
  -6 -12  -2    1.52    0.69
  -7 -12  -2   31.82    3.04
   7 -12   2   32.00    2.45
  -8 -12  -2    7.43    1.42
  -9 -12  -2   10.23    1.76
  -9 -13   2    3.60    1.06
  -8 -13   2   16.06    2.26
  -7 -13   2   10.04    1.66
  -6 -13   2    2.16    0.75
   5 -13  -2    0.05    0.41
  -5 -13   2    0.15    0.39
  -5 -13   2    0.47    0.35
  -4 -13   2   74.38    5.71
  -4 -13   2   78.87    5.29
   4 -13  -2   70.55    4.83
   4 -13  -2   74.26    5.25
   4 -13  -2   72.87    5.53
  -3 -13   2   25.79    2.11
   3 -13  -2   23.60    2.26
   3 -13  -2   24.45    2.18
   3 -13  -2   24.51    1.81
  -3 -13   2   25.70    2.38
   2 -13  -2   13.05    1.09
   2 -13  -2   12.34    1.56
  -2 -13   2   13.20    1.72
  -2 -13   2   11.89    1.25
   2 -13  -2   12.26    1.65
   1 -13  -2    0.11    0.32
  -1 -13   2   -0.08    0.23
  -1 -13   2    0.61    0.42
   1 -13  -2    0.28    0.22
   0 -13  -2   56.79    3.86
   0 -13   2   58.70    4.31
   0 -13   2   44.86    3.96
   0 -13  -2   55.85    4.35
   0 -13   2   56.88    3.92
  -1 -13  -2    1.18    0.36
  -1 -13  -2    0.80    0.47
   1 -13   2    1.75    0.45
   1 -13   2    1.42    0.54
   1 -13   2    0.87    0.50
  -2 -13  -2   65.23    4.59
   2 -13   2   59.01    4.60
  -2 -13  -2   71.43    5.17
   2 -13   2   65.25    4.51
  -3 -13  -2    2.81    0.79
   3 -13   2    2.93    0.55
  -3 -13  -2    3.06    0.64
   3 -13   2    3.62    0.75
  -4 -13  -2    6.57    1.29
   4 -13   2    6.42    0.84
  -4 -13  -2    7.67    1.07
  -5 -13  -2    0.26    0.48
  -5 -13  -2    0.09    0.36
   5 -13   2    0.57    0.30
   6 -13   2   42.44    3.07
  -6 -13  -2   39.25    3.67
  -7 -13  -2   -0.23    0.43
  -8 -13  -2    3.31    0.99
  -8 -14   2   21.14    2.72
  -7 -14   2   -0.25    0.49
  -6 -14   2   47.49    4.11
  -5 -14   2    6.59    1.29
  -5 -14   2    7.71    1.17
   5 -14  -2    5.78    0.67
  -4 -14   2    3.30    0.74
  -4 -14   2    2.89    0.82
   4 -14  -2    2.11    0.41
   3 -14  -2    0.15    0.37
   3 -14  -2   -0.11    0.20
  -3 -14   2    0.02    0.33
  -3 -14   2    0.05    0.38
  -2 -14   2   77.33    5.70
   2 -14  -2   71.92    5.00
   2 -14  -2   71.92    5.62
  -2 -14   2   74.79    5.24
   1 -14  -2    1.44    0.53
  -1 -14   2    0.57    0.35
  -1 -14   2    0.71    0.56
   1 -14  -2    1.02    0.31
   0 -14  -2    6.43    1.21
   0 -14  -2    7.73    0.94
   0 -14   2    6.37    0.96
   0 -14   2    7.29    1.18
   1 -14   2    0.02    0.27
  -1 -14  -2    0.13    0.27
  -1 -14  -2   -0.15    0.38
   1 -14   2    0.05    0.35
   2 -14   2   37.17    2.58
  -2 -14  -2   29.53    2.56
  -2 -14  -2   32.25    2.98
  -3 -14  -2    0.05    0.40
  -3 -14  -2    0.43    0.37
   3 -14   2    1.19    0.41
  -4 -14  -2   30.85    3.02
  -4 -14  -2   33.67    2.71
   4 -14   2   34.10    2.55
  -5 -14  -2    0.30    0.50
  -5 -14  -2    0.19    0.43
  -6 -14  -2    0.13    0.54
  -7 -14  -2    4.24    1.17
  -6 -15   2    0.24    0.54
  -5 -15   2    2.63    0.93
   4 -15  -2   23.94    1.87
  -4 -15   2   24.00    2.49
  -4 -15   2   24.57    2.19
   3 -15  -2    1.48    0.59
  -3 -15   2    1.33    0.53
  -3 -15   2    0.49    0.52
   3 -15  -2    1.43    0.39
   2 -15  -2    8.71    1.30
  -2 -15   2    8.58    1.43
  -2 -15   2    7.37    1.10
   2 -15  -2    6.77    0.91
  -1 -15   2   14.57    1.81
   1 -15  -2   12.79    1.27
   1 -15  -2   14.82    1.84
  -1 -15   2   12.11    1.46
   0 -15   2   14.94    1.90
   0 -15  -2   13.17    1.87
   0 -15  -2   15.15    1.45
   0 -15   2   17.58    1.55
  -1 -15  -2    0.81    0.55
  -1 -15  -2    1.97    0.55
  -2 -15  -2   50.41    4.26
  -3 -15  -2   27.93    2.77
  -4 -15  -2    2.57    0.85
  -5 -15  -2    3.95    1.05
  -6 -15  -2   67.74    5.65
  -5 -16   2   35.69    3.37
  -4 -16   2    3.27    0.98
  -3 -16   2    6.47    1.32
  -2 -16   2    8.37    1.41
   2 -16  -2    7.71    1.37
   1 -16  -2   10.38    1.58
  -1 -16   2   10.60    1.61
   0 -16  -2   -0.14    0.45
   0 -16   2    0.18    0.41
  -1 -16  -2   16.79    2.16
  -2 -16  -2    8.84    1.56
  -3 -16  -2    0.11    0.35
  -4 -16  -2    3.94    1.07
  -2 -17   2    2.40    0.85
   2 -17  -2    2.22    0.85
   1 -17  -2   22.25    2.29
  -1 -17   2   20.05    2.45
   0 -17  -2    0.25    0.46
  -1 -17  -2    1.15    0.73
  13   0  -3   22.90    2.56
  12   0  -3    0.02    0.46
 -12   0   3   -0.02    0.37
 -11   0   3    0.14    0.35
 -11   0   3    0.83    0.51
  11   0  -3    0.16    0.45
 -10   0   3   -0.12    0.28
 -10   0   3    0.14    0.34
 -10   0   3   -0.05    0.51
  10   0  -3   -0.22    0.32
  -9   0   3    1.19    0.52
   9   0  -3    0.58    0.40
  -9   0   3    1.11    0.41
  -8   0   3   -0.23    0.17
  -8   0   3    0.16    0.24
   8   0  -3    0.31    0.24
  -8   0   3    0.04    0.27
  -7   0   3   32.79    2.62
   7   0  -3   33.44    2.39
  -7   0   3   32.63    2.30
  -7   0   3   32.27    2.35
  -7   0   3   32.50    2.62
  -6   0   3   -0.07    0.16
   6   0  -3   -0.10    0.09
  -6   0   3    0.01    0.17
   6   0  -3   -0.30    0.17
   5   0  -3    4.73    0.44
  -5   0   3    4.77    0.59
  -5   0   3    4.65    0.63
  -4   0   3   -0.13    0.12
   4   0  -3    0.03    0.07
  -4   0   3    0.09    0.24
  -4   0   3    0.27    0.13
   3   0  -3   91.81    5.66
  -3   0   3   87.39    5.68
  -3   0   3   79.32    6.08
  -3   0   3   94.37    5.39
   3   0  -3   87.70    5.66
  -2   0   3   -0.37    0.13
   2   0  -3   -0.16    0.09
   2   0  -3   -0.17    0.14
   0   0   3   -0.27    0.16
   0   0  -3   -0.35    0.18
   0   0   3   -0.26    0.14
   1   0   3    6.64    0.57
   1   0   3    7.83    0.71
   1   0   3    7.90    0.66
  -1   0  -3    6.35    0.62
   2   0   3   -0.03    0.16
  -2   0  -3    0.00    0.17
  -3   0  -3  191.69   13.49
  -3   0  -3  246.41   14.52
   3   0   3  217.80   13.90
  -4   0  -3   -0.05    0.18
  -4   0  -3    0.23    0.25
   4   0   3    0.20    0.18
  -4   0  -3   -0.01    0.17
  -4   0  -3    0.24    0.15
   5   0   3    1.67    0.42
  -5   0  -3    1.90    0.51
   5   0   3    3.02    0.54
  -5   0  -3    2.10    0.43
  -6   0  -3   -0.22    0.21
   6   0   3    0.35    0.24
   6   0   3    0.09    0.21
   7   0   3  129.10    8.45
  -7   0  -3  140.76    9.44
   8   0   3   -0.12    0.25
  -8   0  -3   -0.02    0.27
   9   0   3   35.29    2.83
  -9   0  -3   36.75    3.13
  10   0   3    0.31    0.33
 -10   0  -3   -0.27    0.42
 -11   0  -3    8.24    1.48
  11   0   3    5.11    1.07
  12   0   3   -0.15    0.47
 -12   0  -3    0.02    0.68
  13  -1  -3    1.37    0.78
  13   1  -3    1.01    0.71
  12  -1  -3    6.78    1.26
  12   1  -3    7.57    1.34
 -12   1   3    8.78    1.32
 -12   1   3   11.03    1.74
  11  -1  -3   32.21    2.70
 -11  -1   3   30.36    2.51
 -11   1   3   35.61    3.01
 -11   1   3   31.15    2.56
  11   1  -3   30.44    2.66
 -10  -1   3    0.65    0.40
 -10  -1   3    1.17    0.54
  10  -1  -3    1.03    0.51
 -10  -1   3    0.20    0.55
  10   1  -3    0.87    0.45
 -10   1   3    1.66    0.62
 -10   1   3    1.89    0.54
  -9  -1   3   76.24    4.95
  -9  -1   3   80.95    5.58
   9  -1  -3   69.84    4.97
  -9  -1   3   74.25    5.52
  -9   1   3   65.91    5.43
  -9   1   3   81.19    4.99
   9   1  -3   75.13    5.00
  -9   1   3   74.36    5.55
  -8  -1   3   16.81    1.69
  -8  -1   3   17.71    1.49
  -8  -1   3   18.79    1.70
   8  -1  -3   18.54    1.56
  -8  -1   3   14.91    1.37
  -8   1   3   18.42    1.72
  -8   1   3   17.70    1.52
  -8   1   3   19.75    1.69
   8   1  -3   16.01    1.50
  -7  -1   3    0.90    0.34
  -7  -1   3    1.20    0.31
   7  -1  -3    1.43    0.43
  -7   1   3    1.19    0.46
  -7   1   3    0.86    0.40
   7   1  -3    1.34    0.40
  -7   1   3    1.32    0.31
  -7   1   3    0.29    0.27
  -6  -1   3    4.60    0.65
   6  -1  -3    4.32    0.40
  -6  -1   3    3.20    0.65
   6  -1  -3    3.28    0.59
  -6  -1   3    4.44    0.57
   6  -1  -3    3.93    0.37
  -6   1   3    3.81    0.52
  -6   1   3    5.99    0.68
   6   1  -3    4.19    0.67
  -6   1   3    3.37    0.57
  -6   1   3    3.89    0.66
   6   1  -3    4.40    0.51
  -5  -1   3  160.01    9.54
  -5  -1   3  143.47   10.23
  -5  -1   3  145.81    9.05
  -5   1   3  143.41    9.06
   5   1  -3  146.79    9.60
   5   1  -3  162.71    9.11
  -5   1   3  146.23   10.23
  -5   1   3  148.59    9.50
  -4  -1   3    5.19    0.58
  -4  -1   3    3.76    0.61
  -4  -1   3    5.27    0.61
  -4   1   3    4.24    0.56
  -4   1   3    5.03    0.66
  -4   1   3    4.17    0.52
   4   1  -3    5.41    0.47
  -3  -1   3    8.95    0.57
  -3  -1   3    7.14    0.57
  -3  -1   3    5.08    0.69
  -3  -1   3    6.07    0.58
   3  -1  -3    6.64    0.61
  -3   1   3    7.37    0.71
   3   1  -3    6.64    0.62
  -3   1   3    6.68    0.58
  -3   1   3    4.17    0.58
   3   1  -3    6.15    0.56
   2  -1  -3    5.01    0.52
  -2  -1   3    3.06    0.48
  -2  -1   3    3.69    0.43
  -2  -1   3    4.35    0.49
  -2   1   3    4.84    0.51
   2   1  -3    5.52    0.56
  -2   1   3    3.94    0.47
   2   1  -3    4.61    0.43
  -1  -1   3  191.88   12.22
   1  -1  -3  200.07   12.05
   1   1  -3  183.25   12.05
   0  -1  -3   44.18    2.80
   0  -1   3   42.37    2.84
   0  -1   3   42.76    2.79
   0  -1  -3   44.03    2.83
   0   1  -3   39.10    2.79
   1  -1   3   57.37    3.85
   1  -1   3   56.75    3.72
   1   1   3   55.71    3.62
  -1   1  -3   61.74    3.75
   2  -1   3    2.47    0.28
   2  -1   3    2.53    0.38
   2  -1   3    2.57    0.42
  -2  -1  -3    2.50    0.34
  -2   1  -3    2.84    0.35
   2   1   3    2.01    0.39
   3  -1   3   53.52    3.58
   3  -1   3   48.38    3.35
  -3  -1  -3   52.88    3.40
   3   1   3   55.91    3.42
  -3   1  -3   44.24    3.73
  -3   1  -3   56.64    3.36
  -4  -1  -3   17.48    1.41
   4  -1   3   19.94    1.46
  -4  -1  -3   17.40    1.56
   4  -1   3   15.88    1.41
  -4  -1  -3   17.46    1.28
  -4   1  -3   18.53    1.20
  -4   1  -3   17.73    1.60
  -4   1  -3   19.45    1.21
   4   1   3   19.21    1.47
  -4   1  -3   19.16    1.38
  -5  -1  -3  117.67    7.86
   5  -1   3  113.49    7.52
  -5  -1  -3  111.66    7.15
   5  -1   3  125.74    7.11
  -5  -1  -3  115.39    7.43
   5   1   3  112.72    7.10
  -5   1  -3  101.38    7.32
  -5   1  -3  114.76    7.89
  -6  -1  -3   11.31    1.33
   6  -1   3   11.48    1.22
  -6  -1  -3   10.86    1.04
   6  -1   3    9.09    1.08
  -6   1  -3    8.59    1.23
   6   1   3   10.60    1.22
   7  -1   3    0.50    0.30
  -7  -1  -3    0.43    0.37
   7  -1   3    0.15    0.27
   7   1   3    0.49    0.31
  -7   1  -3    0.36    0.38
   8  -1   3   14.22    1.44
  -8  -1  -3   13.49    1.73
   8  -1   3   15.37    1.66
  -8   1  -3   16.14    1.67
   8   1   3   17.20    1.54
   9  -1   3   10.87    1.40
  -9  -1  -3   10.66    1.52
   9   1   3   11.26    1.46
  -9   1  -3   11.60    1.64
  10  -1   3   -0.13    0.32
 -10  -1  -3    0.05    0.38
 -10   1  -3   -0.04    0.44
  10   1   3   -0.04    0.44
 -11  -1  -3    3.88    1.03
  11  -1   3    4.18    0.92
 -11   1  -3    1.94    0.83
  11   1   3    2.47    0.79
 -12  -1  -3    4.51    1.23
  12  -1   3    4.41    1.06
  12   1   3    5.07    1.16
 -12   1  -3    5.87    1.40
  13  -2  -3   13.08    1.83
 -13   2   3   13.20    2.02
  13   2  -3   10.24    1.70
  12  -2  -3    3.21    0.90
 -12   2   3    2.47    0.80
  12   2  -3    2.98    0.88
 -12   2   3    3.77    1.08
 -11  -2   3    0.74    0.45
  11  -2  -3    1.31    0.56
 -11   2   3    1.08    0.50
  11   2  -3   -0.17    0.45
 -11   2   3    1.12    0.65
  10  -2  -3   44.11    3.45
 -10  -2   3   49.27    3.43
 -10   2   3   47.74    3.90
 -10   2   3   45.29    3.40
  10   2  -3   51.72    3.57
   9  -2  -3    7.03    1.06
  -9  -2   3    6.82    1.10
  -9  -2   3    5.01    0.84
  -9   2   3    4.77    0.83
  -9   2   3    6.78    1.02
  -9   2   3    5.65    1.06
   9   2  -3    5.87    0.95
   8  -2  -3   31.29    2.15
  -8  -2   3   24.76    2.18
  -8  -2   3   29.37    2.26
   8  -2  -3   32.93    2.36
  -8  -2   3   35.59    2.58
  -8   2   3   30.64    2.30
  -8   2   3   31.00    2.55
  -8   2   3   32.12    2.52
   8   2  -3   29.84    2.33
  -7  -2   3    0.35    0.28
   7  -2  -3    0.29    0.11
  -7  -2   3    0.64    0.27
   7  -2  -3    0.11    0.23
   7  -2  -3    0.65    0.15
  -7   2   3    0.38    0.38
  -7   2   3    0.26    0.40
  -7   2   3    0.41    0.29
   7   2  -3    0.29    0.25
  -6  -2   3   87.31    6.03
  -6  -2   3   87.30    5.54
   6  -2  -3   77.97    5.33
  -6  -2   3   81.19    5.30
  -6   2   3   81.06    5.94
  -6   2   3   86.76    5.97
   6   2  -3   89.30    5.38
  -6   2   3   84.20    5.33
  -5  -2   3    2.02    0.40
  -5  -2   3    3.54    0.50
  -5  -2   3    1.83    0.58
  -5  -2   3    2.15    0.38
   5   2  -3    2.26    0.44
  -5   2   3    3.02    0.54
  -5   2   3    2.28    0.44
  -4  -2   3   16.18    1.09
  -4  -2   3   12.02    0.96
  -4  -2   3   11.70    0.95
  -4  -2   3   11.55    0.99
  -4   2   3   11.15    1.06
  -4   2   3   10.20    0.95
  -3  -2   3   24.27    1.61
  -3  -2   3   21.64    1.76
  -3  -2   3   26.35    1.62
  -3  -2   3   24.55    1.53
   3  -2  -3   21.14    1.63
  -3   2   3   17.52    1.50
  -3   2   3   21.09    1.72
  -2  -2   3   80.86    5.53
   2  -2  -3   93.49    5.54
  -2  -2   3   98.99    5.96
  -2  -2   3   82.99    5.59
  -2   2   3   84.07    5.23
   2   2  -3   93.60    5.57
  -2   2   3   70.66    5.89
  -1  -2   3  101.68    6.21
  -1  -2   3   97.30    6.11
  -1   2   3   96.86    6.57
   1   2  -3   86.55    6.11
   0  -2  -3   63.27    4.30
   0  -2   3   62.06    4.36
   0  -2   3   69.45    4.29
   0   2  -3   70.47    4.31
   1  -2   3  122.68    8.64
   1  -2   3  153.05    8.49
  -1  -2  -3  124.98    8.51
  -1   2  -3  135.95    8.49
   1   2   3  134.50    8.10
  -2  -2  -3    1.29    0.26
   2  -2   3    1.67    0.34
  -2  -2  -3    1.64    0.37
   2  -2   3    1.72    0.30
   2  -2   3    1.51    0.22
   2   2   3    1.36    0.30
  -2   2  -3    1.47    0.30
   2   2   3    1.20    0.32
   3  -2   3  117.55    7.60
   3  -2   3  126.75    7.89
  -3  -2  -3  125.76    8.28
   3  -2   3  133.28    7.41
  -3  -2  -3  114.63    7.69
   3   2   3  118.03    7.43
  -3   2  -3  119.00    7.62
  -3   2  -3  104.86    8.23
   3   2   3  130.73    7.70
   4  -2   3   46.21    3.16
   4  -2   3   47.06    3.03
  -4  -2  -3   44.08    3.28
  -4  -2  -3   48.91    3.02
  -4  -2  -3   39.75    3.29
  -4   2  -3   40.08    3.00
   4   2   3   43.94    3.05
  -4   2  -3   41.82    3.38
  -4   2  -3   48.90    2.90
   4   2   3   50.11    3.01
  -5  -2  -3   16.59    1.51
  -5  -2  -3   16.46    1.48
   5  -2   3   18.04    1.47
  -5  -2  -3   19.84    1.61
   5  -2   3   17.76    1.45
  -5   2  -3   16.41    1.67
   5   2   3   19.67    1.30
   5   2   3   17.43    1.49
  -6  -2  -3   10.99    1.36
  -6  -2  -3   11.58    1.20
   6  -2   3   12.71    1.16
   6  -2   3   12.04    1.14
  -6   2  -3   11.25    1.44
   6   2   3   14.71    1.29
   7  -2   3   62.22    4.73
  -7  -2  -3   68.66    5.05
   7  -2   3   65.08    4.53
   7   2   3   72.50    4.65
  -7   2  -3   75.26    5.19
  -8  -2  -3    3.26    0.76
   8  -2   3    3.47    0.69
   8  -2   3    4.02    0.79
   8   2   3    4.43    0.84
  -8   2  -3    5.61    1.04
   9  -2   3   31.62    2.55
   9  -2   3   29.07    2.48
  -9  -2  -3   32.23    2.77
   9   2   3   29.68    2.55
  -9   2  -3   31.77    2.83
  10  -2   3   16.63    1.85
 -10  -2  -3   13.93    1.93
  10   2   3   13.68    1.78
 -10   2  -3   16.49    2.11
  11  -2   3   15.50    1.95
 -11  -2  -3   19.17    2.39
  11   2   3   17.86    2.19
 -11   2  -3   20.95    2.57
  12  -2   3    4.07    1.01
 -12  -2  -3    1.31    0.85
 -12   2  -3    2.51    0.91
  12   2   3    3.49    1.15
  13  -3  -3    1.41    0.69
 -13   3   3    1.12    0.67
  13   3  -3    0.31    0.67
  12  -3  -3   34.14    2.66
  12   3  -3   22.90    2.63
 -12   3   3   26.21    2.38
 -12   3   3   28.32    2.79
  11  -3  -3    9.05    1.35
 -11  -3   3    9.11    1.47
 -11   3   3    7.19    1.41
 -11   3   3    8.63    1.26
  11   3  -3    8.05    1.35
  10  -3  -3    0.76    0.42
 -10  -3   3    0.63    0.59
 -10  -3   3    0.87    0.45
  10  -3  -3    1.11    0.33
 -10   3   3    0.55    0.41
 -10   3   3    1.05    0.58
  10   3  -3    0.66    0.46
  -9  -3   3    8.13    1.24
  -9  -3   3    7.84    1.03
   9  -3  -3    7.59    0.71
   9  -3  -3    6.88    1.06
  -9   3   3    6.04    1.12
   9   3  -3    6.76    1.03
  -9   3   3    7.33    1.02
   8  -3  -3   66.96    4.29
   8  -3  -3   66.61    4.12
  -8  -3   3   62.92    4.30
  -8  -3   3   61.15    4.18
  -8  -3   3   66.87    4.77
  -8   3   3   66.59    4.27
  -8   3   3   51.65    4.57
  -8   3   3   60.67    4.74
   8   3  -3   67.86    4.31
  -7  -3   3   14.73    1.19
   7  -3  -3   11.28    1.05
  -7  -3   3   12.67    1.33
   7  -3  -3   12.59    1.18
  -7  -3   3   14.47    1.15
  -7   3   3   13.08    1.35
  -7   3   3   12.54    1.16
   7   3  -3   10.84    1.25
  -7   3   3   11.46    1.23
  -6  -3   3   21.84    1.66
   6  -3  -3   22.14    1.67
   6  -3  -3   21.14    1.61
  -6  -3   3   22.56    1.64
  -6   3   3   22.41    1.81
   6   3  -3   22.41    1.66
  -6   3   3   18.02    1.81
  -6   3   3   21.57    1.65
  -5  -3   3   92.08    5.99
  -5  -3   3   90.64    6.48
  -5  -3   3   92.03    5.67
  -5  -3   3   92.41    6.01
   5  -3  -3   90.50    5.95
   5   3  -3   92.45    5.70
  -5   3   3   93.85    5.71
  -5   3   3   87.49    6.34
  -5   3   3   92.02    6.38
   4  -3  -3   43.41    2.99
  -4  -3   3   45.64    2.85
  -4  -3   3   42.69    3.01
  -4  -3   3   49.31    3.04
  -4  -3   3   48.08    3.30
  -4   3   3   42.52    2.86
   4   3  -3   39.42    2.83
  -4   3   3   42.51    3.20
  -3  -3   3   10.54    0.82
  -3  -3   3    8.80    0.70
  -3  -3   3    9.89    0.80
   3  -3  -3    8.33    0.76
  -3   3   3    6.31    0.69
  -3   3   3    7.82    0.84
  -2  -3   3  128.01    8.08
  -2  -3   3  106.61    7.59
  -2  -3   3  125.91    7.55
   2  -3  -3  124.54    7.55
  -2   3   3  107.37    7.07
  -2   3   3  114.46    8.05
  -1  -3   3   11.98    1.20
   1  -3  -3   15.20    1.20
  -1  -3   3   19.56    1.18
  -1  -3   3   15.39    1.18
  -1   3   3   14.40    1.26
  -1   3   3   16.83    1.12
   0  -3   3   -0.07    0.17
   0  -3  -3    0.24    0.15
   0  -3   3    0.19    0.16
   0  -3  -3   -0.02    0.22
   0   3  -3    0.04    0.27
   0   3   3   -0.01    0.16
   0   3   3    0.05    0.17
  -1  -3  -3    7.29    0.64
   1  -3   3    6.87    0.63
   1  -3   3    6.06    0.60
  -1  -3  -3    8.45    0.80
   1   3   3    7.64    0.71
   1   3   3    5.91    0.70
  -1   3  -3    7.57    0.73
   2  -3   3   69.32    4.55
   2  -3   3   65.88    4.38
   2  -3   3   73.91    4.71
  -2  -3  -3   71.53    4.63
  -2  -3  -3   72.62    5.01
   2   3   3   72.33    4.48
   2   3   3   71.99    4.98
   3  -3   3   18.44    1.44
  -3  -3  -3   19.26    1.47
  -3  -3  -3   20.23    1.65
   3  -3   3   18.99    1.48
   3  -3   3   18.90    1.36
  -3   3  -3   20.45    1.73
   3   3   3   24.31    1.61
  -3   3  -3   20.27    1.42
  -4  -3  -3   74.08    4.78
  -4  -3  -3   60.85    4.47
  -4  -3  -3   68.08    4.38
   4  -3   3   66.68    4.22
   4  -3   3   59.61    4.45
   4  -3   3   66.28    4.24
  -4  -3  -3   70.65    4.71
   4   3   3   67.20    4.32
  -4   3  -3   66.86    4.81
  -5  -3  -3    8.49    0.97
  -5  -3  -3    7.11    0.84
  -5  -3  -3    9.74    0.75
   5  -3   3    5.51    0.80
   5  -3   3    6.54    0.80
  -5  -3  -3    7.06    0.95
  -5   3  -3    6.30    1.05
   5   3   3    5.20    0.84
  -6  -3  -3   19.87    1.64
   6  -3   3   22.82    1.78
  -6  -3  -3   21.43    1.91
   6  -3   3   22.30    1.76
  -6  -3  -3   24.74    1.93
   6   3   3   22.41    1.83
  -6   3  -3   22.25    2.05
  -7  -3  -3    0.19    0.41
   7  -3   3   -0.27    0.23
   7  -3   3    0.09    0.21
  -7  -3  -3   -0.36    0.18
   7   3   3    0.19    0.29
  -7   3  -3   -0.04    0.35
  -8  -3  -3   64.49    4.62
   8  -3   3   57.32    4.32
   8   3   3   52.10    4.18
  -8   3  -3   70.06    4.74
  -9  -3  -3    0.40    0.48
   9  -3   3    0.44    0.32
   9  -3   3    0.21    0.38
   9   3   3    0.32    0.44
  -9   3  -3    0.15    0.44
  10  -3   3   -0.23    0.37
 -10  -3  -3    0.37    0.42
  10  -3   3    0.12    0.32
 -10   3  -3   -0.31    0.40
  10   3   3   -0.11    0.40
 -11  -3  -3    2.41    0.96
  11  -3   3    1.02    0.55
  11   3   3    1.40    0.75
 -11   3  -3    3.26    1.01
  12  -3   3   21.98    2.47
 -12  -3  -3   22.59    2.78
 -12   3  -3   22.76    2.93
  12   3   3   19.50    2.50
  13  -4  -3    1.06    0.72
 -13   4   3    1.54    0.85
  13   4  -3    0.50    0.72
  12  -4  -3    1.29    0.62
  12   4  -3    2.66    0.94
 -12   4   3    1.38    0.73
 -12   4   3    1.08    0.67
 -11  -4   3    2.64    0.84
  11  -4  -3    1.00    0.49
  11  -4  -3    1.51    0.40
 -11   4   3    1.07    0.58
  11   4  -3    1.47    0.65
 -11   4   3    1.47    0.77
 -10  -4   3   75.80    5.67
  10  -4  -3   73.94    4.97
 -10  -4   3   73.44    4.95
  10  -4  -3   74.97    5.07
  10   4  -3   77.44    5.12
 -10   4   3   71.68    4.99
 -10   4   3   70.91    5.65
   9  -4  -3   -0.07    0.30
  -9  -4   3    0.37    0.35
  -9  -4   3    0.45    0.45
   9  -4  -3   -0.09    0.12
   9   4  -3    0.41    0.39
  -9   4   3    0.08    0.32
  -9   4   3    0.32    0.42
   8  -4  -3   16.83    1.56
  -8  -4   3   25.22    1.78
  -8  -4   3   18.03    1.53
  -8  -4   3   20.70    1.60
  -8   4   3   12.82    1.61
   8   4  -3   16.67    1.59
  -8   4   3   17.27    1.57
  -8   4   3   23.80    1.81
  -7  -4   3   15.28    1.37
   7  -4  -3   17.96    1.38
   7  -4  -3   17.56    1.48
  -7  -4   3   17.91    1.46
  -7  -4   3   16.54    1.66
  -7   4   3   17.53    1.45
  -7   4   3   16.15    1.67
  -7   4   3   17.22    1.56
   7   4  -3   16.89    1.46
   6  -4  -3  165.11   10.16
  -6  -4   3  170.54   11.57
  -6  -4   3  159.93   10.09
  -6  -4   3  169.92   10.71
   6  -4  -3  176.89   10.66
  -6   4   3  161.28   11.39
  -6   4   3  166.95   10.16
  -6   4   3  157.62   11.30
   6   4  -3  171.49   10.17
  -5  -4   3    0.66    0.28
   5  -4  -3    1.19    0.31
  -5  -4   3    0.86    0.39
  -5  -4   3    1.36    0.37
  -5   4   3    1.38    0.41
   5   4  -3    1.18    0.33
  -5   4   3    1.10    0.32
   5   4  -3    1.42    0.49
  -5   4   3    0.97    0.41
  -4  -4   3  172.57   11.99
  -4  -4   3  195.73   11.15
   4  -4  -3  193.50   11.86
  -4  -4   3  167.41   12.71
  -4  -4   3  198.67   11.90
   4   4  -3  190.93   11.17
  -4   4   3  192.85   11.20
  -4   4   3  180.51   12.65
  -3  -4   3    6.65    0.83
  -3  -4   3    6.14    0.76
  -3  -4   3    6.75    0.70
  -3  -4   3    6.71    0.58
   3  -4  -3    6.77    0.77
  -3   4   3    7.45    0.66
  -3   4   3    7.02    0.81
  -2  -4   3  129.39    8.33
  -2  -4   3  133.03    8.43
   2  -4  -3  129.99    8.34
  -2  -4   3  141.17    8.94
  -2   4   3  121.57    8.90
  -2   4   3  125.63    7.82
   1  -4  -3    0.26    0.18
  -1  -4   3    0.50    0.21
  -1  -4   3    0.32    0.17
   1  -4  -3    0.33    0.19
  -1   4   3    0.02    0.20
  -1   4   3    0.09    0.15
   0  -4  -3  145.91    8.83
   0  -4  -3  131.52    9.44
   0  -4   3  124.04    8.87
   0  -4   3  133.50    8.76
   0   4   3  148.22    9.45
   0   4   3  145.62    8.30
   1  -4   3   12.59    0.89
   1  -4   3    8.84    0.84
  -1  -4  -3   12.09    0.94
   1   4   3   11.17    0.99
   1   4   3    9.21    0.86
   2  -4   3    4.09    0.50
  -2  -4  -3    4.05    0.63
  -2  -4  -3    2.90    0.44
   2  -4   3    2.83    0.40
   2  -4   3    3.33    0.41
  -2   4  -3    3.28    0.52
   2   4   3    3.78    0.55
   2   4   3    3.11    0.52
   3  -4   3    0.08    0.19
  -3  -4  -3    0.20    0.20
  -3  -4  -3    0.34    0.30
   3  -4   3   -0.15    0.13
   3  -4   3    0.07    0.15
   3   4   3    0.01    0.26
  -3   4  -3   -0.32    0.33
  -3   4  -3    0.12    0.34
  -4  -4  -3  129.35    7.58
   4  -4   3  108.00    7.24
  -4  -4  -3  110.15    7.39
   4  -4   3  115.02    7.05
  -4  -4  -3  108.72    7.78
   4  -4   3  116.20    7.50
  -4  -4  -3  122.56    7.99
  -4   4  -3  108.62    7.28
  -4   4  -3  119.71    7.98
   4   4   3  112.91    7.15
   5  -4   3    3.73    0.63
  -5  -4  -3    4.55    0.70
   5  -4   3    3.27    0.52
  -5  -4  -3    4.59    0.66
  -5  -4  -3    2.89    0.49
   5  -4   3    3.76    0.34
  -5  -4  -3    4.85    0.76
   5   4   3    2.44    0.56
   6  -4   3    7.48    0.88
  -6  -4  -3    6.77    0.91
   6  -4   3    8.49    1.00
  -6  -4  -3    6.77    0.98
  -6  -4  -3   10.02    1.15
  -6  -4  -3    6.48    0.77
  -6   4  -3    9.45    1.24
   6   4   3    5.31    0.91
   7  -4   3    0.30    0.32
   7  -4   3    0.70    0.30
  -7  -4  -3    0.16    0.43
  -7  -4  -3    0.82    0.41
  -7   4  -3    0.55    0.46
   7   4   3    0.43    0.34
   8  -4   3    2.50    0.56
   8  -4   3    2.99    0.66
  -8  -4  -3    2.58    0.67
   8   4   3    2.46    0.69
   9  -4   3   -0.10    0.26
   9  -4   3   -0.19    0.26
  -9  -4  -3    0.12    0.32
  -9   4  -3    0.40    0.45
   9   4   3   -0.30    0.40
  10  -4   3    5.15    0.96
  10  -4   3    9.69    1.34
 -10  -4  -3   11.06    1.56
  10   4   3    7.46    1.33
 -10   4  -3    7.05    1.42
  11  -4   3    0.53    0.45
 -11  -4  -3   -0.75    0.44
  11   4   3   -0.08    0.56
 -11   4  -3    0.54    0.62
 -12  -4  -3    3.54    1.02
  12  -4   3    3.68    0.99
  12   4   3    1.95    0.95
 -12   4  -3    4.21    1.22
  13  -5  -3    0.47    0.53
  13   5  -3   -0.05    0.73
 -13   5   3    1.24    0.85
  12  -5  -3    4.77    1.05
  12  -5  -3    5.17    0.81
 -12  -5   3    5.17    1.16
 -12   5   3    5.15    1.06
  12   5  -3    6.87    1.32
 -12   5   3    6.41    1.33
  11  -5  -3   10.00    1.06
 -11  -5   3   12.53    1.65
  11  -5  -3    8.22    1.30
 -11   5   3    9.78    1.60
  11   5  -3    6.90    1.29
 -11   5   3    8.14    1.25
  10  -5  -3    0.05    0.18
  10  -5  -3   -0.09    0.31
 -10   5   3   -0.27    0.49
  10   5  -3    0.01    0.36
 -10   5   3    0.51    0.42
   9  -5  -3    0.18    0.32
  -9  -5   3    0.37    0.36
  -9   5   3    1.22    0.62
   9   5  -3    0.20    0.33
  -9   5   3    1.06    0.44
  -8  -5   3   23.65    2.22
   8  -5  -3   20.77    1.87
  -8  -5   3   26.16    1.96
  -8  -5   3   24.29    1.86
  -8   5   3   22.95    2.18
  -8   5   3   23.34    1.91
   8   5  -3   23.48    1.93
  -7  -5   3    0.09    0.22
  -7  -5   3    0.33    0.37
   7  -5  -3    0.09    0.20
   7  -5  -3   -0.21    0.22
  -7  -5   3    0.04    0.20
  -7   5   3    0.04    0.37
   7   5  -3    0.14    0.28
  -7   5   3   -0.05    0.27
   6  -5  -3   51.10    3.52
  -6  -5   3   51.75    3.45
   6  -5  -3   53.36    3.62
  -6  -5   3   55.68    3.72
  -6  -5   3   54.68    4.07
  -6   5   3   50.20    3.89
  -6   5   3   51.89    3.96
   6   5  -3   56.73    3.55
  -6   5   3   53.27    3.53
  -5  -5   3    1.64    0.39
  -5  -5   3    1.89    0.48
   5  -5  -3    1.97    0.40
  -5  -5   3    1.86    0.37
  -5   5   3    1.35    0.42
   5   5  -3    1.55    0.51
  -5   5   3    2.08    0.55
   5   5  -3    1.48    0.37
  -5   5   3    0.85    0.30
  -4  -5   3   69.10    4.56
  -4  -5   3   65.48    4.20
  -4  -5   3   70.18    4.59
  -4  -5   3   67.44    4.92
   4  -5  -3   62.57    4.49
  -4   5   3   67.16    4.27
   4   5  -3   71.74    4.25
  -4   5   3   69.03    4.83
   3  -5  -3   34.85    2.64
  -3  -5   3   33.58    2.66
  -3  -5   3   34.24    2.48
   3  -5  -3   35.03    2.47
  -3  -5   3   33.99    2.22
  -3  -5   3   33.33    2.47
  -3   5   3   43.26    2.66
  -3   5   3   35.33    2.31
   3   5  -3   32.01    2.23
   2  -5  -3  149.20   10.32
  -2  -5   3  160.94    9.67
   2  -5  -3  147.41    9.63
  -2  -5   3  155.92   10.31
  -2  -5   3  145.50    9.72
  -2   5   3  141.07   10.28
  -2   5   3  154.30    9.03
   1  -5  -3   -0.01    0.18
  -1  -5   3   -0.03    0.16
   1  -5  -3    0.26    0.22
  -1  -5   3    0.96    0.31
  -1  -5   3    0.21    0.12
  -1   5   3    0.12    0.21
  -1   5   3   -0.13    0.14
   0  -5   3    6.06    0.66
   0  -5  -3    6.41    0.75
   0  -5   3    7.76    0.72
   0  -5   3    7.08    0.64
   0  -5  -3    6.74    0.85
   0   5   3    6.16    0.83
   0   5   3    7.53    0.75
   1  -5   3   82.37    5.55
  -1  -5  -3   80.98    5.97
  -1  -5  -3   86.24    5.57
   1  -5   3   85.09    5.51
   1   5   3   87.96    5.98
   1   5   3   86.74    5.25
   2  -5   3  107.82    7.07
   2  -5   3  111.30    7.18
  -2  -5  -3  110.96    7.71
  -2  -5  -3  105.53    7.15
   2   5   3  112.93    7.70
   2   5   3  115.09    6.81
   3  -5   3   21.67    1.52
   3  -5   3   23.23    1.61
  -3  -5  -3   24.65    1.80
   3  -5   3   20.05    1.52
  -3  -5  -3   19.88    1.63
   3   5   3   19.71    1.62
  -3   5  -3   21.68    1.88
  -4  -5  -3   23.34    1.74
  -4  -5  -3   23.26    1.93
   4  -5   3   23.17    1.69
  -4  -5  -3   22.21    1.76
   4  -5   3   22.34    1.65
   4  -5   3   21.63    1.57
   4   5   3   20.67    1.75
  -4   5  -3   23.29    1.99
  -4   5  -3   22.94    1.71
  -5  -5  -3   36.10    2.66
  -5  -5  -3   38.70    2.83
   5  -5   3   38.38    2.60
  -5  -5  -3   43.44    2.83
   5  -5   3   36.92    2.68
  -5  -5  -3   35.19    2.95
  -5   5  -3   33.43    2.98
   5   5   3   38.36    2.72
   6  -5   3    7.82    0.92
  -6  -5  -3    8.00    1.12
  -6  -5  -3    9.25    1.11
  -6  -5  -3    7.74    1.01
   6  -5   3    8.54    1.01
  -6  -5  -3    8.03    0.92
   6   5   3    9.45    1.15
  -6   5  -3    9.36    1.34
  -7  -5  -3   26.22    2.19
   7  -5   3   26.50    2.05
   7  -5   3   27.22    2.07
  -7  -5  -3   26.13    2.33
   7   5   3   25.77    2.15
  -7   5  -3   23.42    2.39
  -8  -5  -3   36.84    2.79
  -8  -5  -3   29.06    2.74
   8  -5   3   29.39    2.50
   8  -5   3   36.26    2.57
   8   5   3   33.52    2.64
  -9  -5  -3   32.77    2.73
   9  -5   3   30.20    2.49
   9  -5   3   33.26    2.52
  -9   5  -3   29.56    2.84
   9   5   3   27.66    2.55
 -10  -5  -3    2.46    0.81
  10  -5   3    1.13    0.57
  10  -5   3    1.31    0.53
  10   5   3    1.07    0.65
 -10   5  -3    1.68    0.73
  11  -5   3   13.62    1.72
 -11  -5  -3   13.03    1.89
 -11   5  -3   10.88    1.93
  11   5   3   12.51    1.83
  12  -5   3   12.18    1.74
 -12   5  -3    9.69    1.86
  12   5   3   10.80    1.77
  12  -6  -3    0.62    0.54
 -12  -6   3    0.02    0.45
 -12   6   3    0.21    0.57
  12   6  -3    0.28    0.63
 -12   6   3    0.99    0.57
  11  -6  -3   14.40    1.74
 -11  -6   3   16.45    1.99
  11  -6  -3   14.01    1.19
 -11   6   3   13.58    1.99
  11   6  -3   14.85    1.80
 -11   6   3    9.84    1.51
  10  -6  -3   15.11    1.77
 -10  -6   3   14.43    1.87
  10   6  -3   16.83    1.82
 -10   6   3   16.19    1.77
 -10   6   3   14.58    2.01
   9  -6  -3   18.34    1.73
   9   6  -3   16.13    1.85
  -9   6   3   22.42    1.91
  -9   6   3   18.00    1.68
   8  -6  -3    7.26    0.98
  -8  -6   3    6.15    0.92
  -8  -6   3    5.49    1.08
  -8  -6   3    6.36    0.88
  -8   6   3    6.77    1.16
  -8   6   3    6.87    0.96
   8   6  -3    6.81    1.00
  -7  -6   3   52.92    3.57
  -7  -6   3   49.54    3.29
  -7  -6   3   50.87    3.93
   7  -6  -3   47.77    3.41
   7  -6  -3   49.60    3.39
  -7   6   3   49.02    3.37
  -7   6   3   42.88    3.66
   7   6  -3   50.75    3.40
  -7   6   3   53.12    3.81
  -6  -6   3   55.23    4.77
  -6  -6   3   66.24    4.46
   6  -6  -3   65.91    4.21
  -6  -6   3   64.79    4.12
   6  -6  -3   62.36    4.34
   6   6  -3   71.15    4.74
  -6   6   3   63.57    4.72
  -6   6   3   64.02    4.19
  -6   6   3   65.80    4.69
   6   6  -3   65.07    4.19
   5  -6  -3    1.78    0.42
  -5  -6   3    1.62    0.50
  -5  -6   3    1.25    0.39
  -5  -6   3    2.18    0.52
  -5  -6   3    2.00    0.37
  -5   6   3    2.08    0.44
  -5   6   3    1.53    0.47
   5   6  -3    1.04    0.48
   5   6  -3    1.68    0.39
   4  -6  -3   61.35    4.73
  -4  -6   3   69.88    4.51
  -4  -6   3   66.18    4.51
  -4  -6   3   64.11    4.09
  -4  -6   3   66.65    4.83
   4  -6  -3   63.11    4.43
  -4   6   3   69.84    4.20
  -4   6   3   68.36    4.76
  -3  -6   3   87.60    6.67
   3  -6  -3   89.96    6.20
  -3  -6   3   93.49    6.26
   3  -6  -3  100.33    6.68
  -3  -6   3   98.46    6.30
  -3   6   3   93.09    6.65
  -3   6   3  100.42    5.83
  -2  -6   3   56.65    3.75
   2  -6  -3   55.08    4.00
  -2  -6   3   47.86    3.69
  -2  -6   3   53.37    3.97
   2  -6  -3   55.24    3.73
  -2   6   3   57.90    4.01
  -2   6   3   56.70    3.44
  -1  -6   3   60.45    4.19
  -1  -6   3   60.32    4.45
  -1  -6   3   65.43    4.20
   1  -6  -3   57.83    4.19
   1  -6  -3   61.16    4.52
  -1   6   3   70.64    4.52
  -1   6   3   61.30    3.89
   0  -6  -3   58.84    4.19
   0  -6   3   63.53    4.18
   0  -6   3   65.73    4.43
   0  -6   3   60.10    4.16
   0  -6  -3   61.53    4.52
   0   6   3   63.82    3.91
   0   6   3   61.76    4.52
   1  -6   3   -0.04    0.11
  -1  -6  -3   -0.54    0.15
  -1  -6  -3   -0.01    0.17
   1  -6   3   -0.12    0.13
   1  -6   3    0.18    0.18
   1   6   3    0.24    0.25
   1   6   3    0.13    0.18
   2  -6   3   36.29    2.55
   2  -6   3   34.76    2.54
  -2  -6  -3   41.20    2.87
  -2  -6  -3   34.69    2.62
   2   6   3   36.80    2.50
   2   6   3   37.15    2.87
  -2   6  -3   37.66    2.83
   3  -6   3  151.09    8.76
  -3  -6  -3  155.38    9.43
   3  -6   3  143.89    9.41
   3  -6   3  144.71    9.27
  -3  -6  -3  136.48   10.10
  -3   6  -3  148.99    9.94
   3   6   3  137.29    8.89
   4  -6   3   42.58    2.92
   4  -6   3   40.19    2.99
  -4  -6  -3   40.73    3.04
   4  -6   3   45.74    2.88
  -4  -6  -3   46.85    3.39
  -4  -6  -3   44.55    3.11
   4   6   3   40.56    2.99
  -4   6  -3   47.92    3.35
   5  -6   3   -0.10    0.16
  -5  -6  -3    0.34    0.28
   5  -6   3    0.47    0.25
  -5  -6  -3    0.09    0.35
  -5  -6  -3    0.26    0.27
  -5  -6  -3    0.35    0.25
  -5   6  -3   -0.48    0.32
   5   6   3   -0.01    0.26
  -6  -6  -3    1.05    0.36
  -6  -6  -3    1.72    0.61
   6  -6   3    1.31    0.41
  -6  -6  -3    1.36    0.43
  -6  -6  -3    2.12    0.48
   6  -6   3    0.92    0.31
   6   6   3    1.23    0.50
  -6   6  -3    1.27    0.59
   7  -6   3   47.80    3.46
  -7  -6  -3   47.18    3.69
  -7  -6  -3   55.92    3.92
   7  -6   3   50.90    3.38
   7   6   3   43.42    3.44
  -7   6  -3   44.17    3.89
   8  -6   3    0.82    0.45
  -8  -6  -3    0.44    0.55
   8  -6   3    0.42    0.34
   8   6   3    0.88    0.46
  -8   6  -3    0.59    0.55
   9  -6   3   11.59    1.48
   9  -6   3   11.41    1.40
  -9   6  -3   16.90    1.95
   9   6   3   13.16    1.70
  10  -6   3    1.00    0.50
  10  -6   3    0.46    0.35
  10   6   3    0.35    0.56
 -10   6  -3    0.98    0.72
  11  -6   3    7.09    1.22
  11   6   3    6.69    1.35
 -11   6  -3    7.97    1.64
  12  -7  -3    2.89    0.80
 -12  -7   3    0.97    0.74
  12   7  -3    1.45    0.86
 -12   7   3    1.08    0.69
 -12   7   3    0.97    0.69
  11  -7  -3   22.77    2.45
 -11  -7   3   26.33    2.51
  11   7  -3   23.95    2.54
 -11   7   3   26.11    2.58
 -11   7   3   23.06    2.15
 -10  -7   3    4.42    1.09
  10  -7  -3    4.02    0.85
  10   7  -3    5.75    1.04
 -10   7   3    5.95    0.99
   9  -7  -3   18.99    1.65
  -9  -7   3   10.66    1.75
  -9   7   3   18.01    1.60
  -9   7   3   19.94    2.00
   9   7  -3   19.36    1.70
  -8  -7   3    0.49    0.40
   8  -7  -3    1.38    0.48
   8   7  -3    0.42    0.35
  -8   7   3    1.55    0.69
  -8   7   3    1.11    0.49
  -7  -7   3    5.97    1.01
   7  -7  -3    5.43    0.83
   7  -7  -3    5.90    0.81
  -7  -7   3    7.56    0.98
   7  -7  -3    6.23    0.90
  -7   7   3    6.50    0.98
  -7   7   3    4.63    0.96
   7   7  -3    5.21    1.01
  -7   7   3    6.66    0.93
   7   7  -3    6.35    0.89
  -6  -7   3   17.78    1.35
  -6  -7   3   11.23    1.16
   6  -7  -3   11.45    1.10
   6  -7  -3   11.37    1.11
  -6  -7   3   10.03    1.00
   6  -7  -3   12.81    1.23
   6   7  -3   12.51    1.44
  -6   7   3   12.50    1.48
   6   7  -3   12.00    1.10
  -6   7   3   11.15    1.21
  -6   7   3   11.72    1.35
  -5  -7   3   45.60    3.35
   5  -7  -3   46.44    3.49
  -5  -7   3   47.74    3.34
  -5  -7   3   47.38    3.62
  -5  -7   3   46.58    2.99
   5  -7  -3   44.71    3.25
  -5   7   3   42.70    3.46
  -5   7   3   47.99    3.09
   5   7  -3   47.03    3.43
   4  -7  -3    4.03    0.61
  -4  -7   3    3.83    0.71
   4  -7  -3    5.37    0.74
  -4  -7   3    4.67    0.53
  -4  -7   3    3.50    0.60
  -4  -7   3    3.90    0.68
   4   7  -3    4.68    0.58
  -4   7   3    3.50    0.54
  -4   7   3    4.13    0.70
  -3  -7   3   19.27    1.74
  -3  -7   3   21.27    1.61
  -3  -7   3   19.94    1.65
   3  -7  -3   21.06    1.74
   3  -7  -3   17.31    1.56
  -3   7   3   19.01    1.73
  -3   7   3   21.21    1.46
  -2  -7   3   18.22    1.52
   2  -7  -3   18.23    1.52
   2  -7  -3   17.85    1.61
  -2  -7   3   18.55    1.62
  -2  -7   3   19.34    1.48
  -1  -7   3   15.67    1.36
   1  -7  -3   15.18    1.41
  -1  -7   3   15.45    1.30
  -1  -7   3   17.25    1.27
   1  -7  -3   13.75    1.27
  -1   7   3   14.10    1.39
   0  -7   3   18.68    1.49
   0  -7  -3   17.53    1.63
   0  -7  -3   17.31    1.49
   0  -7   3   19.42    1.55
   0  -7   3   18.52    1.43
   0   7   3   18.90    1.67
  -1  -7  -3   94.43    6.15
   1  -7   3   92.38    6.43
   1  -7   3   93.54    6.10
   1  -7   3   93.80    6.09
  -1  -7  -3   87.69    6.59
   1   7   3   90.70    6.60
   1   7   3   95.69    5.73
   2  -7   3    0.67    0.22
   2  -7   3    0.56    0.26
  -2  -7  -3    0.16    0.24
   2  -7   3    0.70    0.21
  -2   7  -3    0.04    0.36
   2   7   3    0.77    0.28
   3  -7   3    0.55    0.23
  -3  -7  -3    1.06    0.32
   3  -7   3    0.83    0.24
  -3  -7  -3    0.75    0.43
  -3  -7  -3    0.83    0.36
   3   7   3    1.23    0.38
  -3   7  -3    0.36    0.44
   4  -7   3   46.40    3.27
  -4  -7  -3   53.08    3.42
  -4  -7  -3   50.93    3.41
   4  -7   3   47.04    3.22
   4  -7   3   43.00    3.06
  -4  -7  -3   47.44    3.66
  -4   7  -3   46.84    3.65
   4   7   3   47.16    3.27
  -5  -7  -3  196.73   12.67
   5  -7   3  191.46   12.52
  -5  -7  -3  172.03   13.38
  -5  -7  -3  200.75   12.49
  -5   7  -3  192.10   13.22
   5   7   3  211.45   11.96
  -6  -7  -3    0.63    0.36
  -6  -7  -3    1.23    0.41
   6  -7   3    1.46    0.43
   6  -7   3    1.59    0.39
   6   7   3    1.07    0.51
  -6   7  -3    0.92    0.59
  -7  -7  -3   48.67    3.63
   7  -7   3   45.91    3.28
   7  -7   3   40.11    3.11
  -7   7  -3   45.67    3.65
   7   7   3   45.72    3.37
   8  -7   3    9.05    1.05
   8  -7   3    5.74    0.93
  -8   7  -3    6.38    1.24
   8   7   3    2.28    0.81
  -9  -7  -3   34.55    3.13
   9  -7   3   38.12    2.80
   9  -7   3   33.23    2.71
   9   7   3   33.04    2.88
  -9   7  -3   35.29    3.21
  10  -7   3    1.99    0.71
  10   7   3   -0.26    0.59
 -10   7  -3    2.33    0.90
  11  -7   3   27.65    2.61
 -11   7  -3   32.57    3.19
  11   7   3   31.20    2.92
  12  -8  -3    0.32    0.60
 -12  -8   3    0.35    0.63
  12   8  -3   -0.21    0.69
 -12   8   3    0.96    0.71
 -11  -8   3    3.79    1.06
  11  -8  -3    3.47    0.91
  11   8  -3    2.35    0.80
 -11   8   3    2.94    1.04
 -11   8   3    4.45    0.98
 -10  -8   3    0.32    0.54
  10  -8  -3    0.44    0.50
  10   8  -3    0.36    0.53
 -10   8   3    0.42    0.49
 -10   8   3    0.50    0.53
   9  -8  -3    2.25    0.66
  -9  -8   3    1.66    0.71
   9   8  -3    1.90    0.63
  -9   8   3    3.01    0.66
  -9   8   3    1.93    0.79
  -8  -8   3    6.25    1.02
   8  -8  -3    5.72    0.94
  -8  -8   3    6.61    1.12
   8   8  -3    4.69    0.88
  -8   8   3    8.33    1.06
  -8   8   3    5.90    1.09
   7  -8  -3   42.72    2.91
  -7  -8   3   38.69    3.36
  -7  -8   3   44.39    3.13
  -7   8   3   46.08    2.94
  -7   8   3   41.42    3.31
   7   8  -3   32.12    2.80
  -6  -8   3    1.03    0.39
  -6  -8   3    0.84    0.37
   6  -8  -3    0.29    0.29
   6  -8  -3    1.40    0.41
   6  -8  -3    0.68    0.33
  -6   8   3    1.35    0.54
   6   8  -3    0.97    0.38
  -6   8   3    0.72    0.34
   5  -8  -3    0.56    0.32
  -5  -8   3    0.83    0.38
  -5  -8   3    0.58    0.37
   5  -8  -3    0.98    0.37
  -5  -8   3    1.66    0.41
  -5   8   3    0.57    0.43
  -5   8   3    0.80    0.30
  -4  -8   3   10.57    1.49
   4  -8  -3   16.12    1.44
  -4  -8   3   13.51    1.36
  -4  -8   3   17.02    1.36
   4  -8  -3   14.25    1.30
  -4   8   3   17.09    1.23
  -4   8   3   14.78    1.46
   3  -8  -3  103.24    7.20
  -3  -8   3  108.64    7.27
  -3  -8   3  108.32    7.77
   3  -8  -3  105.39    7.71
  -3  -8   3  113.19    7.29
  -3   8   3  118.91    7.71
  -2  -8   3    0.74    0.36
   2  -8  -3    0.96    0.37
  -2  -8   3    0.92    0.36
  -2  -8   3    1.38    0.34
   2  -8  -3    1.09    0.35
  -2   8   3    1.13    0.28
  -1  -8   3   66.05    4.48
  -1  -8   3   66.04    4.79
   1  -8  -3   64.88    4.85
  -1  -8   3   68.00    4.53
   1  -8  -3   65.50    4.53
  -1   8   3   62.29    4.84
  -1   8   3   68.80    4.14
   0  -8  -3   21.69    1.73
   0  -8   3   21.87    1.76
   0  -8   3   21.64    1.70
   0  -8   3   19.25    1.59
   0  -8  -3   19.27    1.83
   0   8   3   20.01    1.50
   0   8   3   24.16    1.87
   1  -8   3   15.93    1.25
  -1  -8  -3   17.94    1.44
   1  -8   3   15.57    1.32
   1  -8   3   14.78    1.33
  -1  -8  -3   14.20    1.45
   1   8   3   14.42    1.51
  -1   8  -3   15.91    1.48
  -2  -8  -3    8.29    1.00
  -2  -8  -3    6.62    1.02
   2  -8   3    7.70    0.76
   2  -8   3    6.56    0.69
   2  -8   3    7.62    0.89
   2   8   3    6.53    0.82
  -2   8  -3    5.60    0.92
  -3  -8  -3   70.61    4.97
  -3  -8  -3   78.52    5.45
   3  -8   3   67.97    4.83
  -3  -8  -3   71.11    4.95
   3  -8   3   72.95    4.87
  -3   8  -3   72.46    5.24
   3   8   3   77.84    4.72
  -4  -8  -3   10.76    1.11
  -4  -8  -3   11.88    1.34
   4  -8   3   10.83    1.01
   4  -8   3   12.92    1.07
  -4  -8  -3   11.74    1.48
   4   8   3   12.03    1.32
  -4   8  -3   13.87    1.55
   5  -8   3    1.58    0.36
  -5  -8  -3    1.64    0.46
  -5  -8  -3    2.29    0.66
  -5  -8  -3    1.71    0.51
  -5   8  -3    2.00    0.70
   5   8   3    2.04    0.58
  -6  -8  -3    7.79    1.12
  -6  -8  -3   15.12    1.31
   6  -8   3   10.14    0.99
  -6  -8  -3   11.30    1.28
   6   8   3    8.79    1.25
  -6   8  -3    8.37    1.45
  -7  -8  -3   75.58    5.42
   7  -8   3   73.37    4.97
  -7   8  -3   68.42    5.45
   7   8   3   67.04    4.92
  -8  -8  -3    1.21    0.58
   8  -8   3    0.75    0.37
  -8   8  -3    0.90    0.63
   8   8   3   -0.21    0.51
  -9  -8  -3   22.02    2.49
   9  -8   3   27.10    2.27
  -9   8  -3   31.30    2.84
   9   8   3   29.64    2.53
  10   8   3   14.62    2.06
 -10   8  -3   16.97    2.35
 -11   8  -3    1.44    0.88
  11   8   3    1.71    1.02
 -11  -9   3    5.26    1.29
 -10  -9   3    2.79    0.92
 -10   9   3    4.26    1.02
  -9  -9   3    4.36    1.01
  -9   9   3    4.03    1.06
  -8  -9   3   62.60    5.17
  -8  -9   3   60.08    4.70
  -8   9   3   75.42    4.68
  -8   9   3   66.83    5.08
  -7  -9   3    0.27    0.32
  -7  -9   3    0.84    0.42
  -7   9   3    0.32    0.39
   6  -9  -3   17.20    1.53
   6  -9  -3   15.31    1.41
  -6  -9   3   16.65    1.54
  -6  -9   3   13.99    1.79
  -6   9   3   13.24    1.61
  -5  -9   3   44.07    2.95
   5  -9  -3   38.04    3.03
  -5  -9   3   36.10    3.16
   5  -9  -3   38.20    2.86
  -5  -9   3   37.13    2.93
  -5   9   3   36.99    3.06
  -4  -9   3   43.35    3.00
  -4  -9   3   35.08    2.98
  -4  -9   3   41.60    3.27
   4  -9  -3   40.98    3.17
   4  -9  -3   39.24    2.96
  -4   9   3   41.75    3.21
   3  -9  -3    8.04    1.13
  -3  -9   3    9.37    1.09
   3  -9  -3    8.55    1.10
  -3  -9   3   11.35    1.34
  -3  -9   3   10.40    1.24
  -3   9   3   14.32    1.18
  -2  -9   3   89.98    6.74
  -2  -9   3   94.38    6.34
   2  -9  -3   94.86    6.77
   2  -9  -3   97.25    6.34
  -2  -9   3   97.09    6.34
  -2   9   3   92.47    6.78
   1  -9  -3   21.94    1.86
  -1  -9   3   24.69    1.81
  -1  -9   3   20.33    1.91
   1  -9  -3   21.84    1.99
  -1  -9   3   26.68    1.92
  -1   9   3   22.23    2.03
   0  -9   3   10.33    1.00
   0  -9  -3   10.80    1.29
   0  -9   3   10.68    1.09
   0  -9   3   12.26    1.15
   0  -9  -3   11.44    1.23
   0   9   3   12.66    1.26
   1  -9   3   35.35    2.69
   1  -9   3   33.70    2.57
  -1  -9  -3   33.29    2.63
   1  -9   3   35.89    2.51
  -1  -9  -3   33.96    2.84
   1   9   3   35.93    2.38
   2  -9   3   59.44    4.24
  -2  -9  -3   58.68    4.16
   2  -9   3   56.12    4.05
   2  -9   3   60.65    4.03
  -2  -9  -3   62.20    4.54
  -2   9  -3   56.13    4.28
  -3  -9  -3    0.97    0.39
   3  -9   3    0.50    0.23
   3  -9   3    1.32    0.38
  -3  -9  -3    0.66    0.30
  -3   9  -3    0.80    0.52
   3   9   3    1.53    0.43
   4  -9   3    3.58    0.60
  -4  -9  -3    4.75    0.74
  -4  -9  -3    2.45    0.62
   4  -9   3    4.01    0.57
  -4   9  -3    3.27    0.79
   4   9   3    4.00    0.72
  -5  -9  -3   65.97    4.59
  -5  -9  -3   71.80    4.92
   5  -9   3   62.39    4.42
  -5  -9  -3   62.44    4.57
   5   9   3   58.92    4.34
  -5   9  -3   68.19    4.94
  -6  -9  -3   28.14    2.30
  -6  -9  -3   24.06    2.25
   6  -9   3   29.48    2.18
   6   9   3   31.60    2.37
  -6   9  -3   28.02    2.59
  -7  -9  -3    9.33    1.48
   7  -9   3    9.88    1.15
   7   9   3   12.76    1.55
  -7   9  -3    8.85    1.49
  -8  -9  -3   12.87    1.77
   8  -9   3   12.86    1.32
  -8   9  -3   14.79    1.96
   8   9   3   13.45    1.77
  -9  -9  -3    0.30    0.54
  -9   9  -3   -0.50    0.52
   9   9   3   -0.30    0.72
  10   9   3   -0.54    0.80
 -10   9  -3    0.25    0.50
 -11 -10   3   -0.26    0.47
 -10 -10   3   18.31    2.38
  -9 -10   3    0.71    0.57
  -8 -10   3    0.70    0.51
  -7 -10   3   -0.16    0.34
  -7 -10   3    0.04    0.32
   6 -10  -3   34.31    2.82
   6 -10  -3   34.15    2.59
  -6 -10   3   33.85    2.70
  -6 -10   3   31.60    2.90
  -6  10   3   30.83    2.76
  -5 -10   3    0.32    0.27
   5 -10  -3    0.13    0.30
   5 -10  -3    0.04    0.25
  -5 -10   3    0.49    0.42
  -5 -10   3    0.40    0.41
  -5  10   3    0.68    0.48
  -4 -10   3   23.12    2.05
   4 -10  -3   25.31    2.11
   4 -10  -3   23.02    1.98
  -4 -10   3   22.35    2.15
  -4 -10   3   24.62    1.98
  -4  10   3   24.21    2.18
  -3 -10   3   14.14    1.36
  -3 -10   3   17.07    1.50
  -3 -10   3   10.39    1.52
   3 -10  -3   13.15    1.46
   3 -10  -3   16.65    1.48
  -3  10   3   21.56    1.58
  -2 -10   3    1.26    0.44
   2 -10  -3    0.99    0.46
  -2 -10   3    0.28    0.32
  -2 -10   3    0.95    0.34
   2 -10  -3    1.11    0.41
  -2  10   3    1.14    0.51
  -1 -10   3   12.48    1.19
  -1 -10   3   13.23    1.30
  -1 -10   3   12.20    1.32
   1 -10  -3   11.62    1.41
   1 -10  -3   14.14    1.40
  -1  10   3   16.72    1.43
   0 -10  -3   45.54    3.81
   0 -10   3   50.67    3.48
   0 -10  -3   54.56    3.66
   0 -10   3   47.10    3.53
   0 -10   3   48.78    3.72
  -1 -10  -3    0.58    0.35
   1 -10   3    0.94    0.27
   1 -10   3    0.91    0.38
  -1 -10  -3    1.15    0.47
   1 -10   3    0.51    0.32
   2 -10   3   43.37    3.00
   2 -10   3   40.47    3.08
  -2 -10  -3   40.06    3.04
  -2 -10  -3   40.20    2.92
  -2 -10  -3   42.40    3.34
   2 -10   3   37.62    2.87
   3 -10   3    5.95    0.83
   3 -10   3    5.81    0.72
  -3 -10  -3    4.25    0.70
  -3 -10  -3    5.37    0.91
  -3 -10  -3    6.54    0.97
  -4 -10  -3   41.31    3.41
  -4 -10  -3   42.91    3.17
  -4 -10  -3   41.30    3.08
   4 -10   3   39.76    2.92
  -4  10  -3   39.92    3.31
  -5 -10  -3    0.00    0.29
  -5 -10  -3    0.23    0.31
   5 -10   3   -0.02    0.21
  -5  10  -3    0.53    0.57
  -6 -10  -3  119.12    8.50
  -6 -10  -3  112.04    7.81
   6 -10   3  131.14    7.75
  -6 -10  -3   96.04    7.78
  -6  10  -3  119.63    8.32
   7 -10   3    4.56    0.72
  -7 -10  -3    2.35    0.76
  -7  10  -3    3.85    1.06
  -8 -10  -3   -0.23    0.41
   8 -10   3   -0.04    0.24
  -8  10  -3    0.32    0.67
   8  10   3    0.99    0.63
  -9 -10  -3    0.35    0.51
   9  10   3    0.26    0.65
  -9  10  -3   -0.64    0.51
 -10 -10  -3   43.10    4.02
 -10  10  -3   51.79    4.33
  10  10   3   45.62    3.95
 -10 -11   3    0.18    0.58
  -9 -11   3    0.78    0.62
  -8 -11   3   46.98    4.05
  -7 -11   3    1.28    0.66
   6 -11  -3   27.73    2.35
  -6 -11   3   29.81    2.72
  -5 -11   3   -0.20    0.31
   5 -11  -3    0.43    0.35
  -5 -11   3    0.10    0.27
   5 -11  -3    0.02    0.34
  -5 -11   3   -0.12    0.33
  -5  11   3   -0.07    0.52
   4 -11  -3  100.24    6.52
   4 -11  -3   96.24    6.88
  -4 -11   3   99.74    7.03
  -4 -11   3   80.70    6.44
  -4 -11   3   97.04    6.51
  -4  11   3   95.59    6.94
  -3 -11   3    5.46    0.88
   3 -11  -3    7.34    1.10
   3 -11  -3    6.09    1.05
  -3 -11   3    5.70    1.05
  -3 -11   3    6.40    1.00
  -3  11   3   11.39    1.05
  -2 -11   3  124.63    8.58
  -2 -11   3  112.10    7.99
  -2 -11   3  120.19    8.04
   2 -11  -3  112.57    8.01
   2 -11  -3  119.48    8.56
  -2  11   3  131.98    8.58
  -1 -11   3    1.50    0.49
  -1 -11   3    3.02    0.57
   1 -11  -3    2.64    0.63
  -1 -11   3    1.96    0.55
   1 -11  -3    2.94    0.67
   0 -11   3    3.98    0.74
   0 -11   3    5.32    0.72
   0 -11  -3    5.20    0.90
   0 -11  -3    6.02    1.00
   0 -11   3    4.51    0.79
  -1 -11  -3    1.05    0.40
   1 -11   3    1.43    0.46
   1 -11   3    0.77    0.35
  -1 -11  -3    0.71    0.42
   1 -11   3    1.19    0.36
  -1 -11  -3    1.25    0.34
   2 -11   3   61.74    4.22
  -2 -11  -3   62.14    4.39
  -2 -11  -3   55.63    4.68
  -2 -11  -3   62.46    4.26
   2 -11   3   61.36    4.30
  -3 -11  -3   -0.20    0.25
   3 -11   3    0.14    0.21
  -3 -11  -3   -0.17    0.28
   3 -11   3    0.53    0.31
  -3 -11  -3   -0.03    0.30
  -4 -11  -3    7.93    1.17
   4 -11   3    6.42    0.85
  -4 -11  -3    8.48    1.31
  -4 -11  -3    7.90    1.01
  -5 -11  -3    7.30    1.34
   5 -11   3    9.78    0.98
  -5 -11  -3    9.93    1.25
  -5 -11  -3    9.09    1.29
  -6 -11  -3   10.98    1.39
  -6 -11  -3    9.41    1.38
   6 -11   3   11.02    1.07
  -6 -11  -3    8.09    1.42
   7 -11   3    2.01    0.54
  -7 -11  -3    3.12    0.91
  -7  11  -3    3.56    1.00
  -8 -11  -3   19.63    2.35
  -8  11  -3   14.38    2.10
  -9 -11  -3    8.25    1.49
  -9  11  -3    5.90    1.40
 -10 -12   3   11.62    1.95
  -9 -12   3    8.19    1.55
  -8 -12   3   -0.17    0.40
  -7 -12   3   36.08    3.27
  -6 -12   3   16.44    2.08
   5 -12  -3    0.16    0.33
  -5 -12   3    0.08    0.37
  -5 -12   3    0.58    0.37
   5 -12  -3   -0.39    0.31
  -5  12   3    0.25    0.61
   4 -12  -3   27.33    2.45
   4 -12  -3   26.73    2.35
  -4 -12   3   30.63    2.36
  -4 -12   3   26.87    2.57
  -4  12   3   28.65    2.61
  -3 -12   3   40.03    3.01
  -3 -12   3   38.51    3.06
   3 -12  -3   39.81    3.24
   3 -12  -3   36.72    3.03
  -3 -12   3   34.91    3.23
  -3  12   3   44.41    3.29
  -2 -12   3    1.90    0.59
  -2 -12   3    1.98    0.50
   2 -12  -3    1.69    0.56
  -2 -12   3    1.79    0.59
   2 -12  -3    1.27    0.56
  -1 -12   3   22.31    1.81
  -1 -12   3   20.16    1.87
   1 -12  -3   19.18    1.86
  -1 -12   3   22.12    2.00
   1 -12  -3   21.77    2.05
   0 -12   3   23.27    2.02
   0 -12  -3   22.13    1.72
   0 -12  -3   22.51    2.14
   0 -12   3   22.14    1.93
   0 -12   3   19.66    1.77
   0 -12  -3   21.96    1.94
  -1 -12  -3   18.02    1.85
   1 -12   3   16.70    1.47
   1 -12   3   19.80    1.69
  -1 -12  -3   15.08    1.59
   1 -12   3   16.79    1.60
  -1 -12  -3   16.36    1.45
   2 -12   3   21.89    1.92
  -2 -12  -3   22.54    2.18
   2 -12   3   23.29    1.83
  -2 -12  -3   23.46    2.05
  -2 -12  -3   21.05    1.84
   3 -12   3   46.05    3.16
   3 -12   3   42.89    3.22
  -3 -12  -3   41.23    3.21
  -3 -12  -3   41.92    3.63
  -4 -12  -3    6.77    1.02
  -4 -12  -3    9.34    1.44
   4 -12   3    8.79    1.02
  -5 -12  -3    0.34    0.46
  -5 -12  -3    0.91    0.44
   5 -12   3    0.40    0.29
  -6 -12  -3   42.34    3.88
   6 -12   3   47.59    3.36
  -7 -12  -3   11.13    1.74
  -8 -12  -3    0.54    0.50
  -9 -13   3    5.97    1.47
  -8 -13   3   10.06    1.74
  -7 -13   3    3.17    1.01
  -6 -13   3    4.62    1.06
  -5 -13   3   38.51    3.40
   4 -13  -3   24.17    2.26
  -4 -13   3   25.60    2.15
  -4 -13   3   22.91    2.33
  -3 -13   3   22.84    2.31
  -3 -13   3   25.17    2.10
   3 -13  -3   24.09    2.25
   2 -13  -3    2.77    0.75
  -2 -13   3    2.11    0.58
  -2 -13   3    3.34    0.79
  -1 -13   3   30.79    2.60
   1 -13  -3   29.72    2.18
   1 -13  -3   28.49    2.65
  -1 -13   3   27.26    2.32
   0 -13   3    0.60    0.34
   0 -13   3    0.14    0.28
   0 -13  -3    0.11    0.34
   0 -13  -3    0.37    0.24
   1 -13   3   71.95    5.39
   1 -13   3   72.50    5.12
  -1 -13  -3   70.08    5.56
  -1 -13  -3   72.46    5.01
   1 -13   3   73.53    5.04
   2 -13   3    9.33    1.13
   2 -13   3    8.73    1.23
  -2 -13  -3   10.04    1.49
  -2 -13  -3   11.23    1.27
  -3 -13  -3    1.45    0.64
  -3 -13  -3    1.86    0.51
   3 -13   3    1.67    0.58
   3 -13   3    3.06    0.56
  -4 -13  -3    0.25    0.35
   4 -13   3    0.03    0.26
  -4 -13  -3    0.36    0.44
  -5 -13  -3   56.58    4.69
   5 -13   3   58.00    4.06
  -5 -13  -3   54.14    4.21
  -6 -13  -3    1.74    0.86
  -7 -13  -3   12.87    2.05
  -8 -13  -3   -0.10    0.49
  -8 -14   3    0.62    0.68
  -7 -14   3   26.69    2.76
  -6 -14   3   10.88    1.76
  -5 -14   3   -0.10    0.43
  -4 -14   3    2.81    0.72
  -4 -14   3    4.98    1.09
   4 -14  -3    2.67    0.79
  -3 -14   3   89.81    6.88
   3 -14  -3   89.19    6.80
  -3 -14   3   91.84    6.38
   3 -14  -3   92.48    6.03
   2 -14  -3    3.28    0.53
  -2 -14   3    4.29    0.94
   2 -14  -3    3.19    0.88
  -2 -14   3    3.05    0.68
  -1 -14   3   25.75    2.21
   1 -14  -3   26.95    2.54
   1 -14  -3   25.74    2.06
  -1 -14   3   29.35    2.50
   0 -14   3    2.58    0.60
   0 -14  -3    4.19    0.94
   0 -14  -3    3.72    0.65
   0 -14   3    2.89    0.77
   1 -14   3   22.75    1.90
  -1 -14  -3   20.79    1.85
  -1 -14  -3   23.55    2.29
   2 -14   3    0.77    0.35
  -2 -14  -3    0.88    0.40
  -2 -14  -3    0.11    0.47
   3 -14   3   52.37    3.82
  -3 -14  -3   54.11    3.93
  -3 -14  -3   50.34    4.38
  -4 -14  -3    1.92    0.79
  -4 -14  -3    3.19    0.73
  -5 -14  -3   -0.24    0.35
  -5 -14  -3    0.59    0.51
  -6 -14  -3    0.62    0.69
  -7 -14  -3   27.25    2.90
  -6 -15   3    0.66    0.61
  -5 -15   3    6.85    1.34
   5 -15  -3    7.48    0.76
  -4 -15   3    5.82    1.02
   4 -15  -3    6.98    0.80
  -4 -15   3    8.63    1.43
   4 -15  -3    6.50    1.28
  -3 -15   3    1.86    0.59
  -3 -15   3    2.37    0.85
   3 -15  -3    1.42    0.38
   3 -15  -3    0.82    0.52
  -2 -15   3   14.45    1.91
   2 -15  -3   14.42    1.33
   2 -15  -3   15.21    1.92
  -2 -15   3   15.03    1.68
   1 -15  -3    1.04    0.62
  -1 -15   3    1.38    0.51
  -1 -15   3    1.55    0.64
   0 -15   3    2.74    0.67
   0 -15  -3    3.46    0.93
   0 -15   3    3.93    0.90
  -1 -15  -3   40.08    3.55
  -2 -15  -3   15.68    2.09
  -3 -15  -3    1.20    0.75
  -4 -15  -3    8.14    1.52
  -5 -15  -3   61.01    5.13
  -5 -16   3    3.64    1.09
  -4 -16   3   23.35    2.48
   3 -16  -3   10.02    1.58
  -3 -16   3   11.11    1.71
  -2 -16   3   12.51    1.80
   2 -16  -3   11.49    1.68
  -1 -16   3    1.89    0.76
   1 -16  -3    1.46    0.68
   0 -16  -3   49.84    4.26
  -1 -16  -3    2.00    0.83
  -2 -16  -3   -0.21    0.39
  -3 -16  -3    6.75    1.40
   1 -17  -3    1.30    0.80
  -1 -17   3    1.90    0.83
   0 -17  -3    0.39    0.60
  13   0  -4    0.48    0.68
 -13   0   4   -0.41    0.37
 -12   0   4    0.49    0.46
  12   0  -4    0.75    0.68
  11   0  -4    0.03    0.43
 -11   0   4    0.37    0.37
  10   0  -4   28.17    2.36
 -10   0   4   27.70    2.26
 -10   0   4   28.06    2.54
   9   0  -4   -0.07    0.27
  -9   0   4   -0.76    0.43
  -9   0   4   -0.18    0.24
   8   0  -4  118.58    7.86
  -8   0   4  121.12    8.08
  -8   0   4  129.67    7.86
  -8   0   4  130.67    8.84
   7   0  -4    0.00    0.24
  -7   0   4   -0.06    0.21
  -7   0   4    0.50    0.35
  -7   0   4   -0.06    0.20
  -6   0   4    3.67    0.68
   6   0  -4    3.60    0.44
  -6   0   4    3.46    0.58
  -6   0   4    3.84    0.57
   5   0  -4   -0.07    0.08
  -5   0   4    0.04    0.27
  -5   0   4   -0.05    0.20
  -5   0   4   -0.21    0.16
   4   0  -4   10.88    0.86
  -4   0   4   14.46    1.07
  -4   0   4   10.85    0.97
   4   0  -4   10.98    1.06
  -4   0   4   10.36    0.93
   3   0  -4   -0.13    0.09
  -3   0   4   -0.07    0.15
  -3   0   4    0.00    0.26
  -3   0   4   -0.13    0.14
  -2   0   4    7.03    0.67
  -2   0   4    6.78    0.62
   2   0  -4    6.78    0.57
  -2   0   4    5.83    0.61
  -1   0   4   -0.45    0.16
  -1   0   4   -0.25    0.14
  -1   0   4   -0.32    0.13
  -1   0   4   -0.21    0.14
   1   0  -4   -0.23    0.13
   0   0   4   12.61    1.00
   0   0   4   15.37    1.09
   0   0   4   14.01    1.02
   0   0  -4   11.38    1.04
  -1   0  -4   -0.27    0.25
   1   0   4    0.02    0.18
   1   0   4   -0.03    0.11
   1   0   4    0.16    0.22
   2   0   4   93.59    6.31
   2   0   4  105.55    5.95
  -2   0  -4   87.55    6.63
   3   0   4    0.19    0.21
  -3   0  -4    0.03    0.20
  -3   0  -4    0.03    0.21
  -3   0  -4   -0.19    0.25
   4   0   4   14.53    1.22
   4   0   4   14.85    1.19
  -4   0  -4   11.84    1.31
  -4   0  -4   13.59    1.02
   5   0   4    0.22    0.21
  -5   0  -4   -0.14    0.18
  -5   0  -4   -0.07    0.32
   5   0   4    0.25    0.25
  -5   0  -4   -0.10    0.20
  -6   0  -4   56.39    4.07
   6   0   4   48.86    3.60
   7   0   4   -0.38    0.29
  -7   0  -4    0.13    0.30
   8   0   4   66.25    4.79
  -8   0  -4   74.08    5.39
  -9   0  -4    0.05    0.35
   9   0   4    0.25    0.38
  10   0   4    0.01    0.39
 -10   0  -4   -0.23    0.40
  11   0   4   -0.40    0.34
 -11   0  -4   -0.60    0.46
 -12   0  -4   52.32    4.60
  12   0   4   51.50    4.09
  13  -1  -4    8.71    1.48
 -13  -1   4    7.72    1.30
  13   1  -4    9.98    1.66
 -13   1   4    8.52    1.44
 -12  -1   4   14.45    1.75
  12  -1  -4   16.14    1.94
  12   1  -4   11.97    1.77
 -12   1   4   14.53    1.79
 -11  -1   4    0.24    0.57
 -11  -1   4    0.02    0.37
  11  -1  -4    0.33    0.42
 -11   1   4    0.16    0.41
  11   1  -4    0.38    0.48
 -10  -1   4   51.00    3.61
 -10  -1   4   54.21    4.07
  10  -1  -4   54.40    3.74
 -10   1   4   44.87    3.93
  10   1  -4   50.64    3.70
 -10   1   4   49.20    3.61
  -9  -1   4   11.10    1.46
  -9  -1   4    9.78    1.25
   9  -1  -4   11.26    1.40
  -9   1   4   11.21    1.36
   9   1  -4   11.92    1.44
  -9   1   4   12.60    1.52
   8  -1  -4    0.37    0.30
  -8  -1   4   -0.13    0.21
  -8  -1   4    0.10    0.30
  -8   1   4    0.25    0.29
  -8   1   4    0.46    0.43
   8   1  -4   -0.06    0.25
   7  -1  -4   18.33    1.52
  -7  -1   4   18.59    1.49
  -7  -1   4   16.11    1.45
  -7  -1   4   17.28    1.66
  -7   1   4   15.13    1.43
   7   1  -4   18.05    1.51
  -7   1   4   17.69    1.63
  -7   1   4   20.08    1.45
   6  -1  -4  167.67   10.72
  -6  -1   4  167.01   10.24
  -6  -1   4  173.72   10.78
  -6  -1   4  170.77   11.61
   6   1  -4  170.10   10.85
  -6   1   4  160.18   11.56
   6   1  -4  163.18   10.27
  -6   1   4  174.86   10.76
  -6   1   4  167.54   10.26
  -5  -1   4    0.31    0.30
  -5  -1   4    0.39    0.22
   5  -1  -4    0.46    0.10
  -5  -1   4    0.69    0.26
  -5   1   4    0.77    0.28
   5   1  -4    0.61    0.20
  -5   1   4    0.52    0.26
   4  -1  -4   24.68    2.01
  -4  -1   4   28.06    2.05
  -4  -1   4   25.16    1.78
  -4  -1   4   27.33    1.88
   4   1  -4   24.50    2.04
   4   1  -4   25.61    1.79
  -4   1   4   24.66    1.78
  -4   1   4   24.59    1.83
  -4   1   4   24.45    2.00
  -3  -1   4   41.37    2.49
  -3  -1   4   37.33    2.61
  -3  -1   4   39.04    2.53
  -3  -1   4   32.73    2.78
  -3   1   4   34.76    2.78
  -3   1   4   40.05    2.61
  -3   1   4   36.13    2.47
   3   1  -4   41.25    2.59
   2  -1  -4  257.82   15.93
  -2  -1   4  244.57   14.89
  -2  -1   4  246.76   16.91
  -2  -1   4  254.34   15.82
  -2   1   4  254.12   15.82
   2   1  -4  272.47   16.05
  -2   1   4  245.67   14.92
  -2   1   4  235.44   16.89
  -1  -1   4    0.38    0.18
  -1  -1   4    0.44    0.21
  -1  -1   4    0.17    0.16
   1  -1  -4    0.13    0.12
  -1  -1   4    0.23    0.21
  -1   1   4    0.19    0.17
  -1   1   4    0.34    0.19
   0  -1   4  156.32   11.23
   0  -1  -4  158.87   11.04
   0  -1   4  177.07   11.05
   0  -1   4  195.10   10.47
   0   1   4  181.01   11.81
   0   1   4  184.50   10.49
  -1  -1  -4   25.15    1.84
   1  -1   4   26.48    1.93
   1  -1   4   25.21    1.81
   1  -1   4   24.90    1.81
   1   1   4   28.59    1.86
  -1   1  -4   29.06    1.88
   2  -1   4   18.51    1.31
   2  -1   4   18.57    1.40
  -2  -1  -4   18.40    1.37
  -2  -1  -4   19.63    1.38
   2  -1   4   19.71    1.48
   2   1   4   16.48    1.39
  -2   1  -4   19.39    1.63
   3  -1   4    8.93    1.01
  -3  -1  -4    8.82    0.79
  -3  -1  -4    8.71    0.80
  -3  -1  -4    8.88    0.96
   3  -1   4   11.07    0.85
  -3  -1  -4    8.82    0.90
  -3   1  -4    9.45    0.83
   3   1   4   10.77    0.95
  -3   1  -4    9.38    1.15
  -4  -1  -4  121.39    9.59
   4  -1   4  126.63    8.65
  -4  -1  -4  132.74    8.91
   4  -1   4  158.40    9.34
  -4  -1  -4  146.61    9.69
  -4  -1  -4  143.73    8.95
  -4   1  -4  141.64    9.72
   4   1   4  148.98    8.75
  -4   1  -4  149.56    8.89
  -4   1  -4  147.38    8.89
  -5  -1  -4   15.08    0.95
   5  -1   4   13.43    1.16
  -5  -1  -4   12.38    1.26
   5  -1   4   12.68    1.17
  -5  -1  -4   10.95    1.10
  -5  -1  -4    9.64    1.12
  -5   1  -4   12.85    1.30
  -5   1  -4   10.49    0.82
   5   1   4   12.62    1.16
   6  -1   4    1.65    0.49
  -6  -1  -4    2.77    0.61
   6  -1   4    0.91    0.39
  -6   1  -4    2.33    0.59
   6   1   4    1.57    0.48
  -7  -1  -4    8.51    1.28
   7  -1   4    8.31    1.15
   7  -1   4    9.85    1.27
   7   1   4   10.07    1.30
  -7   1  -4   10.49    1.43
   8  -1   4   33.34    2.69
  -8  -1  -4   32.70    2.89
   8  -1   4   36.85    2.70
   8   1   4   30.95    2.61
  -8   1  -4   32.38    2.91
  -9  -1  -4    0.95    0.54
   9  -1   4    1.01    0.55
   9   1   4    1.02    0.54
  -9   1  -4    0.48    0.46
  10  -1   4   10.49    1.58
 -10  -1  -4   11.54    1.71
 -10   1  -4   11.19    1.78
  10   1   4   13.13    1.68
 -11  -1  -4    4.01    1.12
  11  -1   4    4.17    0.96
  11   1   4    2.75    0.85
 -11   1  -4    2.27    0.97
  12  -1   4   -0.11    0.43
 -12  -1  -4   -0.57    0.40
  12   1   4    0.15    0.42
 -12   1  -4    0.14    0.63
  13  -2  -4    0.62    0.61
 -13   2   4   -0.48    0.55
  13   2  -4   -0.12    0.67
  12  -2  -4    0.01    0.40
 -12  -2   4   -0.06    0.35
  12   2  -4    0.54    0.61
 -12   2   4   -0.49    0.50
 -11  -2   4   20.29    1.82
  11  -2  -4   22.75    2.00
 -11  -2   4   19.04    2.23
  11   2  -4   18.45    2.14
 -11   2   4   15.89    1.90
  10  -2  -4   32.87    2.56
 -10  -2   4   28.90    2.76
 -10  -2   4   30.52    2.41
  10   2  -4   32.57    2.54
 -10   2   4   28.20    2.40
  -9  -2   4   38.41    2.74
   9  -2  -4   29.49    2.45
  -9  -2   4   27.38    2.38
   9   2  -4   28.03    2.43
  -9   2   4   30.10    2.44
  -9   2   4   36.34    2.63
  -8  -2   4    8.92    1.10
   8  -2  -4    9.86    1.21
  -8  -2   4   12.36    1.15
   8  -2  -4    7.78    0.72
  -8  -2   4    8.80    1.04
  -8   2   4    9.00    1.19
   8   2  -4    8.76    1.14
  -8   2   4    6.68    1.00
  -7  -2   4   86.95    5.99
   7  -2  -4   81.25    5.24
   7  -2  -4   84.06    5.32
  -7  -2   4   79.31    5.25
  -7  -2   4   82.24    5.46
   7  -2  -4   80.72    5.24
  -7   2   4   81.88    5.28
  -7   2   4   79.56    5.88
   7   2  -4   84.10    5.31
  -6  -2   4    3.61    0.56
  -6  -2   4    3.07    0.66
  -6  -2   4    3.08    0.55
  -6   2   4    3.44    0.59
   6   2  -4    3.11    0.56
  -5  -2   4   77.56    4.81
  -5  -2   4   71.97    5.46
  -5  -2   4   79.10    5.07
  -5   2   4   77.78    4.84
  -5   2   4   77.36    5.43
   5   2  -4   74.61    5.41
  -4  -2   4    2.14    0.38
  -4  -2   4    2.43    0.45
  -4  -2   4    1.38    0.32
  -4  -2   4    3.01    0.55
   4   2  -4    2.11    0.52
  -4   2   4    1.83    0.39
  -4   2   4    2.24    0.47
  -3  -2   4   -0.01    0.13
  -3  -2   4    0.40    0.23
  -3  -2   4   -0.05    0.14
  -3  -2   4    0.16    0.17
  -3   2   4    0.02    0.14
  -2  -2   4    3.00    0.39
  -2  -2   4    3.49    0.46
  -2  -2   4    2.99    0.45
  -2  -2   4    2.55    0.44
  -2   2   4    3.03    0.48
  -2   2   4    2.23    0.40
  -1  -2   4  103.69    6.21
  -1  -2   4  110.86    6.62
  -1  -2   4   97.27    7.03
  -1  -2   4  105.70    6.71
  -1   2   4   93.94    6.24
  -1   2   4  105.93    7.07
   0  -2   4   22.78    1.51
   0  -2   4   19.20    1.36
   0  -2   4   19.17    1.42
   0   2   4   22.07    1.57
   0   2   4   15.71    1.36
  -1  -2  -4    1.06    0.31
   1  -2   4    1.19    0.24
  -1  -2  -4    1.79    0.31
   1  -2   4    1.12    0.28
   1   2   4    0.94    0.28
   1   2   4    1.08    0.28
  -1   2  -4    1.03    0.36
  -2  -2  -4   92.97    6.19
   2  -2   4   91.52    5.69
   2  -2   4   86.99    5.50
   2  -2   4   88.14    5.89
  -2  -2  -4   93.27    5.76
   2   2   4   87.43    5.57
  -2   2  -4   83.43    6.21
   2   2   4   86.92    6.14
  -3  -2  -4   92.69    5.95
   3  -2   4   95.78    6.14
  -3  -2  -4  100.44    6.43
   3  -2   4   97.91    5.78
  -3  -2  -4   90.24    6.40
   3  -2   4   92.23    5.86
  -3   2  -4   93.19    5.88
  -3   2  -4   82.06    6.42
   3   2   4   91.39    5.81
   3   2   4   87.32    6.36
  -4  -2  -4   23.48    1.87
  -4  -2  -4   23.81    1.96
   4  -2   4   22.98    1.82
   4  -2   4   24.35    1.77
  -4  -2  -4   25.27    1.70
   4   2   4   19.82    1.77
  -4   2  -4   21.13    1.59
  -4   2  -4   26.96    2.01
   5  -2   4   62.29    4.12
  -5  -2  -4   62.85    4.20
  -5  -2  -4   60.87    3.85
  -5  -2  -4   55.10    4.29
   5  -2   4   57.58    3.88
  -5  -2  -4   58.89    4.05
  -5   2  -4   54.37    4.35
   5   2   4   52.10    3.89
  -6  -2  -4    7.93    1.14
   6  -2   4    7.92    1.03
   6  -2   4   10.82    1.23
  -6  -2  -4    9.65    1.06
  -6   2  -4    8.32    1.22
   6   2   4    8.66    1.14
   7  -2   4    3.54    0.74
  -7  -2  -4    3.84    0.82
   7  -2   4    4.11    0.74
   7   2   4    3.00    0.69
  -7   2  -4    3.03    0.77
   8  -2   4   54.47    3.92
   8  -2   4   48.21    3.72
  -8  -2  -4   51.20    4.14
   8   2   4   50.65    3.78
  -8   2  -4   58.05    4.32
  -9  -2  -4   32.31    2.74
   9  -2   4   31.40    2.49
   9  -2   4   27.56    2.46
  -9   2  -4   29.63    2.79
   9   2   4   26.47    2.47
 -10  -2  -4   -0.28    0.36
  10  -2   4   -0.26    0.31
  10   2   4    0.24    0.49
 -10   2  -4    0.45    0.49
 -11  -2  -4    1.63    0.81
  11  -2   4    0.60    0.67
  11   2   4    1.24    0.71
 -11   2  -4    2.41    0.95
  12  -2   4   24.27    2.64
 -12  -2  -4   26.45    3.07
 -12   2  -4   21.48    2.89
  12   2   4   21.00    2.63
  13  -3  -4   16.16    2.07
 -13   3   4   16.31    2.00
  13   3  -4   16.68    2.19
  12  -3  -4   -0.05    0.44
 -12  -3   4    0.35    0.41
 -12   3   4    0.08    0.42
  12   3  -4    1.44    0.75
 -11  -3   4    0.88    0.48
  11  -3  -4    0.92    0.57
 -11   3   4    1.00    0.54
  11   3  -4    0.24    0.49
 -10  -3   4   16.22    1.51
  10  -3  -4   16.22    1.84
 -10  -3   4   15.38    1.90
  10   3  -4   14.20    1.69
 -10   3   4   14.92    1.71
   9  -3  -4   53.82    3.82
  -9  -3   4   59.42    4.31
  -9  -3   4   54.86    3.75
   9  -3  -4   55.59    3.63
   9   3  -4   57.81    3.87
  -9   3   4   45.90    4.07
  -9   3   4   53.15    3.79
   8  -3  -4   -0.23    0.22
  -8  -3   4    0.05    0.27
  -8  -3   4    0.31    0.31
   8  -3  -4   -0.11    0.21
   8   3  -4    0.64    0.33
  -8   3   4    0.59    0.34
  -8   3   4    0.63    0.47
  -7  -3   4   30.64    2.39
   7  -3  -4   34.28    2.44
  -7  -3   4   37.47    2.62
  -7  -3   4   31.98    2.36
   7   3  -4   32.30    2.39
  -7   3   4   31.04    2.37
  -7   3   4   31.44    2.61
  -6  -3   4   25.06    2.02
  -6  -3   4   28.80    1.97
  -6  -3   4   25.84    2.26
   6   3  -4   25.23    1.97
  -6   3   4   23.91    1.96
  -6   3   4   30.04    2.22
   6   3  -4   30.02    2.30
  -5  -3   4   42.92    2.79
  -5  -3   4   44.62    2.98
  -5  -3   4   39.08    2.90
  -5  -3   4   43.19    3.20
   5   3  -4   42.32    3.20
  -5   3   4   40.52    2.82
  -5   3   4   42.43    3.17
  -4  -3   4    2.56    0.48
  -4  -3   4    3.09    0.62
  -4  -3   4    3.43    0.48
  -4  -3   4    4.35    0.55
   4   3  -4    2.70    0.60
  -4   3   4    2.47    0.44
  -3  -3   4   92.30    6.24
  -3  -3   4   86.49    5.82
  -3  -3   4   90.69    5.86
  -3  -3   4   93.52    5.45
  -3   3   4   84.86    6.21
  -3   3   4   86.89    5.49
  -2  -3   4   69.67    4.55
  -2  -3   4   70.97    4.81
   2  -3  -4   70.22    4.53
  -2  -3   4   61.05    4.16
  -2  -3   4   74.61    4.53
  -2   3   4   63.07    4.80
  -2   3   4   69.62    4.26
   1  -3  -4    8.29    0.76
  -1  -3   4    7.34    0.74
  -1  -3   4    9.41    0.78
  -1  -3   4    7.99    0.74
  -1   3   4    7.45    0.78
  -1   3   4    7.67    0.70
   0  -3  -4   70.87    4.72
   0  -3  -4   68.38    4.42
   0  -3   4   62.64    4.44
   0  -3   4   68.94    4.37
   0   3   4   67.50    4.18
   0   3   4   60.96    4.67
   1  -3   4   27.93    1.90
   1  -3   4   22.59    1.80
  -1  -3  -4   27.36    1.96
  -1  -3  -4   28.31    2.15
   1  -3   4   29.46    1.99
   1   3   4   27.84    2.10
   1   3   4   28.49    1.93
   2  -3   4    1.06    0.26
   2  -3   4    2.28    0.41
  -2  -3  -4    1.80    0.37
  -2  -3  -4    1.59    0.42
   2   3   4    1.39    0.41
  -2   3  -4    0.11    0.32
   2   3   4    0.84    0.30
  -2   3  -4    1.97    0.53
   3  -3   4  161.57   10.21
  -3  -3  -4  161.15   10.74
  -3  -3  -4  167.19   10.59
  -3  -3  -4  165.37   10.00
   3  -3   4  159.29    9.52
   3  -3   4  154.75    9.87
   3   3   4  157.61    9.60
  -3   3  -4  138.61    9.89
   3   3   4  159.51   10.71
  -3   3  -4  145.59   10.65
  -4  -3  -4    3.29    0.63
  -4  -3  -4    3.31    0.51
   4  -3   4    3.52    0.59
   4  -3   4    4.15    0.38
  -4  -3  -4    3.91    0.67
   4  -3   4    4.15    0.60
  -4   3  -4    3.64    0.49
   4   3   4    4.00    0.71
  -4   3  -4    4.07    0.52
  -4   3  -4    2.82    0.73
   5  -3   4   13.68    1.17
  -5  -3  -4   12.83    1.04
   5  -3   4   11.89    1.14
  -5  -3  -4   10.85    1.21
  -5  -3  -4   12.43    1.26
  -5  -3  -4   12.38    1.20
  -5   3  -4   11.08    1.49
   5   3   4   13.41    1.46
  -6  -3  -4    0.14    0.24
   6  -3   4   -0.02    0.20
  -6  -3  -4    0.32    0.41
   6  -3   4    0.15    0.30
  -6   3  -4    0.14    0.36
   6   3   4    0.30    0.33
   7  -3   4   97.62    6.14
  -7  -3  -4  101.54    6.81
   7  -3   4   87.83    6.42
  -7   3  -4   89.18    6.82
   7   3   4   94.81    6.18
   8  -3   4    4.36    0.82
  -8  -3  -4    5.55    1.02
   8  -3   4    7.37    1.08
  -8   3  -4    5.18    1.12
   8   3   4    3.64    0.85
   9  -3   4    2.81    0.68
   9  -3   4    3.16    0.77
  -9  -3  -4    4.39    0.91
   9   3   4    2.21    0.73
  -9   3  -4    2.60    0.81
  10  -3   4   -0.17    0.40
 -10  -3  -4   -0.01    0.46
  10  -3   4   -0.23    0.31
 -10   3  -4   -0.11    0.42
  10   3   4   -0.20    0.49
 -11  -3  -4   28.37    2.73
  11  -3   4   23.76    2.63
 -11   3  -4   29.89    2.90
  11   3   4   22.45    2.62
 -12  -3  -4    0.32    0.69
  12  -3   4    0.48    0.60
  12   3   4   -0.45    0.56
 -12   3  -4   -0.06    0.56
  13  -4  -4    0.01    0.46
  13   4  -4   -0.30    0.69
 -13   4   4   -0.66    0.56
  12  -4  -4    1.03    0.56
 -12  -4   4    1.65    0.67
 -12   4   4    1.18    0.68
  12   4  -4    1.71    0.78
 -11  -4   4   20.17    1.91
 -11  -4   4   21.73    2.24
  11  -4  -4   22.60    2.09
  11  -4  -4   23.31    1.78
 -11   4   4   23.04    2.05
  11   4  -4   21.45    2.33
  10  -4  -4    0.67    0.41
  10  -4  -4   -0.07    0.16
 -10  -4   4    0.16    0.30
  10   4  -4    0.73    0.46
 -10   4   4    0.07    0.33
   9  -4  -4   20.42    1.78
  -9  -4   4   18.94    1.65
  -9  -4   4   19.27    1.67
  -9  -4   4   22.33    1.96
   9   4  -4   21.20    1.79
  -9   4   4   16.99    1.66
  -9   4   4   16.58    1.81
   8  -4  -4    9.50    1.16
  -8  -4   4    8.03    1.02
  -8  -4   4    7.46    1.22
  -8  -4   4    9.50    1.12
  -8   4   4    7.90    1.09
   8   4  -4    7.76    1.07
  -7  -4   4   42.57    3.04
  -7  -4   4   46.18    3.21
  -7  -4   4   55.38    3.49
   7  -4  -4   41.26    3.09
   7  -4  -4   46.75    3.16
  -7   4   4   40.01    3.06
  -7   4   4   42.01    3.39
   7   4  -4   43.14    3.08
  -6  -4   4    2.87    0.55
  -6  -4   4    2.29    0.47
  -6  -4   4    1.66    0.50
   6  -4  -4    2.55    0.48
   6   4  -4    2.93    0.56
  -6   4   4    1.62    0.42
   6   4  -4    2.88    0.67
  -6   4   4    1.78    0.52
  -5  -4   4  170.31   11.87
  -5  -4   4  179.10   10.39
   5  -4  -4  179.88   11.03
  -5  -4   4  145.25   11.09
  -5  -4   4  182.32   11.07
  -5   4   4  171.96   11.79
   5   4  -4  172.34   11.63
  -5   4   4  177.06   10.45
   5   4  -4  173.67   10.41
  -4  -4   4    9.32    0.80
  -4  -4   4    8.52    1.08
  -4  -4   4    7.63    0.89
  -4  -4   4    9.03    1.00
   4  -4  -4    8.78    0.86
  -4   4   4   10.91    0.94
  -4   4   4    8.66    0.82
   4   4  -4   10.15    1.01
  -3  -4   4   11.19    0.89
  -3  -4   4   10.70    1.02
   3  -4  -4   12.36    1.05
  -3  -4   4   12.40    1.13
  -3  -4   4   10.33    1.01
  -3   4   4   11.60    1.13
  -3   4   4   13.29    0.99
  -2  -4   4   44.65    3.21
  -2  -4   4   45.31    3.01
  -2  -4   4   44.24    3.02
   2  -4  -4   42.38    3.01
  -2   4   4   40.74    2.80
  -2   4   4   43.59    3.20
   1  -4  -4  353.30   22.82
   1  -4  -4  349.94   21.33
  -1  -4   4  354.47   21.30
  -1  -4   4  324.80   22.72
  -1   4   4  363.55   20.09
  -1   4   4  289.44   22.74
   0  -4  -4   29.99    2.27
   0  -4   4   27.82    2.05
   0  -4   4   25.69    2.12
   0  -4   4   29.57    2.05
   0  -4  -4   30.66    2.11
   0   4   4   29.90    2.01
   0   4   4   31.15    2.27
  -1  -4  -4  130.38    8.40
   1  -4   4  126.95    8.32
   1  -4   4  129.15    8.48
   1  -4   4  128.05    7.84
  -1  -4  -4  133.84    9.02
   1   4   4  129.53    7.96
   1   4   4  136.19    8.99
   2  -4   4   20.62    1.47
  -2  -4  -4   21.50    1.72
   2  -4   4   19.40    1.54
  -2  -4  -4   20.11    1.56
   2  -4   4   21.65    1.48
   2   4   4   20.67    1.68
   2   4   4   17.28    1.51
  -2   4  -4   19.54    1.77
  -3  -4  -4  204.76   15.93
  -3  -4  -4  244.97   14.89
   3  -4   4  238.70   14.77
  -3  -4  -4  246.70   15.71
   3  -4   4  246.39   15.14
   3  -4   4  248.06   14.09
  -3   4  -4  226.26   15.77
   3   4   4  228.56   14.17
   3   4   4  231.84   15.95
  -4  -4  -4   12.72    1.18
   4  -4   4   12.23    0.91
  -4  -4  -4   13.11    1.28
   4  -4   4   10.26    1.03
  -4  -4  -4   13.12    1.06
   4  -4   4   11.47    1.08
  -4   4  -4   11.95    1.08
   4   4   4   10.33    1.22
   5  -4   4   46.43    3.31
  -5  -4  -4   53.19    3.24
  -5  -4  -4   44.57    3.32
  -5  -4  -4   42.57    3.49
   5  -4   4   41.53    3.11
  -5  -4  -4   49.06    3.51
   5   4   4   49.59    3.34
  -5   4  -4   44.35    3.62
  -6  -4  -4    4.76    0.79
   6  -4   4    2.60    0.57
   6  -4   4    2.53    0.55
   6   4   4    5.25    0.89
  -6   4  -4    3.19    0.79
  -7  -4  -4    7.59    1.12
  -7  -4  -4    9.44    1.26
   7  -4   4    8.41    1.13
   7  -4   4    9.02    1.11
  -7   4  -4    4.77    1.26
   7   4   4    8.19    1.23
   8  -4   4    1.60    0.53
  -8  -4  -4    1.54    0.57
   8  -4   4    0.95    0.40
   8   4   4   -0.48    0.36
  -8   4  -4    0.06    0.41
   9  -4   4   25.98    2.28
   9  -4   4   25.77    2.23
  -9  -4  -4   27.98    2.46
   9   4   4   26.40    2.33
  -9   4  -4   24.07    2.57
  10  -4   4    0.51    0.42
 -10  -4  -4    1.53    0.72
  10  -4   4    2.62    0.77
 -10   4  -4    2.42    0.86
  10   4   4    1.19    0.66
  11  -4   4    0.49    0.59
 -11  -4  -4    2.53    0.95
 -11   4  -4    0.57    0.74
  11   4   4    1.36    0.77
  13  -5  -4    4.56    1.08
 -13   5   4    4.96    1.14
  13   5  -4    3.49    1.10
  12  -5  -4   14.19    1.88
  12  -5  -4   16.41    1.41
 -12  -5   4   13.17    2.00
  12   5  -4   16.24    2.02
 -12   5   4   14.42    1.88
 -11  -5   4    0.95    0.61
  11  -5  -4    2.56    0.78
  11  -5  -4    1.18    0.34
  11   5  -4    1.18    0.60
 -11   5   4    2.05    0.64
 -10  -5   4    5.76    1.06
  10  -5  -4    6.93    1.10
 -10  -5   4    3.83    0.81
 -10   5   4    5.16    0.94
  10   5  -4    5.03    0.96
  -9  -5   4   16.07    1.45
  -9  -5   4   16.52    1.51
   9  -5  -4   15.66    1.73
  -9   5   4   15.02    1.68
   9   5  -4   15.58    1.74
   8  -5  -4   19.06    1.66
  -8  -5   4   22.94    1.92
  -8  -5   4   20.17    1.60
  -8  -5   4   21.68    1.70
   8   5  -4   17.36    1.85
  -8   5   4   16.63    1.72
  -8   5   4   17.83    1.63
   8   5  -4   14.88    1.56
  -7  -5   4    8.84    1.08
   7  -5  -4   10.13    1.04
  -7  -5   4   11.75    1.16
   7  -5  -4   12.89    1.17
  -7  -5   4   11.72    1.47
  -7   5   4    9.88    1.20
   7   5  -4   13.93    1.36
  -7   5   4   11.61    1.24
   7   5  -4   13.42    1.52
   6  -5  -4   26.38    1.96
  -6  -5   4   22.38    1.83
  -6  -5   4   23.27    1.98
   6   5  -4   25.65    2.19
  -6   5   4   28.33    2.16
  -6   5   4   26.82    1.94
   6   5  -4   25.77    1.90
  -5  -5   4    7.82    0.85
   5  -5  -4    8.86    0.86
  -5  -5   4    7.32    0.91
  -5  -5   4    4.65    0.92
  -5  -5   4    8.01    0.97
  -5   5   4   10.15    0.97
   5   5  -4    8.69    1.10
  -5   5   4    7.99    0.93
   5   5  -4    9.08    0.83
  -4  -5   4   -0.01    0.20
  -4  -5   4    0.13    0.30
   4  -5  -4    0.10    0.20
  -4  -5   4   -0.06    0.14
  -4  -5   4   -0.05    0.17
  -4   5   4    0.13    0.24
  -4   5   4   -0.09    0.18
   4   5  -4   -0.06    0.34
   4   5  -4    0.03    0.16
  -3  -5   4  108.93    6.68
  -3  -5   4  101.43    7.07
  -3  -5   4   94.80    6.59
  -3  -5   4   99.76    6.09
   3  -5  -4   99.57    6.59
  -3   5   4   99.96    7.05
  -3   5   4  100.43    6.19
   2  -5  -4   25.13    2.10
  -2  -5   4   22.84    1.93
  -2  -5   4   26.55    2.09
  -2  -5   4   28.68    1.99
   2  -5  -4   25.65    1.95
  -2   5   4   25.30    1.82
  -2   5   4   30.93    2.09
  -1  -5   4   20.82    1.52
   1  -5  -4   18.25    1.51
  -1  -5   4   18.90    1.48
  -1  -5   4   20.11    1.58
   1  -5  -4   20.32    1.66
  -1   5   4   17.67    1.39
  -1   5   4   19.10    1.64
   0  -5   4    6.33    0.67
   0  -5  -4    6.56    0.81
   0  -5   4    7.21    0.63
   0  -5   4    5.05    0.67
   0  -5  -4    8.27    0.98
   0   5   4    6.71    0.85
   0   5   4    6.01    0.72
  -1  -5  -4   65.85    4.45
   1  -5   4   66.68    4.38
  -1  -5  -4   68.77    4.81
   1  -5   4   67.40    4.61
   1  -5   4   68.92    4.45
   1   5   4   61.87    4.74
  -1   5  -4   64.13    4.75
   1   5   4   64.98    4.22
   2  -5   4   17.16    1.30
  -2  -5  -4   16.59    1.54
   2  -5   4   16.95    1.25
  -2  -5  -4   19.28    1.42
   2  -5   4   16.75    1.35
  -2   5  -4   14.70    1.55
   2   5   4   18.09    1.40
   2   5   4   16.30    1.50
  -3  -5  -4   45.00    3.64
   3  -5   4   47.20    3.16
   3  -5   4   53.09    3.41
   3  -5   4   47.59    3.24
  -3  -5  -4   49.31    3.37
   3   5   4   49.18    3.31
  -3   5  -4   49.63    3.71
   3   5   4   48.78    3.65
  -4  -5  -4   26.59    1.95
   4  -5   4   24.58    1.78
  -4  -5  -4   25.43    2.03
  -4  -5  -4   24.07    2.11
   4  -5   4   26.52    1.96
   4  -5   4   25.02    1.86
  -4   5  -4   26.74    2.28
   4   5   4   26.00    2.01
  -5  -5  -4    9.42    0.97
  -5  -5  -4   11.01    1.06
   5  -5   4    9.84    1.00
  -5  -5  -4   11.36    1.31
   5  -5   4   10.67    1.17
  -5  -5  -4   10.80    1.09
  -5   5  -4   11.03    1.47
   5   5   4   12.10    1.35
   6  -5   4   35.75    2.82
  -6  -5  -4   40.23    3.10
  -6  -5  -4   40.18    3.02
   6  -5   4   35.14    2.70
  -6  -5  -4   37.37    2.91
   6   5   4   38.96    2.90
  -6   5  -4   40.15    3.22
  -7  -5  -4   29.62    2.95
   7  -5   4   35.90    2.79
   7  -5   4   35.04    2.71
  -7  -5  -4   39.03    2.99
  -7   5  -4   46.27    3.22
   7   5   4   37.89    2.89
  -8  -5  -4    4.79    0.93
   8  -5   4    3.45    0.72
   8  -5   4    6.69    1.01
  -8   5  -4    4.04    1.04
   8   5   4    4.20    0.98
   9  -5   4   11.27    1.40
   9  -5   4    8.61    1.29
  -9  -5  -4   11.12    1.55
   9   5   4    6.58    1.32
  -9   5  -4   11.27    1.78
  10  -5   4   17.92    2.04
 -10  -5  -4   20.08    2.03
 -10   5  -4   16.93    2.37
  10   5   4   17.39    2.15
  11  -5   4    8.73    1.39
 -11   5  -4    6.74    1.46
  11   5   4    8.71    1.54
 -13   6   4    0.53    0.74
  12  -6  -4   15.16    1.35
 -12  -6   4   16.05    2.13
  12  -6  -4   16.64    2.02
 -12   6   4   14.51    1.86
  12   6  -4   13.59    1.91
  11  -6  -4    6.14    1.09
 -11  -6   4    4.48    1.02
 -11   6   4    5.46    1.09
  11   6  -4    5.82    1.13
 -10  -6   4   14.29    1.82
  10  -6  -4   13.42    1.61
 -10  -6   4   12.06    1.44
 -10   6   4   11.00    1.47
  10   6  -4   13.68    1.65
  10   6  -4   12.54    1.78
  -9  -6   4   24.28    2.04
  -9  -6   4   23.72    2.49
   9  -6  -4   30.16    2.25
  -9  -6   4   24.26    2.17
  -9   6   4   29.28    2.23
   9   6  -4   27.49    2.22
   9   6  -4   27.61    2.53
   8  -6  -4  111.64    7.09
  -8  -6   4  109.36    6.95
  -8  -6   4  112.83    7.41
  -8  -6   4  113.93    8.06
   8   6  -4  115.05    7.90
   8   6  -4  122.27    7.11
  -8   6   4  112.07    7.07
  -8   6   4   91.89    7.76
  -7  -6   4    8.80    0.99
  -7  -6   4    8.65    1.10
   7  -6  -4    8.38    0.98
  -7  -6   4    6.70    1.22
   7  -6  -4    6.96    0.98
   7   6  -4   10.41    1.33
  -7   6   4    7.46    1.07
   7   6  -4    7.62    0.99
  -7   6   4    7.11    1.01
  -6  -6   4    0.36    0.30
  -6  -6   4   -0.04    0.19
   6  -6  -4    0.07    0.20
  -6   6   4    0.33    0.27
  -6   6   4   -0.09    0.37
   6   6  -4    0.50    0.49
   6   6  -4   -0.38    0.21
  -5  -6   4   45.39    3.40
  -5  -6   4   44.24    3.67
  -5  -6   4   46.87    3.11
   5  -6  -4   45.99    3.34
  -5  -6   4   43.76    3.40
   5   6  -4   56.47    3.65
   5   6  -4   49.09    3.15
  -5   6   4   48.09    3.62
  -5   6   4   51.69    3.22
   4  -6  -4  152.31   10.88
  -4  -6   4  154.82   10.94
  -4  -6   4  147.08   10.19
   4  -6  -4  161.38   10.19
  -4  -6   4  164.17   10.32
  -4  -6   4  164.44    9.48
  -4   6   4  162.55    9.58
  -4   6   4  154.44   10.87
   3  -6  -4    7.75    0.78
  -3  -6   4    7.36    0.87
  -3  -6   4    6.78    0.90
  -3  -6   4    6.29    0.58
   3  -6  -4    6.19    0.89
   3  -6  -4    5.85    0.79
  -3   6   4    7.49    0.81
   2  -6  -4   15.21    1.36
  -2  -6   4   17.71    1.48
  -2  -6   4   17.38    1.37
   2  -6  -4   16.96    1.49
  -2  -6   4   17.24    1.39
  -2   6   4   14.16    1.44
  -2   6   4   17.15    1.27
   1  -6  -4   78.34    5.22
   1  -6  -4   77.34    5.61
  -1  -6   4   76.63    5.21
  -1  -6   4   81.84    5.20
  -1   6   4   81.10    4.88
  -1   6   4   73.09    5.57
   0  -6   4   24.89    1.96
   0  -6   4   30.43    2.10
   0  -6  -4   22.90    2.15
   0  -6  -4   25.57    2.01
   0  -6   4   28.84    2.00
   0   6  -4   25.33    2.20
   0   6   4   28.35    2.19
   0   6   4   27.38    1.89
   1  -6   4    1.31    0.31
  -1  -6  -4    1.50    0.38
   1  -6   4    1.32    0.32
   1  -6   4    1.10    0.31
   1   6   4    1.69    0.44
   1   6   4    0.75    0.31
  -1   6  -4    0.71    0.45
  -2  -6  -4  131.01    8.87
   2  -6   4  114.31    7.60
  -2  -6  -4  124.44    8.21
   2  -6   4  135.07    8.60
   2  -6   4  126.15    8.11
   2  -6   4  125.17    8.26
  -2   6  -4  122.49    8.67
   2   6   4  136.68    7.83
   2   6   4  122.27    8.81
  -3  -6  -4   39.69    2.79
   3  -6   4   31.85    2.41
   3  -6   4   32.26    2.50
  -3  -6  -4   37.51    2.58
   3  -6   4   33.70    2.34
   3   6   4   33.26    2.49
  -3   6  -4   38.58    2.77
  -4  -6  -4    0.60    0.34
  -4  -6  -4    0.84    0.32
   4  -6   4    0.44    0.28
   4  -6   4    0.66    0.25
  -4  -6  -4    0.22    0.23
   4  -6   4    0.33    0.19
  -4   6  -4    0.62    0.44
   4   6   4    0.48    0.34
  -5  -6  -4    8.80    1.16
   5  -6   4   11.06    1.18
  -5  -6  -4   10.05    1.04
  -5  -6  -4   11.47    1.44
  -5  -6  -4   11.81    1.15
   5  -6   4   12.31    1.11
  -5   6  -4   15.73    1.33
   5   6   4   11.57    1.35
  -6  -6  -4   46.33    3.00
   6  -6   4   35.79    2.60
  -6  -6  -4   34.43    2.66
  -6  -6  -4   32.97    2.72
   6  -6   4   35.16    2.70
  -6  -6  -4   34.98    2.99
  -6   6  -4   31.47    2.99
   6   6   4   38.95    2.84
   7  -6   4   12.76    1.24
   7  -6   4   13.03    1.43
  -7   6  -4    8.63    1.58
   7   6   4   14.37    1.64
  -8  -6  -4   26.20    2.47
   8  -6   4   23.47    2.09
   8  -6   4   26.86    2.13
  -8   6  -4   21.89    2.72
   8   6   4   24.36    2.56
   9  -6   4    2.58    0.66
   9  -6   4    3.58    0.85
   9   6   4    1.37    0.70
  -9   6  -4    2.49    0.84
  10  -6   4    7.73    1.23
 -10   6  -4    5.69    1.30
  10   6   4    4.54    1.16
  11  -6   4    2.29    0.80
 -11   6  -4    0.68    0.79
  11   6   4   -0.25    0.75
 -12  -7   4   34.81    3.13
  12  -7  -4   31.95    2.81
  12   7  -4   32.61    2.86
 -12   7   4   28.48    2.72
  11  -7  -4    1.74    0.63
 -11  -7   4    1.82    0.83
 -11   7   4    1.45    0.68
  11   7  -4    1.61    0.68
 -10  -7   4   33.95    3.05
  10  -7  -4   36.73    2.75
 -10   7   4   33.22    2.66
  10   7  -4   29.05    2.60
  -9  -7   4    0.58    0.45
   9  -7  -4    0.71    0.44
  -9  -7   4    0.47    0.44
  -9   7   4    0.18    0.42
   9   7  -4   -0.23    0.34
  -8  -7   4    4.95    0.86
  -8  -7   4    5.95    1.23
   8  -7  -4    5.25    0.90
  -8  -7   4    5.09    0.78
   8   7  -4    6.42    1.13
   8   7  -4    5.53    0.91
  -8   7   4    6.27    0.97
  -7  -7   4    8.35    1.24
  -7  -7   4    8.13    0.95
   7  -7  -4    8.15    1.04
  -7  -7   4    7.90    1.08
   7  -7  -4    8.00    0.98
   7   7  -4    6.72    1.13
   7   7  -4    5.09    0.86
  -7   7   4    8.20    1.03
  -6  -7   4   51.17    3.48
  -6  -7   4   57.25    3.89
   6  -7  -4   52.29    3.75
   6  -7  -4   58.78    4.09
  -6  -7   4   48.92    4.16
   6   7  -4   55.75    3.58
  -6   7   4   55.63    4.08
  -6   7   4   53.40    3.61
   6   7  -4   50.18    3.99
   5  -7  -4    1.11    0.41
  -5  -7   4    1.31    0.47
  -5  -7   4    0.76    0.37
   5  -7  -4    0.38    0.25
  -5  -7   4    0.36    0.22
  -5  -7   4    0.68    0.35
  -5   7   4    1.02    0.48
  -5   7   4    0.82    0.32
   5   7  -4    0.73    0.48
   5   7  -4   -0.09    0.19
  -4  -7   4    1.72    0.45
  -4  -7   4    0.72    0.23
   4  -7  -4    0.56    0.30
  -4  -7   4    1.64    0.45
   4  -7  -4    0.90    0.37
   4  -7  -4    0.59    0.31
  -4  -7   4    0.14    0.28
   4   7  -4    0.97    0.45
   4   7  -4    0.11    0.19
  -4   7   4    1.00    0.33
   3  -7  -4   43.93    3.40
   3  -7  -4   40.02    3.14
  -3  -7   4   37.85    3.14
  -3  -7   4   54.94    3.22
   3  -7  -4   45.34    3.25
  -3  -7   4   41.72    3.39
  -3   7   4   44.80    2.94
   3   7  -4   44.52    2.82
  -3   7   4   47.72    3.36
   2  -7  -4   73.89    5.33
  -2  -7   4   73.28    4.96
  -2  -7   4   74.97    4.95
  -2  -7   4   70.30    5.25
   2  -7  -4   71.32    4.94
  -2   7   4   68.07    5.28
  -2   7   4   79.72    4.62
  -1  -7   4    9.18    0.91
   1  -7  -4    7.97    1.00
  -1  -7   4    8.40    1.01
   1  -7  -4    7.30    1.02
  -1  -7   4    7.53    0.90
  -1   7   4    8.33    0.79
  -1   7   4   11.33    0.95
   0  -7   4   80.55    5.12
   0  -7  -4   75.42    5.53
   0  -7  -4   75.89    5.15
   0  -7   4   78.01    5.39
   0  -7   4   77.06    5.13
   0   7   4   82.81    4.82
   0   7  -4   63.06    5.33
   0   7   4   76.94    5.53
  -1  -7  -4   29.83    2.56
   1  -7   4   33.01    2.32
   1  -7   4   31.46    2.37
   1  -7   4   33.47    2.32
  -1  -7  -4   30.63    2.36
   1   7   4   33.38    2.59
  -1   7  -4   26.81    2.47
   1   7   4   33.76    2.23
  -2  -7  -4    2.20    0.57
  -2  -7  -4    2.22    0.51
   2  -7   4    1.70    0.38
   2  -7   4    1.54    0.34
   2  -7   4    1.62    0.36
  -2   7  -4    1.93    0.61
   2   7   4    1.99    0.53
   2   7   4    1.50    0.41
   3  -7   4    4.09    0.59
  -3  -7  -4    2.85    0.58
   3  -7   4    3.72    0.54
   3   7   4    3.81    0.66
  -3   7  -4    3.85    0.81
  -4  -7  -4   61.38    4.88
   4  -7   4   65.78    4.48
  -4  -7  -4   71.15    4.57
   4  -7   4   62.62    4.32
  -4  -7  -4   63.61    4.51
   4   7   4   67.51    4.40
  -4   7  -4   65.44    4.87
  -5  -7  -4    6.79    0.91
   5  -7   4    7.37    0.91
  -5  -7  -4    6.17    0.87
  -5   7  -4    6.06    1.09
   5   7   4    7.50    1.04
  -6  -7  -4   13.49    1.34
   6  -7   4   13.18    1.27
  -6  -7  -4   13.09    1.51
   6  -7   4   15.53    1.35
   6   7   4   16.97    1.77
   7  -7   4    4.74    0.76
   7  -7   4    2.51    0.57
  -7  -7  -4    3.76    0.94
  -7   7  -4    4.37    1.09
   7   7   4    4.03    0.94
   8  -7   4   18.20    1.66
  -8  -7  -4   13.53    1.96
   8  -7   4   15.51    1.61
   8   7   4   16.87    2.03
  -8   7  -4   26.05    2.03
   9  -7   4    6.64    1.08
  -9   7  -4    9.64    1.58
   9   7   4    5.40    1.36
  10   7   4   56.54    4.37
 -10   7  -4   54.89    4.76
  11   7   4    1.52    0.92
 -11   7  -4    2.09    0.93
  12  -8  -4    2.86    0.94
 -12  -8   4    4.40    1.17
  12   8  -4    1.39    0.91
 -12   8   4    2.35    0.91
 -11  -8   4    8.62    1.47
  11  -8  -4    6.93    1.22
 -11   8   4    4.15    1.05
  11   8  -4    3.15    0.95
 -10  -8   4   11.84    1.81
  10  -8  -4   11.76    1.59
  10   8  -4    9.45    1.43
 -10   8   4   12.99    1.58
  -9  -8   4   -0.04    0.35
  -9  -8   4   -0.06    0.36
   9  -8  -4    0.42    0.42
   9   8  -4   -0.13    0.34
  -9   8   4    0.13    0.40
  -8  -8   4   68.15    5.08
   8  -8  -4   66.44    4.39
  -8  -8   4   66.81    4.64
  -8   8   4   65.71    4.37
   8   8  -4   54.06    4.25
   7  -8  -4    8.20    1.11
  -7  -8   4    6.66    1.03
   7  -8  -4    5.49    0.89
   7  -8  -4    6.82    0.97
  -7   8   4    7.03    0.97
  -7   8   4    6.40    1.06
   6  -8  -4    0.64    0.33
   6  -8  -4    1.17    0.42
  -6  -8   4    0.25    0.38
  -6  -8   4    0.54    0.38
  -6   8   4    0.49    0.28
  -6   8   4    0.94    0.50
  -5  -8   4    1.69    0.57
   5  -8  -4    3.08    0.60
  -5  -8   4    2.66    0.59
   5  -8  -4    3.60    0.68
  -5  -8   4    3.32    0.62
  -5   8   4    2.22    0.62
  -5   8   4    3.44    0.58
  -4  -8   4   40.65    2.78
  -4  -8   4   37.05    2.77
   4  -8  -4   40.31    2.82
   4  -8  -4   36.97    2.74
  -4  -8   4   35.88    2.96
   4  -8  -4   37.87    2.93
  -4   8   4   37.86    2.53
  -4   8   4   27.12    2.83
  -3  -8   4    0.25    0.24
  -3  -8   4    0.41    0.29
   3  -8  -4    0.66    0.33
  -3  -8   4    0.27    0.28
   3  -8  -4    0.51    0.30
   3  -8  -4    0.22    0.29
  -3   8   4    0.35    0.24
  -3   8   4    0.45    0.33
  -2  -8   4   31.38    2.74
   2  -8  -4   40.89    3.04
  -2  -8   4   37.86    2.76
   2  -8  -4   39.58    2.82
  -2  -8   4   39.28    2.98
  -2   8   4   39.58    2.55
  -2   8   4   36.72    2.99
  -1  -8   4    8.82    1.05
  -1  -8   4    8.21    1.01
   1  -8  -4    5.98    0.88
   1  -8  -4    7.62    1.07
  -1  -8   4    7.82    0.91
  -1   8   4    9.03    0.94
  -1   8   4    8.93    0.90
   0  -8  -4   23.92    2.08
   0  -8   4   25.18    1.96
   0  -8   4   22.83    1.86
   0  -8   4   22.96    1.82
   0  -8  -4   24.10    1.92
   0   8  -4   21.95    2.00
   0   8   4   23.36    2.07
   0   8   4   25.07    1.74
   1  -8   4    5.42    0.76
  -1  -8  -4    4.59    0.89
   1  -8   4    6.26    0.78
  -1  -8  -4    5.96    0.86
   1  -8   4    5.01    0.69
   1   8   4    6.36    0.78
   1   8   4    5.61    0.92
  -1   8  -4    6.01    0.91
   2  -8   4   76.54    5.36
   2  -8   4   72.86    5.07
  -2  -8  -4   73.81    5.15
   2  -8   4   71.62    5.02
  -2  -8  -4   77.50    5.52
  -2   8  -4   76.48    5.42
   2   8   4   77.85    4.86
  -3  -8  -4    3.23    0.76
   3  -8   4    3.43    0.57
   3  -8   4    2.15    0.44
  -3  -8  -4    2.77    0.62
   3   8   4    3.33    0.62
  -3   8  -4    2.91    0.73
  -4  -8  -4    1.37    0.46
  -4  -8  -4    1.46    0.42
   4  -8   4    1.24    0.36
   4   8   4    1.24    0.45
  -4   8  -4    1.74    0.64
   5  -8   4    7.83    0.98
  -5  -8  -4    9.66    1.17
  -5  -8  -4   10.12    1.22
   5   8   4    9.69    1.22
  -5   8  -4    8.25    1.31
  -6  -8  -4   64.60    4.81
  -6  -8  -4   51.58    4.38
   6  -8   4   64.33    4.43
  -6  -8  -4   63.29    4.42
   6   8   4   71.65    4.46
  -6   8  -4   61.96    4.85
  -7  -8  -4    3.04    0.90
   7  -8   4    2.19    0.60
  -7   8  -4    2.91    0.94
   7   8   4    2.75    0.72
  -8  -8  -4   25.33    2.40
   8  -8   4   22.26    2.08
   8   8   4   25.49    2.27
  -9   8  -4   22.19    2.70
   9   8   4   20.97    2.40
  10   8   4   -0.24    0.68
 -10   8  -4    0.17    0.63
 -11  -9   4    1.10    0.67
 -11   9   4    1.27    0.75
  10  -9  -4    5.71    1.07
 -10  -9   4    6.92    1.37
 -10   9   4    4.15    0.95
   9  -9  -4   26.20    2.09
  -9  -9   4   17.37    2.44
  -9   9   4   25.45    2.10
  -8  -9   4    0.17    0.42
  -8  -9   4   -0.01    0.43
   8  -9  -4    0.08    0.38
  -8   9   4    0.02    0.33
  -7  -9   4   63.05    4.20
   7  -9  -4   56.43    3.82
  -7  -9   4   58.55    4.51
   7  -9  -4   57.33    4.27
  -7   9   4   52.48    4.27
  -7   9   4   48.30    3.74
  -6  -9   4   15.75    1.51
  -6  -9   4   15.67    1.66
   6  -9  -4   15.78    1.53
   6  -9  -4   15.19    1.41
  -6   9   4   15.23    1.60
  -6   9   4   12.91    1.28
   5  -9  -4    6.94    0.95
   5  -9  -4    8.40    1.12
  -5  -9   4    4.21    0.77
  -5  -9   4    7.26    1.04
  -5  -9   4    6.01    1.02
  -5   9   4    6.01    0.83
  -5   9   4    8.50    1.21
   4  -9  -4   -0.01    0.22
   4  -9  -4    0.06    0.25
  -4  -9   4    0.40    0.35
  -4  -9   4    0.25    0.31
  -4  -9   4    0.67    0.36
  -4   9   4    0.02    0.26
  -3  -9   4  115.74    8.32
   3  -9  -4  120.19    8.33
  -3  -9   4  107.19    7.76
  -3  -9   4  133.78    7.88
   3  -9  -4  109.04    7.73
  -3   9   4  116.35    8.31
  -2  -9   4   21.30    1.65
   2  -9  -4   16.12    1.61
  -2  -9   4   20.92    1.80
  -2  -9   4   15.92    1.61
   2  -9  -4   19.07    1.79
  -2   9   4   22.55    1.75
   1  -9  -4   -0.05    0.20
  -1  -9   4    0.36    0.25
   1  -9  -4   -0.17    0.25
  -1  -9   4   -0.07    0.17
  -1  -9   4    0.12    0.24
  -1   9   4   -0.03    0.33
  -1   9   4   -0.02    0.17
   0  -9  -4   53.88    4.02
   0  -9   4   56.21    4.00
   0  -9  -4   54.38    4.34
   0  -9   4   54.85    3.95
   0   9   4   66.10    4.34
  -1  -9  -4  107.81    7.45
  -1  -9  -4  102.96    6.91
   1  -9   4   97.05    7.18
   1  -9   4  108.79    6.87
   1  -9   4  105.64    6.84
   1   9   4   95.42    6.39
   1   9   4  105.07    7.44
  -1   9  -4  101.33    7.16
   2  -9   4    4.41    0.70
   2  -9   4    3.62    0.60
  -2  -9  -4    6.81    0.95
  -2   9  -4    4.01    0.85
   2   9   4    6.34    0.82
   3  -9   4   22.48    1.93
  -3  -9  -4   25.86    2.11
   3  -9   4   25.55    1.98
  -3  -9  -4   24.41    2.28
  -3  -9  -4   27.08    2.04
   3   9   4   26.57    2.00
  -3   9  -4   26.36    2.27
  -4  -9  -4   20.43    1.64
   4  -9   4   17.22    1.51
  -4  -9  -4   16.11    1.60
  -4   9  -4   17.59    1.82
   4   9   4   18.79    1.63
  -5  -9  -4   52.10    4.45
  -5  -9  -4   61.10    4.17
  -5  -9  -4   57.29    4.12
   5  -9   4   53.08    4.00
  -5   9  -4   59.38    4.48
   5   9   4   59.83    4.02
   6  -9   4    3.94    0.70
  -6  -9  -4    1.75    0.57
  -6  -9  -4    3.57    0.73
  -6   9  -4    2.82    0.87
   6   9   4    3.88    0.83
  -7  -9  -4   41.40    3.41
   7  -9   4   38.68    2.99
   7   9   4   40.02    3.10
  -7   9  -4   34.93    3.36
  -8  -9  -4    5.36    1.17
   8  -9   4    4.92    0.87
   8   9   4    6.21    1.21
  -8   9  -4    6.01    1.26
  -9  -9  -4    0.86    0.59
   9   9   4    1.99    0.87
  -9   9  -4    1.18    0.67
  10   9   4   24.16    2.72
 -10   9  -4   20.88    2.76
 -11 -10   4   25.18    3.06
 -10 -10   4    0.30    0.52
  -9 -10   4    1.00    0.62
  -8 -10   4   -0.04    0.51
  -7 -10   4   24.09    2.49
  -7 -10   4   27.76    2.34
  -6 -10   4    0.89    0.52
   6 -10  -4    0.13    0.35
   6 -10  -4    0.71    0.40
  -6 -10   4    0.44    0.39
  -6  10   4    0.81    0.61
  -5 -10   4    7.17    1.10
  -5 -10   4    6.60    1.11
   5 -10  -4    6.75    1.02
  -5 -10   4    6.56    0.98
   5 -10  -4    7.75    1.15
  -5  10   4   12.64    1.43
  -4 -10   4    1.72    0.57
   4 -10  -4    1.64    0.50
  -4 -10   4    1.53    0.58
   4 -10  -4    1.40    0.47
  -4 -10   4    1.98    0.51
  -4  10   4    2.99    0.54
  -3 -10   4    0.08    0.33
  -3 -10   4    0.22    0.26
  -3 -10   4    0.19    0.31
   3 -10  -4    0.35    0.29
   3 -10  -4   -0.08    0.26
  -2 -10   4    0.00    0.21
  -2 -10   4    0.32    0.30
  -2 -10   4    0.26    0.27
   2 -10  -4    0.17    0.26
   2 -10  -4    0.06    0.23
   1 -10  -4   66.47    4.80
  -1 -10   4   76.28    5.10
   1 -10  -4   67.17    5.15
  -1 -10   4   64.33    4.76
  -1 -10   4   69.10    4.75
  -1  10   4   67.08    5.16
   0 -10   4   -0.13    0.18
   0 -10   4    0.14    0.23
   0 -10  -4    0.14    0.23
   0 -10   4   -0.25    0.24
   0 -10  -4   -0.19    0.24
   1 -10   4   47.74    3.41
   1 -10   4   44.59    3.34
   1 -10   4   50.93    3.55
  -1 -10  -4   45.75    3.48
  -1 -10  -4   44.56    3.72
  -2 -10  -4   10.78    1.42
   2 -10   4    8.85    1.03
  -2 -10  -4    8.12    1.18
   2 -10   4    9.21    1.12
  -3 -10  -4    8.13    1.12
  -3 -10  -4    7.01    0.96
   3 -10   4   10.04    1.12
   3 -10   4    9.71    0.94
  -4 -10  -4    0.64    0.43
  -4 -10  -4    0.95    0.49
  -4 -10  -4    0.96    0.38
   4 -10   4    0.63    0.27
  -4  10  -4    1.06    0.63
   5 -10   4   74.34    4.95
  -5 -10  -4   71.96    5.05
  -5 -10  -4   71.18    5.05
  -5 -10  -4   69.50    5.47
  -5  10  -4   62.25    5.31
   5  10   4   73.24    4.83
  -6 -10  -4    0.03    0.38
  -6 -10  -4    0.34    0.45
  -6 -10  -4    0.31    0.38
   6 -10   4    0.17    0.30
   6  10   4    0.72    0.49
  -6  10  -4    0.04    0.65
  -7 -10  -4   -0.05    0.42
   7 -10   4    0.35    0.31
   7  10   4    0.31    0.49
  -7  10  -4    0.92    0.66
  -8 -10  -4    0.31    0.52
  -8  10  -4    0.26    0.61
   8  10   4   -0.13    0.62
  -9 -10  -4   36.64    3.69
   9  10   4   42.54    3.59
  -9  10  -4   53.67    4.13
 -10 -11   4    1.61    0.78
  -9 -11   4   36.88    3.45
  -8 -11   4    0.08    0.52
  -7 -11   4   48.60    4.09
   6 -11  -4    3.62    0.79
  -6 -11   4    4.69    1.05
   6 -11  -4    4.98    0.94
  -6  11   4    4.45    0.97
  -5 -11   4   32.04    2.84
   5 -11  -4   34.63    2.76
   5 -11  -4   32.62    2.58
  -5 -11   4   30.39    2.59
  -5 -11   4   29.97    2.64
  -5  11   4   30.01    2.79
   4 -11  -4    1.96    0.59
  -4 -11   4    1.36    0.50
   4 -11  -4    1.33    0.51
  -4 -11   4    1.05    0.48
  -4 -11   4    1.86    0.62
  -3 -11   4  114.77    8.20
   3 -11  -4  120.21    8.75
  -3 -11   4  118.94    8.76
   3 -11  -4  120.40    8.20
  -3 -11   4  131.88    8.28
  -3  11   4  127.25    8.79
  -2 -11   4    2.48    0.63
  -2 -11   4    1.99    0.50
   2 -11  -4    2.49    0.70
  -2 -11   4    2.00    0.58
   2 -11  -4    1.88    0.56
  -2  11   4    4.46    0.92
   1 -11  -4    0.25    0.33
   1 -11  -4    0.06    0.35
  -1 -11   4   -0.24    0.27
  -1 -11   4    0.02    0.23
  -1 -11   4    0.30    0.28
   0 -11   4   -0.06    0.23
   0 -11   4    0.06    0.23
   0 -11  -4    0.05    0.27
   0 -11   4   -0.21    0.28
   0 -11  -4    0.58    0.37
   1 -11   4   93.00    6.23
   1 -11   4   94.20    6.57
  -1 -11  -4   73.84    6.23
  -1 -11  -4  105.42    6.91
   1 -11   4   94.91    6.26
   2 -11   4   -0.02    0.20
  -2 -11  -4    0.18    0.23
  -2 -11  -4    0.43    0.36
   2 -11   4    0.17    0.32
  -2 -11  -4    0.35    0.28
  -3 -11  -4   33.98    2.49
  -3 -11  -4   26.09    2.48
   3 -11   4   30.00    2.42
  -3 -11  -4   31.36    2.82
   3 -11   4   33.90    2.43
  -4 -11  -4    7.79    1.05
   4 -11   4    7.50    0.96
  -4 -11  -4    6.77    1.13
  -4 -11  -4    8.92    1.37
  -5 -11  -4   21.48    2.31
  -5 -11  -4   20.65    2.00
  -5 -11  -4   24.49    2.15
   5 -11   4   26.30    2.00
  -6 -11  -4    6.29    1.28
   6 -11   4    8.45    1.09
  -6  11  -4    9.85    1.60
  -7 -11  -4   34.31    3.06
  -7  11  -4   28.24    2.94
  -8 -11  -4    3.62    1.01
  -8  11  -4    4.18    1.12
  -9 -11  -4    0.34    0.57
  -9  11  -4    1.10    0.75
  -9 -12   4    0.84    0.61
  -8 -12   4   23.19    2.83
  -7 -12   4    9.18    1.51
   6 -12  -4   -0.59    0.35
  -6 -12   4    0.05    0.36
  -6  12   4   -0.12    0.56
   5 -12  -4   14.68    1.74
   5 -12  -4   14.43    1.76
  -5 -12   4   15.07    1.89
  -4 -12   4   42.68    3.27
   4 -12  -4   35.60    3.20
   4 -12  -4   40.64    3.45
  -4 -12   4   41.23    3.54
  -4  12   4   51.95    3.55
  -3 -12   4    8.62    1.33
   3 -12  -4   10.17    1.40
   3 -12  -4    7.63    1.18
  -3 -12   4    6.90    1.03
  -3  12   4   10.67    1.49
  -2 -12   4   38.98    3.18
  -2 -12   4   42.09    3.38
   2 -12  -4   40.56    3.22
   2 -12  -4   43.11    3.44
  -2 -12   4   39.42    3.11
  -2  12   4   42.85    3.48
  -1 -12   4   14.14    1.43
  -1 -12   4   12.14    1.26
  -1 -12   4   11.38    1.45
   1 -12  -4   12.79    1.68
   1 -12  -4   12.54    1.57
   0 -12   4   19.38    1.80
   0 -12  -4   17.25    1.77
   0 -12  -4   17.91    1.91
   0 -12   4   19.69    1.68
   0 -12   4   20.13    1.79
  -1 -12  -4   21.03    2.13
   1 -12   4   21.45    1.88
   1 -12   4   21.21    1.78
  -1 -12  -4   19.53    1.90
   2 -12   4   44.21    3.23
  -2 -12  -4   40.16    3.19
   2 -12   4   49.63    3.36
  -2 -12  -4   41.34    3.64
  -3 -12  -4    1.66    0.49
   3 -12   4    1.45    0.42
   3 -12   4    1.55    0.59
  -3 -12  -4    1.28    0.54
  -4 -12  -4   -0.52    0.36
  -4 -12  -4    0.29    0.39
   4 -12   4    0.24    0.27
  -5 -12  -4   28.64    2.40
   5 -12   4   25.51    2.24
  -5 -12  -4   30.39    2.76
  -6 -12  -4   18.48    2.32
  -7 -12  -4    3.46    1.05
  -8 -12  -4    6.68    1.40
  -9 -13   4    1.11    0.79
  -8 -13   4    4.70    1.16
  -7 -13   4    7.92    1.52
  -6 -13   4   21.75    2.32
   5 -13  -4    0.88    0.53
  -5 -13   4    1.92    0.75
  -5  13   4    2.07    0.66
   4 -13  -4    6.53    1.09
  -4 -13   4    5.35    0.96
  -4 -13   4    5.78    1.19
  -4  13   4    5.04    1.08
  -3 -13   4   11.06    1.58
  -3 -13   4   11.01    1.39
   3 -13  -4    9.86    1.49
  -3  13   4   10.71    1.58
  -2 -13   4   29.79    2.54
  -2 -13   4   30.51    2.76
   2 -13  -4   34.79    2.87
   1 -13  -4    0.06    0.39
  -1 -13   4    0.75    0.40
  -1 -13   4    0.93    0.45
   0 -13   4   54.64    3.93
   0 -13   4   51.63    4.16
   0 -13  -4   54.94    4.39
  -1 -13  -4   20.76    1.70
  -1 -13  -4   18.37    2.04
   1 -13   4   20.08    2.23
   1 -13   4   18.96    1.73
  -2 -13  -4    0.15    0.23
   2 -13   4   -0.34    0.34
   2 -13   4    0.21    0.28
  -2 -13  -4    0.67    0.49
  -3 -13  -4    0.90    0.52
  -3 -13  -4    1.45    0.48
   3 -13   4    0.67    0.35
  -4 -13  -4   37.53    3.20
   4 -13   4   32.36    2.61
  -4 -13  -4   30.91    2.66
  -5 -13  -4    7.03    1.41
  -5 -13  -4    8.03    1.20
  -6 -13  -4   10.98    1.73
  -7 -13  -4    0.08    0.54
  -8 -14   4   32.55    3.28
  -7 -14   4    2.65    0.93
  -6 -14   4    2.03    0.83
   5 -14  -4    7.99    1.29
  -5 -14   4    6.39    1.29
  -5  14   4    5.46    1.22
   4 -14  -4   61.12    5.03
  -4 -14   4   59.86    5.09
  -4 -14   4   72.21    4.84
   3 -14  -4    3.12    0.86
  -3 -14   4    3.23    0.75
  -3 -14   4    2.83    0.83
  -2 -14   4   18.93    2.04
   2 -14  -4   21.63    2.13
  -2 -14   4   20.98    1.92
  -1 -14   4   17.63    1.81
   1 -14  -4   16.82    2.11
  -1 -14   4   16.38    1.65
   1 -14  -4   18.17    1.49
   0 -14  -4   15.53    1.93
   0 -14  -4   14.20    1.32
   0 -14   4   11.24    1.46
   0 -14   4   16.89    1.66
  -1 -14  -4    0.23    0.42
   1 -14   4    0.17    0.27
  -1 -14  -4   -0.11    0.21
  -2 -14  -4   59.02    4.59
   2 -14   4   56.35    4.03
  -2 -14  -4   50.00    3.97
  -3 -14  -4    2.90    0.68
  -3 -14  -4    2.99    0.95
  -4 -14  -4    0.74    0.50
  -5 -14  -4   -0.15    0.49
  -6 -14  -4   27.80    2.88
  -6 -15   4    8.84    1.57
  -5 -15   4    0.42    0.56
   4 -15  -4   -0.06    0.43
  -4 -15   4   -0.33    0.45
   3 -15  -4   16.98    2.03
  -3 -15   4   11.19    1.52
  -3 -15   4   12.60    1.81
  -2 -15   4    0.88    0.52
  -2 -15   4    0.92    0.51
   2 -15  -4    1.61    0.67
  -1 -15   4    0.34    0.42
   1 -15  -4    0.52    0.51
  -1 -15   4    0.82    0.53
   0 -15  -4    9.58    1.51
  -1 -15  -4   10.16    1.62
  -2 -15  -4    2.62    0.85
  -3 -15  -4   14.80    2.13
  -4 -15  -4   15.72    2.21
  -5 -15  -4    0.25    0.62
  -4 -16   4    4.64    1.12
   4 -16  -4    6.68    1.31
   3 -16  -4    0.28    0.49
  -3 -16   4    0.37    0.56
  -2 -16   4    3.36    0.94
   2 -16  -4    5.28    1.15
  -1 -16   4   52.27    4.25
   1 -16  -4   49.94    4.32
   0 -16  -4    3.39    0.95
  -1 -16  -4   11.65    1.84
  -2 -16  -4    5.72    1.30
  -3 -16  -4   20.12    2.58
 -13   0   5   18.53    2.08
  13   0  -5   12.85    1.96
  12   0  -5   -0.09    0.45
 -12   0   5   -0.04    0.40
 -11   0   5   24.91    2.09
 -11   0   5   18.85    2.39
  11   0  -5   23.94    2.16
  10   0  -5   -0.09    0.31
 -10   0   5   -0.20    0.55
 -10   0   5    0.32    0.34
   9   0  -5  110.75    7.35
  -9   0   5  124.88    8.23
  -9   0   5  106.65    7.28
  -8   0   5    0.00    0.28
  -8   0   5    0.06    0.26
   8   0  -5    0.02    0.26
  -8   0   5    0.30    0.40
  -7   0   5    2.91    0.55
  -7   0   5    2.86    0.67
  -7   0   5    2.33    0.54
  -6   0   5    0.07    0.20
  -6   0   5   -0.06    0.21
   6   0  -5   -0.22    0.34
  -5   0   5   94.40    6.07
  -5   0   5  106.96    6.43
  -5   0   5   89.70    6.85
   5   0  -5   95.52    6.83
   5   0  -5  100.43    6.35
   4   0  -5   -0.12    0.10
  -4   0   5    0.03    0.23
  -4   0   5   -0.17    0.14
   4   0  -5    0.18    0.28
  -4   0   5   -0.38    0.23
   3   0  -5  267.62   15.38
  -3   0   5  229.65   15.21
  -3   0   5  232.86   14.34
   3   0  -5  248.73   16.06
  -3   0   5  224.50   16.26
   2   0  -5   -0.32    0.13
  -2   0   5    0.02    0.17
   2   0  -5   -0.09    0.11
  -2   0   5   -0.11    0.15
  -2   0   5   -0.19    0.13
  -1   0   5   82.78    5.36
  -1   0   5   82.85    5.09
  -1   0   5   80.82    5.37
  -1   0   5   82.22    5.70
   0   0   5   -0.13    0.22
   0   0   5    0.02    0.12
   0   0   5    0.24    0.15
   0   0  -5    0.01    0.19
   0   0   5   -0.12    0.12
   1   0   5  280.91   20.50
  -1   0  -5  340.13   21.32
   1   0   5  326.03   20.14
   1   0   5  332.96   21.52
   1   0   5  328.14   19.13
   2   0   5    0.03    0.26
  -2   0  -5   -0.09    0.24
   2   0   5   -0.46    0.13
  -2   0  -5    0.06    0.18
   2   0   5   -0.09    0.11
   3   0   5    0.50    0.33
  -3   0  -5    0.04    0.29
  -3   0  -5    1.09    0.41
   3   0   5    0.74    0.33
  -4   0  -5    0.26    0.28
   4   0   5    0.01    0.20
  -4   0  -5   -0.45    0.37
   4   0   5    0.14    0.23
  -4   0  -5   -0.01    0.21
  -5   0  -5   62.54    4.36
   5   0   5   49.46    3.81
   5   0   5   58.11    4.07
  -6   0  -5   -0.12    0.31
   6   0   5   -0.34    0.21
  -7   0  -5   24.57    2.30
   7   0   5   24.88    2.10
   8   0   5    0.13    0.36
  -8   0  -5   -0.38    0.35
  -9   0  -5   -0.17    0.37
   9   0   5   -0.03    0.33
 -10   0  -5    0.29    0.46
  10   0   5   -0.40    0.35
  11   0   5   47.93    3.83
 -11   0  -5   48.55    4.27
  13  -1  -5    2.87    0.90
 -13  -1   5    4.12    0.97
  13   1  -5    2.68    0.98
 -13   1   5    2.26    0.82
 -12  -1   5   -0.13    0.38
  12  -1  -5    0.66    0.52
 -12   1   5   -0.10    0.46
  12   1  -5   -0.31    0.45
  11  -1  -5   22.09    2.10
 -11  -1   5   23.63    2.27
 -11  -1   5   21.49    1.97
 -11   1   5   22.00    2.01
  11   1  -5   19.45    2.25
 -10  -1   5   15.95    1.77
 -10  -1   5   18.32    1.90
  10  -1  -5   16.75    1.86
  10   1  -5   18.69    1.73
 -10   1   5   15.74    1.81
  -9  -1   5    4.13    0.82
  -9  -1   5    3.45    0.62
  -9  -1   5    5.61    0.82
   9  -1  -5    3.73    0.79
  -9   1   5    2.34    0.73
  -9   1   5    3.43    0.75
   9   1  -5    2.16    0.65
  -8  -1   5   26.35    2.09
   8  -1  -5   27.11    2.15
  -8  -1   5   26.14    2.10
  -8   1   5   26.57    2.31
  -8   1   5   25.95    2.10
  -8   1   5   27.85    2.07
   8   1  -5   28.11    2.16
  -7  -1   5  186.83   11.17
  -7  -1   5  164.72   11.98
  -7  -1   5  162.74   10.57
  -7   1   5  168.48   10.60
  -7   1   5  175.59   11.95
   7   1  -5  167.48   10.62
  -7   1   5  182.57   11.12
  -6  -1   5   48.85    4.07
  -6  -1   5   57.42    3.81
   6  -1  -5   54.67    3.60
  -6  -1   5   51.85    3.61
  -6   1   5   56.48    3.77
  -6   1   5   53.12    3.63
   6   1  -5   55.72    4.12
  -6   1   5   59.83    4.05
   5  -1  -5  151.84   10.11
  -5  -1   5  149.37    9.03
  -5  -1   5  150.44    9.54
   5  -1  -5  148.61    9.44
  -5  -1   5  152.02   10.22
   5   1  -5  151.21    9.56
  -5   1   5  149.18    9.52
   5   1  -5  149.62   10.11
  -5   1   5  137.47    9.01
  -5   1   5  140.04   10.20
  -4  -1   5   54.27    3.41
  -4  -1   5   51.55    3.59
  -4  -1   5   49.02    3.85
   4  -1  -5   52.41    3.85
   4  -1  -5   52.84    3.43
  -4   1   5   55.45    3.85
  -4   1   5   49.59    3.56
   4   1  -5   49.96    3.85
   4   1  -5   55.59    3.56
  -4   1   5   54.60    3.43
  -3  -1   5   76.00    5.35
  -3  -1   5   78.88    5.01
   3  -1  -5   80.99    4.92
  -3  -1   5   73.75    4.71
  -3  -1   5   68.33    4.91
   3  -1  -5   72.80    5.30
   3   1  -5   81.21    5.03
   3   1  -5   71.90    5.32
  -3   1   5   72.82    5.34
  -3   1   5   76.14    4.73
  -3   1   5   79.60    5.01
  -2  -1   5    6.62    0.64
   2  -1  -5    5.20    0.73
   2  -1  -5    5.32    0.49
  -2  -1   5    4.24    0.57
  -2  -1   5    5.24    0.67
  -2  -1   5    4.31    0.57
  -2   1   5    5.04    0.66
   2   1  -5    3.34    0.65
  -2   1   5    4.82    0.60
  -2   1   5    4.72    0.60
  -1  -1   5  464.83   29.22
   1  -1  -5  479.37   29.63
  -1  -1   5  461.26   27.53
  -1  -1   5  466.69   31.19
  -1   1   5  459.93   31.21
  -1   1   5  470.17   27.56
   0  -1   5    7.42    0.76
   0  -1   5    6.16    0.63
   0  -1   5    6.99    0.65
   0  -1   5    5.45    0.69
   0   1  -5    5.81    0.87
   0   1   5    6.81    0.66
   0   1   5    6.22    0.73
   1  -1   5    5.93    0.61
   1  -1   5    5.43    0.72
  -1  -1  -5    7.91    0.95
   1  -1   5    7.01    0.78
   1   1   5    6.30    0.78
  -1   1  -5    5.60    0.86
   1   1   5    7.96    0.71
  -2  -1  -5    3.45    0.54
   2  -1   5    2.52    0.51
  -2  -1  -5    2.07    0.53
   2  -1   5    2.51    0.49
   2  -1   5    2.60    0.36
   2   1   5    2.44    0.39
  -2   1  -5    1.67    0.47
  -2   1  -5    0.54    0.43
   2   1   5    3.43    0.56
  -3  -1  -5  382.58   23.94
   3  -1   5  349.95   21.47
  -3  -1  -5  289.72   22.55
   3  -1   5  343.94   23.09
   3   1   5  403.29   24.16
  -3   1  -5  402.04   24.00
   4  -1   5    0.52    0.27
   4  -1   5    0.21    0.26
  -4  -1  -5    0.23    0.30
  -4  -1  -5    0.41    0.37
  -4  -1  -5    0.96    0.35
   4   1   5    0.10    0.23
   4   1   5    0.21    0.21
  -4   1  -5    0.31    0.37
  -4   1  -5    0.18    0.27
  -5  -1  -5   11.03    1.09
   5  -1   5   11.74    1.32
  -5  -1  -5   12.50    1.50
   5  -1   5   11.85    1.18
  -5   1  -5   13.95    1.60
   5   1   5    8.88    1.22
   6  -1   5   19.30    1.81
  -6  -1  -5   20.89    2.04
   6  -1   5   22.33    1.91
   6   1   5   25.39    1.97
  -6   1  -5   23.01    2.11
   7  -1   5   75.61    4.82
   7  -1   5   60.03    4.93
  -7  -1  -5   67.88    5.26
   7   1   5   71.82    4.82
  -7   1  -5   78.25    5.42
   8  -1   5    6.51    1.07
  -8  -1  -5    6.34    1.20
   8   1   5    6.36    1.13
  -8   1  -5    6.93    1.25
   9  -1   5   38.35    2.89
  -9  -1  -5   36.72    3.23
   9   1   5   37.38    2.92
  -9   1  -5   28.43    3.07
 -10  -1  -5    7.71    1.43
  10  -1   5    6.70    1.22
 -10   1  -5    7.87    1.49
  10   1   5    9.78    1.47
 -11  -1  -5    0.06    0.51
  11  -1   5    0.55    0.55
  11   1   5    0.15    0.54
 -11   1  -5    0.85    0.67
  13  -2  -5    8.89    1.52
 -13  -2   5    5.52    1.09
  13   2  -5    5.26    1.30
 -13   2   5    5.37    1.17
  12  -2  -5   30.02    2.75
 -12  -2   5   27.95    2.89
 -12  -2   5   36.13    2.76
  12   2  -5   34.66    2.91
 -12   2   5   35.29    2.83
  11  -2  -5    9.00    1.38
 -11  -2   5    8.79    1.45
 -11  -2   5    9.34    1.32
 -11   2   5    9.34    1.38
  11   2  -5   12.12    1.59
  10  -2  -5   14.62    1.73
 -10  -2   5   19.86    1.76
 -10  -2   5   10.55    1.49
 -10   2   5   15.92    1.88
 -10   2   5   13.84    1.66
  10   2  -5   15.55    1.77
  -9  -2   5   42.98    2.97
  -9  -2   5   37.08    2.67
   9  -2  -5   34.44    2.69
  -9  -2   5   31.49    2.62
  -9   2   5   36.31    2.95
  -9   2   5   31.90    2.62
   9   2  -5   29.82    2.59
   8  -2  -5   72.56    4.77
  -8  -2   5   67.00    5.30
  -8  -2   5   69.05    4.69
  -8  -2   5   74.07    4.87
   8   2  -5   70.12    4.74
  -8   2   5   74.01    5.28
  -8   2   5   69.27    4.71
  -7  -2   5    9.20    1.06
  -7  -2   5    8.27    1.02
  -7  -2   5    8.49    1.21
   7   2  -5    6.80    1.13
  -7   2   5    8.42    1.05
  -7   2   5   10.57    1.02
   7   2  -5    6.62    0.97
  -6  -2   5   65.51    4.08
  -6  -2   5   60.35    4.61
  -6  -2   5   66.82    4.28
   6   2  -5   61.23    4.61
  -6   2   5   58.73    4.56
  -6   2   5   60.09    4.07
  -5  -2   5   64.30    4.12
   5  -2  -5   55.56    4.10
  -5  -2   5   55.72    3.83
  -5  -2   5   51.42    3.61
   5   2  -5   57.32    4.15
  -5   2   5   52.80    3.64
  -5   2   5   54.25    4.10
  -4  -2   5    1.69    0.38
  -4  -2   5    1.70    0.42
  -4  -2   5    0.97    0.38
  -4  -2   5    0.96    0.28
   4  -2  -5    1.19    0.41
   4   2  -5    1.89    0.54
  -4   2   5    1.12    0.39
  -4   2   5    1.21    0.34
  -3  -2   5    1.04    0.27
  -3  -2   5    0.75    0.29
  -3  -2   5    1.12    0.35
   3  -2  -5    1.94    0.46
  -3   2   5    0.91    0.28
  -3   2   5    1.59    0.44
   3   2  -5    0.38    0.35
  -2  -2   5  247.34   14.90
  -2  -2   5  239.95   14.01
  -2  -2   5  221.56   15.06
  -2  -2   5  234.83   15.90
   2  -2  -5  246.34   15.72
   2   2  -5  212.53   15.65
  -2   2   5  241.26   14.06
  -2   2   5  240.53   15.92
  -1  -2   5   17.51    1.36
  -1  -2   5   18.39    1.41
  -1  -2   5   16.37    1.27
  -1  -2   5   18.00    1.43
   1   2  -5   15.36    1.52
  -1   2   5   18.32    1.46
  -1   2   5   18.97    1.35
   0  -2   5   67.21    4.41
   0  -2   5   68.78    4.64
   0  -2   5   77.07    4.78
   0  -2   5   70.26    4.92
   0   2   5   68.66    4.47
   0   2   5   73.40    4.99
   1  -2   5   81.46    4.86
   1  -2   5   77.62    5.19
   1  -2   5   72.61    5.01
  -1  -2  -5   76.93    5.09
  -1  -2  -5   78.95    5.45
  -1  -2  -5   77.86    5.45
   1   2   5   79.21    4.91
  -1   2  -5   77.53    5.50
   1   2   5   75.56    5.40
   2  -2   5   38.36    2.73
   2  -2   5   42.53    2.89
  -2  -2  -5   41.19    3.10
  -2  -2  -5   43.80    2.85
   2  -2   5   37.35    2.73
  -2  -2  -5   42.87    3.05
   2   2   5   40.23    2.80
  -2   2  -5   40.58    3.18
   2   2   5   41.05    3.00
   3  -2   5   32.16    2.12
  -3  -2  -5   32.53    2.21
   3  -2   5   30.49    2.34
   3  -2   5   30.24    2.21
  -3  -2  -5   33.50    2.43
  -3  -2  -5   31.64    2.50
   3   2   5   30.71    2.36
  -3   2  -5   27.96    2.19
  -3   2  -5   36.82    2.58
   3   2   5   27.36    2.24
  -4  -2  -5   80.54    6.27
  -4  -2  -5   86.97    6.23
   4  -2   5   90.15    6.03
  -4  -2  -5   98.46    5.80
  -4   2  -5   90.09    6.40
   4   2   5   82.90    5.71
  -4   2  -5   89.97    5.70
  -5  -2  -5    0.14    0.26
  -5  -2  -5    0.75    0.39
   5  -2   5    0.81    0.38
  -5  -2  -5    0.00    0.23
   5  -2   5    0.39    0.31
  -5   2  -5    0.30    0.32
   5   2   5    0.43    0.35
   6  -2   5    0.35    0.28
   6  -2   5    0.15    0.28
  -6  -2  -5    0.19    0.28
  -6   2  -5    0.23    0.39
   6   2   5    0.34    0.32
   7  -2   5   44.51    3.35
   7  -2   5   37.53    3.12
  -7  -2  -5   42.94    3.53
   7   2   5   46.47    3.32
  -7   2  -5   49.06    3.71
  -8  -2  -5   62.51    4.81
   8  -2   5   59.73    4.48
   8  -2   5   62.75    4.31
  -8   2  -5   61.95    4.88
   8   2   5   57.58    4.33
  -9  -2  -5    0.41    0.45
   9  -2   5    0.03    0.32
   9  -2   5    0.13    0.34
   9   2   5   -0.20    0.40
  -9   2  -5    0.08    0.41
  10  -2   5   16.91    2.01
 -10  -2  -5   15.86    2.17
 -10   2  -5   19.07    2.47
  10   2   5   19.69    2.27
  11  -2   5   20.28    2.40
 -11  -2  -5   26.95    3.00
 -11   2  -5   22.77    2.83
  11   2   5   21.23    2.51
  13  -3  -5    4.43    1.09
 -13  -3   5    3.50    0.87
 -13   3   5    4.37    1.13
  13   3  -5    3.89    1.14
  12  -3  -5    0.12    0.46
 -12  -3   5    1.43    0.58
 -12  -3   5    0.69    0.57
  12   3  -5    1.22    0.82
 -12   3   5    0.64    0.62
 -11  -3   5    2.05    0.61
  11  -3  -5    1.50    0.61
 -11  -3   5    1.98    0.76
  11   3  -5    1.13    0.64
 -11   3   5    2.37    0.71
  10  -3  -5   74.80    4.97
 -10  -3   5   75.26    4.86
 -10  -3   5   76.67    5.53
  10   3  -5   68.05    4.90
 -10   3   5   62.13    5.32
 -10   3   5   71.96    4.92
  -9  -3   5    0.56    0.46
  -9  -3   5    0.25    0.32
   9  -3  -5    0.04    0.32
   9  -3  -5    0.17    0.15
  -9  -3   5    0.13    0.32
  -9   3   5    0.27    0.32
   9   3  -5    0.23    0.33
  -9   3   5    0.94    0.57
  -8  -3   5   11.75    1.34
   8  -3  -5   13.01    1.44
  -8  -3   5   14.11    1.68
  -8  -3   5   13.54    1.28
  -8   3   5   13.99    1.46
  -8   3   5   13.35    1.47
   8   3  -5   10.35    1.33
   8   3  -5   13.41    1.68
  -7  -3   5    3.83    0.65
  -7  -3   5    3.77    0.69
  -7  -3   5    5.77    0.96
   7   3  -5    4.33    0.71
   7   3  -5    6.26    0.80
  -7   3   5    2.88    0.63
  -6  -3   5   71.40    4.71
  -6  -3   5   73.83    5.00
  -6  -3   5   71.00    5.41
   6   3  -5   81.77    5.42
  -6   3   5   69.68    5.35
  -6   3   5   77.15    4.80
  -5  -3   5   20.84    1.78
  -5  -3   5   19.68    1.55
  -5  -3   5   21.05    1.52
  -5  -3   5   18.78    1.59
   5  -3  -5   16.84    1.68
   5   3  -5   18.71    1.79
  -5   3   5   19.79    1.53
  -5   3   5   22.26    1.74
  -4  -3   5  116.66    7.32
   4  -3  -5  100.14    7.14
  -4  -3   5  101.56    6.35
  -4  -3   5  104.47    6.79
  -4  -3   5  105.07    6.78
  -4   3   5  100.26    6.40
   4   3  -5  104.86    7.20
  -4   3   5   94.69    7.21
  -3  -3   5    0.17    0.24
  -3  -3   5    0.14    0.27
  -3  -3   5    0.43    0.21
  -3  -3   5    0.09    0.21
   3  -3  -5    0.21    0.22
  -3   3   5   -0.01    0.17
   3   3  -5   -0.14    0.33
  -2  -3   5    2.16    0.42
  -2  -3   5    1.61    0.33
  -2  -3   5    0.72    0.30
  -2  -3   5    1.13    0.34
  -2   3   5    1.49    0.40
  -2   3   5    1.26    0.35
   2   3  -5    1.40    0.46
  -1  -3   5   20.28    1.60
  -1  -3   5   23.23    1.71
  -1  -3   5   19.93    1.64
   1  -3  -5   23.40    1.69
  -1  -3   5   21.02    1.49
   1   3  -5   19.57    1.79
  -1   3   5   22.05    1.58
  -1   3   5   22.63    1.75
   0  -3   5  106.49    7.20
   0  -3   5  108.82    6.67
   0  -3   5  112.82    7.50
   0  -3  -5  101.09    7.59
   0  -3   5  106.21    7.05
   0  -3  -5  112.72    7.12
   0   3   5  118.05    7.61
   0   3   5  110.24    6.76
  -1  -3  -5   -0.07    0.17
   1  -3   5   -0.11    0.10
  -1  -3  -5    0.43    0.25
   1  -3   5    0.00    0.13
  -1   3  -5    0.13    0.34
   1   3   5   -0.04    0.17
   1   3   5   -0.02    0.14
   2  -3   5  191.00   11.41
   2  -3   5  191.47   11.95
  -2  -3  -5  166.60   12.87
  -2  -3  -5  212.37   12.79
  -2  -3  -5  200.64   12.06
   2  -3   5  180.69   12.26
   2   3   5  188.64   11.49
   2   3   5  190.20   12.87
  -2   3  -5  183.21   12.83
   3  -3   5   66.47    4.32
   3  -3   5   66.44    4.28
  -3  -3  -5   70.57    4.45
  -3  -3  -5   64.76    4.77
   3  -3   5   67.80    4.57
  -3  -3  -5   65.26    4.78
   3   3   5   63.87    4.37
  -3   3  -5   67.53    4.89
   3   3   5   65.01    4.74
   4  -3   5   10.34    0.85
   4  -3   5   12.31    1.09
  -4  -3  -5   11.70    1.18
  -4  -3  -5   11.91    1.18
  -4  -3  -5   12.10    1.01
   4  -3   5   10.31    1.08
   4   3   5   11.52    1.30
  -4   3  -5    9.84    1.38
  -5  -3  -5    4.09    0.78
   5  -3   5    2.65    0.59
   5  -3   5    3.54    0.64
  -5  -3  -5    3.14    0.50
   5   3   5    3.43    0.71
  -5   3  -5    3.70    0.83
  -6  -3  -5   77.09    5.49
   6  -3   5   75.24    5.21
   6  -3   5   78.41    4.95
  -6   3  -5   66.60    5.52
   6   3   5   73.50    5.04
  -7  -3  -5    7.76    1.23
   7  -3   5    7.69    1.08
   7  -3   5    6.05    0.98
   7   3   5    8.34    1.23
   8  -3   5   28.65    2.45
   8  -3   5   27.97    2.36
  -8  -3  -5   30.60    2.66
   8   3   5   29.54    2.49
  -8   3  -5   28.00    2.72
  -9  -3  -5    2.25    0.74
   9  -3   5    1.73    0.60
   9  -3   5    0.89    0.49
  -9   3  -5    1.44    0.72
   9   3   5    0.00    0.49
  10  -3   5   15.89    1.92
  10  -3   5   15.76    1.96
 -10  -3  -5   19.13    2.29
 -10   3  -5   17.21    2.36
  10   3   5   18.84    2.22
 -11  -3  -5    3.07    1.06
  11  -3   5    4.91    1.09
  11   3   5    3.82    1.19
 -11   3  -5    4.45    1.19
  13  -4  -5    0.51    0.63
  13   4  -5    0.00    0.71
 -13   4   5    0.21    0.61
 -12  -4   5   19.90    2.07
 -12  -4   5   21.24    2.47
  12  -4  -5   18.32    2.14
 -12   4   5   18.70    2.17
  12   4  -5   12.66    1.90
 -11  -4   5    0.26    0.49
 -11  -4   5   -0.15    0.32
  11  -4  -5    0.59    0.45
  11   4  -5    0.04    0.53
 -11   4   5    0.23    0.49
  10  -4  -5   15.48    1.19
  10  -4  -5   13.12    1.66
 -10  -4   5   14.16    1.62
 -10  -4   5   18.53    1.86
  10   4  -5   13.70    1.68
 -10   4   5   15.63    1.75
   9  -4  -5    5.08    0.92
  -9  -4   5    3.89    0.70
  -9  -4   5    3.61    0.73
  -9   4   5    5.07    0.99
  -9   4   5    5.76    0.96
   9   4  -5    3.86    0.97
   9   4  -5    2.74    0.73
  -8  -4   5   39.84    2.83
  -8  -4   5   41.77    2.94
   8  -4  -5   39.96    2.91
   8  -4  -5   40.44    2.88
   8   4  -5   37.60    3.24
   8   4  -5   36.05    2.83
  -8   4   5   36.44    2.84
  -8   4   5   39.82    3.16
  -7  -4   5    4.88    0.89
  -7  -4   5    4.82    0.78
  -7  -4   5    5.02    0.79
   7  -4  -5    6.49    0.84
  -7   4   5    5.28    0.84
  -7   4   5    6.90    0.91
   7   4  -5    4.34    0.76
   7   4  -5    5.98    1.02
  -6  -4   5  117.83    7.53
  -6  -4   5  116.18    7.99
  -6  -4   5  123.33    8.62
   6  -4  -5  121.59    7.99
  -6   4   5  124.79    8.54
   6   4  -5  125.71    7.59
   6   4  -5  130.26    8.55
  -6   4   5  117.76    7.59
  -5  -4   5   18.02    1.80
   5  -4  -5   19.38    1.63
  -5  -4   5   20.34    1.53
   5  -4  -5   20.80    1.78
  -5  -4   5   20.08    1.67
  -5  -4   5   18.92    1.65
  -5   4   5   21.08    1.60
  -5   4   5   19.77    1.77
   5   4  -5   25.79    1.79
   4  -4  -5    3.34    0.62
   4  -4  -5    4.06    0.66
  -4  -4   5    4.83    0.69
  -4  -4   5    4.41    0.68
  -4  -4   5    5.08    0.61
  -4  -4   5    4.01    0.70
   4   4  -5    3.95    0.75
  -4   4   5    4.01    0.61
  -4   4   5    4.15    0.70
  -3  -4   5   79.26    4.72
  -3  -4   5   75.01    5.08
  -3  -4   5   74.35    5.12
  -3  -4   5   72.66    5.42
   3  -4  -5   74.58    5.09
   3  -4  -5   82.59    5.37
  -3   4   5   72.24    5.39
  -3   4   5   76.83    4.79
   3   4  -5   78.56    5.40
  -2  -4   5  283.10   17.18
  -2  -4   5  305.63   18.37
  -2  -4   5  248.67   17.38
  -2  -4   5  288.11   16.08
   2  -4  -5  270.66   17.19
   2   4  -5  223.65   17.97
  -2   4   5  279.80   16.18
  -1  -4   5   11.11    0.94
   1  -4  -5   14.35    1.17
   1  -4  -5   11.82    1.19
  -1  -4   5   12.04    1.06
  -1  -4   5   14.66    1.15
  -1  -4   5   12.67    1.11
  -1   4   5   12.86    1.06
   1   4  -5   10.88    1.20
  -1   4   5   12.44    1.16
   0  -4   5  130.91    7.79
   0  -4  -5  119.82    8.94
   0  -4   5  132.52    8.47
   0  -4  -5  135.88    8.38
   0  -4   5  123.02    8.80
   0  -4   5  132.15    8.31
   0   4   5  126.92    7.91
   0   4  -5  129.89    8.88
   0   4   5  132.01    8.94
   1  -4   5   65.42    4.06
  -1  -4  -5   63.24    4.68
   1  -4   5   66.64    4.40
   1  -4   5   63.80    4.27
   1  -4   5   62.31    4.48
  -1  -4  -5   62.78    4.33
   1   4   5   65.26    4.19
   1   4   5   67.94    4.66
  -1   4  -5   62.27    4.68
   2  -4   5  147.94    8.97
  -2  -4  -5  148.71    9.52
  -2  -4  -5  148.54   10.23
  -2  -4  -5  159.68   10.07
   2  -4   5  135.59    9.64
   2  -4   5  145.88    9.41
   2   4   5  141.02   10.16
   2   4   5  153.40    9.11
  -2   4  -5  153.60   10.19
   3  -4   5    0.48    0.26
   3  -4   5    0.19    0.20
  -3  -4  -5    0.49    0.26
  -3  -4  -5    0.28    0.25
   3  -4   5    0.47    0.19
   3   4   5    0.23    0.23
   3   4   5    0.08    0.29
   4  -4   5  109.10    6.54
  -4  -4  -5  101.59    7.33
  -4  -4  -5  114.36    6.82
   4  -4   5   93.05    6.61
  -4  -4  -5   98.33    7.23
   4  -4   5  108.00    6.98
  -4   4  -5  107.65    7.43
   4   4   5  103.42    6.64
   5  -4   5   33.24    2.65
  -5  -4  -5   40.26    3.00
   5  -4   5   37.02    2.82
  -5  -4  -5   39.52    3.01
  -5  -4  -5   42.23    2.84
  -5  -4  -5   33.37    2.64
  -5   4  -5   39.52    3.17
   5   4   5   36.37    2.80
   6  -4   5   -0.05    0.28
  -6  -4  -5    0.54    0.49
  -6  -4  -5    0.39    0.30
   6  -4   5    0.23    0.28
   6   4   5    0.17    0.33
  -6   4  -5    0.12    0.34
   7  -4   5    9.62    1.21
   7  -4   5    6.12    0.97
  -7  -4  -5    9.32    1.30
   7   4   5    8.95    1.32
  -7   4  -5    5.98    1.18
   8  -4   5   71.78    4.98
  -8  -4  -5   77.63    5.31
   8  -4   5   65.01    4.65
   8   4   5   58.09    4.75
  -8   4  -5   67.00    5.36
   9  -4   5    7.95    1.22
  -9  -4  -5    8.16    1.33
   9  -4   5    4.83    0.96
   9   4   5    5.20    1.18
  -9   4  -5    8.24    1.49
  10  -4   5   11.72    1.60
 -10  -4  -5   11.69    1.80
  10   4   5   11.14    1.80
 -10   4  -5   11.05    1.90
 -11  -4  -5   -0.04    0.53
  11  -4   5    0.17    0.46
  11   4   5    0.73    0.73
 -11   4  -5   -0.03    0.53
 -13  -5   5   11.60    1.93
  13  -5  -5   15.29    2.06
  13   5  -5   13.83    2.00
  13   5  -5   16.17    2.28
 -13   5   5   15.87    1.99
 -12  -5   5    0.27    0.43
  12  -5  -5    0.29    0.52
 -12  -5   5    0.24    0.56
 -12   5   5   -0.23    0.58
  12   5  -5    0.10    0.54
  12   5  -5    0.76    0.60
 -11  -5   5   14.02    1.58
  11  -5  -5   12.11    1.58
  11  -5  -5   10.45    0.99
 -11  -5   5   13.19    1.85
  11   5  -5   12.84    1.89
 -11   5   5   12.74    1.65
  11   5  -5   10.79    1.58
 -10  -5   5   40.68    3.28
 -10  -5   5   36.22    2.74
  10  -5  -5   33.04    2.81
 -10   5   5   33.30    2.78
  10   5  -5   37.39    3.26
  10   5  -5   34.00    2.79
   9  -5  -5   13.43    1.57
  -9  -5   5   14.28    1.38
  -9  -5   5   14.26    1.52
  -9  -5   5   15.51    1.85
   9   5  -5   12.76    1.51
  -9   5   5   13.23    1.57
   9   5  -5   13.14    1.82
  -9   5   5   11.38    1.56
   8  -5  -5   15.62    1.43
   8  -5  -5   16.59    1.52
  -8  -5   5   16.11    1.44
  -8  -5   5   15.53    1.48
  -8   5   5   16.33    1.52
  -8   5   5   15.01    1.74
   8   5  -5   16.96    1.74
   8   5  -5   14.78    1.42
   7  -5  -5   44.91    2.99
  -7  -5   5   36.20    3.19
  -7  -5   5   40.31    2.98
  -7  -5   5   37.64    2.77
   7   5  -5   43.32    2.87
  -7   5   5   37.25    3.13
   7   5  -5   39.45    3.24
  -7   5   5   39.62    2.87
  -6  -5   5   23.27    2.23
   6  -5  -5   24.65    2.04
  -6  -5   5   26.54    1.93
  -6  -5   5   27.85    2.11
  -6   5   5   25.83    1.99
  -6   5   5   27.42    2.23
   6   5  -5   27.82    1.97
   6   5  -5   25.53    2.28
   5  -5  -5    2.30    0.54
  -5  -5   5    2.11    0.43
  -5  -5   5    1.55    0.46
  -5  -5   5    1.53    0.46
  -5  -5   5    1.56    0.53
   5  -5  -5    1.88    0.48
  -5   5   5    1.38    0.39
   5   5  -5    1.85    0.59
  -5   5   5    1.73    0.53
   4  -5  -5   48.85    3.51
  -4  -5   5   49.67    3.77
  -4  -5   5   48.80    3.52
  -4  -5   5   51.23    3.23
  -4  -5   5   41.47    3.45
   4  -5  -5   49.80    3.68
  -4   5   5   57.04    3.73
   4   5  -5   52.84    3.76
  -4   5   5   51.07    3.32
  -3  -5   5   67.25    4.70
  -3  -5   5   71.75    4.32
   3  -5  -5   71.87    4.75
  -3  -5   5   68.95    5.03
   3  -5  -5   72.13    4.93
  -3  -5   5   70.85    4.75
  -3   5   5   65.82    5.02
  -3   5   5   68.41    4.42
   3   5  -5   69.79    4.98
  -2  -5   5    5.44    0.73
   2  -5  -5    4.03    0.65
   2  -5  -5    5.16    0.75
  -2  -5   5    5.99    0.60
  -2  -5   5    5.35    0.75
  -2  -5   5    6.43    0.77
  -2   5   5    4.10    0.72
   2   5  -5    4.59    0.81
  -2   5   5    5.68    0.72
  -1  -5   5   63.05    4.41
  -1  -5   5   60.19    4.17
  -1  -5   5   60.31    3.81
   1  -5  -5   63.71    4.23
   1  -5  -5   58.56    4.52
  -1  -5   5   56.71    4.20
  -1   5   5   61.81    4.50
   1   5  -5   67.40    4.50
  -1   5   5   66.14    3.99
   0  -5  -5   58.89    4.08
   0  -5   5   55.99    3.93
   0  -5   5   56.72    3.78
   0  -5  -5   54.65    3.79
   0  -5   5   55.01    3.73
   0  -5   5   53.17    3.43
   0   5   5   49.24    4.02
   0   5   5   54.80    3.60
   0   5  -5   58.03    4.08
   1  -5   5   11.74    0.95
   1  -5   5   11.51    1.00
  -1  -5  -5   11.78    1.21
  -1  -5  -5   12.03    1.10
   1  -5   5   11.39    1.00
   1  -5   5   10.64    1.04
   1   5   5   12.45    1.08
   1   5   5   11.71    1.15
  -1   5  -5   13.27    1.47
   2  -5   5   28.51    2.21
   2  -5   5   33.98    2.38
  -2  -5  -5   31.88    2.46
   2  -5   5   34.89    2.19
  -2  -5  -5   35.66    2.50
  -2  -5  -5   28.92    2.31
   2   5   5   31.21    2.29
  -2   5  -5   28.17    2.55
   2   5   5   31.49    2.50
   3  -5   5   90.37    5.45
  -3  -5  -5   88.53    6.18
  -3  -5  -5   83.66    5.73
  -3  -5  -5   92.50    6.06
   3  -5   5   82.50    5.60
   3  -5   5   89.71    5.85
   3   5   5   81.80    5.56
   3   5   5   84.36    6.17
  -3   5  -5   84.55    6.20
  -4  -5  -5    0.67    0.33
  -4  -5  -5    0.64    0.33
  -4  -5  -5    0.46    0.39
   4  -5   5    1.40    0.38
   4  -5   5    0.85    0.25
   4  -5   5    0.75    0.32
   4   5   5    0.90    0.42
  -4   5  -5    1.47    0.60
   5  -5   5   20.30    1.73
   5  -5   5   19.65    1.66
  -5  -5  -5   18.19    1.77
  -5  -5  -5   18.57    1.63
  -5  -5  -5   22.25    1.93
  -5  -5  -5   23.81    1.77
  -5   5  -5   18.93    1.98
   5   5   5   20.16    1.77
   6  -5   5   10.66    1.28
  -6  -5  -5   13.78    1.52
   6  -5   5    9.75    1.22
   6   5   5   11.48    1.49
  -6   5  -5   12.04    1.70
   7  -5   5    2.51    0.63
  -7  -5  -5    1.86    0.63
   7  -5   5    2.59    0.65
   7   5   5    1.54    0.61
   8  -5   5   16.63    1.88
  -8  -5  -5   21.73    1.97
   8  -5   5   19.79    1.81
   8   5   5   18.73    2.19
  -8   5  -5   15.73    2.19
  -9  -5  -5   30.67    2.68
   9  -5   5   23.63    2.42
   9  -5   5   33.00    2.51
  -9   5  -5   27.68    2.86
   9   5   5   30.74    2.69
  10  -5   5    3.45    0.90
 -10  -5  -5    4.76    1.12
 -10   5  -5    4.94    1.23
  10   5   5    5.15    1.32
  11  -5   5    2.36    0.84
 -11   5  -5    1.70    0.89
  11   5   5    3.38    1.21
  12  -6  -5   -0.33    0.46
 -12  -6   5    0.25    0.60
  12   6  -5    0.73    0.64
 -12   6   5    0.12    0.64
  12   6  -5   -0.03    0.59
  11  -6  -5    2.42    0.79
 -11  -6   5    1.49    0.75
 -11  -6   5    1.96    0.61
 -11   6   5    1.65    0.68
  11   6  -5    1.26    0.70
  11   6  -5    3.09    1.06
 -10  -6   5    6.88    1.05
 -10  -6   5    9.32    1.47
  10  -6  -5    8.14    1.21
  10   6  -5    6.09    1.30
  10   6  -5    6.99    1.19
 -10   6   5    7.25    1.21
  -9  -6   5   64.12    4.52
   9  -6  -5   67.37    4.69
  -9  -6   5   61.90    5.24
  -9  -6   5   70.42    4.84
   9   6  -5   69.06    5.24
  -9   6   5   70.68    4.69
   9   6  -5   72.06    4.68
  -8  -6   5    0.31    0.34
  -8  -6   5    0.22    0.27
   8  -6  -5    0.41    0.37
  -8   6   5   -0.11    0.30
   8   6  -5    0.35    0.41
   8   6  -5    0.39    0.59
   7  -6  -5    3.68    0.65
  -7  -6   5    4.66    0.69
  -7  -6   5    4.01    0.73
   7   6  -5    4.08    0.90
  -7   6   5    2.51    0.69
   7   6  -5    3.33    0.67
  -7   6   5    4.30    0.76
  -6  -6   5   23.68    1.81
  -6  -6   5   25.20    2.23
   6  -6  -5   25.66    1.98
  -6  -6   5   25.63    2.04
   6   6  -5   27.83    2.25
   6   6  -5   24.11    1.86
  -6   6   5   20.33    2.05
  -6   6   5   25.55    1.93
  -5  -6   5   92.98    5.95
  -5  -6   5  100.73    6.48
   5  -6  -5   94.25    6.42
   5  -6  -5   96.40    6.76
  -5  -6   5   99.40    6.97
  -5  -6   5   96.41    6.51
  -5   6   5   97.44    6.86
   5   6  -5   95.63    6.79
   5   6  -5   91.74    5.98
  -5   6   5   99.27    6.08
  -4  -6   5    7.48    1.04
   4  -6  -5    7.61    0.96
  -4  -6   5    6.05    0.99
   4  -6  -5    9.34    1.09
  -4  -6   5    8.88    0.75
  -4  -6   5    7.59    0.97
   4   6  -5    9.75    1.17
  -4   6   5    7.68    0.91
   3  -6  -5  109.59    7.08
  -3  -6   5  109.49    6.85
   3  -6  -5  102.38    7.27
  -3  -6   5  101.43    6.78
   3  -6  -5   98.62    6.76
  -3  -6   5  105.09    6.23
  -3  -6   5   98.68    7.24
   3   6  -5   99.56    7.11
  -3   6   5  103.39    6.35
  -3   6   5   95.43    7.23
   2  -6  -5   21.47    1.81
  -2  -6   5   22.24    1.92
   2  -6  -5   22.42    1.98
  -2  -6   5   24.38    1.84
  -2  -6   5   20.74    1.54
  -2  -6   5   25.22    1.78
  -2   6   5   21.66    1.69
   2   6  -5   21.76    1.96
  -2   6   5   28.58    1.94
  -1  -6   5   37.18    2.77
   1  -6  -5   35.96    2.98
  -1  -6   5   42.08    2.51
  -1  -6   5   38.28    2.90
  -1  -6   5   37.62    2.75
   1  -6  -5   35.99    2.78
   1   6  -5   41.50    3.02
  -1   6   5   38.48    2.62
  -1   6   5   38.08    3.01
   0  -6  -5   12.25    1.20
   0  -6   5   13.31    1.00
   0  -6   5   12.50    1.17
   0  -6  -5   14.55    1.40
   0  -6   5   13.47    1.20
   0  -6   5   14.25    1.22
   0   6   5   14.75    1.19
   0   6   5   15.30    1.35
   0   6  -5   13.10    1.40
   1  -6   5  299.33   18.56
  -1  -6  -5  306.88   18.35
   1  -6   5  282.99   17.09
   1  -6   5  295.10   18.24
  -1  -6  -5  261.57   19.60
   1  -6   5  293.89   19.39
  -1   6  -5  277.40   19.28
   1   6   5  285.27   19.60
   1   6   5  295.41   17.30
   2  -6   5   30.80    2.27
   2  -6   5   36.23    2.19
  -2  -6  -5   29.70    2.36
   2  -6   5   30.12    2.36
  -2  -6  -5   32.91    2.54
  -2   6  -5   32.76    2.61
   2   6   5   30.50    2.30
   2   6   5   29.92    2.54
  -3  -6  -5    9.28    1.01
   3  -6   5    7.16    0.89
   3  -6   5    7.96    0.72
   3  -6   5    6.28    0.79
  -3  -6  -5    4.38    0.76
  -3  -6  -5    6.33    0.98
  -3   6  -5    5.15    1.00
   3   6   5    6.52    0.95
   3   6   5    7.16    0.96
   4  -6   5   13.32    1.16
   4  -6   5   11.93    1.20
  -4  -6  -5   11.31    1.19
  -4  -6  -5   14.46    1.35
  -4  -6  -5   12.30    1.25
   4   6   5   12.16    1.48
  -4   6  -5   16.55    1.49
  -5  -6  -5   72.20    4.64
  -5  -6  -5   65.54    4.74
  -5  -6  -5   68.66    4.90
   5  -6   5   58.54    4.55
  -5  -6  -5   68.19    4.54
   5  -6   5   60.17    4.27
  -5   6  -5   62.41    4.97
   5   6   5   67.27    4.50
  -6  -6  -5   15.05    1.71
   6  -6   5   11.16    1.35
   6  -6   5   12.01    1.38
   6   6   5   12.24    1.54
  -6   6  -5   13.72    1.76
   7  -6   5   40.01    3.23
   7  -6   5   48.60    3.18
  -7  -6  -5   35.64    3.45
  -7   6  -5   43.78    3.66
   7   6   5   48.52    3.39
   8  -6   5    2.93    0.75
   8  -6   5    3.73    0.82
  -8   6  -5    2.86    0.92
   8   6   5    3.19    0.84
   9  -6   5   10.78    1.46
   9  -6   5   13.99    1.68
   9   6   5   12.52    1.87
  -9   6  -5   18.23    2.34
  10  -6   5    1.00    0.65
  10   6   5   -1.53    0.49
 -10   6  -5    0.95    0.61
 -11   6  -5   22.69    2.97
  12  -7  -5    0.64    0.63
 -12  -7   5    1.41    0.83
  12   7  -5    0.50    0.80
 -12   7   5    0.03    0.65
  11  -7  -5   24.90    2.36
 -11  -7   5   26.32    2.61
 -11   7   5   25.63    2.36
  11   7  -5   26.80    2.38
 -10  -7   5    1.40    0.52
  10  -7  -5    1.88    0.61
 -10  -7   5    0.41    0.53
 -10   7   5    0.32    0.54
  10   7  -5    0.94    0.59
  -9  -7   5    4.46    0.75
   9  -7  -5    4.65    0.90
  -9  -7   5    2.86    0.82
  -9  -7   5    4.09    0.88
   9   7  -5    2.52    0.71
  -9   7   5    3.43    0.81
   9   7  -5    2.37    0.92
   8  -7  -5    3.76    0.78
  -8  -7   5    3.13    0.63
  -8  -7   5    3.20    0.77
  -8  -7   5    2.58    0.77
   8   7  -5    3.55    0.91
  -8   7   5    2.64    0.76
  -8   7   5    2.68    0.66
   8   7  -5    2.44    0.62
  -7  -7   5  125.07    7.33
   7  -7  -5  123.38    7.82
  -7  -7   5  119.31    7.89
  -7  -7   5  123.30    8.45
   7   7  -5  100.78    8.20
  -7   7   5  128.42    7.49
  -7   7   5  117.71    8.38
   7   7  -5  103.10    7.32
  -6  -7   5    0.50    0.29
   6  -7  -5    0.75    0.33
  -6  -7   5    0.76    0.44
   6   7  -5    0.65    0.31
   6   7  -5    0.41    0.53
  -6   7   5    1.10    0.37
  -5  -7   5   29.30    2.36
  -5  -7   5   23.49    1.83
   5  -7  -5   24.15    2.16
   5  -7  -5   25.70    2.09
  -5  -7   5   29.41    2.33
  -5  -7   5   27.30    2.15
   5  -7  -5   25.93    2.24
  -5   7   5   28.03    2.25
  -5   7   5   27.65    1.99
   5   7  -5   23.56    2.21
   4  -7  -5   56.70    4.21
  -4  -7   5   59.57    4.28
   4  -7  -5   60.31    4.55
  -4  -7   5   64.65    3.92
  -4  -7   5   57.72    4.24
   4  -7  -5   62.52    4.41
  -4  -7   5   60.02    4.56
   4   7  -5   63.62    4.47
  -4   7   5   58.18    4.51
  -4   7   5   61.46    3.97
   4   7  -5   61.98    3.85
   3  -7  -5   34.30    2.89
   3  -7  -5   41.10    2.80
  -3  -7   5   37.67    2.74
  -3  -7   5   39.21    2.93
   3  -7  -5   34.71    2.69
  -3  -7   5   36.31    2.71
  -3   7   5   38.60    2.53
   3   7  -5   30.41    2.80
  -3   7   5   35.18    2.89
   2  -7  -5    0.01    0.21
  -2  -7   5    0.15    0.22
   2  -7  -5    0.61    0.29
  -2  -7   5    0.12    0.23
  -2  -7   5    0.10    0.18
   2   7  -5    0.03    0.41
  -2   7   5    0.21    0.22
  -1  -7   5   55.18    3.84
  -1  -7   5   55.91    3.86
   1  -7  -5   57.22    3.90
  -1  -7   5   60.30    4.09
   1  -7  -5   56.70    4.19
  -1   7   5   54.81    3.61
  -1   7   5   51.65    4.13
   1   7  -5   49.44    4.05
   0  -7  -5   30.21    2.48
   0  -7   5   29.23    2.29
   0  -7   5   29.92    2.22
   0  -7  -5   28.26    2.26
   0  -7   5   28.68    2.21
   0   7   5   27.25    2.40
   0   7  -5   32.15    2.49
   0   7   5   30.23    2.12
   1  -7   5    0.55    0.26
  -1  -7  -5    0.49    0.29
   1  -7   5    0.38    0.24
   1  -7   5    0.54    0.26
  -1   7  -5    0.79    0.51
   1   7   5    0.58    0.30
   1   7   5    0.37    0.25
  -2  -7  -5   25.14    2.07
   2  -7   5   19.49    1.72
  -2  -7  -5   21.10    1.78
   2  -7   5   21.12    1.68
   2   7   5   22.25    1.75
  -2   7  -5   19.76    1.95
   2   7   5   24.34    1.98
  -3  -7  -5  111.77    6.60
  -3  -7  -5   97.34    7.03
   3  -7   5   90.53    6.55
   3  -7   5   93.25    6.37
  -3   7  -5  101.36    7.01
   3   7   5   94.07    6.23
  -4  -7  -5   15.89    1.53
   4  -7   5   18.29    1.55
   4   7   5   18.08    1.62
  -4   7  -5   17.37    2.03
  -5  -7  -5   32.52    2.53
  -5  -7  -5   32.97    2.51
  -5  -7  -5   32.77    2.74
   5  -7   5   29.60    2.48
   5   7   5   31.14    2.55
  -5   7  -5   35.19    2.87
   6  -7   5    5.63    0.86
  -6  -7  -5    5.38    1.10
  -6   7  -5    4.97    1.06
   6   7   5    6.59    1.14
   7  -7   5   11.39    1.41
  -7  -7  -5   13.16    1.72
  -7   7  -5   14.11    1.90
   7   7   5   11.43    1.58
   8  -7   5    2.02    0.60
  -8   7  -5    2.82    0.85
   8   7   5    2.66    0.84
   9   7   5   52.13    4.10
  -9   7  -5   51.17    4.46
 -10   7  -5   -0.18    0.58
  10   7   5    0.48    0.82
  12  -8  -5   16.03    2.03
 -12  -8   5   17.74    2.40
 -12   8   5   16.76    2.09
  12   8  -5   16.52    2.28
 -11  -8   5    0.83    0.62
  11  -8  -5    1.30    0.63
 -11   8   5    1.66    0.73
  11   8  -5    0.55    0.67
  10  -8  -5    1.07    0.60
 -10  -8   5   -0.36    0.39
 -10   8   5   -0.28    0.53
   9  -8  -5   43.06    3.15
  -9  -8   5   38.73    3.23
  -9  -8   5   43.52    3.61
  -9   8   5   38.83    3.09
   8  -8  -5   29.80    2.33
  -8  -8   5   28.98    2.44
  -8  -8   5   26.37    2.67
   8  -8  -5   30.99    2.54
  -8   8   5   25.46    2.51
  -8   8   5   29.97    2.32
   7  -8  -5    7.23    1.08
  -7  -8   5    9.20    1.27
   7  -8  -5    9.22    1.24
  -7  -8   5    9.46    1.44
  -7   8   5    8.89    1.30
  -7   8   5    6.91    1.01
   6  -8  -5    8.81    1.20
   6  -8  -5    8.72    1.12
  -6  -8   5    9.10    1.25
   6  -8  -5    8.55    1.18
  -6  -8   5    8.86    1.34
  -6   8   5    7.90    1.06
  -6   8   5    9.02    1.22
   5  -8  -5   17.22    1.61
   5  -8  -5   17.92    1.76
  -5  -8   5   18.08    1.81
  -5  -8   5   17.26    1.66
   5  -8  -5   17.01    1.67
  -5   8   5   19.23    1.55
  -5   8   5   23.18    1.75
   4  -8  -5    1.35    0.45
   4  -8  -5    2.14    0.55
   4  -8  -5    1.91    0.51
  -4  -8   5    1.81    0.52
  -4  -8   5    2.13    0.61
  -4  -8   5    1.21    0.41
  -4   8   5    1.31    0.50
  -4   8   5    1.15    0.39
  -3  -8   5   46.18    3.87
  -3  -8   5   49.08    3.66
   3  -8  -5   50.07    3.67
  -3  -8   5   53.44    3.68
   3  -8  -5   49.69    3.93
  -3   8   5   49.66    3.38
   3   8  -5   51.10    3.83
  -3   8   5   59.87    3.92
   2  -8  -5   24.42    1.95
  -2  -8   5   23.30    2.02
  -2  -8   5   20.25    1.85
   2  -8  -5   24.79    2.12
  -2  -8   5   25.99    1.93
  -2   8   5   21.22    2.04
  -2   8   5   27.56    1.80
   2   8  -5   20.08    1.99
  -1  -8   5    7.25    0.94
  -1  -8   5    7.26    0.99
   1  -8  -5    8.62    1.13
  -1  -8   5    7.01    0.91
   1  -8  -5    5.53    0.90
  -1   8   5   10.16    0.88
  -1   8   5    7.99    0.92
   1   8  -5    6.30    1.04
   0  -8   5    0.89    0.32
   0  -8   5    1.13    0.40
   0  -8   5    0.76    0.30
   0  -8  -5    0.60    0.38
   0  -8  -5    1.18    0.39
   0   8   5    0.68    0.32
   0   8  -5    0.84    0.52
   0   8   5    0.97    0.42
   1  -8   5  122.50    8.58
  -1  -8  -5  119.53    8.20
   1  -8   5  121.64    8.22
  -1  -8  -5  128.05    8.82
   1  -8   5  115.61    8.09
   1   8   5  126.82    8.84
  -1   8  -5  129.26    8.65
   1   8   5  133.10    7.76
   2  -8   5    7.97    0.94
   2  -8   5    8.03    0.96
  -2  -8  -5    6.62    0.98
   2   8   5    8.70    1.06
  -2   8  -5    7.63    1.16
   2   8   5    7.24    1.12
  -3  -8  -5   13.60    1.38
   3  -8   5   14.64    1.25
   3  -8   5   13.99    1.30
  -3   8  -5   14.58    1.75
   3   8   5   14.67    1.53
  -4  -8  -5    7.86    1.21
  -4  -8  -5    7.86    1.06
   4  -8   5    7.21    1.00
   4   8   5    8.28    1.16
  -4   8  -5    9.12    1.32
   5  -8   5   48.03    3.53
  -5  -8  -5   43.32    3.50
  -5  -8  -5   50.84    3.79
  -5  -8  -5   47.83    3.50
  -5   8  -5   48.22    3.91
   5   8   5   48.69    3.50
   6  -8   5    5.36    0.89
  -6  -8  -5    7.32    1.26
  -6   8  -5    7.28    1.30
   6   8   5    7.14    1.19
  -7  -8  -5   15.90    1.89
   7  -8   5   12.05    1.51
   7   8   5    9.94    1.49
  -7   8  -5   14.18    1.97
   8  -8   5    5.19    0.96
  -8  -8  -5    7.00    1.25
  -8   8  -5    8.30    1.50
   8   8   5    7.96    1.35
   9   8   5    8.25    1.53
  -9   8  -5    8.11    1.51
 -10   8  -5   11.41    1.97
  10   8   5    8.38    1.72
  11  -9  -5    0.00    0.54
 -11  -9   5   -0.22    0.52
 -11   9   5    0.20    0.61
 -10  -9   5   11.23    1.78
  10  -9  -5   13.89    1.66
 -10   9   5    8.29    1.38
   9  -9  -5    0.50    0.49
  -9  -9   5    0.27    0.52
  -9   9   5    0.36    0.50
  -8  -9   5   42.54    3.64
  -8  -9   5   42.91    3.32
   8  -9  -5   45.63    3.15
  -8   9   5   35.85    2.99
  -7  -9   5   10.76    1.47
   7  -9  -5   12.24    1.50
  -7  -9   5   13.15    1.68
   7  -9  -5    9.89    1.31
  -7   9   5    9.27    1.23
  -7   9   5   12.64    1.54
   6  -9  -5    1.89    0.57
   6  -9  -5    2.74    0.62
   6  -9  -5    1.49    0.52
  -6  -9   5    1.40    0.56
  -6  -9   5    1.93    0.65
  -6   9   5    2.02    0.54
  -6   9   5    1.44    0.62
  -5  -9   5    8.18    1.26
  -5  -9   5    9.74    1.26
   5  -9  -5    8.59    1.15
   5  -9  -5    9.13    1.23
  -5   9   5   10.62    1.27
  -5   9   5    7.54    1.00
  -4  -9   5   99.33    7.24
   4  -9  -5   93.39    6.71
   4  -9  -5   99.65    7.22
  -4  -9   5   96.13    6.76
  -4  -9   5  104.39    6.79
  -4   9   5  107.14    7.15
  -4   9   5   96.99    6.25
  -3  -9   5    2.97    0.62
   3  -9  -5    3.52    0.72
  -3  -9   5    2.61    0.64
   3  -9  -5    3.84    0.80
  -3  -9   5    3.64    0.71
  -3   9   5    4.18    0.63
   2  -9  -5   13.22    1.59
  -2  -9   5   12.30    1.24
  -2  -9   5   14.29    1.33
   2  -9  -5   13.66    1.34
  -2  -9   5   13.80    1.37
  -2   9   5   13.58    1.45
  -2   9   5   11.92    1.14
   1  -9  -5   23.52    1.96
  -1  -9   5   22.78    2.00
   1  -9  -5   23.60    2.14
  -1  -9   5   21.64    1.89
  -1  -9   5   23.50    1.90
  -1   9   5   25.08    1.79
   0  -9   5  105.05    6.96
   0  -9  -5   89.05    6.59
   0  -9   5   98.58    6.63
   0  -9  -5  100.54    7.16
   0  -9   5   96.69    6.55
   0   9   5  102.70    6.20
   0   9  -5   96.01    6.91
   0   9   5   95.53    7.12
  -1  -9  -5    0.35    0.30
   1  -9   5    0.63    0.32
  -1  -9  -5    0.73    0.37
   1  -9   5    0.26    0.25
   1  -9   5    0.60    0.28
   1   9   5    0.20    0.30
   1   9   5    0.34    0.30
  -1   9  -5    0.31    0.49
  -2  -9  -5   75.68    5.31
   2  -9   5   78.60    5.17
  -2  -9  -5   75.25    5.65
   2  -9   5   75.34    5.23
   2   9   5   79.51    4.98
  -2   9  -5   69.84    5.54
   2   9   5   79.05    5.75
   3  -9   5   33.51    2.53
  -3  -9  -5   35.59    2.75
   3  -9   5   33.92    2.61
  -3  -9  -5   32.54    2.94
   3   9   5   35.80    2.60
  -3   9  -5   35.17    2.93
  -4  -9  -5   21.30    1.94
  -4  -9  -5   18.18    1.71
   4  -9   5   17.77    1.66
  -4  -9  -5   19.68    1.78
   4   9   5   20.31    1.77
  -4   9  -5   22.71    2.06
   5  -9   5    3.89    0.73
  -5  -9  -5    5.58    0.87
  -5  -9  -5    4.39    0.81
  -5   9  -5    4.86    1.02
   5   9   5    5.34    0.92
   6  -9   5   62.23    4.31
  -6  -9  -5   54.29    4.64
  -6   9  -5   53.18    4.64
   6   9   5   65.07    4.32
   7  -9   5    2.96    0.68
  -7  -9  -5    3.20    0.88
   7   9   5    3.56    1.01
  -7   9  -5    4.91    1.05
  -8  -9  -5   -0.03    0.47
  -8   9  -5   -0.02    0.40
   8   9   5   -0.35    0.46
  -9   9  -5    4.35    1.25
   9   9   5    7.35    1.44
 -11 -10   5    0.75    0.62
 -10 -10   5    1.16    0.62
  -9 -10   5    0.54    0.56
  -8 -10   5   45.19    3.93
  -7 -10   5    0.79    0.58
   7 -10  -5    0.09    0.39
   7 -10  -5    0.88    0.44
  -7  10   5    1.07    0.61
   6 -10  -5   25.09    2.23
   6 -10  -5   23.71    2.04
  -6 -10   5   22.08    2.09
  -6 -10   5   25.06    2.36
  -6  10   5   22.45    2.22
   5 -10  -5    0.06    0.32
  -4 -10   5    2.41    0.68
   4 -10  -5    1.74    0.59
  -4 -10   5    2.62    0.62
  -4 -10   5    2.18    0.56
   4 -10  -5    2.59    0.66
  -4  10   5    3.19    0.61
   3 -10  -5    0.57    0.34
  -3 -10   5    1.32    0.48
  -3 -10   5    0.69    0.38
  -3 -10   5    0.78    0.41
   3 -10  -5    1.97    0.58
  -3  10   5    0.37    0.36
  -2 -10   5   22.60    2.04
   2 -10  -5   25.99    2.15
  -2 -10   5   23.41    2.08
  -2 -10   5   27.34    2.26
   2 -10  -5   23.28    2.26
  -2  10   5   30.63    2.32
  -1 -10   5   -0.02    0.20
   1 -10  -5    0.24    0.28
  -1 -10   5    0.08    0.26
   1 -10  -5   -0.05    0.26
  -1 -10   5   -0.29    0.18
  -1  10   5    0.25    0.33
   0 -10  -5    4.78    0.95
   0 -10   5    5.04    0.77
   0 -10  -5    4.75    0.88
   0 -10   5    5.56    0.85
   0 -10   5    4.49    0.79
   0  10   5    5.14    0.99
  -1 -10  -5    3.45    0.76
   1 -10   5    3.30    0.65
   1 -10   5    2.71    0.56
  -1 -10  -5    2.68    0.69
   1  10   5    3.21    0.76
   2 -10   5    2.59    0.56
  -2 -10  -5    3.41    0.79
   2 -10   5    3.33    0.62
   2  10   5    3.62    0.69
   3 -10   5   -0.03    0.21
  -3 -10  -5    0.16    0.37
   3 -10   5    0.29    0.29
  -3 -10  -5    0.28    0.45
  -3  10  -5    0.30    0.47
   3  10   5   -0.35    0.28
  -4 -10  -5   48.12    3.43
  -4 -10  -5   44.86    3.77
   4 -10   5   47.48    3.38
  -4 -10  -5   48.14    3.48
   4  10   5   38.20    3.21
  -4  10  -5   43.92    3.70
   5 -10   5    1.89    0.53
  -5 -10  -5    0.55    0.50
  -5 -10  -5    1.68    0.58
  -5 -10  -5    1.04    0.48
   5  10   5    1.43    0.59
  -5  10  -5    1.64    0.70
   6 -10   5   10.04    1.32
  -6 -10  -5   12.67    1.76
   6  10   5    8.29    1.37
  -6  10  -5   12.31    1.86
  -7 -10  -5    2.22    0.76
  -7  10  -5    1.20    0.76
   7  10   5    0.84    0.63
  -8 -10  -5   27.80    2.64
  -8  10  -5   28.10    2.74
   8  10   5   19.08    2.48
   9  10   5    1.26    0.94
  -9  10  -5    2.15    0.95
 -10 -11   5    9.92    1.79
  -9 -11   5    0.19    0.49
  -8 -11   5   27.16    2.73
  -7 -11   5   10.85    1.66
  -7  11   5    9.21    1.45
   6 -11  -5    5.14    0.89
  -6 -11   5    5.16    1.06
   6 -11  -5    3.95    0.88
   5 -11  -5    1.24    0.51
   5 -11  -5    0.40    0.37
  -5 -11   5    0.09    0.40
  -4 -11   5   50.39    3.82
   4 -11  -5   52.33    4.09
   4 -11  -5   50.34    3.80
  -4 -11   5   46.33    3.75
  -4  11   5   55.99    4.08
  -3 -11   5    7.07    1.00
   3 -11  -5    4.26    0.86
   3 -11  -5    5.64    1.05
  -3 -11   5    7.90    1.16
  -3 -11   5    8.79    1.21
  -3  11   5    6.31    1.18
  -2 -11   5    4.96    0.82
   2 -11  -5    4.92    0.97
  -2 -11   5    6.44    1.00
  -2 -11   5    4.54    0.86
   2 -11  -5    4.13    0.81
  -1 -11   5   12.90    1.31
  -1 -11   5   10.41    1.34
  -1 -11   5   11.02    1.29
   1 -11  -5   12.88    1.65
   1 -11  -5   10.45    1.41
  -1  11   5   10.87    1.53
   0 -11   5   63.81    4.70
   0 -11  -5   69.40    4.98
   0 -11   5   66.96    4.51
   0 -11   5   65.56    4.49
   0 -11  -5   50.70    4.45
  -1 -11  -5    0.76    0.49
   1 -11   5    0.52    0.31
  -1 -11  -5    0.11    0.34
   1 -11   5    0.11    0.28
   2 -11   5   70.76    4.81
  -2 -11  -5   66.16    4.95
   2 -11   5   70.99    4.86
  -2 -11  -5   66.56    5.34
   3 -11   5    8.55    1.02
  -3 -11  -5    5.01    0.88
  -3 -11  -5    9.42    1.30
  -3 -11  -5    7.59    1.32
   4 -11   5    5.44    0.86
  -4 -11  -5    5.11    0.87
  -4 -11  -5    5.76    1.02
  -4 -11  -5    4.75    1.02
  -5 -11  -5    3.70    0.95
  -5 -11  -5    3.06    0.71
   5 -11   5    4.73    0.79
  -6 -11  -5   39.07    3.63
   6 -11   5   42.58    3.28
  -6  11  -5   42.64    3.68
  -7 -11  -5    5.41    1.16
  -7  11  -5    3.52    1.02
  -8 -11  -5    0.69    0.63
  -8  11  -5    1.20    0.76
  -9 -12   5   18.20    2.51
  -8 -12   5   11.16    1.80
  -7 -12   5    5.49    1.27
  -6 -12   5    5.30    1.12
   6 -12  -5    5.08    1.03
  -6  12   5    5.81    1.13
  -5 -12   5   26.47    2.43
   5 -12  -5   22.26    2.23
  -5  12   5   22.86    2.27
  -4 -12   5    7.55    1.14
  -4 -12   5    8.68    1.32
   4 -12  -5    8.06    1.31
  -4  12   5    9.20    1.39
  -3 -12   5   45.47    3.55
   3 -12  -5   44.85    3.82
  -3 -12   5   50.87    3.88
  -3  12   5   47.46    3.88
   2 -12  -5    0.53    0.51
  -2 -12   5    1.98    0.52
  -2 -12   5    1.87    0.60
  -2  12   5    1.49    0.65
  -1 -12   5   17.04    1.71
  -1 -12   5   17.92    1.64
  -1 -12   5   15.00    1.80
   1 -12  -5   18.62    1.87
  -1  12   5   18.69    1.94
   0 -12   5    2.09    0.60
   0 -12  -5    0.94    0.52
   0 -12   5    0.82    0.39
   0 -12   5    2.09    0.55
   1 -12   5   67.71    4.62
   1 -12   5   63.87    4.59
  -1 -12  -5   60.89    5.04
  -2 -12  -5    0.78    0.38
   2 -12   5    1.01    0.46
  -2 -12  -5    0.87    0.53
   2 -12   5    0.74    0.36
   3 -12   5    2.10    0.53
  -3 -12  -5    1.11    0.45
  -3 -12  -5    1.88    0.74
  -4 -12  -5    5.06    1.07
  -4 -12  -5    5.73    0.96
   4 -12   5    3.12    0.69
   5 -12   5   32.20    2.63
  -5 -12  -5   28.70    2.58
  -5 -12  -5   31.97    3.00
  -6 -12  -5    5.35    1.24
  -7 -12  -5    9.67    1.61
  -8 -13   5    2.41    0.98
  -7 -13   5   27.31    2.80
  -6 -13   5   -0.03    0.47
   6 -13  -5    2.39    0.76
  -6  13   5    1.79    0.68
   5 -13  -5    8.45    1.38
  -5 -13   5    8.29    1.39
  -5  13   5   10.30    1.52
   4 -13  -5    3.90    0.95
  -4 -13   5    3.93    0.96
  -4 -13   5    2.67    0.73
  -4  13   5    4.00    0.99
   3 -13  -5   29.72    2.69
  -3 -13   5   28.47    2.65
  -3 -13   5   29.66    2.47
  -3  13   5   28.19    2.70
  -2 -13   5    3.66    0.76
  -2 -13   5    4.97    0.96
   2 -13  -5    4.89    1.02
  -2  13   5    4.29    1.02
   1 -13  -5   36.26    3.18
  -1 -13   5   34.70    2.99
  -1 -13   5   35.70    2.84
   0 -13  -5    4.94    1.07
   0 -13   5    5.98    0.94
   1 -13   5    0.31    0.29
  -1 -13  -5    0.02    0.41
  -2 -13  -5    1.32    0.46
   2 -13   5    0.41    0.35
  -2 -13  -5    2.24    0.78
  -3 -13  -5   39.58    3.47
   3 -13   5   38.46    3.02
  -3 -13  -5   38.50    3.04
  -4 -13  -5    3.09    0.75
  -4 -13  -5    2.71    0.92
  -5 -13  -5   12.60    1.89
  -5 -13  -5   10.77    1.42
  -6 -13  -5    0.70    0.61
  -7 -14   5    9.60    1.72
  -6 -14   5    8.27    1.51
  -5 -14   5   21.08    2.24
   5 -14  -5   21.10    2.20
  -5  14   5   20.64    2.24
   4 -14  -5   -0.05    0.38
  -4 -14   5    0.08    0.48
  -4  14   5    0.10    0.56
  -3 -14   5   36.88    3.18
  -3 -14   5   32.48    2.88
   3 -14  -5   36.70    3.20
  -3  14   5   36.76    3.29
   2 -14  -5   15.17    2.01
  -2 -14   5   13.17    1.77
  -2 -14   5   16.07    1.78
  -1 -14   5    2.72    0.71
  -1 -14   5    4.91    0.97
   1 -14  -5    3.78    0.95
   0 -14  -5    0.40    0.45
   0 -14   5    0.76    0.45
   1 -14   5   75.75    5.54
  -1 -14  -5   76.44    6.12
  -1 -14  -5   81.41    5.57
  -2 -14  -5    6.20    1.22
  -3 -14  -5    2.50    0.87
  -4 -14  -5    8.08    1.54
  -5 -14  -5   30.79    3.09
  -6 -15   5    1.97    0.84
  -5 -15   5    3.04    0.91
   5 -15  -5    0.94    0.56
  -4 -15   5   13.32    1.90
   4 -15  -5   13.11    1.83
   3 -15  -5    0.97    0.61
  -3 -15   5    1.36    0.64
  -3 -15   5    1.89    0.63
  -2 -15   5    0.95    0.53
  -2 -15   5    0.58    0.49
   2 -15  -5    1.76    0.76
   1 -15  -5    5.27    1.18
   0 -15  -5    3.68    0.99
  -1 -15  -5    0.83    0.57
  -2 -15  -5   10.88    1.78
  -3 -15  -5    4.14    1.10
  -4 -15  -5   -0.33    0.49
   4 -16  -5    0.92    0.70
  -4 -16   5    1.01    0.70
   3 -16  -5    6.69    1.36
  -3 -16   5    6.65    1.31
   2 -16  -5   21.65    2.60
  -2 -16   5   16.84    2.20
   1 -16  -5   -0.14    0.52
   0 -16  -5   11.21    1.82
  -1 -16  -5   12.50    1.91
  -2 -16  -5   11.36    1.88
 -13   0   6    0.00    0.43
  13   0  -6   -0.27    0.67
 -12   0   6   27.22    2.72
  12   0  -6   24.78    2.69
 -12   0   6   21.82    2.16
  11   0  -6    0.05    0.52
 -11   0   6    1.06    0.45
 -11   0   6   -0.34    0.32
  10   0  -6   78.02    5.89
 -10   0   6   95.42    6.61
 -10   0   6   91.68    5.94
   9   0  -6   -0.15    0.28
  -9   0   6   -0.08    0.30
  -9   0   6    0.83    0.45
  -9   0   6    0.12    0.30
  -8   0   6    0.70    0.35
   8   0  -6    1.35    0.59
  -8   0   6    0.33    0.36
  -8   0   6    0.33    0.33
   7   0  -6   -0.06    0.36
  -7   0   6    0.34    0.25
  -7   0   6    0.15    0.25
  -6   0   6  102.94    6.70
   6   0  -6  102.68    7.18
  -6   0   6   99.74    6.37
  -6   0   6   99.04    7.22
  -5   0   6   -0.20    0.17
  -5   0   6   -0.15    0.17
   5   0  -6   -0.04    0.13
  -4   0   6  212.56   13.82
   4   0  -6  213.95   14.62
  -4   0   6  213.50   13.05
  -4   0   6  210.13   14.79
   4   0  -6  234.13   13.93
  -3   0   6   -0.08    0.20
  -3   0   6   -0.12    0.15
   3   0  -6    0.09    0.14
   3   0  -6    0.06    0.23
  -3   0   6   -0.20    0.15
   2   0  -6    1.38    0.42
  -2   0   6    1.25    0.34
  -2   0   6    2.04    0.42
  -2   0   6    0.65    0.28
  -1   0   6    0.13    0.19
  -1   0   6    0.11    0.19
   1   0  -6    0.01    0.22
  -1   0   6    0.05    0.19
  -1   0   6   -0.29    0.24
   0   0   6  241.74   15.05
   0   0   6  245.41   15.87
   0   0   6  239.71   16.12
   0   0  -6  269.64   16.85
   0   0   6  261.80   16.95
   1   0   6   -0.11    0.27
   1   0   6   -0.01    0.18
  -1   0  -6   -0.07    0.22
   1   0   6   -0.01    0.15
   2   0   6   21.96    1.83
  -2   0  -6   23.98    2.11
   2   0   6   24.62    1.88
   2   0   6   27.69    2.00
  -3   0  -6   -0.02    0.21
  -3   0  -6   -0.16    0.28
   3   0   6   -0.09    0.13
   3   0   6   -0.27    0.18
   4   0   6   58.23    4.00
  -4   0  -6   54.75    3.69
   4   0   6   54.33    3.77
  -4   0  -6   53.97    4.20
  -5   0  -6    0.22    0.32
   5   0   6    0.05    0.30
  -6   0  -6   73.65    5.62
   6   0   6   76.05    5.08
  -7   0  -6    0.43    0.45
   7   0   6    0.15    0.38
  -8   0  -6    1.67    0.64
   8   0   6    0.99    0.59
   9   0   6   -0.02    0.43
  -9   0  -6    0.04    0.45
 -10   0  -6   42.07    3.93
  10   0   6   46.32    3.63
 -11   0  -6   -0.52    0.49
  11   0   6    0.21    0.64
 -13  -1   6    1.93    0.75
  13  -1  -6    0.98    0.62
  13   1  -6    0.03    0.70
 -13   1   6    0.70    0.74
 -12  -1   6    6.54    1.26
 -12  -1   6    7.15    1.22
  12  -1  -6    6.86    1.29
 -12   1   6    9.53    1.46
  12   1  -6    7.86    1.42
 -11  -1   6   11.46    1.56
  11  -1  -6   10.75    1.54
 -11  -1   6   12.49    1.68
 -11   1   6   10.70    1.48
 -11   1   6    9.66    1.53
  11   1  -6   10.62    1.52
  10  -1  -6    1.93    0.65
 -10  -1   6    0.53    0.43
 -10   1   6    1.17    0.60
  10   1  -6    1.40    0.57
 -10   1   6    3.31    0.90
  -9  -1   6   45.90    3.44
  -9  -1   6   45.30    3.46
  -9  -1   6   52.78    3.89
   9  -1  -6   49.37    3.53
  -9   1   6   45.94    3.84
  -9   1   6   51.40    3.51
   9   1  -6   48.48    3.51
  -8  -1   6   32.32    2.74
   8  -1  -6   28.50    2.71
  -8  -1   6   30.18    2.39
  -8  -1   6   31.85    2.45
   8   1  -6   33.09    2.81
  -8   1   6   32.59    2.42
  -8   1   6   32.30    2.41
   8   1  -6   28.81    2.42
  -8   1   6   33.80    2.73
   7  -1  -6   20.63    2.02
  -7  -1   6   29.57    2.03
  -7  -1   6   25.53    1.86
  -7  -1   6   21.05    1.81
   7   1  -6   19.05    1.99
  -7   1   6   20.69    1.78
  -7   1   6   19.39    1.96
  -7   1   6   21.52    1.78
  -6  -1   6   64.35    4.05
   6  -1  -6   57.64    4.31
  -6  -1   6   59.11    4.34
  -6  -1   6   55.96    3.79
  -6   1   6   55.51    3.81
  -6   1   6   55.08    4.29
  -6   1   6   58.49    3.98
   6   1  -6   51.64    4.26
  -5  -1   6   73.32    4.74
  -5  -1   6   69.08    4.44
   5  -1  -6   68.92    4.53
  -5  -1   6   62.01    5.01
   5  -1  -6   75.94    5.08
  -5   1   6   67.89    4.46
  -5   1   6   70.07    4.68
   5   1  -6   63.37    5.00
  -5   1   6   72.22    5.03
  -4  -1   6    0.73    0.30
  -4  -1   6    1.02    0.35
   4  -1  -6    0.70    0.19
  -4  -1   6    0.88    0.29
   4  -1  -6    0.77    0.36
  -4   1   6    0.69    0.35
   4   1  -6    0.91    0.44
  -4   1   6    1.41    0.37
  -4   1   6    0.61    0.26
  -3  -1   6   -0.14    0.14
  -3  -1   6   -0.26    0.25
   3  -1  -6   -0.03    0.21
   3  -1  -6   -0.10    0.12
  -3  -1   6   -0.42    0.19
  -3  -1   6    0.15    0.19
  -3   1   6   -0.18    0.15
  -3   1   6    0.14    0.22
   3   1  -6   -0.04    0.31
  -3   1   6   -0.13    0.19
   2  -1  -6  361.61   23.97
   2  -1  -6  396.50   23.08
  -2  -1   6  392.26   24.37
  -2  -1   6  351.11   22.80
  -2  -1   6  354.63   21.47
  -2   1   6  351.54   24.36
  -2   1   6  392.51   22.82
   2   1  -6  306.64   23.93
  -2   1   6  353.00   21.50
  -1  -1   6   66.03    4.63
   1  -1  -6   72.90    4.93
  -1  -1   6   71.68    4.36
  -1  -1   6   73.76    4.60
  -1  -1   6   68.70    4.85
  -1   1   6   64.60    4.36
  -1   1   6   66.10    4.86
   1   1  -6   66.96    4.91
   0  -1   6   62.60    4.13
   0  -1   6   70.51    4.45
   0  -1   6   62.74    4.54
   0  -1  -6   65.11    4.66
   0  -1   6   66.62    4.30
   0   1   6   65.91    4.58
   0   1   6   59.68    4.14
   0   1  -6   62.76    4.69
   1  -1   6    3.49    0.62
   1  -1   6    4.89    0.59
   1  -1   6    4.55    0.68
   1  -1   6    4.36    0.55
  -1  -1  -6    5.15    0.79
   1   1   6    3.70    0.64
   1   1   6    4.83    0.62
  -1   1  -6    4.17    0.78
   2  -1   6  300.49   20.15
   2  -1   6  299.97   20.62
  -2  -1  -6  325.62   21.43
  -2  -1  -6  269.31   21.57
   2  -1   6  352.98   21.52
   2  -1   6  301.06   19.18
   2   1   6  369.62   21.62
   2   1   6  322.09   19.24
  -2   1  -6  354.70   21.52
  -3  -1  -6    0.03    0.24
   3  -1   6    0.28    0.29
  -3  -1  -6    1.03    0.30
  -3  -1  -6    1.05    0.40
   3   1   6    0.63    0.37
  -3   1  -6    0.44    0.32
   3   1   6    0.88    0.27
   4  -1   6  180.77   10.64
  -4  -1  -6  158.52   11.73
  -4  -1  -6  158.99   10.95
   4  -1   6  183.97   11.39
  -4  -1  -6  172.27   11.82
   4   1   6  161.34   10.62
   4   1   6  180.74   11.72
  -4   1  -6  188.59   11.92
  -5  -1  -6    5.54    1.04
   5  -1   6    6.28    0.94
   5  -1   6    8.78    1.13
  -5   1  -6    6.84    1.14
   5   1   6    7.09    1.03
   6  -1   6   26.04    2.26
   6  -1   6   27.14    2.33
  -6  -1  -6   29.50    2.56
   6   1   6   29.42    2.33
  -6   1  -6   28.08    2.57
   7  -1   6    7.63    1.14
   7  -1   6    5.58    0.99
  -7  -1  -6    4.12    1.00
  -7   1  -6    6.36    1.20
   7   1   6    7.76    1.20
  -8  -1  -6  103.92    7.51
   8  -1   6   90.76    6.69
  -8   1  -6   95.29    7.48
   8   1   6  117.13    6.93
  -9  -1  -6    4.61    1.13
   9  -1   6    6.03    1.15
   9   1   6    3.18    0.90
  -9   1  -6    4.92    1.23
  10  -1   6    0.95    0.60
 -10  -1  -6    0.17    0.51
  10   1   6    0.38    0.60
 -10   1  -6    1.09    0.66
 -11  -1  -6   18.67    2.44
  11  -1   6   16.96    2.20
  11   1   6   12.02    1.91
 -11   1  -6   13.20    2.19
 -13  -2   6   16.60    2.01
  13  -2  -6   21.21    2.39
 -13   2   6   13.55    1.94
  13   2  -6   15.87    2.19
  12  -2  -6    2.11    0.82
 -12  -2   6    1.40    0.68
 -12  -2   6    0.26    0.49
  12   2  -6    1.18    0.77
 -12   2   6    1.40    0.73
 -11  -2   6   20.91    2.27
 -11  -2   6   11.98    1.61
  11  -2  -6   11.71    1.68
 -11   2   6   15.01    1.95
  11   2  -6   18.21    2.27
 -11   2   6   13.88    1.75
  11   2  -6   16.33    2.00
  10  -2  -6   30.71    2.59
 -10  -2   6   34.43    2.60
 -10  -2   6   32.89    2.78
 -10   2   6   28.51    2.54
 -10   2   6   31.78    2.84
  10   2  -6   31.56    2.59
  10   2  -6   31.51    2.93
   9  -2  -6   31.35    2.49
  -9  -2   6   28.16    2.37
  -9  -2   6   29.93    2.41
   9   2  -6   30.97    2.78
   9   2  -6   31.04    2.46
  -9   2   6   31.89    2.71
  -9   2   6   29.96    2.41
  -8  -2   6    3.03    0.65
  -8  -2   6    3.50    0.68
  -8   2   6    3.50    0.71
   8   2  -6    2.02    0.54
   8   2  -6    3.17    0.82
  -7  -2   6  125.12    7.56
  -7  -2   6  118.41    8.15
  -7  -2   6  112.50    7.15
   7  -2  -6  104.38    7.98
  -7   2   6  108.12    8.06
  -7   2   6  114.97    7.19
   7   2  -6  110.24    8.03
  -6  -2   6   52.35    3.66
   6  -2  -6   53.17    3.57
  -6  -2   6   64.89    4.16
  -6  -2   6   53.15    3.86
   6  -2  -6   52.48    4.15
  -6   2   6   61.55    4.14
  -6   2   6   53.94    3.71
   6   2  -6   51.43    4.16
   5  -2  -6    0.72    0.13
   5  -2  -6    0.35    0.32
  -5  -2   6    1.58    0.44
  -5  -2   6    0.66    0.28
  -5  -2   6    0.64    0.36
  -5   2   6    0.39    0.26
  -5   2   6    0.69    0.32
  -4  -2   6   25.40    1.82
   4  -2  -6   22.67    1.54
  -4  -2   6   20.86    1.65
  -4  -2   6   22.95    1.92
  -4  -2   6   18.73    1.67
   4  -2  -6   21.68    1.91
  -4   2   6   28.45    1.92
  -4   2   6   20.94    1.67
   4   2  -6   25.25    2.04
  -3  -2   6  220.52   13.34
  -3  -2   6  227.84   15.19
  -3  -2   6  225.47   14.21
  -3  -2   6  214.26   14.31
   3  -2  -6  240.89   14.99
   3  -2  -6  232.45   14.21
  -3   2   6  222.43   13.41
  -3   2   6  219.42   15.17
   3   2  -6  205.30   14.94
  -2  -2   6    4.04    0.62
  -2  -2   6    3.08    0.52
   2  -2  -6    4.22    0.49
  -2  -2   6    4.17    0.63
  -2  -2   6    4.55    0.65
   2  -2  -6    4.33    0.72
  -2   2   6    2.97    0.55
   2   2  -6    5.16    0.84
  -2   2   6    4.37    0.61
  -1  -2   6   39.39    2.86
  -1  -2   6   40.84    2.59
   1  -2  -6   43.30    2.72
  -1  -2   6   37.50    2.70
  -1  -2   6   40.95    2.79
   1  -2  -6   35.18    2.89
  -1   2   6   35.34    2.59
   1   2  -6   35.53    2.96
  -1   2   6   37.21    2.88
   0  -2   6   14.40    1.23
   0  -2   6   15.50    1.28
   0  -2  -6   14.01    1.38
   0  -2   6   17.51    1.38
   0  -2   6   15.04    1.23
   0   2   6   15.61    1.34
   0   2   6   15.65    1.30
   0   2  -6   15.75    1.51
   1  -2   6   89.62    5.98
  -1  -2  -6   84.29    6.10
   1  -2   6   89.13    5.67
   1  -2   6   85.95    5.85
  -1  -2  -6   90.13    6.14
  -1  -2  -6   87.12    5.73
   1  -2   6   82.29    5.44
   1   2   6   89.92    6.09
   1   2   6   84.74    5.51
  -1   2  -6   82.69    6.17
  -2  -2  -6    6.95    1.02
  -2  -2  -6    6.50    0.82
  -2  -2  -6    6.26    0.87
   2  -2   6    7.08    0.68
   2  -2   6    8.49    0.97
   2  -2   6    7.20    0.90
   2  -2   6    6.20    0.66
   2   2   6    7.77    0.95
  -2   2  -6    7.86    1.12
   2   2   6    7.76    0.90
   3  -2   6  105.96    6.89
   3  -2   6  118.57    7.27
  -3  -2  -6  107.65    7.57
  -3  -2  -6  113.95    7.02
   3  -2   6  112.93    6.79
  -3  -2  -6  103.13    7.51
   3   2   6  104.27    6.85
   3   2   6  107.14    7.46
  -3   2  -6   94.89    7.56
   4  -2   6    3.70    0.67
  -4  -2  -6    3.21    0.51
  -4  -2  -6    3.76    0.77
   4  -2   6    3.21    0.62
  -4   2  -6    1.73    0.57
   4   2   6    3.00    0.54
   4   2   6    5.21    0.80
  -5  -2  -6    5.07    0.97
   5  -2   6    6.36    0.94
   5  -2   6    6.36    0.96
  -5   2  -6    5.01    1.01
   5   2   6    5.69    0.93
   6  -2   6   61.73    4.41
  -6  -2  -6   66.30    4.92
   6  -2   6   60.55    4.62
   6   2   6   62.99    4.48
  -6   2  -6   71.79    5.07
   7  -2   6   37.94    2.95
  -7  -2  -6   35.24    3.19
   7  -2   6   41.58    3.10
  -7   2  -6   36.67    3.31
   7   2   6   39.31    3.03
  -8  -2  -6    3.38    0.87
   8  -2   6    6.30    1.06
   8  -2   6    4.58    0.94
  -8   2  -6    2.77    0.90
   8   2   6    3.66    0.88
  -9  -2  -6   27.88    2.65
   9  -2   6   22.67    2.29
   9   2   6   25.72    2.43
  -9   2  -6   29.00    2.78
  10  -2   6   17.39    2.15
 -10  -2  -6   17.01    2.28
  10   2   6   15.21    2.08
 -10   2  -6   17.87    2.47
  11  -2   6    5.27    1.21
 -11  -2  -6    5.15    1.28
 -11   2  -6    1.79    0.90
  11   2   6    4.12    1.11
  13  -3  -6    2.61    0.86
 -13  -3   6    2.04    0.80
 -13  -3   6    3.59    0.88
  13   3  -6    1.62    0.92
 -13   3   6    0.94    0.82
  13   3  -6    2.26    1.05
 -12  -3   6    0.24    0.56
 -12  -3   6    0.83    0.52
  12  -3  -6   -0.48    0.45
 -12   3   6    0.54    0.60
  12   3  -6   -0.25    0.49
  12   3  -6   -0.08    0.64
  11  -3  -6   53.61    3.87
 -11  -3   6   51.65    4.21
 -11  -3   6   48.61    3.69
 -11   3   6   50.27    3.79
  11   3  -6   51.69    4.27
  11   3  -6   45.97    3.77
  10  -3  -6    6.19    1.11
 -10  -3   6    7.07    1.09
 -10  -3   6    6.19    1.12
 -10   3   6    4.89    0.97
  10   3  -6    5.49    1.07
  -9  -3   6   60.93    4.06
  -9  -3   6   63.04    4.19
   9  -3  -6   55.47    4.09
  -9  -3   6   59.14    4.64
  -9   3   6   55.07    4.50
  -9   3   6   60.56    4.10
   9   3  -6   52.98    4.57
   9   3  -6   55.63    4.06
  -8  -3   6    3.94    0.77
  -8  -3   6    4.77    0.84
  -8   3   6    9.59    1.06
   8   3  -6    6.80    0.98
  -8   3   6    5.35    0.89
   8   3  -6    5.90    0.94
  -7  -3   6   28.75    2.31
   7  -3  -6   31.48    2.70
  -7  -3   6   35.08    2.52
  -7  -3   6   29.45    2.69
   7   3  -6   34.42    2.80
  -7   3   6   33.64    2.42
   6  -3  -6   10.32    1.40
  -6  -3   6   10.64    1.25
  -6  -3   6    9.53    1.17
  -6   3   6   12.67    1.30
  -6   3   6   14.80    1.26
   6   3  -6   11.78    1.45
  -5  -3   6  172.11   10.57
  -5  -3   6  168.12    9.93
  -5  -3   6  164.28   11.32
   5  -3  -6  161.43   11.12
  -5   3   6  157.63    9.96
  -5   3   6  146.74   11.23
   5   3  -6  171.72   11.20
  -4  -3   6    0.73    0.31
  -4  -3   6    0.77    0.27
   4  -3  -6    1.01    0.36
  -4  -3   6    0.45    0.37
  -4  -3   6    0.90    0.36
  -4   3   6    0.39    0.27
   4   3  -6    0.96    0.45
  -3  -3   6   10.40    1.02
  -3  -3   6    8.92    1.01
   3  -3  -6   11.18    1.10
  -3  -3   6    9.33    0.96
  -3  -3   6   10.63    0.91
  -3   3   6    9.56    1.05
  -3   3   6   10.68    0.96
   3   3  -6   11.78    1.19
  -2  -3   6   13.43    1.11
   2  -3  -6   13.63    1.20
  -2  -3   6    9.70    1.09
  -2  -3   6   13.84    1.17
  -2  -3   6   11.84    0.98
   2   3  -6   12.82    1.28
  -2   3   6   10.45    1.02
  -2   3   6   11.06    1.14
  -1  -3   6  182.42   12.60
  -1  -3   6  201.79   11.90
  -1  -3   6  179.47   12.81
  -1  -3   6  216.01   13.49
   1  -3  -6  201.74   13.31
   1  -3  -6  199.24   12.70
  -1   3   6  195.58   13.51
   1   3  -6  207.07   13.41
  -1   3   6  204.54   11.99
   0  -3   6    9.52    0.88
   0  -3  -6    9.58    1.06
   0  -3   6    7.84    0.96
   0  -3  -6    9.93    1.02
   0  -3   6    8.78    0.85
   0  -3   6    8.69    0.84
   0   3  -6   10.91    1.33
   0   3   6   10.09    1.10
   0   3   6   10.43    0.99
   1  -3   6  227.04   14.45
   1  -3   6  207.86   12.88
  -1  -3  -6  210.56   14.39
   1  -3   6  232.90   13.60
  -1  -3  -6  218.26   13.68
  -1  -3  -6  201.14   14.60
   1  -3   6  192.20   13.84
  -1   3  -6  215.44   14.49
   1   3   6  233.64   13.03
   1   3   6  205.48   14.56
   2  -3   6   24.31    1.83
   2  -3   6   17.00    1.61
  -2  -3  -6   24.70    1.98
   2  -3   6   22.04    1.63
  -2  -3  -6   22.40    1.87
  -2  -3  -6   25.75    1.78
   2   3   6   21.62    1.82
  -2   3  -6   23.27    2.07
   2   3   6   20.72    1.75
   3  -3   6   22.42    1.66
   3  -3   6   25.65    1.93
  -3  -3  -6   23.38    1.78
  -3  -3  -6   23.17    2.01
  -3  -3  -6   22.96    1.96
   3  -3   6   23.99    1.80
  -3   3  -6   25.37    2.17
   3   3   6   20.54    1.82
   3   3   6   20.80    1.86
  -4  -3  -6   11.44    1.32
   4  -3   6   13.37    1.35
  -4  -3  -6   13.66    1.54
  -4  -3  -6   12.38    1.09
   4  -3   6   10.63    1.25
   4   3   6   10.73    1.12
   4   3   6    9.97    1.32
  -4   3  -6   11.98    1.60
   5  -3   6   63.34    4.23
  -5  -3  -6   58.97    4.43
  -5  -3  -6   54.69    4.31
   5  -3   6   57.09    3.96
  -5   3  -6   53.39    4.48
   5   3   6   61.48    4.10
  -6  -3  -6    0.02    0.35
   6  -3   6   -0.07    0.33
   6  -3   6   -0.35    0.26
   6   3   6   -0.02    0.33
   7  -3   6   30.31    2.43
  -7  -3  -6   28.35    2.61
   7  -3   6   32.27    2.53
  -7   3  -6   26.79    2.69
   7   3   6   27.88    2.46
   8  -3   6   15.03    1.76
  -8  -3  -6   13.89    1.86
   8  -3   6   13.12    1.68
  -8   3  -6   14.56    1.97
   8   3   6   13.53    1.79
  -9  -3  -6   15.02    1.98
   9  -3   6   11.49    1.55
   9  -3   6   14.64    1.79
  -9   3  -6   14.55    2.10
   9   3   6    9.23    1.65
  10  -3   6    0.90    0.60
 -10  -3  -6    1.03    0.65
  10   3   6   -1.92    0.58
 -10   3  -6    0.89    0.78
  11  -3   6   39.44    3.52
 -11  -3  -6   49.51    4.03
 -11   3  -6   41.15    3.97
  11   3   6   43.09    3.78
 -13  -4   6   20.42    2.18
  13  -4  -6   14.93    2.00
 -13  -4   6   13.84    2.18
  13   4  -6   14.27    2.08
  13   4  -6   16.87    2.37
 -13   4   6   14.21    1.93
  12  -4  -6    2.94    0.92
 -12  -4   6    0.93    0.53
 -12  -4   6    1.54    0.83
 -12   4   6    0.33    0.57
  12   4  -6    0.87    0.74
  12   4  -6    1.79    0.82
 -11  -4   6   16.17    1.82
  11  -4  -6   15.67    1.91
 -11  -4   6   17.21    2.19
  11   4  -6   19.40    2.45
 -11   4   6   15.72    1.93
  11   4  -6   17.10    2.02
  10  -4  -6    0.89    0.52
 -10  -4   6    1.07    0.49
 -10  -4   6    0.74    0.51
 -10   4   6   -0.05    0.57
  10   4  -6    0.85    0.50
  10   4  -6    1.46    0.79
 -10   4   6    0.83    0.53
  -9  -4   6   15.53    1.55
   9  -4  -6   15.01    1.73
  -9  -4   6   13.64    1.61
  -9  -4   6   19.46    1.83
  -9   4   6   15.87    1.86
   9   4  -6   16.12    2.00
  -9   4   6   16.08    1.74
   9   4  -6   16.91    1.79
  -8  -4   6    3.43    0.66
  -8  -4   6    1.89    0.61
   8  -4  -6    2.19    0.59
  -8  -4   6    1.85    0.53
   8   4  -6    0.31    0.58
  -8   4   6    2.28    0.58
   8   4  -6    2.33    0.63
  -7  -4   6   58.18    3.94
   7  -4  -6   58.65    4.16
  -7  -4   6   59.84    4.45
  -7  -4   6   56.96    4.15
   7  -4  -6   55.90    4.45
   7   4  -6   59.68    4.54
   7   4  -6   59.91    3.98
  -7   4   6   60.56    4.44
  -7   4   6   59.78    4.00
   6  -4  -6   -0.18    0.21
  -6  -4   6   -0.04    0.21
  -6  -4   6   -0.11    0.21
   6  -4  -6    0.07    0.27
  -6  -4   6   -0.03    0.29
  -6   4   6   -0.23    0.17
  -6   4   6    0.25    0.30
  -5  -4   6   11.75    1.24
  -5  -4   6    7.37    1.10
  -5  -4   6   10.94    0.93
   5  -4  -6    9.02    1.21
   5  -4  -6    8.67    1.12
   5   4  -6    9.25    1.25
  -5   4   6    9.50    1.08
  -4  -4   6   21.02    1.86
   4  -4  -6   23.71    1.88
  -4  -4   6   22.44    1.59
  -4  -4   6   17.52    1.70
   4  -4  -6   22.30    1.77
  -4  -4   6   22.16    1.74
   4   4  -6   20.63    1.92
  -4   4   6   20.94    1.86
  -4   4   6   22.30    1.67
  -3  -4   6  160.29    9.49
  -3  -4   6  169.92   10.88
  -3  -4   6  163.25   10.16
  -3  -4   6  173.93   10.30
   3  -4  -6  164.06   10.69
   3  -4  -6  150.23   10.17
  -3   4   6  138.18   10.82
  -3   4   6  150.88    9.57
   3   4  -6  143.92   10.69
  -2  -4   6    1.03    0.34
  -2  -4   6    1.51    0.38
   2  -4  -6    0.77    0.32
   2  -4  -6    1.99    0.47
  -2  -4   6    1.21    0.29
  -2  -4   6    1.23    0.43
  -2   4   6    1.64    0.43
  -2   4   6    0.75    0.31
   2   4  -6    1.14    0.52
   1  -4  -6  126.49    8.19
  -1  -4   6  131.35    8.27
  -1  -4   6  115.14    8.61
  -1  -4   6  126.89    8.12
  -1  -4   6  129.00    7.61
   1  -4  -6  129.62    8.56
   1   4  -6  120.56    8.64
  -1   4   6  124.83    8.72
  -1   4   6  123.73    7.72
   0  -4   6   92.74    5.87
   0  -4  -6   88.14    5.81
   0  -4   6   74.44    5.66
   0  -4   6   94.12    6.06
   0  -4  -6   81.99    6.19
   0  -4   6   84.79    5.37
   0  -4  -6   89.06    6.07
   0   4   6   88.85    6.16
   0   4   6   85.10    5.51
   0   4  -6   89.13    6.23
  -1  -4  -6  120.91    7.37
   1  -4   6  107.83    7.05
  -1  -4  -6  105.42    7.41
   1  -4   6   99.89    6.82
  -1  -4  -6  109.76    6.95
   1  -4   6   98.09    6.49
   1  -4   6  107.65    7.23
   1   4   6   99.93    7.38
  -1   4  -6   96.87    7.40
   1   4   6  109.72    6.66
  -2  -4  -6   61.03    3.74
   2  -4   6   47.49    3.34
  -2  -4  -6   48.93    3.47
  -2  -4  -6   51.71    3.74
   2  -4   6   46.85    3.53
   2  -4   6   49.22    3.29
  -2   4  -6   51.58    3.90
   2   4   6   46.49    3.39
   2   4   6   44.95    3.66
   3  -4   6  255.50   16.10
  -3  -4  -6  256.91   16.67
  -3  -4  -6  272.63   15.82
  -3  -4  -6  234.49   16.91
   3  -4   6  221.65   15.62
   3  -4   6  243.66   14.95
   3   4   6  256.75   16.90
   3   4   6  261.33   15.10
  -3   4  -6  236.10   16.75
   4  -4   6   30.35    2.19
  -4  -4  -6   25.14    2.23
   4  -4   6   23.49    1.97
  -4  -4  -6   25.69    2.24
  -4  -4  -6   29.46    2.06
  -4   4  -6   24.12    2.35
   4   4   6   22.26    2.07
   4   4   6   28.31    2.20
   5  -4   6    3.86    0.74
  -5  -4  -6    5.50    0.93
   5  -4   6    4.43    0.78
  -5  -4  -6    4.08    0.82
  -5   4  -6    4.61    1.01
   5   4   6    4.82    0.91
  -6  -4  -6   25.24    2.40
   6  -4   6   28.66    2.24
   6  -4   6   29.07    2.33
   6   4   6   25.73    2.28
  -6   4  -6   28.31    2.58
   7  -4   6   86.19    6.00
  -7  -4  -6   97.21    6.71
   7  -4   6   89.52    6.39
   7   4   6   92.73    6.21
  -7   4  -6   88.58    6.82
   8  -4   6   16.15    1.83
  -8  -4  -6   14.67    1.87
   8  -4   6   11.37    1.54
   8   4   6   11.90    1.69
  -8   4  -6   11.32    1.82
   9  -4   6   15.65    1.93
  -9  -4  -6   16.66    2.14
   9  -4   6   20.90    2.18
   9   4   6   14.13    2.04
  -9   4  -6   15.40    2.23
  10  -4   6    9.93    1.54
 -10  -4  -6   12.41    1.83
  10   4   6    9.55    1.67
 -10   4  -6   10.68    1.83
 -11  -4  -6    5.57    1.42
 -11   4  -6    8.64    1.73
 -13  -5   6    5.78    1.33
  13  -5  -6    5.27    1.26
 -13  -5   6    5.58    1.07
  13   5  -6    6.69    1.47
 -13   5   6    3.66    1.11
  13   5  -6    4.64    1.31
 -12  -5   6   20.93    2.56
 -12  -5   6   18.15    2.07
  12  -5  -6   18.68    2.26
  12   5  -6   15.91    2.16
  12   5  -6   21.80    2.76
 -12   5   6   19.33    2.23
  11  -5  -6   24.52    2.22
 -11  -5   6   24.25    2.11
 -11  -5   6   22.45    2.39
  11   5  -6   18.67    2.26
 -11   5   6   25.72    2.26
  11   5  -6   25.19    2.54
 -10  -5   6    2.32    0.66
  10  -5  -6    2.89    0.78
 -10  -5   6    3.00    0.89
 -10   5   6    3.52    0.90
 -10   5   6    2.31    0.70
  10   5  -6    1.26    0.64
  10   5  -6    3.88    1.05
   9  -5  -6   25.70    2.17
  -9  -5   6   24.76    2.42
  -9  -5   6   24.36    2.14
  -9  -5   6   24.50    2.05
  -9   5   6   26.07    2.15
   9   5  -6   25.44    2.13
   9   5  -6   24.64    2.43
  -8  -5   6   57.77    4.07
  -8  -5   6   56.48    3.84
   8  -5  -6   55.14    4.02
  -8  -5   6   53.24    4.42
   8   5  -6   55.08    3.87
   8   5  -6   57.61    4.45
  -8   5   6   58.81    4.33
  -8   5   6   54.00    3.89
   7  -5  -6   17.39    1.54
   7  -5  -6   17.73    1.72
  -7  -5   6   17.04    1.45
  -7  -5   6   16.18    1.56
  -7   5   6   16.46    1.66
   7   5  -6   19.16    1.83
   7   5  -6   14.71    1.43
  -7   5   6   16.19    1.48
  -6  -5   6    8.15    0.94
  -6  -5   6    7.77    1.05
   6  -5  -6    7.67    1.02
   6  -5  -6    7.95    1.16
  -6  -5   6    7.88    1.18
  -6   5   6    8.92    1.19
  -6   5   6    9.78    1.15
   6   5  -6    7.65    1.19
  -5  -5   6   87.33    5.32
   5  -5  -6   85.83    6.03
  -5  -5   6   82.17    5.71
  -5  -5   6   76.49    6.09
   5  -5  -6   85.20    5.71
  -5   5   6   89.26    6.09
  -5   5   6   85.72    5.41
   5   5  -6   81.27    6.04
  -4  -5   6   56.09    4.57
  -4  -5   6   66.02    4.92
  -4  -5   6   71.28    4.25
   4  -5  -6   71.99    4.85
   4  -5  -6   68.95    4.63
  -4  -5   6   64.64    4.59
   4   5  -6   67.20    4.89
  -4   5   6   69.55    4.35
  -4   5   6   65.32    4.90
  -3  -5   6    1.56    0.32
  -3  -5   6    1.07    0.48
   3  -5  -6    1.96    0.48
  -3  -5   6    1.04    0.32
  -3  -5   6    0.97    0.35
   3  -5  -6    1.13    0.39
  -3   5   6    1.49    0.39
   3   5  -6    0.98    0.49
  -2  -5   6   44.25    3.19
  -2  -5   6   44.01    3.25
  -2  -5   6   47.84    2.92
   2  -5  -6   42.28    3.33
   2  -5  -6   44.50    3.25
  -2  -5   6   47.50    3.40
  -2   5   6   43.32    3.44
   2   5  -6   50.24    3.48
  -2   5   6   43.03    3.03
  -1  -5   6   55.74    3.91
  -1  -5   6   64.84    4.18
   1  -5  -6   52.26    4.24
   1  -5  -6   54.99    3.96
  -1  -5   6   59.01    3.61
   1  -5  -6   59.29    4.13
  -1  -5   6   50.48    3.93
  -1   5   6   58.05    4.24
  -1   5   6   56.45    3.75
   1   5  -6   59.09    4.28
   0  -5   6    1.03    0.29
   0  -5  -6    1.30    0.44
   0  -5  -6    1.37    0.43
   0  -5   6    1.98    0.44
   0  -5   6    1.66    0.34
   0  -5   6    0.81    0.36
   0  -5  -6    1.36    0.42
   0   5   6    0.86    0.34
   0   5   6    1.38    0.43
   0   5  -6    1.71    0.60
   1  -5   6   21.76    1.71
   1  -5   6   22.07    1.81
   1  -5   6   23.25    1.64
   1  -5   6   21.13    1.74
  -1  -5  -6   25.43    1.85
  -1  -5  -6   21.45    1.87
   1   5   6   23.63    1.94
  -1   5  -6   21.74    2.06
   1   5   6   22.29    1.77
  -2  -5  -6  121.34    8.63
  -2  -5  -6  120.28    8.02
   2  -5   6  122.59    8.14
   2  -5   6  123.14    7.90
  -2  -5  -6  121.67    8.44
   2  -5   6  122.73    7.54
   2   5   6  119.65    7.68
  -2   5  -6  125.27    8.63
   2   5   6  124.71    8.59
   3  -5   6   14.20    1.25
   3  -5   6   14.51    1.36
  -3  -5  -6   17.97    1.40
  -3  -5  -6   13.76    1.47
   3  -5   6   13.43    1.16
  -3  -5  -6   16.30    1.45
   3   5   6   13.83    1.41
  -3   5  -6   17.25    1.64
   3   5   6   10.99    1.42
  -4  -5  -6   19.92    1.84
   4  -5   6   18.86    1.68
   4  -5   6   18.20    1.57
  -4  -5  -6   18.89    1.60
  -4  -5  -6   19.69    1.78
  -4   5  -6   22.47    2.05
   4   5   6   17.39    1.68
   5  -5   6    8.06    1.09
  -5  -5  -6   11.83    1.40
   5  -5   6    9.44    1.18
  -5  -5  -6    9.76    1.36
  -5  -5  -6    8.21    1.06
  -5   5  -6   10.15    1.45
   5   5   6    9.40    1.28
  -6  -5  -6   -0.08    0.53
  -6  -5  -6    0.43    0.40
   6  -5   6    0.47    0.37
   6   5   6   -0.04    0.44
   7  -5   6   10.58    1.47
   7  -5   6   13.18    1.56
  -7  -5  -6   14.29    1.72
  -7   5  -6   12.44    1.81
   7   5   6   12.07    1.67
   8  -5   6   32.27    2.85
   8  -5   6   30.58    2.70
  -8  -5  -6   37.54    3.09
   8   5   6   34.47    2.94
  -8   5  -6   39.04    3.33
   9  -5   6    2.09    0.79
   9  -5   6    2.06    0.68
  -9  -5  -6    1.82    0.70
   9   5   6   -0.28    0.62
  -9   5  -6    1.15    0.80
  10  -5   6    3.13    0.93
 -10   5  -6    5.91    1.30
  10   5   6    3.67    1.24
 -12  -6   6    0.80    0.47
  12  -6  -6    0.54    0.59
 -12  -6   6    1.74    0.81
  12   6  -6    1.74    0.88
  12   6  -6    1.20    0.79
 -12   6   6    1.59    0.76
 -11  -6   6    0.68    0.51
 -11  -6   6    2.28    0.91
  11  -6  -6    2.16    0.79
 -11   6   6    3.24    0.95
  11   6  -6    0.44    0.62
  11   6  -6    2.22    0.89
 -10  -6   6   40.58    3.55
 -10  -6   6   39.52    3.01
  10  -6  -6   41.25    3.19
 -10   6   6   39.48    3.15
  10   6  -6   38.71    3.08
  10   6  -6   41.88    3.62
  -9  -6   6    2.59    0.62
  -9  -6   6    2.38    0.75
  -9  -6   6    1.86    0.61
   9  -6  -6    1.81    0.64
  -9   6   6    2.17    0.79
  -9   6   6    3.00    0.69
   9   6  -6    1.81    0.63
   9   6  -6    1.63    0.78
  -8  -6   6    1.66    0.52
  -8  -6   6    1.53    0.54
   8  -6  -6    1.41    0.51
   8   6  -6    1.47    0.51
  -8   6   6    1.33    0.63
  -8   6   6    1.64    0.53
   8   6  -6    1.58    0.75
  -7  -6   6   12.65    1.31
  -7  -6   6   10.55    1.35
   7  -6  -6   11.42    1.48
   7  -6  -6   10.68    1.31
  -7  -6   6   10.92    1.54
  -7   6   6   10.68    1.42
   7   6  -6   13.48    1.21
  -7   6   6   10.94    1.29
   7   6  -6   11.97    1.61
  -6  -6   6   57.33    3.68
   6  -6  -6   57.29    3.99
  -6  -6   6   60.15    4.04
  -6  -6   6   59.09    4.34
   6  -6  -6   50.42    4.17
   6   6  -6   58.38    3.73
   6   6  -6   49.95    4.24
  -6   6   6   52.78    4.20
  -6   6   6   54.70    3.78
  -5  -6   6   19.61    1.85
   5  -6  -6   20.62    1.84
  -5  -6   6   18.12    1.71
  -5  -6   6   21.07    1.55
   5  -6  -6   20.38    1.75
  -5   6   6   21.03    1.88
   5   6  -6   19.61    1.90
  -5   6   6   20.71    1.66
   4  -6  -6  121.89    8.15
  -4  -6   6  124.77    7.53
  -4  -6   6  103.28    8.15
   4  -6  -6  122.07    8.51
  -4  -6   6  138.32    8.21
  -4  -6   6  124.58    8.70
  -4   6   6  114.80    8.69
   4   6  -6  140.46    8.65
  -4   6   6  125.12    7.66
  -3  -6   6   11.40    1.21
  -3  -6   6   11.16    1.06
  -3  -6   6    7.86    1.08
  -3  -6   6    9.57    0.83
   3  -6  -6    9.61    1.24
   3  -6  -6    9.84    1.20
   3  -6  -6    9.35    1.14
  -3   6   6   10.57    1.12
   3   6  -6    9.91    1.30
   2  -6  -6    6.94    0.94
  -2  -6   6    5.44    0.79
  -2  -6   6    5.56    0.84
   2  -6  -6    6.28    0.94
  -2  -6   6    6.28    0.85
  -2  -6   6    7.73    0.64
   2  -6  -6    7.29    0.92
  -2   6   6    5.62    0.90
   2   6  -6    8.17    1.14
  -2   6   6    5.68    0.79
   1  -6  -6   39.32    2.91
  -1  -6   6   42.06    2.86
  -1  -6   6   35.56    2.76
  -1  -6   6   40.46    2.51
   1  -6  -6   43.55    2.90
  -1  -6   6   30.77    2.86
   1  -6  -6   37.90    3.07
  -1   6   6   38.87    2.69
   1   6  -6   41.32    3.11
  -1   6   6   37.66    3.02
   0  -6  -6  170.67   11.79
   0  -6   6  171.84   11.15
   0  -6   6  164.86   10.93
   0  -6  -6  172.57   11.04
   0  -6   6  158.85   10.19
   0  -6  -6  169.42   11.46
   0  -6   6  180.70   11.63
   0   6   6  170.61   10.41
   0   6  -6  172.18   11.65
   0   6   6  171.18   11.79
  -1  -6  -6   11.05    1.40
   1  -6   6   12.70    1.05
  -1  -6  -6   11.39    1.14
   1  -6   6   10.78    0.94
   1  -6   6   11.25    1.12
   1  -6   6    9.81    1.00
  -1  -6  -6   12.60    1.15
   1   6   6   10.89    1.23
   1   6   6   10.87    1.18
  -1   6  -6    9.76    1.39
   2  -6   6   29.26    2.09
   2  -6   6   29.39    2.17
   2  -6   6   29.81    2.32
  -2  -6  -6   31.86    2.42
  -2  -6  -6   31.01    2.32
  -2  -6  -6   29.16    2.47
   2   6   6   31.47    2.29
   2   6   6   26.11    2.42
  -2   6  -6   29.09    2.52
   3  -6   6    7.89    0.94
   3  -6   6    8.61    1.05
  -3  -6  -6    6.63    0.96
  -3  -6  -6    9.06    1.08
   3  -6   6    7.44    0.85
   3   6   6    8.38    1.13
  -3   6  -6    5.89    1.12
   3   6   6    6.22    0.96
   4  -6   6   64.81    4.42
  -4  -6  -6   77.18    4.75
  -4  -6  -6   59.04    5.00
   4  -6   6   70.25    4.80
  -4  -6  -6   63.42    4.90
  -4   6  -6   65.59    5.14
   4   6   6   76.47    4.70
   5  -6   6    0.73    0.39
   5  -6   6    0.33    0.35
  -5  -6  -6    1.38    0.51
  -5  -6  -6    1.10    0.39
  -5  -6  -6    1.09    0.62
  -5   6  -6    0.29    0.50
   5   6   6    0.96    0.50
   6  -6   6  104.46    7.14
  -6  -6  -6  106.99    7.56
   6  -6   6  106.57    6.70
   6   6   6  100.24    6.87
  -6   6  -6   98.56    7.61
   7  -6   6    5.93    0.99
   7  -6   6    4.10    0.85
  -7   6  -6    7.82    1.19
   7   6   6    3.97    0.96
   8  -6   6    2.14    0.67
   8  -6   6    0.30    0.41
   8   6   6    1.15    0.72
  -8   6  -6    2.10    0.84
   9  -6   6    0.93    0.68
   9   6   6   -0.92    0.79
  -9   6  -6    1.87    0.84
  10  -6   6   42.76    3.36
  10   6   6   39.00    3.55
 -10   6  -6   38.76    3.80
  12  -7  -6   40.44    3.14
 -12  -7   6   30.95    3.30
  12   7  -6   31.38    3.00
 -12   7   6   38.57    3.07
  11  -7  -6    0.47    0.54
 -11  -7   6   -0.12    0.48
 -11  -7   6    0.52    0.49
 -11   7   6    0.39    0.66
  11   7  -6    0.12    0.58
  10  -7  -6    1.38    0.62
 -10  -7   6    0.86    0.47
 -10  -7   6    1.56    0.66
  10   7  -6    0.18    0.69
 -10   7   6    2.10    0.78
  10   7  -6    1.29    0.66
  -9  -7   6    0.61    0.54
  -9  -7   6   -0.12    0.33
   9  -7  -6   -0.13    0.37
  -9  -7   6    0.53    0.40
  -9   7   6    0.91    0.49
   9   7  -6    0.41    0.41
  -9   7   6    1.72    0.64
   9   7  -6    0.08    0.61
  -8  -7   6   90.56    5.70
   8  -7  -6   76.31    5.97
  -8  -7   6   92.45    6.69
  -8  -7   6   95.15    6.20
  -8   7   6   97.86    6.58
  -8   7   6   94.21    5.85
   8   7  -6   73.72    6.41
  -7  -7   6    3.32    0.63
   7  -7  -6    1.65    0.49
  -7  -7   6    1.93    0.57
   7  -7  -6    3.13    0.76
  -7  -7   6    1.61    0.53
   7   7  -6    1.66    0.76
   7   7  -6    2.62    0.57
  -7   7   6    2.35    0.60
  -7   7   6    2.29    0.72
  -6  -7   6    8.62    1.18
   6  -7  -6    9.82    1.29
  -6  -7   6    8.45    0.98
   6  -7  -6    8.40    1.10
  -6  -7   6    8.21    1.24
   6   7  -6    9.67    1.35
   6   7  -6    8.10    1.00
  -6   7   6    6.29    0.97
  -5  -7   6   12.70    1.54
   5  -7  -6   11.53    1.43
  -5  -7   6   13.87    1.31
   5  -7  -6   10.35    1.27
  -5  -7   6   12.05    1.10
   5   7  -6   13.07    1.56
  -5   7   6   14.58    1.22
  -5   7   6    7.14    1.27
   4  -7  -6   42.73    3.12
   4  -7  -6   38.65    2.99
  -4  -7   6   38.06    3.19
  -4  -7   6   39.27    3.00
   4  -7  -6   39.77    3.22
   4   7  -6   42.71    3.23
  -4   7   6   39.36    2.80
   3  -7  -6    0.87    0.43
  -3  -7   6    1.12    0.44
  -3  -7   6    0.80    0.40
   3  -7  -6    1.40    0.45
  -3  -7   6    1.39    0.50
   3  -7  -6    0.75    0.35
  -3   7   6    1.25    0.46
   3   7  -6    0.76    0.56
  -3   7   6    1.10    0.37
   2  -7  -6   67.63    4.56
  -2  -7   6   66.66    4.54
  -2  -7   6   69.51    4.53
  -2  -7   6   62.09    4.74
   2  -7  -6   62.24    4.85
   2  -7  -6   68.03    4.65
  -2   7   6   65.76    4.24
   2   7  -6   60.85    4.76
  -2   7   6   61.09    4.79
   1  -7  -6    4.97    0.79
  -1  -7   6    6.76    0.88
  -1  -7   6    5.76    0.81
   1  -7  -6    5.70    0.94
  -1  -7   6    5.57    0.80
   1  -7  -6    6.41    0.86
  -1   7   6    4.27    0.71
  -1   7   6    5.58    0.89
   1   7  -6    6.53    1.05
   0  -7   6    1.32    0.41
   0  -7   6    1.02    0.34
   0  -7   6    1.07    0.35
   0  -7  -6    0.68    0.36
   0   7   6    1.73    0.47
   0   7  -6    1.55    0.64
   0   7   6    1.87    0.55
  -1  -7  -6   43.33    3.22
   1  -7   6   42.18    3.22
  -1  -7  -6   44.62    3.51
   1  -7   6   43.60    3.22
   1  -7   6   45.11    3.13
  -1   7  -6   44.24    3.53
   1   7   6   46.45    3.10
   1   7   6   42.28    3.45
  -2  -7  -6   68.70    5.08
  -2  -7  -6   64.78    4.72
   2  -7   6   71.37    4.79
   2  -7   6   69.40    4.61
   2   7   6   67.56    5.09
  -2   7  -6   66.75    5.08
   2   7   6   67.64    4.55
   3  -7   6    3.70    0.66
   3  -7   6    4.40    0.65
  -3  -7  -6    4.61    0.77
  -3  -7  -6    2.40    0.83
   3   7   6    3.79    0.78
   3   7   6    4.20    0.79
  -3   7  -6    4.50    0.94
  -4  -7  -6   50.76    3.73
   4  -7   6   47.73    3.50
  -4  -7  -6   45.98    3.45
   4   7   6   44.27    3.39
  -4   7  -6   46.64    3.85
  -5  -7  -6   17.95    1.78
  -5  -7  -6   27.75    2.13
  -5  -7  -6   16.80    1.75
   5  -7   6   18.32    1.80
  -5   7  -6   26.97    2.06
   5   7   6   21.06    1.95
   6  -7   6    2.32    0.61
  -6  -7  -6    3.36    0.94
   6   7   6    3.26    0.81
  -6   7  -6    2.72    0.91
  -7  -7  -6    0.12    0.65
   7  -7   6    2.61    0.66
   7   7   6    1.47    0.67
   8  -7   6   46.17    3.79
  -8   7  -6   51.02    4.30
   8   7   6   49.44    3.84
  -9   7  -6    9.24    1.71
   9   7   6    6.20    1.37
 -10   7  -6    1.01    0.68
  10   7   6    0.95    0.87
  12  -8  -6    0.78    0.70
 -12  -8   6    2.58    1.03
 -12   8   6    1.41    0.87
 -11  -8   6    1.45    0.74
  11  -8  -6    2.87    0.84
 -11   8   6    1.43    0.76
 -10  -8   6   13.20    1.90
  10  -8  -6   13.39    1.71
 -10   8   6   12.36    1.65
   9  -8  -6   21.79    2.14
  -9  -8   6   28.98    2.59
  -9   8   6   24.98    2.20
   8  -8  -6   -0.15    0.36
  -8  -8   6    0.92    0.55
  -8  -8   6   -0.10    0.36
  -8   8   6    0.50    0.50
  -8   8   6    0.48    0.36
  -7  -8   6   29.45    2.24
   7  -8  -6   22.08    2.04
   7  -8  -6   24.85    2.25
  -7  -8   6   25.62    2.36
   7  -8  -6   24.77    2.25
  -7   8   6   25.65    2.03
  -7   8   6   18.76    2.19
   6  -8  -6   30.12    2.70
   6  -8  -6   32.09    2.61
   6  -8  -6   34.31    2.82
  -6  -8   6   31.10    2.64
  -6  -8   6   31.54    2.86
  -6   8   6   33.59    2.48
  -6   8   6   37.83    2.84
   5  -8  -6    4.87    0.91
  -5  -8   6    4.66    0.95
   5  -8  -6    5.37    0.91
  -5  -8   6    4.59    0.88
   5  -8  -6    4.98    0.86
  -5   8   6    4.09    0.75
   5   8  -6    4.62    0.96
  -4  -8   6   63.92    4.56
   4  -8  -6   64.24    4.69
  -4  -8   6   67.40    4.90
   4  -8  -6   70.12    4.59
  -4  -8   6   56.64    4.49
   4  -8  -6   62.47    4.87
  -4   8   6   67.94    4.26
   4   8  -6   55.18    4.70
  -4   8   6   71.36    4.82
   3  -8  -6   89.77    6.16
  -3  -8   6   81.05    6.05
  -3  -8   6   90.84    5.75
  -3  -8   6   89.17    5.73
   3  -8  -6   78.07    5.67
  -3   8   6   83.89    5.30
   3   8  -6   65.23    5.86
  -3   8   6   87.62    6.13
   2  -8  -6    5.42    1.00
  -2  -8   6    7.72    1.05
  -2  -8   6    6.26    0.92
  -2  -8   6    7.44    0.96
   2  -8  -6    6.08    0.94
   2   8  -6    5.92    1.03
  -2   8   6    7.33    0.91
   1  -8  -6   -0.05    0.22
   1  -8  -6    0.06    0.26
  -1  -8   6   -0.19    0.19
  -1  -8   6    0.09    0.25
  -1  -8   6    0.14    0.26
  -1   8   6   -0.32    0.21
   1   8  -6    0.12    0.49
  -1   8   6    0.21    0.33
   0  -8  -6   40.60    3.44
   0  -8  -6   42.24    3.21
   0  -8   6   45.42    3.27
   0  -8   6   43.53    3.17
   0  -8   6   40.27    3.10
   0   8  -6   43.19    3.44
   0   8   6   45.40    3.02
   0   8   6   42.01    3.41
  -1  -8  -6   24.73    2.18
  -1  -8  -6   29.44    2.34
   1  -8   6   25.92    2.16
   1  -8   6   27.12    2.13
   1   8   6   27.66    2.41
  -1   8  -6   29.51    2.47
   1   8   6   27.32    2.12
   2  -8   6    6.64    0.92
   2  -8   6    7.48    1.01
  -2  -8  -6    6.68    0.99
  -2  -8  -6    8.58    1.23
   2   8   6    6.87    0.99
  -2   8  -6    8.90    1.26
   2   8   6    9.27    1.26
   3  -8   6    6.25    0.83
  -3  -8  -6    7.42    1.03
  -3  -8  -6    5.20    1.04
   3  -8   6    7.17    0.94
   3   8   6    5.58    0.92
  -3   8  -6    5.87    1.11
  -4  -8  -6   34.24    2.68
   4  -8   6   30.76    2.62
  -4  -8  -6   35.49    2.93
  -4   8  -6   31.46    2.92
   4   8   6   36.79    2.70
  -5  -8  -6    0.66    0.38
  -5  -8  -6    0.15    0.38
   5  -8   6   -0.14    0.28
  -5  -8  -6    1.14    0.52
   5   8   6   -0.06    0.42
  -5   8  -6    1.11    0.67
  -6  -8  -6   57.93    4.35
   6  -8   6   49.68    3.94
  -6   8  -6   52.00    4.36
   6   8   6   51.97    3.95
  -7  -8  -6    1.05    0.57
   7  -8   6    0.78    0.43
  -7   8  -6    0.61    0.59
   7   8   6    1.38    0.69
   8   8   6    1.42    0.85
  -8   8  -6    0.85    0.70
   9   8   6    1.41    0.89
  -9   8  -6    4.91    1.31
  11  -9  -6    6.75    1.26
 -11  -9   6    6.54    1.44
 -11   9   6    6.13    1.23
 -10  -9   6    0.03    0.51
  10  -9  -6    0.73    0.54
 -10   9   6    0.22    0.58
   9  -9  -6   23.26    2.04
   9  -9  -6   21.96    2.23
  -9  -9   6   20.70    2.53
  -9   9   6   18.09    2.09
   8  -9  -6    0.19    0.38
  -8  -9   6    0.90    0.49
   8  -9  -6    1.25    0.54
  -8   9   6    0.07    0.56
  -8   9   6    0.38    0.44
   7  -9  -6    2.95    0.75
   7  -9  -6    1.83    0.68
  -7  -9   6    2.18    0.73
   7  -9  -6    2.80    0.73
  -7  -9   6    4.76    1.04
  -7   9   6    3.00    0.69
  -7   9   6    3.25    0.86
   6  -9  -6    1.14    0.49
   6  -9  -6    0.83    0.48
  -6  -9   6    1.16    0.54
  -6  -9   6    0.70    0.48
   6  -9  -6    0.18    0.43
  -6   9   6    1.44    0.48
  -5  -9   6   69.81    5.36
   5  -9  -6   68.93    4.94
   5  -9  -6   69.50    5.30
  -5  -9   6   55.70    4.87
  -5   9   6   79.89    4.68
  -5   9   6   76.94    5.31
   4  -9  -6    0.58    0.38
  -4  -9   6    0.58    0.32
  -4  -9   6    0.61    0.41
   4  -9  -6    0.83    0.43
  -4  -9   6    1.03    0.51
  -4   9   6    1.16    0.52
  -4   9   6    1.09    0.41
   3  -9  -6   54.89    4.42
  -3  -9   6   71.12    4.83
  -3  -9   6   69.01    4.52
  -3  -9   6   58.36    4.46
   3  -9  -6   58.93    4.80
  -3   9   6   64.70    4.16
  -3   9   6   63.37    4.81
   2  -9  -6   26.23    2.45
   2  -9  -6   26.03    2.27
  -2  -9   6   28.09    2.23
  -2  -9   6   32.00    2.43
  -2  -9   6   25.18    2.23
  -2   9   6   29.28    2.11
  -1  -9   6   40.38    3.04
   1  -9  -6   40.50    3.10
  -1  -9   6   36.36    3.15
   1  -9  -6   38.23    3.32
  -1  -9   6   43.05    3.09
   1   9  -6   47.36    3.37
  -1   9   6   38.75    3.30
  -1   9   6   42.52    2.88
   0  -9   6   -0.01    0.27
   0  -9   6    0.09    0.23
   0  -9   6    0.19    0.30
   0  -9  -6    0.39    0.34
   0  -9  -6    0.14    0.30
   0   9  -6    0.49    0.60
   0   9   6    0.37    0.33
   0   9   6    0.75    0.36
  -1  -9  -6  104.41    7.60
   1  -9   6   96.79    7.09
  -1  -9  -6  106.60    7.13
   1  -9   6  105.17    7.01
   1   9   6  109.65    7.68
   1   9   6  109.13    6.71
   2  -9   6   13.22    1.25
   2  -9   6   12.53    1.28
  -2  -9  -6   13.01    1.68
  -2  -9  -6   11.88    1.45
   2   9   6   12.15    1.40
   2   9   6   14.10    1.75
  -2   9  -6   14.06    1.72
  -3  -9  -6   13.35    1.60
   3  -9   6   12.22    1.45
  -3   9  -6   16.57    1.94
   3   9   6   12.93    1.52
  -4  -9  -6   11.89    1.57
   4  -9   6    7.33    1.11
  -4  -9  -6    8.34    1.19
   4   9   6    7.48    1.19
  -4   9  -6    8.50    1.42
   5  -9   6  101.33    7.00
  -5  -9  -6   88.76    7.42
  -5  -9  -6  102.56    6.94
  -5  -9  -6  101.17    7.00
  -5   9  -6  104.16    7.50
   5   9   6  111.43    6.79
  -6  -9  -6    0.97    0.65
   6  -9   6    1.73    0.53
  -6   9  -6    2.70    0.91
   6   9   6    3.53    0.90
  -7  -9  -6    1.33    0.65
   7  -9   6    1.48    0.60
  -7   9  -6    1.42    0.74
   7   9   6    0.96    0.78
   8   9   6    5.33    1.24
  -8   9  -6    4.28    1.17
  -9   9  -6   27.35    2.91
   9   9   6   28.38    3.11
 -11 -10   6   14.98    2.25
 -10 -10   6   -0.06    0.50
  10 -10  -6    0.75    0.67
  -9 -10   6   36.58    3.38
  -8 -10   6    3.52    0.94
  -8  10   6    2.02    0.73
   7 -10  -6   54.89    4.51
  -7 -10   6   54.59    4.67
   7 -10  -6   59.06    4.27
  -7  10   6   61.22    4.60
   6 -10  -6    0.27    0.35
   6 -10  -6    0.10    0.38
  -6 -10   6   -0.30    0.42
  -5 -10   6   13.19    1.61
   5 -10  -6   11.62    1.48
  -5 -10   6   13.81    1.69
   5 -10  -6   10.56    1.51
  -4 -10   6    0.86    0.50
   4 -10  -6    1.29    0.55
   4 -10  -6    1.02    0.48
  -4 -10   6    0.75    0.45
  -4 -10   6    1.29    0.46
  -4  10   6    1.20    0.59
  -3 -10   6   77.43    5.21
  -3 -10   6   69.18    5.46
   3 -10  -6   77.98    5.23
  -3 -10   6   71.44    5.18
   3 -10  -6   69.15    5.53
  -3  10   6   72.38    5.52
  -3  10   6   75.00    4.85
   2 -10  -6    5.86    0.97
  -2 -10   6    4.76    0.85
  -2 -10   6    6.94    1.05
   2 -10  -6    4.54    0.96
  -2 -10   6    6.66    0.96
  -2  10   6    7.12    0.92
  -2  10   6    3.87    0.90
   1 -10  -6    3.60    0.84
  -1 -10   6    2.49    0.63
   1 -10  -6    2.83    0.65
  -1 -10   6    3.40    0.65
  -1 -10   6    3.71    0.74
  -1  10   6    2.69    0.61
   0 -10  -6    0.38    0.35
   0 -10   6    0.20    0.24
   0 -10   6    0.14    0.32
   0 -10  -6   -0.12    0.27
   0 -10   6   -0.09    0.24
   0  10   6   -0.19    0.24
   0  10   6    0.60    0.31
   1 -10   6   21.58    1.77
  -1 -10  -6   21.79    2.03
  -1 -10  -6   15.47    1.91
   1 -10   6   20.77    1.77
   1  10   6   17.44    1.63
   1  10   6   20.78    2.04
   2 -10   6    2.96    0.65
   2 -10   6    2.37    0.58
  -2 -10  -6    2.84    0.74
  -2 -10  -6    3.59    0.79
  -2  10  -6    3.66    0.90
   2  10   6    2.06    0.59
  -3 -10  -6   23.46    2.28
  -3 -10  -6   27.03    2.19
   3 -10   6   23.36    1.98
  -3  10  -6   20.66    2.22
   3  10   6   20.40    1.93
   4 -10   6    0.52    0.37
  -4 -10  -6    0.34    0.44
  -4 -10  -6    0.24    0.45
  -4 -10  -6    0.88    0.39
   4  10   6    1.58    0.58
  -4  10  -6   -0.26    0.58
  -5 -10  -6    1.35    0.56
  -5 -10  -6    1.53    0.55
   5 -10   6    1.53    0.51
  -5 -10  -6    1.21    0.54
  -5  10  -6    1.21    0.79
   5  10   6    0.25    0.59
   6 -10   6    0.41    0.38
  -6 -10  -6    0.45    0.57
  -6  10  -6    1.35    0.71
   6  10   6    0.48    0.56
  -7 -10  -6    9.85    1.62
  -7  10  -6    9.74    1.70
   7  10   6   11.09    1.62
  -8 -10  -6    0.45    0.62
  -8  10  -6    0.87    0.76
   8  10   6    0.12    0.72
 -10 -11   6   -0.19    0.44
  -9 -11   6   18.99    2.47
  -8 -11   6   12.56    1.94
  -7 -11   6    1.15    0.73
   7 -11  -6    0.43    0.41
  -7  11   6    0.77    0.50
  -6 -11   6    3.17    0.85
   6 -11  -6    2.45    0.80
  -6  11   6    3.87    0.88
  -5 -11   6   64.11    5.30
   5 -11  -6   73.85    5.36
  -5  11   6   67.80    5.28
  -4 -11   6    2.72    0.76
   4 -11  -6    1.41    0.54
   4 -11  -6    2.69    0.74
  -4  11   6    2.50    0.69
  -3 -11   6   14.56    1.45
   3 -11  -6   12.64    1.61
   3 -11  -6   13.72    1.77
  -3 -11   6   11.38    1.55
  -3 -11   6   15.61    1.60
  -3  11   6   12.56    1.72
   2 -11  -6   17.85    1.65
   2 -11  -6   14.42    1.84
  -2 -11   6   16.25    1.67
  -2 -11   6   13.25    1.67
  -2 -11   6   17.96    1.60
  -2  11   6   14.62    1.86
  -1 -11   6   47.34    3.65
  -1 -11   6   48.50    3.49
   1 -11  -6   49.91    3.85
   1 -11  -6   43.74    3.51
  -1 -11   6   41.31    3.41
  -1  11   6   45.55    3.80
   0 -11   6    0.61    0.42
   0 -11  -6    0.57    0.44
   0 -11  -6    0.55    0.49
   0 -11   6    0.22    0.28
   0  11   6    0.72    0.45
  -1 -11  -6   34.76    2.78
   1 -11   6   30.14    2.37
   1 -11   6   26.42    2.32
  -1 -11  -6   25.62    2.41
   1  11   6   28.03    2.65
  -2 -11  -6    9.66    1.48
   2 -11   6    8.77    1.19
   2 -11   6    8.56    1.17
   3 -11   6    5.73    0.93
  -3 -11  -6    8.95    1.45
  -4 -11  -6    7.70    1.15
   4 -11   6    6.36    1.07
  -4 -11  -6   10.26    1.54
  -5 -11  -6   45.74    3.75
   5 -11   6   40.04    3.33
  -5 -11  -6   44.81    3.38
  -5  11  -6   38.49    3.61
  -6 -11  -6    4.44    1.13
  -6  11  -6    5.10    1.22
  -7 -11  -6    9.21    1.60
  -7  11  -6    7.06    1.47
  -8 -11  -6    6.94    1.46
  -8  11  -6    9.33    1.62
  -9 -12   6   12.85    2.01
  -8 -12   6    1.09    0.66
   7 -12  -6   12.83    1.66
  -7 -12   6    9.26    1.63
  -7  12   6    9.12    1.47
   6 -12  -6    5.37    1.09
  -6 -12   6    5.84    1.19
  -6  12   6    5.42    1.08
   5 -12  -6    5.14    1.10
  -5 -12   6   10.65    1.56
  -5  12   6    8.29    1.34
  -4 -12   6   30.10    2.72
   4 -12  -6   26.80    2.62
  -4  12   6   29.53    2.69
   3 -12  -6   16.03    2.03
  -3 -12   6   17.97    1.89
  -3 -12   6   19.31    1.78
  -3  12   6   17.09    2.11
  -2 -12   6   -0.19    0.35
  -2 -12   6    0.17    0.32
   2 -12  -6   -0.25    0.27
  -2  12   6    0.06    0.40
  -1 -12   6    0.21    0.39
  -1 -12   6    1.45    0.48
   1 -12  -6    0.88    0.61
  -1  12   6    0.76    0.48
   0 -12   6   54.26    4.23
   0 -12   6   57.59    4.25
   0 -12  -6   61.62    4.74
   0  12   6   59.83    4.72
   1 -12   6   15.07    1.54
  -1 -12  -6   16.03    2.04
   1 -12   6   18.28    1.67
  -2 -12  -6   22.17    2.28
   2 -12   6   22.45    1.99
   2 -12   6   21.56    1.97
  -3 -12  -6    0.30    0.47
  -3 -12  -6    0.27    0.32
   3 -12   6   -0.21    0.26
  -4 -12  -6   38.78    3.58
   4 -12   6   39.80    3.22
  -4 -12  -6   44.19    3.29
  -5 -12  -6   -0.14    0.45
  -5 -12  -6   -0.49    0.40
  -6 -12  -6   31.52    3.08
  -7 -12  -6    0.45    0.64
  -8 -13   6   24.45    2.96
  -7 -13   6    0.86    0.64
   6 -13  -6   11.34    1.61
  -6 -13   6    6.78    1.36
  -6  13   6    8.79    1.48
   5 -13  -6   -0.12    0.42
  -5 -13   6   -0.10    0.45
  -5  13   6   -0.28    0.41
  -4 -13   6   19.47    2.35
   4 -13  -6   19.29    2.33
  -4  13   6   19.49    2.37
   3 -13  -6    6.84    1.27
  -3 -13   6    5.10    1.07
  -3 -13   6    5.93    1.04
  -3  13   6    7.04    1.32
  -2 -13   6   26.10    2.27
  -2 -13   6   26.64    2.42
   2 -13  -6   23.03    2.45
  -2  13   6   25.48    2.51
   1 -13  -6   -0.43    0.29
  -1 -13   6    0.09    0.32
  -1 -13   6    0.10    0.41
  -1  13   6   -0.02    0.40
   0 -13  -6    0.07    0.48
   0 -13   6    0.38    0.37
   1 -13   6   10.51    1.31
  -1 -13  -6    8.82    1.53
   2 -13   6   36.56    2.93
  -2 -13  -6   41.15    3.45
  -2 -13  -6   33.06    2.81
  -3 -13  -6    0.98    0.47
  -3 -13  -6    1.36    0.72
  -4 -13  -6   15.35    2.19
  -5 -13  -6    3.03    0.95
  -6 -13  -6    2.53    0.95
  -7 -14   6    2.23    0.93
   6 -14  -6    8.51    1.43
  -6 -14   6    7.15    1.43
  -6  14   6    4.29    1.15
   5 -14  -6    0.36    0.50
  -5 -14   6    0.42    0.56
  -5  14   6    0.61    0.64
  -4 -14   6   40.40    3.52
   4 -14  -6   37.78    3.47
  -4  14   6   38.79    3.48
  -3 -14   6    9.31    1.46
  -3 -14   6    6.76    1.23
   3 -14  -6    9.13    1.47
  -3  14   6    8.55    1.51
  -2 -14   6    0.05    0.35
   2 -14  -6    0.50    0.45
  -2 -14   6    0.44    0.42
  -2  14   6   -0.27    0.49
  -1 -14   6    1.90    0.60
   1 -14  -6    1.97    0.81
   0 -14  -6   46.90    3.84
   0 -14   6   39.58    3.34
  -1 -14  -6    1.23    0.71
  -2 -14  -6    8.57    1.61
  -3 -14  -6    9.46    1.65
  -4 -14  -6   16.59    2.30
  -5 -14  -6   -0.16    0.48
   5 -15  -6   15.65    2.08
  -5 -15   6   14.14    2.06
  -5  15   6   18.01    2.29
  -4 -15   6    1.98    0.88
   4 -15  -6    3.63    1.02
  -4  15   6    2.74    0.98
  -3 -15   6   -0.02    0.40
   3 -15  -6   -0.02    0.48
  -2 -15   6    5.91    1.18
   2 -15  -6    4.93    1.17
   1 -15  -6    2.79    1.03
   0 -15  -6   -0.33    0.47
  -1 -15  -6    7.43    1.50
  -2 -15  -6    3.25    1.03
  -3 -15  -6    0.49    0.59
   2 -16  -6    5.54    1.27
   1 -16  -6   18.32    2.40
   0 -16  -6    6.87    1.47
  13   0  -7    2.89    1.06
 -13   0   7    4.47    1.04
  13   0  -7    4.13    1.20
  12   0  -7    0.72    0.68
 -12   0   7    0.11    0.51
 -12   0   7    0.08    0.47
  12   0  -7   -0.34    0.45
 -11   0   7  103.61    6.52
  11   0  -7   98.05    7.33
 -11   0   7   93.42    7.19
  11   0  -7   88.56    6.47
  10   0  -7   -0.32    0.27
 -10   0   7    1.19    0.54
 -10   0   7   -0.05    0.30
   9   0  -7    3.68    0.98
   9   0  -7    5.80    0.99
  -9   0   7    4.75    0.88
  -9   0   7    4.35    0.80
  -8   0   7    0.21    0.31
  -8   0   7    0.16    0.28
  -8   0   7   -0.16    0.39
   8   0  -7    0.26    0.43
  -7   0   7  127.99    8.19
   7   0  -7  126.80    9.20
  -7   0   7  129.79    9.27
  -7   0   7  137.29    8.63
  -6   0   7    0.67    0.30
  -6   0   7   -0.12    0.18
  -5   0   7   56.95    3.65
  -5   0   7   50.76    4.07
  -5   0   7   58.31    3.85
   5   0  -7   51.15    4.13
  -4   0   7    0.07    0.20
  -4   0   7   -0.20    0.15
  -4   0   7    0.16    0.19
   4   0  -7    0.02    0.20
  -3   0   7   19.53    1.52
  -3   0   7   20.06    1.61
  -3   0   7   18.50    1.67
   3   0  -7   20.87    1.80
  -2   0   7    0.20    0.21
  -2   0   7    0.04    0.18
   2   0  -7   -0.09    0.20
  -2   0   7    0.23    0.20
  -1   0   7   72.89    4.69
  -1   0   7   73.04    4.90
  -1   0   7   74.26    5.22
   1   0  -7   72.88    5.29
   0   0  -7   -0.11    0.21
   0   0   7   -0.09    0.33
   0   0   7   -0.05    0.15
   0   0   7    0.00    0.14
   0   0   7   -0.11    0.21
   1   0   7   12.72    1.30
   1   0   7   12.09    1.10
   1   0   7   10.89    1.25
  -1   0  -7   12.13    1.28
   2   0   7    0.02    0.15
   2   0   7   -0.16    0.39
   2   0   7   -0.24    0.20
  -2   0  -7   -0.05    0.22
  -3   0  -7   17.65    1.63
  -3   0  -7   16.04    1.77
   3   0   7   21.58    1.70
   3   0   7   20.50    1.58
   3   0   7   20.57    1.79
   4   0   7    1.04    0.46
  -4   0  -7   -0.14    0.25
  -5   0  -7   82.46    5.89
   5   0   7   73.41    5.21
   6   0   7   -0.05    0.36
  -6   0  -7   -0.13    0.33
   7   0   7    3.61    0.83
  -7   0  -7    2.18    0.72
   8   0   7   -0.22    0.38
  -8   0  -7    0.09    0.43
   9   0   7    9.89    1.54
  -9   0  -7   10.71    1.79
  10   0   7   -0.51    0.50
 -10   0  -7    0.15    0.62
  13  -1  -7    6.11    1.48
  13  -1  -7    8.47    1.52
 -13  -1   7    4.61    1.15
  13   1  -7    6.85    1.48
 -13   1   7    6.26    1.19
  13   1  -7    6.87    1.56
  12  -1  -7    0.73    0.65
  12  -1  -7    0.43    0.55
 -12  -1   7    0.28    0.59
 -12  -1   7    0.81    0.60
 -12   1   7    0.52    0.52
  12   1  -7    3.05    1.03
  12   1  -7    0.94    0.69
 -12   1   7    0.80    0.54
 -11  -1   7    0.93    0.59
 -11  -1   7    0.29    0.43
  11  -1  -7    1.31    0.68
  11  -1  -7    0.91    0.65
  11   1  -7    0.49    0.65
  11   1  -7    0.44    0.58
 -11   1   7    0.64    0.51
 -11   1   7    0.87    0.54
 -10  -1   7    9.38    1.31
 -10  -1   7   10.20    1.49
  10  -1  -7    7.41    1.27
 -10   1   7    7.48    1.21
  10   1  -7    7.84    1.32
 -10   1   7   11.86    1.57
  -9  -1   7   15.87    1.53
  -9  -1   7   15.77    1.93
   9  -1  -7   16.08    2.03
  -9  -1   7   16.36    1.78
   9   1  -7   18.39    2.12
  -9   1   7   14.97    1.68
   9   1  -7   13.28    1.65
   8  -1  -7    0.45    0.40
  -8  -1   7    0.09    0.35
  -8  -1   7    0.61    0.37
  -8   1   7    0.97    0.49
  -8   1   7   -0.04    0.28
  -8   1   7    0.34    0.34
   8   1  -7    0.51    0.46
  -7  -1   7    3.02    0.66
   7  -1  -7    2.52    0.70
  -7  -1   7    2.34    0.65
  -7  -1   7    4.13    0.71
  -7   1   7    2.25    0.54
  -7   1   7    4.19    0.72
   7   1  -7    3.27    0.77
  -6  -1   7   52.10    3.64
   6  -1  -7   53.24    4.15
  -6  -1   7   61.77    4.12
  -6  -1   7   54.91    3.86
  -6   1   7   53.81    3.66
   6   1  -7   49.51    4.12
  -6   1   7   53.01    4.13
  -6   1   7   54.07    3.83
  -5  -1   7   -0.05    0.19
  -5  -1   7    0.46    0.33
  -5  -1   7    0.48    0.34
   5  -1  -7    0.62    0.32
  -5   1   7    0.16    0.27
  -5   1   7    0.11    0.25
   5   1  -7    0.12    0.36
  -4  -1   7   42.65    3.41
  -4  -1   7   42.56    3.00
  -4  -1   7   45.27    3.22
   4  -1  -7   42.38    3.43
  -4   1   7   44.97    3.21
  -4   1   7   49.75    3.46
  -4   1   7   47.10    3.07
   4   1  -7   44.11    3.48
  -3  -1   7  144.38    9.54
  -3  -1   7  145.70    8.87
   3  -1  -7  152.16    8.96
   3  -1  -7  130.51    9.44
  -3  -1   7  137.44    8.42
  -3  -1   7  130.41    8.91
  -3   1   7  137.93    9.54
   3   1  -7  130.25    9.45
  -3   1   7  129.22    8.42
  -3   1   7  131.48    8.91
  -2  -1   7   63.55    4.70
  -2  -1   7   73.38    5.05
  -2  -1   7   71.94    4.75
  -2  -1   7   70.01    4.49
   2  -1  -7   74.55    5.12
   2   1  -7   76.90    5.13
  -2   1   7   66.90    4.50
  -2   1   7   69.60    5.05
  -2   1   7   69.11    4.73
  -1  -1   7   75.16    4.96
   1  -1  -7   75.26    5.28
  -1  -1   7   75.90    4.89
  -1  -1   7   68.18    4.64
  -1  -1   7   74.35    5.18
  -1   1   7   65.83    5.17
  -1   1   7   75.12    4.71
   1   1  -7   75.46    5.32
   0  -1  -7   13.93    1.33
   0  -1   7   12.85    1.10
   0  -1   7   11.01    1.11
   0  -1   7   15.14    1.29
   0  -1   7    9.97    1.18
   0   1   7   12.20    1.15
   0   1  -7   15.17    1.41
   0   1   7   12.87    1.16
   1  -1   7   34.85    2.35
  -1  -1  -7   28.41    2.62
   1  -1   7   33.33    2.46
   1  -1   7   29.93    2.33
   1  -1   7   34.64    2.53
   1   1   7   31.14    2.38
  -1   1  -7   36.79    2.76
   1   1   7   32.70    2.51
   2  -1   7   12.03    1.04
   2  -1   7   11.91    1.01
   2  -1   7   11.83    1.29
  -2  -1  -7   10.35    1.38
  -2  -1  -7   10.60    1.17
   2  -1   7   10.94    1.28
   2   1   7   13.53    1.12
   2   1   7   11.07    1.28
  -2   1  -7   11.56    1.47
  -3  -1  -7   89.10    6.79
  -3  -1  -7   97.11    6.24
   3  -1   7  102.52    6.53
   3  -1   7   86.60    6.05
  -3  -1  -7   88.86    6.65
   3   1   7   99.94    6.63
   3   1   7   89.27    6.09
  -3   1  -7  105.79    6.93
   4  -1   7    7.10    0.95
  -4  -1  -7    5.30    0.73
   4  -1   7    6.55    0.96
  -4  -1  -7    5.54    1.00
   4   1   7    6.37    1.00
  -4   1  -7    4.75    0.93
   5  -1   7    1.86    0.52
   5  -1   7    1.01    0.45
  -5  -1  -7    1.40    0.53
   5   1   7    2.35    0.63
  -5   1  -7    1.56    0.55
  -6  -1  -7    3.49    0.85
   6  -1   7    3.83    0.82
   6  -1   7    4.32    0.86
   6   1   7    4.41    0.93
  -6   1  -7    3.79    0.90
   7  -1   7  131.58    8.99
  -7  -1  -7  146.37   10.08
  -7   1  -7  145.53   10.12
   7   1   7  138.50    9.06
   8  -1   7   -0.08    0.43
  -8  -1  -7    0.68    0.49
  -8   1  -7    0.01    0.44
   8   1   7    0.10    0.41
   9  -1   7    8.77    1.40
  -9  -1  -7   10.07    1.68
  -9   1  -7    8.43    1.62
   9   1   7    6.34    1.30
  10  -1   7    6.92    1.33
 -10  -1  -7    8.03    1.68
  10   1   7    6.60    1.30
 -10   1  -7    8.63    1.67
  13  -2  -7    0.64    0.61
  13  -2  -7    1.99    0.95
 -13  -2   7    1.86    0.75
 -13  -2   7    1.94    0.75
  13   2  -7    2.62    0.99
  13   2  -7    1.77    0.97
 -13   2   7    3.83    1.12
 -12  -2   7    2.72    0.92
 -12  -2   7    3.32    0.87
  12  -2  -7    3.58    0.95
  12  -2  -7    2.04    0.87
 -12   2   7    3.47    1.04
  12   2  -7    2.52    0.95
  12   2  -7    3.37    1.07
  11  -2  -7   19.94    2.27
 -11  -2   7   16.78    2.07
 -11  -2   7   21.48    2.26
  11  -2  -7   24.87    2.47
  11   2  -7   18.95    2.24
  11   2  -7   21.69    2.71
 -11   2   7   22.64    2.36
 -11   2   7   25.19    2.29
  10  -2  -7    5.72    1.03
 -10  -2   7    3.65    0.84
  10  -2  -7    6.53    1.29
 -10  -2   7    6.20    1.21
  10   2  -7    4.41    0.98
 -10   2   7    4.58    1.02
 -10   2   7    4.34    0.95
  10   2  -7    4.24    1.03
  -9  -2   7    2.39    0.68
   9  -2  -7    2.36    0.78
  -9  -2   7    2.97    0.73
  -9  -2   7    2.68    0.68
   9   2  -7    2.91    0.88
   9   2  -7    2.68    0.70
  -9   2   7    3.38    0.74
   8  -2  -7   44.04    3.76
  -8  -2   7   53.47    3.52
  -8  -2   7   44.83    3.72
  -8  -2   7   44.26    3.27
  -8   2   7   57.56    3.68
   8   2  -7   35.89    3.65
  -8   2   7   43.61    3.31
  -7  -2   7    5.24    0.92
  -7  -2   7    7.40    1.12
  -7  -2   7    6.22    0.90
   7  -2  -7    6.18    1.07
  -7   2   7    4.98    0.84
   7   2  -7    5.88    1.04
  -6  -2   7    7.87    1.01
  -6  -2   7    5.62    0.97
  -6  -2   7    5.66    0.81
   6  -2  -7    6.17    1.00
  -6   2   7    5.34    0.81
  -6   2   7    5.30    0.91
   5  -2  -7   38.41    3.04
  -5  -2   7   39.81    2.67
  -5  -2   7   37.62    2.81
  -5  -2   7   36.90    3.02
  -5   2   7   33.84    2.64
  -5   2   7   39.90    2.97
   5   2  -7   39.84    3.11
   4  -2  -7   93.30    6.10
   4  -2  -7   82.24    5.56
  -4  -2   7   86.92    5.69
  -4  -2   7   84.61    5.33
  -4  -2   7   82.09    6.05
   4   2  -7   91.17    6.11
  -4   2   7   76.96    5.33
  -4   2   7   80.65    6.06
  -3  -2   7   27.73    2.26
   3  -2  -7   28.51    2.00
  -3  -2   7   28.43    2.13
  -3  -2   7   28.99    2.01
  -3  -2   7   27.11    2.09
   3  -2  -7   23.67    2.24
   3   2  -7   30.32    2.42
  -3   2   7   28.56    2.27
  -3   2   7   27.34    2.03
  -2  -2   7  104.50    7.42
  -2  -2   7  110.09    6.59
   2  -2  -7  110.25    7.44
  -2  -2   7   88.50    6.99
   2  -2  -7  117.38    7.01
  -2  -2   7  104.53    6.97
  -2   2   7  103.89    6.62
  -2   2   7  105.68    7.45
   2   2  -7  113.97    7.50
   1  -2  -7   61.25    4.29
  -1  -2   7   58.56    3.76
  -1  -2   7   53.63    4.14
  -1  -2   7   53.13    3.92
  -1  -2   7   61.42    4.04
   1   2  -7   59.27    4.33
  -1   2   7   57.61    3.81
  -1   2   7   57.76    4.20
   0  -2   7    9.46    0.99
   0  -2   7   12.74    1.18
   0  -2  -7   10.51    1.31
   0  -2   7   10.65    1.02
   0  -2   7   11.19    1.01
   0   2   7   10.55    1.06
   0   2  -7   13.65    1.56
   0   2   7   11.91    1.09
  -1  -2  -7    0.56    0.34
   1  -2   7    1.22    0.33
   1  -2   7    1.70    0.52
   1  -2   7    0.92    0.35
   1  -2   7    1.23    0.31
  -1   2  -7    1.31    0.56
   1   2   7    0.67    0.31
   1   2   7    0.60    0.28
  -2  -2  -7  100.92    7.18
   2  -2   7  103.50    7.00
   2  -2   7  104.13    6.47
   2  -2   7   98.70    6.61
  -2  -2  -7  102.28    7.24
   2  -2   7  102.82    6.92
  -2  -2  -7  105.19    6.72
   2   2   7  103.66    7.14
   2   2   7   96.09    6.49
  -2   2  -7  102.62    7.29
  -3  -2  -7   14.15    1.47
   3  -2   7   14.57    1.38
   3  -2   7   14.60    1.31
  -3  -2  -7   13.00    1.37
  -3  -2  -7   13.93    1.25
   3  -2   7   14.80    1.16
   3   2   7   12.32    1.43
  -3   2  -7   13.16    1.70
   3   2   7   14.60    1.28
   4  -2   7   11.59    1.32
  -4  -2  -7   10.33    1.00
  -4  -2  -7   12.86    1.54
  -4  -2  -7    8.03    1.13
   4  -2   7   14.14    1.46
   4   2   7   10.08    1.05
  -4   2  -7    9.63    1.41
   4   2   7   11.28    1.36
   5  -2   7    7.85    1.14
  -5  -2  -7    8.73    1.32
   5  -2   7    7.80    1.11
  -5   2  -7    6.98    1.27
   5   2   7    9.31    1.29
   6  -2   7   51.86    3.58
  -6  -2  -7   48.18    3.95
   6  -2   7   47.49    3.70
  -6   2  -7   44.46    3.95
   6   2   7   50.25    3.62
  -7  -2  -7    5.23    1.09
   7  -2   7    2.63    0.71
   7  -2   7    5.54    0.97
   7   2   7    2.99    0.85
  -7   2  -7    4.07    0.99
   8  -2   7   16.67    2.14
  -8  -2  -7   25.69    2.42
   8  -2   7   23.59    2.14
   8   2   7   21.80    2.41
  -8   2  -7   25.04    2.46
  -9  -2  -7    3.02    1.02
   9  -2   7    3.09    0.81
  -9   2  -7    3.32    1.06
   9   2   7    3.53    0.98
 -10  -2  -7    1.94    0.89
  10  -2   7    3.66    0.97
 -10   2  -7    4.69    1.36
  10   2   7    1.08    0.65
  13  -3  -7    0.52    0.72
 -13  -3   7    0.60    0.57
  13  -3  -7   -0.04    0.63
 -13  -3   7    1.32    0.72
  13   3  -7    0.60    0.71
 -13   3   7    0.52    0.68
  13   3  -7    0.67    0.78
 -12  -3   7   23.49    2.07
  12  -3  -7   16.05    2.40
 -12  -3   7   19.48    2.46
  12  -3  -7   20.43    2.31
  12   3  -7   22.44    2.78
  12   3  -7   19.92    2.43
 -12   3   7   19.32    2.29
 -11  -3   7    1.18    0.61
 -11  -3   7    0.31    0.52
  11  -3  -7    0.81    0.63
  11  -3  -7    1.06    0.55
 -11   3   7    0.80    0.62
 -11   3   7    0.34    0.54
  11   3  -7    0.86    0.64
  11   3  -7    0.94    0.63
  10  -3  -7   58.57    4.04
 -10  -3   7   50.36    4.36
 -10  -3   7   55.93    3.92
  10  -3  -7   53.70    4.45
 -10   3   7   53.43    4.39
 -10   3   7   52.64    3.93
  10   3  -7   55.96    4.51
  10   3  -7   52.06    3.94
  -9  -3   7    8.94    1.21
  -9  -3   7    7.05    1.09
   9  -3  -7    7.27    1.31
   9   3  -7    7.28    1.16
  -9   3   7    6.66    1.10
   8  -3  -7   16.81    2.07
  -8  -3   7   17.18    1.60
  -8  -3   7   16.68    1.53
  -8  -3   7   12.83    1.82
  -8   3   7   16.74    1.59
  -8   3   7   21.05    1.76
   8   3  -7   17.04    2.05
   8   3  -7   18.40    1.64
  -7  -3   7    0.20    0.26
  -7  -3   7    1.34    0.46
   7  -3  -7    0.07    0.30
  -7   3   7    1.06    0.41
  -7   3   7   -0.30    0.47
   7   3  -7    1.15    0.50
   6  -3  -7   96.65    6.70
  -6  -3   7   92.42    6.75
  -6  -3   7   96.67    6.29
  -6  -3   7   98.54    5.92
  -6   3   7   95.05    5.96
  -6   3   7   92.63    6.70
   6   3  -7   76.39    6.62
  -5  -3   7    4.67    0.82
  -5  -3   7    5.95    0.77
   5  -3  -7    5.83    0.92
  -5  -3   7    4.48    0.77
  -5   3   7    5.68    0.82
  -5   3   7    6.14    0.94
   5   3  -7    4.60    0.92
  -4  -3   7   27.07    2.23
   4  -3  -7   27.10    2.27
  -4  -3   7   26.81    2.09
  -4  -3   7   26.83    1.94
  -4   3   7   25.15    2.21
   4   3  -7   25.44    2.29
  -4   3   7   27.15    1.99
  -3  -3   7   -0.15    0.18
  -3  -3   7   -0.07    0.24
   3  -3  -7    0.18    0.24
  -3  -3   7   -0.05    0.17
  -3  -3   7   -0.28    0.33
  -3   3   7    0.21    0.21
   3   3  -7    0.39    0.42
  -3   3   7    0.06    0.20
  -2  -3   7   58.84    4.13
  -2  -3   7   62.91    3.96
  -2  -3   7   48.14    3.82
   2  -3  -7   54.67    3.81
   2  -3  -7   56.82    4.16
  -2  -3   7   56.25    3.63
  -2   3   7   56.52    3.72
  -2   3   7   55.80    4.15
   2   3  -7   55.89    4.18
  -1  -3   7   19.55    1.57
  -1  -3   7   20.19    1.68
  -1  -3   7   16.45    1.45
  -1  -3   7   23.28    1.69
   1  -3  -7   19.53    1.75
  -1   3   7   18.54    1.68
  -1   3   7   18.99    1.57
   1   3  -7   21.84    1.91
   0  -3  -7  113.93    7.41
   0  -3   7  120.98    7.78
   0  -3   7  108.60    7.31
   0  -3   7  115.52    7.52
   0  -3  -7  115.88    7.84
   0  -3   7  102.81    6.93
   0   3   7  116.10    7.08
   0   3  -7  104.04    7.90
   0   3   7  112.52    7.87
  -1  -3  -7    0.38    0.29
  -1  -3  -7    0.43    0.34
   1  -3   7    0.55    0.26
   1  -3   7    0.49    0.22
   1  -3   7    0.92    0.40
   1  -3   7    0.25    0.22
   1   3   7    0.50    0.28
   1   3   7   -0.06    0.25
  -1   3  -7    0.48    0.39
   2  -3   7   17.41    1.44
   2  -3   7   22.28    1.71
  -2  -3  -7   18.63    1.56
  -2  -3  -7   18.08    1.71
   2  -3   7   17.99    1.51
  -2  -3  -7   17.41    1.71
   2   3   7   18.00    1.61
   2   3   7   20.52    1.64
  -2   3  -7   18.30    1.86
  -3  -3  -7    9.38    1.03
  -3  -3  -7   10.07    1.29
   3  -3   7    7.33    1.02
   3  -3   7    7.94    1.02
  -3  -3  -7    5.80    1.06
   3  -3   7    8.42    0.77
   3   3   7    7.90    0.99
  -3   3  -7    6.93    1.22
   3   3   7    8.74    1.13
  -4  -3  -7  110.42    7.61
   4  -3   7  108.26    7.29
  -4  -3  -7   94.12    7.52
   4  -3   7  114.09    6.85
   4   3   7  105.39    7.49
   4   3   7  116.18    6.99
  -4   3  -7  102.86    7.67
   5  -3   7    0.34    0.32
   5  -3   7    0.01    0.28
  -5  -3  -7   -0.43    0.18
  -5   3  -7    0.32    0.37
   5   3   7    0.52    0.40
   6  -3   7   37.73    3.17
  -6  -3  -7   39.27    3.38
   6  -3   7   40.05    3.04
   6   3   7   41.47    3.17
  -6   3  -7   45.87    3.60
   7  -3   7   18.81    1.95
   7  -3   7   18.46    2.08
  -7  -3  -7   21.96    2.19
   7   3   7   22.34    2.33
  -7   3  -7   24.26    2.33
  -8  -3  -7   23.10    2.50
   8  -3   7   17.13    1.99
   8  -3   7   18.58    2.04
   8   3   7   14.65    2.04
  -8   3  -7   15.15    2.21
   9  -3   7    0.25    0.45
  -9  -3  -7   -0.96    0.47
   9  -3   7    0.38    0.44
   9   3   7    0.27    0.60
  -9   3  -7   -0.27    0.51
 -10  -3  -7   17.99    2.41
  10  -3   7   15.86    2.04
  10   3   7   14.04    2.16
 -10   3  -7   16.52    2.52
 -13  -4   7    0.78    0.57
  13  -4  -7    0.16    0.59
 -13  -4   7    0.56    0.65
  13   4  -7    0.58    0.68
 -13   4   7    0.19    0.80
  13   4  -7    0.79    0.88
  12  -4  -7   12.61    1.74
 -12  -4   7   10.10    1.71
 -12  -4   7   10.47    1.52
 -12   4   7    8.32    1.52
  12   4  -7   10.94    1.69
  12   4  -7   12.26    1.98
 -11  -4   7    0.55    0.61
  11  -4  -7    0.68    0.71
 -11  -4   7    0.52    0.42
  11  -4  -7    0.73    0.52
 -11   4   7    0.62    0.66
  11   4  -7    0.90    0.69
  11   4  -7    0.21    0.59
 -11   4   7    0.22    0.51
  10  -4  -7    8.92    1.34
 -10  -4   7    7.41    1.36
 -10  -4   7    8.34    1.35
 -10  -4   7    8.69    1.33
  10  -4  -7    8.81    1.49
 -10   4   7    9.52    1.31
  10   4  -7   10.33    1.66
  10   4  -7    7.07    1.22
  -9  -4   7    0.06    0.39
  -9  -4   7   -0.05    0.36
  -9  -4   7    0.33    0.44
   9  -4  -7    0.60    0.50
  -9   4   7    0.79    0.43
   9   4  -7    0.30    0.55
   9   4  -7    0.06    0.32
  -8  -4   7   22.86    2.03
   8  -4  -7   21.63    2.21
  -8  -4   7   26.58    2.33
  -8  -4   7   20.25    1.87
   8  -4  -7   23.90    2.04
  -8   4   7   22.89    1.98
  -8   4   7   29.55    2.17
   8   4  -7   19.55    1.90
   8   4  -7   24.95    2.33
  -7  -4   7    0.45    0.30
   7  -4  -7    0.70    0.42
  -7  -4   7    0.31    0.34
  -7   4   7    0.25    0.37
  -7   4   7    0.27    0.34
  -6  -4   7   13.40    1.18
   6  -4  -7   12.95    1.58
  -6  -4   7   11.01    1.46
  -6  -4   7   10.89    1.33
  -6   4   7   15.53    1.40
  -6   4   7   12.23    1.33
   6   4  -7   11.46    1.56
  -5  -4   7   32.20    2.39
  -5  -4   7   36.82    2.64
  -5  -4   7   34.38    2.80
   5  -4  -7   34.83    2.78
  -5   4   7   30.40    2.74
  -5   4   7   34.58    2.49
   5   4  -7   35.44    2.86
  -4  -4   7   80.37    5.20
  -4  -4   7   81.44    5.99
  -4  -4   7   83.27    5.60
   4  -4  -7   78.06    5.91
  -4   4   7   77.57    5.27
  -4   4   7   93.78    5.97
   4   4  -7   83.62    5.99
  -3  -4   7   11.39    1.21
  -3  -4   7   12.09    1.04
   3  -4  -7   10.47    1.28
  -3  -4   7   11.46    1.27
   3  -4  -7   14.13    1.32
  -3  -4   7   13.71    1.20
  -3   4   7   12.73    1.14
   3   4  -7   11.74    1.46
  -3   4   7   11.62    1.27
   2  -4  -7   79.82    5.51
   2  -4  -7   85.57    5.81
  -2  -4   7   81.96    5.09
  -2  -4   7   79.78    5.80
  -2  -4   7   85.66    5.48
  -2  -4   7   77.10    5.53
   2   4  -7   82.50    5.88
  -2   4   7   76.97    5.18
  -2   4   7   82.10    5.85
  -1  -4   7   17.25    1.48
  -1  -4   7   16.79    1.27
   1  -4  -7   14.50    1.36
  -1  -4   7   15.13    1.33
  -1  -4   7   14.79    1.37
   1  -4  -7   17.43    1.53
  -1   4   7   13.16    1.29
  -1   4   7   16.92    1.49
   1   4  -7   14.63    1.75
   0  -4   7   10.51    1.04
   0  -4  -7   11.78    1.15
   0  -4   7   10.40    0.98
   0  -4  -7   12.34    1.21
   0  -4   7   12.49    1.07
   0  -4   7   12.04    1.20
   0   4  -7   10.60    1.45
   0   4   7   10.53    1.23
   0   4   7   10.77    1.15
   1  -4   7   25.50    1.87
  -1  -4  -7   21.63    1.88
  -1  -4  -7   29.09    2.13
   1  -4   7   26.61    1.97
   1  -4   7   22.93    1.77
   1  -4   7   23.90    1.82
  -1  -4  -7   21.73    2.04
  -1   4  -7   21.57    2.17
   1   4   7   21.88    1.98
   1   4   7   23.79    1.89
   2  -4   7  171.50   10.68
   2  -4   7  157.61    9.88
   2  -4   7  153.75   10.32
  -2  -4  -7  167.98   10.47
  -2  -4  -7  167.61   11.10
  -2  -4  -7  146.59   11.16
  -2   4  -7  184.57   11.29
   2   4   7  151.39    9.99
   2   4   7  157.45   11.14
   3  -4   7   14.34    1.21
  -3  -4  -7   16.10    1.53
  -3  -4  -7   14.64    1.65
   3  -4   7   13.73    1.29
   3  -4   7   15.75    1.43
  -3  -4  -7   14.35    1.32
   3   4   7   13.75    1.37
   3   4   7   12.77    1.49
  -3   4  -7   13.83    1.73
   4  -4   7   13.50    1.41
  -4  -4  -7   13.90    1.55
  -4  -4  -7   11.76    1.54
   4  -4   7   13.00    1.47
  -4  -4  -7   10.77    1.25
   4   4   7   12.78    1.44
   4   4   7   12.69    1.49
  -4   4  -7    8.28    1.51
  -5  -4  -7   48.78    3.76
  -5  -4  -7   37.46    3.56
   5  -4   7   51.82    3.60
   5  -4   7   45.99    3.33
  -5   4  -7   47.52    3.88
   5   4   7   52.13    3.54
   6  -4   7   65.13    4.53
  -6  -4  -7   69.05    5.07
   6  -4   7   64.05    4.81
  -6   4  -7   61.46    5.16
   6   4   7   70.20    4.74
   7  -4   7    0.64    0.47
   7  -4   7    0.03    0.39
  -7  -4  -7    0.53    0.45
  -7   4  -7    0.41    0.42
   7   4   7    0.80    0.52
   8  -4   7   54.30    4.03
   8  -4   7   53.89    4.22
  -8  -4  -7   56.52    4.47
   8   4   7   52.70    4.14
  -8   4  -7   54.52    4.59
  -9  -4  -7   23.27    2.64
   9  -4   7   16.58    2.07
   9  -4   7   21.07    2.10
   9   4   7   19.29    2.41
  -9   4  -7   17.40    2.52
 -10  -4  -7    2.61    0.95
  10  -4   7    3.63    0.99
  10   4   7    1.80    1.04
 -10   4  -7    2.99    1.13
 -12  -5   7   14.85    2.14
  12  -5  -7   15.56    2.05
  12  -5  -7   14.14    2.20
 -12  -5   7   15.43    1.89
  12   5  -7   19.32    2.47
 -12   5   7   13.41    1.96
  12   5  -7   14.76    1.91
  11  -5  -7    2.24    0.75
 -11  -5   7    3.14    0.94
  11  -5  -7    3.15    1.04
 -11  -5   7    1.61    0.63
 -11   5   7    3.70    1.01
  11   5  -7    2.59    0.96
  11   5  -7    2.28    0.94
 -10  -5   7   28.15    2.54
  10  -5  -7   33.04    2.64
 -10  -5   7   30.08    2.85
 -10  -5   7   32.02    2.51
  10  -5  -7   33.44    2.96
  10   5  -7   30.68    2.94
 -10   5   7   25.41    2.43
  10   5  -7   29.98    2.53
 -10   5   7   29.86    2.75
  -9  -5   7   40.02    3.14
   9  -5  -7   38.88    3.41
  -9  -5   7   40.78    3.48
  -9  -5   7   40.02    2.98
   9   5  -7   40.49    3.05
  -9   5   7   40.57    3.40
   9   5  -7   41.00    3.48
  -9   5   7   37.28    3.00
   8  -5  -7    2.45    0.71
  -8  -5   7    1.90    0.59
   8  -5  -7    2.23    0.62
  -8  -5   7    1.65    0.53
   8   5  -7    2.55    0.77
   8   5  -7    2.30    0.62
  -8   5   7    1.76    0.56
  -8   5   7    3.05    0.76
  -7  -5   7   22.49    1.75
   7  -5  -7   19.01    1.97
   7  -5  -7   21.36    1.85
  -7  -5   7   21.10    2.04
  -7  -5   7   18.67    1.83
   7   5  -7   21.34    2.14
  -7   5   7   19.64    1.77
   7   5  -7   19.68    1.74
  -7   5   7   25.36    1.93
   6  -5  -7   76.52    5.21
  -6  -5   7   78.55    4.87
  -6  -5   7   65.95    5.54
  -6  -5   7   81.13    5.24
   6  -5  -7   71.09    5.49
   6   5  -7   76.11    5.57
  -6   5   7   77.68    4.95
  -6   5   7   71.68    5.53
  -5  -5   7   24.24    2.14
   5  -5  -7   24.65    2.12
  -5  -5   7   22.61    1.78
   5  -5  -7   24.50    2.01
  -5  -5   7   22.64    1.98
   5   5  -7   23.78    2.20
  -5   5   7   21.92    2.11
  -5   5   7   26.76    1.94
  -4  -5   7    5.48    0.89
  -4  -5   7    5.67    0.74
   4  -5  -7    5.65    0.84
   4  -5  -7    4.89    0.85
  -4  -5   7    6.17    0.88
  -4   5   7    4.86    0.76
   4   5  -7    4.39    0.90
  -3  -5   7   62.42    4.71
   3  -5  -7   70.84    4.96
  -3  -5   7   67.83    4.31
  -3  -5   7   68.13    5.00
   3  -5  -7   67.83    4.74
  -3  -5   7   69.49    4.70
  -3   5   7   61.69    4.99
  -3   5   7   71.40    4.47
   3   5  -7   74.31    5.04
   2  -5  -7   98.15    6.90
  -2  -5   7   96.76    6.54
  -2  -5   7  104.33    6.68
  -2  -5   7   96.37    6.07
   2  -5  -7  102.75    6.66
  -2  -5   7  104.50    6.98
   2   5  -7   91.73    6.97
  -2   5   7   93.96    7.02
  -2   5   7   96.53    6.22
   1  -5  -7    1.10    0.43
   1  -5  -7    0.94    0.40
  -1  -5   7    1.22    0.49
  -1  -5   7    1.13    0.33
  -1  -5   7    0.85    0.36
  -1  -5   7    1.07    0.35
  -1   5   7    1.08    0.39
  -1   5   7    0.93    0.40
   1   5  -7    1.24    0.54
   0  -5   7   16.86    1.42
   0  -5   7   15.14    1.23
   0  -5  -7   15.10    1.53
   0  -5   7   15.21    1.34
   0  -5  -7   12.93    1.36
   0  -5   7   16.09    1.37
   0  -5  -7   14.71    1.45
   0   5   7   16.78    1.50
   0   5   7   15.73    1.38
   0   5  -7   15.52    1.61
   1  -5   7  100.92    6.22
  -1  -5  -7   97.39    6.97
   1  -5   7  102.79    6.90
  -1  -5  -7  103.93    6.67
  -1  -5  -7   93.74    7.13
   1  -5   7  103.05    6.77
   1  -5   7   96.80    6.53
  -1   5  -7   96.09    7.14
   1   5   7   95.59    6.33
   1   5   7  102.60    7.11
   2  -5   7   22.41    1.96
  -2  -5  -7   24.79    2.09
   2  -5   7   20.98    1.77
  -2  -5  -7   31.02    2.11
  -2  -5  -7   22.45    1.91
   2  -5   7   24.76    1.81
  -2   5  -7   23.74    2.26
   2   5   7   20.45    1.88
   2   5   7   21.57    2.01
   3  -5   7   18.60    1.63
   3  -5   7   21.66    1.57
  -3  -5  -7   16.74    1.67
   3  -5   7   16.77    1.41
  -3  -5  -7   14.84    1.80
  -3  -5  -7   17.27    1.57
  -3   5  -7   19.81    1.90
   3   5   7   17.34    1.62
   3   5   7   17.33    1.65
   4  -5   7    5.23    0.82
  -4  -5  -7    2.93    0.71
  -4  -5  -7    3.07    0.77
   4  -5   7    2.68    0.60
  -4  -5  -7    3.16    0.64
   4   5   7    3.34    0.72
   4   5   7    4.18    0.83
  -5  -5  -7    5.88    0.99
   5  -5   7    4.77    0.86
  -5  -5  -7    5.94    1.07
   5  -5   7    4.67    0.89
   5   5   7    5.43    1.00
  -6  -5  -7   16.70    1.84
   6  -5   7   12.02    1.42
   6  -5   7   12.23    1.47
   6   5   7   14.18    1.71
  -6   5  -7    7.09    1.52
  -7  -5  -7   50.14    3.94
   7  -5   7   49.96    3.79
   7  -5   7   45.95    3.52
   7   5   7   49.27    3.76
  -7   5  -7   44.98    4.07
   8  -5   7    0.15    0.41
  -8  -5  -7   -0.23    0.48
   8  -5   7    0.39    0.46
  -8   5  -7    0.14    0.49
   8   5   7    0.86    0.64
  -9  -5  -7    1.61    0.79
   9  -5   7    1.80    0.73
   9   5   7    0.05    0.68
  -9   5  -7    1.90    0.93
  10  -5   7   12.06    1.70
 -10   5  -7   10.93    1.99
  10   5   7    6.22    1.49
 -12  -6   7   -0.17    0.45
  12  -6  -7   -0.24    0.62
 -12  -6   7    0.16    0.57
  12  -6  -7    0.52    0.56
  12   6  -7   -0.37    0.64
  12   6  -7    0.68    0.67
 -12   6   7   -0.43    0.57
  11  -6  -7   37.02    3.08
  11  -6  -7   39.40    3.45
 -11  -6   7   35.45    2.86
 -11  -6   7   34.64    3.37
 -11   6   7   32.89    2.97
  11   6  -7   37.98    3.05
  11   6  -7   37.83    3.46
  10  -6  -7    0.59    0.51
 -10  -6   7    0.86    0.58
 -10  -6   7    1.36    0.57
  10  -6  -7    0.99    0.54
 -10   6   7    0.21    0.51
  10   6  -7    1.52    0.60
  10   6  -7    0.20    0.65
 -10   6   7    0.68    0.54
   9  -6  -7    7.79    1.39
  -9  -6   7    7.84    1.24
  -9  -6   7    9.72    1.27
  -9  -6   7    7.75    1.38
  -9   6   7    8.24    1.23
  -9   6   7    7.55    1.30
   9   6  -7    7.76    1.16
   9   6  -7   11.65    1.65
  -8  -6   7    0.30    0.36
  -8  -6   7    0.28    0.48
   8  -6  -7    0.23    0.43
   8  -6  -7    0.58    0.42
  -8  -6   7    0.37    0.38
  -8   6   7    0.04    0.47
  -8   6   7    0.20    0.33
   8   6  -7    0.77    0.62
   8   6  -7    0.20    0.33
   7  -6  -7   14.61    1.75
  -7  -6   7   11.35    1.44
  -7  -6   7   11.57    1.59
   7  -6  -7   14.05    1.57
  -7  -6   7   14.06    1.25
   7   6  -7   13.03    1.39
  -7   6   7   14.32    1.49
  -7   6   7   13.16    1.48
   7   6  -7    9.14    1.64
  -6  -6   7    0.77    0.36
  -6  -6   7    0.49    0.28
   6  -6  -7    0.79    0.40
   6  -6  -7    0.87    0.45
  -6  -6   7    0.47    0.39
  -6   6   7    0.93    0.42
  -6   6   7    0.11    0.35
   6   6  -7    0.11    0.52
   5  -6  -7   73.67    5.22
  -5  -6   7   70.88    5.54
   5  -6  -7   70.91    5.43
  -5  -6   7   74.32    5.20
  -5  -6   7   71.14    4.75
  -5   6   7   76.22    4.92
   5   6  -7   71.87    5.51
  -5   6   7   88.69    5.52
  -4  -6   7   -0.01    0.25
  -4  -6   7    0.01    0.24
  -4  -6   7   -0.05    0.19
   4  -6  -7   -0.13    0.26
   4  -6  -7    0.26    0.31
  -4   6   7    0.09    0.28
   4   6  -7    0.48    0.47
  -3  -6   7    0.48    0.24
  -3  -6   7    0.20    0.29
   3  -6  -7   -0.18    0.23
  -3  -6   7    0.43    0.32
  -3  -6   7    0.89    0.50
   3  -6  -7    0.19    0.28
   3   6  -7    0.44    0.54
  -3   6   7    0.44    0.27
  -3   6   7    0.66    0.29
   2  -6  -7   22.76    1.96
  -2  -6   7   24.26    1.64
  -2  -6   7   26.02    2.01
   2  -6  -7   23.19    2.07
   2  -6  -7   20.12    1.87
  -2  -6   7   21.97    1.95
  -2  -6   7   21.81    1.86
  -2   6   7   20.27    1.76
   2   6  -7   24.53    2.16
  -2   6   7   23.73    2.04
  -1  -6   7   96.43    6.65
  -1  -6   7  103.82    7.06
  -1  -6   7   96.30    6.14
   1  -6  -7  104.86    7.19
   1  -6  -7   94.10    6.70
   1  -6  -7  103.89    7.00
  -1  -6   7  101.46    6.79
   1   6  -7  103.64    7.19
  -1   6   7   96.67    7.15
  -1   6   7   99.97    6.36
   0  -6  -7    0.19    0.33
   0  -6   7    1.00    0.34
   0  -6   7    0.20    0.24
   0  -6   7    0.16    0.21
   0  -6  -7    0.44    0.28
   0  -6  -7    0.40    0.30
   0  -6   7    0.34    0.26
   0   6   7    0.16    0.24
   0   6   7    0.63    0.32
   0   6  -7    0.30    0.49
   1  -6   7   64.20    4.88
   1  -6   7   72.38    4.65
  -1  -6  -7   81.34    5.31
  -1  -6  -7   73.69    5.43
   1  -6   7   80.64    5.15
  -1  -6  -7   73.80    5.06
   1   6   7   67.95    5.35
  -1   6  -7   76.00    5.43
   1   6   7   70.03    4.82
   2  -6   7    5.85    0.78
  -2  -6  -7    6.13    0.89
  -2  -6  -7    4.83    0.87
   2  -6   7    4.33    0.71
  -2  -6  -7    5.41    0.98
   2  -6   7    4.46    0.76
  -2   6  -7    6.01    1.06
   2   6   7    7.29    1.06
   2   6   7    5.43    0.92
   3  -6   7   67.58    4.42
  -3  -6  -7   64.31    5.03
   3  -6   7   69.34    4.82
  -3  -6  -7   71.51    4.74
  -3  -6  -7   62.18    4.90
   3   6   7   72.17    4.66
  -3   6  -7   67.88    5.11
   3   6   7   65.47    5.02
  -4  -6  -7   10.37    1.39
   4  -6   7   10.49    1.26
   4  -6   7   10.58    1.19
  -4  -6  -7   10.33    1.23
  -4  -6  -7   10.47    1.34
  -4   6  -7    7.06    1.53
   4   6   7   10.44    1.39
   4   6   7    8.00    1.21
   5  -6   7  115.73    8.31
  -5  -6  -7  131.23    8.85
   5  -6   7  124.03    7.75
   5   6   7  122.52    7.95
  -5   6  -7  117.88    8.84
   6  -6   7    7.50    1.11
   6  -6   7    5.87    0.97
  -6  -6  -7    4.55    1.01
  -6   6  -7    5.85    1.23
   6   6   7    4.93    1.03
   7  -6   7    0.59    0.47
   7  -6   7    0.36    0.46
   7   6   7    0.12    0.42
  -7   6  -7    0.60    0.56
   8  -6   7    5.03    1.00
   8  -6   7    5.70    1.11
   8   6   7    4.70    1.14
  -8   6  -7    5.27    1.25
   9  -6   7   41.23    3.45
  -9   6  -7   48.41    4.19
   9   6   7   44.17    3.72
  12  -7  -7    0.09    0.63
  12  -7  -7    1.07    0.66
 -12  -7   7    1.15    0.76
 -12  -7   7   -0.17    0.46
  12   7  -7    0.59    0.75
 -12   7   7   -0.16    0.69
  11  -7  -7    1.14    0.68
  11  -7  -7    0.96    0.67
 -11  -7   7    0.16    0.47
 -11  -7   7    1.34    0.74
  11   7  -7    1.61    0.81
  11   7  -7    0.33    0.57
 -11   7   7    0.68    0.67
 -10  -7   7    0.00    0.42
  10  -7  -7    0.11    0.54
 -10  -7   7    0.15    0.47
  10  -7  -7    0.85    0.55
 -10   7   7    0.27    0.52
  10   7  -7   -0.09    0.63
  10   7  -7   -0.01    0.49
  -9  -7   7   49.21    3.54
  -9  -7   7   46.91    4.17
   9  -7  -7   53.95    4.17
  -9   7   7   55.86    4.04
  -9   7   7   50.63    3.67
   9   7  -7   51.74    4.22
   9   7  -7   41.79    3.53
  -8  -7   7    1.72    0.58
   8  -7  -7    3.30    0.76
   8  -7  -7    1.70    0.65
  -8  -7   7    2.63    0.76
  -8  -7   7    2.73    0.75
  -8   7   7    2.25    0.73
  -8   7   7    3.88    0.78
   8   7  -7    1.54    0.54
   8   7  -7    2.87    0.96
  -7  -7   7   31.68    2.51
  -7  -7   7   30.92    2.73
   7  -7  -7   29.01    2.43
  -7  -7   7   26.72    2.19
   7  -7  -7   33.12    2.67
  -7   7   7   30.55    2.61
   7   7  -7   31.40    2.74
   7   7  -7   23.78    2.17
  -7   7   7   31.16    2.36
   6  -7  -7    0.53    0.43
  -6  -7   7    0.48    0.35
   6  -7  -7    0.30    0.35
  -6  -7   7    0.18    0.35
  -6   7   7    0.44    0.34
   6   7  -7    0.51    0.34
   6   7  -7    0.56    0.57
   5  -7  -7   32.02    2.64
  -5  -7   7   32.86    2.55
  -5  -7   7   31.56    2.74
   5  -7  -7   29.43    2.50
   5   7  -7   30.07    2.75
  -5   7   7   33.18    2.40
   4  -7  -7    2.95    0.71
   4  -7  -7    2.07    0.58
   4  -7  -7    1.82    0.56
  -4  -7   7    1.50    0.52
  -4  -7   7    2.70    0.67
  -4   7   7    2.05    0.52
  -4   7   7    1.48    0.67
   4   7  -7    2.11    0.75
   3  -7  -7  170.20   11.03
  -3  -7   7  167.65   11.00
   3  -7  -7  184.57   11.53
   3  -7  -7  173.72   11.85
  -3  -7   7  159.86   11.70
  -3  -7   7  142.52   11.07
  -3   7   7  170.16   11.77
   3   7  -7  175.26   11.64
  -3   7   7  176.61   10.39
   2  -7  -7    0.23    0.27
   2  -7  -7    0.20    0.33
  -2  -7   7    0.32    0.27
  -2  -7   7    0.18    0.31
   2  -7  -7    0.21    0.27
  -2  -7   7    0.26    0.30
  -2   7   7   -0.01    0.31
   2   7  -7   -0.08    0.39
  -2   7   7    0.05    0.25
  -1  -7   7    5.94    0.86
   1  -7  -7    5.62    0.85
   1  -7  -7    3.76    0.80
  -1  -7   7    4.44    0.74
  -1  -7   7    5.08    0.79
   1  -7  -7    3.83    0.73
   1   7  -7    5.05    0.98
  -1   7   7    5.82    0.88
  -1   7   7    4.74    0.87
   0  -7  -7   13.88    1.35
   0  -7   7   11.81    1.22
   0  -7   7   12.76    1.30
   0  -7  -7   15.25    1.43
   0  -7   7   13.98    1.27
   0   7  -7   14.00    1.75
   0   7   7   10.41    1.42
   0   7   7   11.94    1.35
  -1  -7  -7   79.93    5.79
   1  -7   7   81.89    5.41
  -1  -7  -7   71.32    5.30
   1  -7   7   78.29    5.22
  -1   7  -7   80.71    5.79
   1   7   7   75.90    5.09
   1   7   7   71.48    5.66
  -2  -7  -7    1.04    0.44
   2  -7   7    0.13    0.26
   2  -7   7    0.33    0.29
  -2  -7  -7    0.24    0.34
   2   7   7    0.05    0.29
   2   7   7   -0.07    0.31
  -2   7  -7    0.10    0.49
  -3  -7  -7   13.30    1.94
  -3  -7  -7   20.39    1.73
   3  -7   7   21.48    1.78
   3   7   7   19.28    1.85
   3   7   7   19.80    1.76
  -3   7  -7   18.68    1.94
   4  -7   7    6.25    1.00
  -4  -7  -7    8.66    1.15
  -4  -7  -7    7.71    1.25
   4   7   7    7.80    1.19
   5  -7   7    6.24    1.01
  -5  -7  -7    7.73    1.26
  -5   7  -7    5.02    1.21
   5   7   7    6.98    1.14
   6  -7   7   17.59    1.84
  -6  -7  -7   19.17    2.30
   6   7   7   18.26    2.13
  -6   7  -7   23.77    2.07
   7  -7   7   50.92    4.12
  -7   7  -7   56.54    4.56
   7   7   7   54.12    4.12
   8   7   7    2.57    0.99
  -8   7  -7    2.51    0.96
  -9   7  -7    3.32    1.10
   9   7   7    2.48    1.10
 -11  -8   7   25.96    2.76
  11  -8  -7   24.87    2.40
  11  -8  -7   25.76    2.73
 -11   8   7   27.84    2.54
 -10  -8   7    6.09    1.41
  10  -8  -7   13.05    1.66
  10  -8  -7   10.21    1.70
 -10   8   7    9.12    1.46
  -9  -8   7    8.76    1.45
   9  -8  -7    9.71    1.58
  -9   8   7    7.87    1.33
  -9   8   7   11.18    1.50
   8  -8  -7   53.74    4.23
   8  -8  -7   46.86    3.86
  -8  -8   7   52.84    4.36
  -8   8   7   56.51    4.30
  -8   8   7   53.60    3.82
  -7  -8   7   13.49    1.78
   7  -8  -7   10.89    1.57
  -7  -8   7   11.22    1.52
   7  -8  -7   13.51    1.57
  -7   8   7   14.26    1.53
  -6  -8   7    0.54    0.43
  -6  -8   7    0.63    0.43
   6  -8  -7    0.67    0.43
   6  -8  -7    1.50    0.51
   6  -8  -7    1.44    0.54
   6   8  -7    0.98    0.64
  -6   8   7    0.55    0.39
  -5  -8   7   33.20    2.96
   5  -8  -7   37.70    3.06
   5  -8  -7   35.95    2.81
   5  -8  -7   38.20    2.95
  -5  -8   7   31.27    2.76
   5   8  -7   33.22    2.98
  -5   8   7   38.47    2.68
  -5   8   7   35.04    2.99
   4  -8  -7   88.78    6.53
  -4  -8   7   92.26    6.45
   4  -8  -7   92.07    6.29
  -4  -8   7   91.63    6.08
   4  -8  -7   85.92    6.05
  -4   8   7   90.94    5.68
  -4   8   7   86.23    6.45
   4   8  -7   73.58    6.29
  -3  -8   7    0.24    0.33
  -3  -8   7   -0.13    0.25
   3  -8  -7   -0.23    0.28
  -3  -8   7    0.22    0.28
   3  -8  -7    0.16    0.32
  -3   8   7   -0.17    0.27
  -3   8   7   -0.14    0.23
   3   8  -7    0.14    0.53
  -2  -8   7    4.08    0.73
   2  -8  -7    2.93    0.66
   2  -8  -7    3.85    0.81
  -2  -8   7    3.52    0.66
  -2  -8   7    4.19    0.75
   2   8  -7    2.42    0.82
  -2   8   7    3.26    0.76
  -2   8   7    4.26    0.73
  -1  -8   7   99.98    6.42
   1  -8  -7   91.16    6.44
  -1  -8   7   96.25    6.50
   1  -8  -7   87.96    6.91
  -1   8   7   97.78    6.93
   1   8  -7   90.21    6.81
  -1   8   7   97.88    6.09
   0  -8   7   11.12    1.34
   0  -8  -7   16.57    1.32
[truncated: 2,301,670 more chars]
